# Supplementary material for: Synthesis, structure and redox properties of single-atom bridged diuranium complexes supported by aryloxides
Source: Royal Society of Chemistry journal article supplement (doi:10.1039/d4dt01819b), 2024-01-01
Supplement: d4dt01819b1.pdf [file d4dt01819b1.pdf]

## Synthesis, structure and redox properties of single-atom bridged diuranium complexes supported by aryloxides

Fang-Che Hsueh,<sup>a</sup> Luciano Barluzzi,<sup>a</sup> T. Rajeshkumar<sup>b</sup>, Rosario Scopelliti,<sup>c</sup> Ivica Zivcovic,<sup>d</sup> Laurent Maron<sup>b\*</sup> and Marinella Mazzanti<sup>a\*</sup>

---

[a] F.-C. Hsueh, L. Barluzzi, Prof. M. Mazzanti

Group of Coordination Chemistry, Institut des Sciences et Ingénierie Chimiques, École Polytechnique Fédérale de Lausanne (EPFL), 1015, Lausanne, Switzerland. Email: [marinella.mazzanti@epfl.ch](mailto:marinella.mazzanti@epfl.ch).

[b]. T. Rajeshkumar, Prof. L. Maron

Laboratoire de Physique et Chimie des Nano-objets, Institut National des Sciences Appliquées, 31077 Toulouse, Cedex 4, France.

[c] Dr. R. Scopelliti, Institut des Sciences et Ingénierie Chimiques, École Polytechnique Fédérale de Lausanne (EPFL), 1015, Lausanne, Switzerland.

[d] Laboratory for Quantum Magnetism, Institute of Physics, Ecole Polytechnique Fédérale de Lausanne (EPFL), CH-1015 Lausanne, Switzerland.

\*Email to whom correspondence should be addressed: [marinella.mazzanti@epfl.ch](mailto:marinella.mazzanti@epfl.ch)

## Table of Contents

|     |                                                  |     |
|-----|--------------------------------------------------|-----|
| S1. | <i>Materials and Physical Measurements</i> ..... | 3   |
| S2. | <i>Synthesis</i> .....                           | 5   |
| S3. | <i>NMR Spectroscopic Data</i> .....              | 10  |
| S4. | <i>Electrochemistry Data</i> .....               | 36  |
| S5. | <i>SQUID Magnetometry Data</i> .....             | 38  |
| S6. | <i>X-ray Crystallography Data</i> .....          | 46  |
| S7. | <i>Computational Details</i> .....               | 48  |
| S8. | <i>References</i> .....                          | 139 |

## Experimental Procedures

### S1. Materials and Physical Measurements

#### General Considerations

Unless otherwise noted, all manipulations were carried out at ambient temperature under an inert argon or nitrogen atmosphere using Schlenk techniques and an MBraun glovebox equipped with a purifier unit. The water and oxygen levels were always kept at less than 0.1 ppm. Glassware was dried overnight at 140 °C before use.

**NMR experiments** were carried out using NMR tubes adapted with J-Young valves. NMR spectra were recorded on Bruker 400 MHz spectrometers and referenced to residual solvent resonances of THF ( $d_6$ -THF) and toluene ( $d_8$ -toluene).

**Elemental analyses** were performed under an inert atmosphere of nitrogen with a ThermoScientific Flash 2000 Organic Elemental Analyzer.

**Cyclic voltammetry** data were carried out at room temperature in an argon-filled glovebox described above. Data were collected using a Biologic SP-300 potentiostat connected to a personal computer. All samples were measured with 0.1 M [NBu<sub>4</sub>][BPh<sub>4</sub>] supporting electrolyte in THF solution. The experiments were carried out with a platinum disk (d = 5 mm) working electrode, a platinum wire counter electrode, and an Ag/AgCl reference electrode. Potential calibration was performed at the end of each data collection cycle using the decamethylferrocene (Fc<sup>\*</sup>) /decamethylferrocenium couple as an internal standard.

**Magnetic measurements** were performed using a Quantum Design MPMS3 superconducting quantum interference device (SQUID) magnetometer in a temperature range 2-300 K. The powder sample was enclosed in an evacuated quartz capsule and placed inside a plastic straw. The measurements were performed with applied magnetic field of 1T in the zero-field cooled (ZFC) regime. Diamagnetic corrections were applied using Pascal's constants<sup>1</sup>. The magnetic moment per uranium ion was calculated using the formula:

$$\mu_{\text{eff}} = \sqrt{\frac{8\chi T}{2}}$$

**Starting materials.** Unless otherwise noted, reagents were purchased from commercial suppliers and used without further purification. Anhydrous solvents were purchased from Aldrich and further distilled from K/benzophenone (THF, Et<sub>2</sub>O and toluene), sodium sand/benzophenone (*n*-hexane). Deuterated solvents for NMR spectroscopy were purchased from Cortecnet, freeze-degassed and distilled over K/benzophenone (THF- $d_6$ , toluene- $d_8$ ). Azobenzene (PhNNPh), triphenylphosphine sulfide (Ph<sub>3</sub>PS), 2,6-di-*tert*-butylphenol (HOAr), 2.2.2-cryptand, and caesium azide (CsN<sub>3</sub>) were purchased from Sigma-Aldrich and dried under high vacuum prior to use. Depleted uranium was purchased from Ibilabs, Florida, USA. KC<sub>8</sub><sup>2</sup>, IMesN<sub>2</sub>O<sup>3</sup>, KOAr<sup>4</sup>, [U(OAr)<sub>3</sub>]<sup>5</sup>, and [U(OAr)<sub>4</sub>]<sup>4</sup> were prepared according to the published procedure. [(U(OAr)<sub>3</sub>)<sub>2</sub>(μ-O)] (**A**) and [(U(OAr)<sub>3</sub>)<sub>2</sub>(μ-S)] (**B**) were synthesized using a modified published procedure<sup>6</sup>.

**Caution:** Depleted uranium (primary isotope  $^{238}\text{U}$ ) is a weak  $\alpha$ -emitter (4.197 MeV) with a half-life of  $4.47 \times 10^9$  years. Manipulations and reactions should be carried out in monitored fume hoods or in an inert atmosphere glovebox in a radiation laboratory equipped with  $\alpha$ - and  $\beta$ -counting equipment.

**X-ray crystallography** data for the analyzed crystal structures were selected and mounted on various Rigaku diffractometers (XtaLAB Synergy R, DW system, HyPix-Arc 150 detector or SuperNova, Dual, Cu at home/near, AtlasS type detectors). The crystals were kept at a steady  $T = 140.00(10)$  K during data collection. Data were measured using  $\omega$  scans with Cu  $K_{\alpha}$  radiation. The diffraction patterns were indexed and the total number of runs and images were based on the strategy calculation from the program CrysAlisPro 1.171.42.72a (Rigaku OD, 2022)<sup>7</sup>. The unit cells were refined using CrysAlisPro 1.171.42.72a (Rigaku OD, 2022)<sup>7</sup>. Data reduction, scaling and absorption corrections were performed using CrysAlisPro 1.171.42.72a (Rigaku OD, 2022)<sup>7</sup>. The structures were solved with the **ShelXT** (Sheldrick, 2015)<sup>8</sup> solution program using dual methods and by using **Olex2** 1.5 (Dolomanov et al., 2009)<sup>9</sup> as the graphical interface. The models were refined with **ShelXL** 2018/3 (Sheldrick, 2015)<sup>10</sup> using full matrix least squares minimization on **F2**. All non-hydrogen atoms were refined anisotropically. The positions of the hydrogen atom were calculated geometrically and refined using the riding model. Several structures displayed problems dealing with disorder (disordered ligands or solvent) or twinning. The major employed technique was the split model combined with a series of restraints and constraints. The restraints and constraints are used in order to get acceptable bond lengths and angles and/or anisotropic behavior. In some cases, the twinning treatment has been used for real twins or for multi-crystals, in order to properly separate the different domains. Finally, in some structures the solvent molecules were difficult to handle and the mask algorithm (by Olex2) was used to squeeze them completely from the final model. **CCDC deposition numbers** (<https://www.ccdc.cam.ac.uk/services/structures?id=doi:10.1002/anie.202317346>) 2362157 (complex **1**), 2362158 (complex **2**), 2362159 (complex **4**), 2362160 (complex **5**), 2362161 (complex **6**), contain the supplementary crystallographic data for this paper. These data are provided free of charge by the joint Cambridge Crystallographic Data Centre and Fachinformationszentrum Karlsruhe (<http://www.ccdc.cam.ac.uk/structures>).

## S2. Synthesis

### Synthesis of [(U(OAr)<sub>3</sub>)<sub>2</sub>(μ-O)] (A)

A yellow suspension of IMesN<sub>2</sub>O (44.0 mg, 0.126 mmol, 0.5 equiv.) in THF (2.5 mL) was added to a dark green solution of complex [U(OAr)<sub>3</sub>] (215.8 mg, 0.2526 mmol, 1.0 equiv.) in THF (2.5 mL) at -80 °C. N<sub>2</sub> evolution was observed. The reaction mixture was allowed to react for 5 hours at -80 °C, yielding a dark yellow solution. The volatiles were removed under vacuum and the residue was dissolved in a mixture of toluene (5.0 mL) and Et<sub>2</sub>O (1.0 mL). The resulting solution was stored at -40 °C overnight affording a yellow powder. The resulting powder was washed with cold Et<sub>2</sub>O (1.0 mL), affording product **A** (175.3 mg, 80%). Multiple attempts to isolate single crystals of **A** for X-Ray diffraction studies proved unsuccessful due to the poor crystal quality. Analytical data matched those previously reported<sup>6</sup>. <sup>1</sup>H NMR (400 MHz, THF-*d*<sub>8</sub>, 298 K): δ 14.20 ppm (s, 12H, -OAr), δ 12.17 ppm (s, 6H, -OAr), δ -11.26 (br s, 108H, -C(CH<sub>3</sub>)<sub>3</sub>) (**Figure S2**). *Anal. Calcd.* for **A**, C<sub>84</sub>H<sub>126</sub>O<sub>7</sub>U<sub>2</sub>: C: 58.52; H: 7.37; N: 0.00. *Found*: C: 58.13; H: 7.21; N: 0.00.

### Synthesis of [(U(OAr)<sub>3</sub>)<sub>2</sub>(μ-S)] (B)

A suspension of Ph<sub>3</sub>PS (35.4 mg, 0.120 mmol, 0.5 equiv.) in toluene (2.0 mL) was added to a dark green solution of complex [U(OAr)<sub>3</sub>] (205.0 mg, 0.240 mmol, 1.0 equiv.) in toluene (1.0 mL) at room temperature. The reaction mixture was stirred for 3 hours at room temperature, yielding a dark orange solution. The volatiles were removed under vacuum and the residue was dissolved in a mixture of toluene (2.0 mL) and Et<sub>2</sub>O (1.0 mL). The resulting solution was stored at -40 °C overnight affording orange powder. The resulting powder was washed with cold Et<sub>2</sub>O (1.0 mL), affording product **B** (190.4 mg, 91%). Analytical data matched those previously reported<sup>6</sup>. <sup>1</sup>H NMR (400 MHz, toluene-*d*<sub>8</sub>, 298 K): δ 15.34 ppm (d, *J* = 8.1 Hz, 12H, -OAr), δ 11.75 ppm (t, *J* = 7.9 Hz, 6H, -OAr), δ -8.67 (s, 108H, -C(CH<sub>3</sub>)<sub>3</sub>) (**Figure S4**). *Anal. Calcd.* for **B**, C<sub>84</sub>H<sub>126</sub>O<sub>6</sub>SU<sub>2</sub>: C: 57.98; H: 7.30; N: 0.00; S: 1.84. *Found*: C: 57.93; H: 7.06; N: 0.00; S: 1.78.

### Synthesis of [Cs(THF)<sub>8</sub>][(U(OAr)<sub>3</sub>)<sub>2</sub>(μ-N)] (1)

A dark green solution of complex [U(OAr)<sub>3</sub>] (84.9 mg, 0.0994 mmol, 1.0 equiv.) in THF (1.0 mL) was added to a suspension of CsN<sub>3</sub> (8.7 mg, 0.050 mmol, 0.5 equiv.) in THF (1.0 mL) at -40 °C. The reaction mixture was stirred for 4 days at -40 °C, yielding a dark orange solution. The volatiles were removed under vacuum and the residue was dissolved in a mixture of THF (2.0 mL) and *n*-hexane (1.0 mL). The resulting solution was stored at -40 °C overnight affording orange powder of complex **1** (93.9 mg, 88%). X-ray quality crystals **1** were obtained by cooling a concentrated THF/*n*-hexane solution to -40 °C. <sup>1</sup>H NMR (400 MHz, THF-*d*<sub>8</sub>, 298 K): δ 5.74 ppm, δ -8.54 ppm (**Figure S6**). <sup>1</sup>H NMR (400 MHz, THF-*d*<sub>8</sub>, 233 K): δ 96.95 ppm, δ -19.72 ppm, δ -39.15 ppm (**Figure S7**). *Anal. Calcd.* for [Cs(THF)<sub>5</sub>][(U(OAr)<sub>3</sub>)<sub>2</sub>(μ-N)], C<sub>104</sub>H<sub>166</sub>CsNO<sub>11</sub>U<sub>2</sub>: C: 56.38; H: 7.55; N: 0.63. *Found*: C: 56.70; H: 7.52; N: 0.84. The caesium bound THF was lost during the drying process.

### Reduction of [Cs(THF)<sub>8</sub>][(U(OAr)<sub>3</sub>)<sub>2</sub>(μ-N)] (1) with 5.0 equiv. of KC<sub>8</sub> at -80 °C (NMR test reaction)

A dark orange solution of complex **1** (10.1 mg, 0.00488 mmol, 1.0 equiv.) in THF-*d*<sub>8</sub> (0.25 mL) was added to a bronze suspension of KC<sub>8</sub> (3.3 mg, 0.024 mmol, 5.0 equiv.) in THF-*d*<sub>8</sub> (0.15 mL) at -80 °C. The reaction mixture was allowed to react for 6 hours at -80 °C. The <sup>1</sup>H NMR spectrum of the reaction mixture showed resonances assigned to **1** and unidentified species (**Figure S8**).

#### **Reduction of [Cs(THF)<sub>8</sub>][(U(OAr)<sub>3</sub>)<sub>2</sub>(μ-N)] (1) with 1.0-2.0 equiv. of KC<sub>8</sub> at -40 °C (NMR test reaction)**

A dark orange solution of complex **1** (15.3 mg, 0.00739 mmol, 1.0 equiv.) in THF-*d*<sub>8</sub> (0.25 mL) was added to a bronze suspension of KC<sub>8</sub> (1.0 mg, 0.00739 mmol, 1.0 equiv.) in THF-*d*<sub>8</sub> (0.15 mL) at -40 °C. The reaction mixture was allowed to react for 30 minutes at -40 °C. The <sup>1</sup>H NMR spectrum of the reaction mixture showed resonances assigned to **1** and a new species (**Figure S9**). A bronze suspension of KC<sub>8</sub> (1.0 mg, 0.00739 mmol, 1.0 equiv.) in THF-*d*<sub>8</sub> (0.15 mL) was added to a stirring reaction mixture at -40 °C and stirred for 30 minutes at -40 °C. The <sup>1</sup>H NMR spectrum of the reaction mixture showed resonances assigned to a new species and the disappearance of those corresponding to complex **1** (**Figure S9**). The reaction mixture was filtered on a porosity 4 glass frit, yielding a dark brown solution. Attempts to isolate X-ray quality crystals were not successful preventing further characterization.

#### **Reduction of [Cs(THF)<sub>8</sub>][(U(OAr)<sub>3</sub>)<sub>2</sub>(μ-N)] (1) with 3.0 equiv. of KC<sub>8</sub> at -40 °C (NMR test reaction)**

A dark orange solution of complex **1** (11.1 mg, 0.00536 mmol, 1.0 equiv.) in THF-*d*<sub>8</sub> (0.25 mL) was added to a bronze suspension of KC<sub>8</sub> (2.2 mg, 0.016 mmol, 3.0 equiv.) in THF-*d*<sub>8</sub> (0.15 mL) at -40 °C. The reaction mixture was allowed to react for 30 minutes at -40 °C. The <sup>1</sup>H NMR spectrum of the reaction mixture showed multiple unidentified resonances (**Figure S9**). Attempts to isolate X-ray quality crystals were not successful preventing further characterization.

#### **Reduction of [(U(OAr)<sub>3</sub>)<sub>2</sub>(μ-O)] (A) with 1.0-5.0 equiv. of KC<sub>8</sub> at -80 °C (NMR test reaction)**

A pale yellow solution of complex **A** (16.8 mg, 0.00974 mmol, 1.0 equiv.) in THF-*d*<sub>8</sub> (0.25 mL) was added to a bronze suspension of KC<sub>8</sub> (1.4 mg, 0.010 mmol, 1.0 equiv.) in THF-*d*<sub>8</sub> (0.15 mL) at -80 °C. The reaction mixture was allowed to react for 20 minutes at -80 °C. The <sup>1</sup>H NMR spectrum of the reaction mixture showed one set of resonances assigned to U<sup>III</sup>/U<sup>IV</sup> "[K(THF)<sub>x</sub>][(U(OAr)<sub>3</sub>)<sub>2</sub>(μ-O)]" (**Figure S10**). A bronze suspension of KC<sub>8</sub> (1.4 mg, 0.010 mmol, 1.0 equiv.) in THF-*d*<sub>8</sub> (0.15 mL) was added to reaction mixture and reacted for 20 minutes at -80 °C. The <sup>1</sup>H NMR spectrum of the reaction mixture showed two sets of resonances assigned to U<sup>III</sup>/U<sup>IV</sup> "[K(THF)<sub>x</sub>][(U(OAr)<sub>3</sub>)<sub>2</sub>(μ-O)]" and U<sup>III</sup>/U<sup>III</sup> "[K(THF)<sub>x</sub>]<sub>2</sub>[(U(OAr)<sub>3</sub>)<sub>2</sub>(μ-O)]" (**Figure S10**). A bronze suspension of KC<sub>8</sub> (4.0 mg, 0.030 mmol, 3.0 equiv.) in THF-*d*<sub>8</sub> (0.15 mL) was added to reaction mixture and reacted for 20 minutes at -80 °C. The <sup>1</sup>H NMR spectrum of the reaction mixture showed only one set of resonances assigned to U<sup>III</sup>/U<sup>III</sup> "[K(THF)<sub>x</sub>]<sub>2</sub>[(U(OAr)<sub>3</sub>)<sub>2</sub>(μ-O)]" (**Figure S10**). Multiple attempts to isolate single crystals for X-Ray diffraction studies proved unsuccessful due to the instability of U<sup>III</sup>/U<sup>III</sup> "[K(THF)<sub>x</sub>]<sub>2</sub>[(U(OAr)<sub>3</sub>)<sub>2</sub>(μ-O)]" at -40 °C (**Figure S11**).

#### **Reduction of [(U(OAr)<sub>3</sub>)<sub>2</sub>(μ-O)] (A) with 5.0 equiv. of KC<sub>8</sub> and 5.0 equiv. of Lil at -80 °C (NMR test reaction)**

A pale yellow solution of complex **A** (9.6 mg, 0.0056 mmol, 1.0 equiv.) and lithium iodide (3.8 mg, 0.028 mmol, 5.0 equiv.) in THF-*d*<sub>8</sub> (0.25 mL) was added to a bronze suspension of KC<sub>8</sub> (3.9 mg, 0.029 mmol, 5.0 equiv.) in THF-*d*<sub>8</sub> (0.15 mL) at -80 °C. The reaction mixture was allowed to react for 20 minutes at -80 °C. The <sup>1</sup>H NMR spectrum of the reaction mixture showed one set of resonances assigned to U<sup>III</sup>/U<sup>III</sup> "[Li(THF)<sub>x</sub>]<sub>2</sub>[(U(OAr)<sub>3</sub>)<sub>2</sub>(μ-O)]" (**Figure S12**). Multiple attempts to isolate single crystals for X-Ray diffraction studies proved unsuccessful due to the instability of U<sup>III</sup>/U<sup>III</sup> "[Li(THF)<sub>x</sub>]<sub>2</sub>[(U(OAr)<sub>3</sub>)<sub>2</sub>(μ-O)]" at -40 °C (**Figure S13**). Only a few X-ray quality crystals of the decomposition products, U<sup>III</sup>/U<sup>IV</sup> [Li(THF)<sub>4</sub>][(U(OAr)<sub>3</sub>)<sub>2</sub>(μ-O)](**2**) could be isolated from a concentrated THF/*n*-hexane solution after 1 day at -40 °C. Attempts to isolate complex **2** in higher yield were not successful preventing further characterization.

### Reduction of [(U(OAr)<sub>3</sub>)<sub>2</sub>(μ-O)] (A) with 5.0 equiv. of KC<sub>8</sub>, followed by the addition of 2.0 equiv. of 2.2.2-cryptand (NMR test reaction)

A pale yellow solution of complex **A** (8.4 mg, 0.0049 mmol, 1.0 equiv.) in THF-*d*<sub>8</sub> (0.25 mL) was added to a bronze suspension of KC<sub>8</sub> (3.6 mg, 0.027 mmol, 5.0 equiv.) in THF-*d*<sub>8</sub> (0.15 mL) at -80 °C. The reaction mixture was allowed to react for 20 minutes at -80 °C. The reaction mixture was filtered on a porosity 4 glass frit, yielding a dark red-brown solution. The <sup>1</sup>H NMR spectrum of the reaction mixture showed only one set of resonances assigned to U<sup>III</sup>/U<sup>III</sup> "[K(THF)<sub>x</sub>]<sub>2</sub>[(U(OAr)<sub>3</sub>)<sub>2</sub>(μ-O)]" (**Figure S14**). A 2.2.2-cryptand (3.8 mg, 0.010 mmol, 2.0 equiv.) solution in THF-*d*<sub>8</sub> (0.1 mL) was added to this dark red-brown solution at -80 °C. The <sup>1</sup>H NMR spectrum of the resulting solution showed the presence of complex **3**, with signals slightly shifted compared to U<sup>III</sup>/U<sup>III</sup> "[K(THF)<sub>x</sub>]<sub>2</sub>[(U(OAr)<sub>3</sub>)<sub>2</sub>(μ-O)]", indicating weak interactions between the K<sup>+</sup> ions and the ligands in "[K(THF)<sub>x</sub>]<sub>2</sub>[(U(OAr)<sub>3</sub>)<sub>2</sub>(μ-O)]" in THF solution (**Figure S14**).

### Synthesis of [K(2.2.2-cryptand)]<sub>2</sub>[(U(OAr)<sub>3</sub>)<sub>2</sub>(μ-O)] (3)

A pale yellow solution of complex **A** (40.7 mg, 0.0236 mmol, 1.0 equiv.) and 2.2.2-cryptand (17.9 mg, 0.0475 mmol, 2.0 equiv.) in THF (2.0 mL) was added to a bronze suspension of KC<sub>8</sub> (16.8 mg, 0.0124 mmol, 5.0 equiv.) in THF (1.0 mL) at -80 °C. The reaction mixture was allowed to react for 20 minutes at -80 °C. The reaction mixture was filtered on a porosity 4 glass frit at -80 °C, yielding a dark red-brown solution. The filtrate was evaporated while maintaining the reaction flask at a -80 °C, and the resulting residue was washed with cold toluene (1.0 mL) and *n*-hexane (1.0 mL), affording analytically pure dark powder of complex **3** (48.2 mg, 80%). Complex **3** is only stable in the THF solution at -40 °C for 3 hours and fully decomposes after 6 hours at -40 °C (**Figure S17**). Multiple attempts to isolate single crystals for X-Ray diffraction studies proved unsuccessful due to the instability of **3** at -40 °C. <sup>1</sup>H NMR (400 MHz, THF-*d*<sub>8</sub>, 193 K): δ 55.90 ppm, δ 9.48 ppm, δ -8.48 ppm, δ -27.17 ppm, δ -34.56 ppm (**Figure S16**). *Anal. Calcd.* for **2**, C<sub>120</sub>H<sub>198</sub>K<sub>2</sub>N<sub>4</sub>O<sub>19</sub>U<sub>2</sub>: C: 56.41; H: 7.81; N: 2.19. *Found*: C: 56.08; H: 7.60; N: 2.11.

### Reactivity of **3** with azobenzene (PhNNPh)

#### Synthesis of [K(2.2.2-cryptand)(THF)][(U(OAr)<sub>3</sub>)<sub>2</sub>(μ-O)] · [K(2.2.2-cryptand)(THF)][PhNNPh], **4** · [K(2.2.2-cryptand)(THF)][PhNNPh]

An orange solution of PhNNPh (1.7 mg, 0.0093 mmol, 1.0 equiv.) in THF-*d*<sub>8</sub> (0.1 mL) was added to a dark red-brown solution of complex **3** (24.0 mg, 0.00939 mmol, 1.0 equiv.) in THF-*d*<sub>8</sub> (0.5 mL) at -80 °C, yielding a dark yellow-brown solution. The <sup>1</sup>H NMR spectrum of the reaction mixture showed the presence of new resonance assigned to **4**. The volatiles were removed under vacuum and the residue was dissolved in THF (0.5 mL). The resulting solution was stored at -40 °C overnight affording dark brown crystalline powder of complex **4** · [K(2.2.2-cryptand)(THF)][PhNNPh] (13.3 mg, 52%). X-ray quality crystals **4** · [K(2.2.2-cryptand)(THF)][PhNNPh] were obtained by cooling a concentrated THF solution to -40 °C. <sup>1</sup>H NMR (400 MHz, THF-*d*<sub>8</sub>, 193 K): δ 66.63 ppm, δ 22.21 ppm, δ 18.90 ppm, δ 14.63 ppm, δ 13.27 ppm, δ -2.98 ppm, δ 59.02 ppm (**Figure S19**). The <sup>1</sup>H NMR spectrum is consistent with the *in-situ* formation of **4** from the mono-reduction of **A** with KC<sub>8</sub> and 2.2.2-cryptand (**Figure S18**). *Anal. Calcd.* for [K(2.2.2-cryptand)][(U(OAr)<sub>3</sub>)<sub>2</sub>(μ-O)] · [K(2.2.2-cryptand)][PhNNPh], C<sub>132</sub>H<sub>208</sub>K<sub>2</sub>N<sub>6</sub>O<sub>19</sub>U<sub>2</sub>: C: 57.92; H: 7.66; N: 3.07. *Found*: C: 57.47; H: 7.61; N: 2.89. The potassium bound THF was lost during the drying process.

### Reduction of $[(U(OAr)_3)_2(\mu-O)]$ (**A**) with 1.0 equiv. of $KC_8$ and 1.0 equiv. of 2.2.2-cryptand at -80 °C (NMR test reaction)

A pale yellow solution of complex **A** (14.5 mg, 0.00841 mmol, 1.0 equiv.) and 2.2.2-cryptand (3.2 mg, 0.0085 mmol, 1.0 equiv.) in THF- $d_8$  (0.25 mL) was added to a bronze suspension of  $KC_8$  (1.2 mg, 0.0089 mmol, 1.0 equiv.) in THF- $d_8$  (0.15 mL) at -80 °C. The reaction mixture was allowed to react for 20 minutes at -80 °C. The  $^1H$  NMR spectrum of the reaction mixture showed one set of resonances assigned to  $U^{III}/U^{IV}$   $“[K(2.2.2-cryptand)][(U(OAr)_3)_2(\mu-O)]”$ . Multiple attempts to isolate single crystals for X-Ray diffraction studies proved unsuccessful.

### Reduction of $[(U(OAr)_3)_2(\mu-S)]$ (**B**) with 1.0-5.0 equiv. of $KC_8$ at -80 °C (NMR test reaction)

An orange solution of complex **B** (14.1 mg, 0.00810 mmol, 1.0 equiv.) in THF- $d_8$  (0.25 mL) was added to a bronze suspension of  $KC_8$  (1.1 mg, 0.0081 mmol, 1.0 equiv.) in THF- $d_8$  (0.15 mL) at -80 °C. The reaction mixture was allowed to react for 20 minutes at -80 °C. The  $^1H$  NMR spectrum of the reaction mixture showed one set of resonances assigned to  $U^{III}/U^{IV}$   $“[K(THF)_x]_2[(U(OAr)_3)_2(\mu-S)]”$  (**Figure S20**). A bronze suspension of  $KC_8$  (1.1 mg, 0.0081 mmol, 1.0 equiv.) in THF- $d_8$  (0.15 mL) was added to reaction mixture and reacted for 20 minutes at -80 °C. The  $^1H$  NMR spectrum of the reaction mixture showed two sets of resonances assigned to  $U^{III}/U^{IV}$   $“[K(THF)_x]_2[(U(OAr)_3)_2(\mu-S)]”$  and  $U^{III}/U^{III}$   $“[K(THF)_x]_2[(U(OAr)_3)_2(\mu-S)]”$  (**Figure S20**). A bronze suspension of  $KC_8$  (3.3 mg, 0.024 mmol, 3.0 equiv.) in THF- $d_8$  (0.15 mL) was added to reaction mixture and reacted for 20 minutes at -80 °C. The  $^1H$  NMR spectrum of the reaction mixture showed only one set of resonances assigned to  $U^{III}/U^{III}$   $“[K(THF)_x]_2[(U(OAr)_3)_2(\mu-S)]”$  (**Figure S20**). Multiple attempts to isolate single crystals for X-Ray diffraction studies proved unsuccessful due to the instability of  $U^{III}/U^{III}$   $“[K(THF)_x]_2[(U(OAr)_3)_2(\mu-S)]”$  at -40 °C (**Figure S21**).

### $^1H$ NMR spectroscopy studies of rearrangement of $“[K(THF)_x]_2[(U(OAr)_3)_2(\mu-S)]”$ in THF at -40 °C (NMR test reaction)

An orange solution of complex **B** (15.6 mg, 0.00897 mmol, 1.0 equiv.) in THF- $d_8$  (0.25 mL) was added to a bronze suspension of  $KC_8$  (6.2 mg, 0.046 mmol, 5.0 equiv.) in THF- $d_8$  (0.15 mL) at -80 °C. The reaction mixture was allowed to react for 20 minutes at -80 °C. The reaction mixture was filtered on a porosity 4 glass frit at -80 °C, yielding a dark red-brown solution. The  $^1H$  NMR spectroscopy studies of the reaction mixture showed that  $“[K(THF)_x]_2[(U(OAr)_3)_2(\mu-S)]”$  was completely consumed after 3 weeks at -40 °C, resulting in new resonances assigned to  $[KU(OAr)_4]$ ,  $KOAr$  and new species (**Figure S21**). Only a few X-ray quality crystals of  $[(K(THF)_4)_2(U(OAr)_2)_2(\mu-S)_2]$  (**5**) could be isolated from a concentrated THF/*n*-hexane solution at -40 °C. Attempts to isolate complex **5** in higher yield were not successful due to the similar solubility of **5**,  $[KU(OAr)_4]$  and  $KOAr$ , preventing further characterization. The formation of  $[KU(OAr)_4]$  was confirmed by the *in-situ* formation of  $[KU(OAr)_4]$  from the mono-reduction of  $[U(OAr)_4]$  with  $KC_8$  (**Figure S21**).

### Reduction of $[U(OAr)_4]$ with 1.2 equiv. of $KC_8$ (NMR test reaction)

A green solution of complex **A** (10.6 mg, 0.0100 mmol, 1.0 equiv.) in THF- $d_8$  (0.25 mL) was added to a bronze suspension of  $KC_8$  (1.6 mg, 0.012 mmol, 1.2 equiv.) in THF- $d_8$  (0.15 mL) at -80 °C, resulting in a dark red-brown solution. The reaction mixture was allowed to react for 20 minutes at -80 °C. The  $^1H$  NMR spectrum of the reaction mixture showed one set of resonances assigned to  $[KU(OAr)_4]$  (**Figure S21**).



### Reduction of [(U(OAr)<sub>3</sub>)<sub>2</sub>(μ-S)] (B) with 5.0 equiv. of KC<sub>8</sub>, followed by the addition of 2.0 equiv. of 2.2.2-cryptand (NMR test reaction)

An orange solution of complex **B** (8.5 mg, 0.0049 mmol, 1.0 equiv.) in THF-*d*<sub>8</sub> (0.25 mL) was added to a bronze suspension of KC<sub>8</sub> (3.5 mg, 0.026 mmol, 5.0 equiv.) in THF-*d*<sub>8</sub> (0.15 mL) at -80 °C. The reaction mixture was allowed to react for 20 minutes at -80 °C. The reaction mixture was filtered on a porosity 4 glass frit, yielding a dark red-brown solution. The <sup>1</sup>H NMR spectrum of the reaction mixture showed only one set of resonances assigned to U<sup>III</sup>/U<sup>III</sup> "[K(THF)<sub>x</sub>]<sub>2</sub>[(U(OAr)<sub>3</sub>)<sub>2</sub>(μ-S)]" (**Figure S22**). A 2.2.2-cryptand (3.7 mg, 0.0098 mmol, 2.0 equiv.) solution in THF-*d*<sub>8</sub> (0.1 mL) was added to this dark red-brown solution at -80 °C. The <sup>1</sup>H NMR spectrum of the resulting solution showed the presence of complex **6**, with signals slightly shifted compared to U<sup>III</sup>/U<sup>III</sup> "[K(THF)<sub>x</sub>]<sub>2</sub>[(U(OAr)<sub>3</sub>)<sub>2</sub>(μ-S)]", indicating weak interaction between the K<sup>+</sup> ions and the ligands in "[K(THF)<sub>x</sub>]<sub>2</sub>[(U(OAr)<sub>3</sub>)<sub>2</sub>(μ-S)]" in THF solution (**Figure S22**).

### Synthesis of [K(2.2.2-cryptand)]<sub>2</sub>[(U(OAr)<sub>3</sub>)<sub>2</sub>(μ-S)] (6)

An orange solution of complex **B** (51.7 mg, 0.0297 mmol, 1.0 equiv.) and 2.2.2-cryptand (22.4 mg, 0.0594 mmol, 2.0 equiv.) in THF (2.0 mL) was added to a bronze suspension of KC<sub>8</sub> (20.9 mg, 0.154 mmol, 5.0 equiv.) in THF (1.0 mL) at -80 °C. The reaction mixture was allowed to react for 20 minutes at -80 °C. The reaction mixture was filtered on a porosity 4 glass frit at -80 °C, yielding a dark red-brown solution. The filtrate was evaporated while maintaining the reaction flask at a -80 °C, and the resulting residue was dissolved in a mixture of cold THF (1.0 mL) and *n*-hexane (1.0 mL). The resulting solution was stored at -40 °C overnight affording dark powder of complex **6** (73.1 mg, 96%). X-ray quality crystals **6** were obtained by cooling a concentrated THF/*n*-hexane solution to -40 °C. Complex **6** is stable in the THF solution for up to 1 week at -40 °C (**Figure S25**). <sup>1</sup>H NMR (400 MHz, THF-*d*<sub>8</sub>, 193 K): δ 12.06 ppm, δ 10.88 ppm, δ 4.24 ppm, δ 4.07 ppm, δ 3.91 ppm, δ 2.53 ppm, δ 1.38 ppm (**Figure S24**). *Anal. Calcd.* for **6**, C<sub>120</sub>H<sub>198</sub>K<sub>2</sub>N<sub>4</sub>O<sub>19</sub>U<sub>2</sub>: C: 56.06; H: 7.76; N: 2.18; S: 1.25. *Found*: C: 55.76; H: 7.55; N: 2.27; S: 1.34.

### Reactivity of **6** with azobenzene (PhNNPh) (NMR test reaction)

An orange solution of PhNNPh (1.0 mg, 0.0055 mmol, 1.0 equiv.) in THF-*d*<sub>8</sub> (0.15 mL) was added to a dark red-brown solution of complex **6** (12.9 mg, 0.00502 mmol, 1.0 equiv.) in THF-*d*<sub>8</sub> (0.25 mL) at -80 °C, yielding a dark yellow-brown solution. The <sup>1</sup>H NMR spectrum of the reaction mixture showed the presence of two sets of resonance assigned to unreacted **6** and mono-reduced "[K(2.2.2-cryptand)][(U(OAr)<sub>3</sub>)<sub>2</sub>(μ-S)]" (**Figure S26**). The full consumption of **6** and the formation of "[K(2.2.2-cryptand)][(U(OAr)<sub>3</sub>)<sub>2</sub>(μ-S)]", KOAr ligand and unknown species were observed when the reaction mixture was warmed up to -40 °C after 1 hour (**Figure S26**). The major compound in the reaction mixture is consistent with the *in-situ* formation of mono-reduced "[K(2.2.2-cryptand)][(U(OAr)<sub>3</sub>)<sub>2</sub>(μ-S)]" from the mono-reduction of **B** with KC<sub>8</sub> and 2.2.2-cryptand (**Figure S26**).

### Reduction of [(U(OAr)<sub>3</sub>)<sub>2</sub>(μ-S)] (B) with 1.0 equiv. of KC<sub>8</sub> and 1.0 equiv. of 2.2.2-cryptand at -80 °C (NMR test reaction)

An orange solution of complex **B** (11.8 mg, 0.00678 mmol, 1.0 equiv.) and 2.2.2-cryptand (2.7 mg, 0.0072 mmol, 1.0 equiv.) in THF-*d*<sub>8</sub> (0.25 mL) was added to a bronze suspension of KC<sub>8</sub> (1.0 mg, 0.0074 mmol, 1.0 equiv.) in THF-*d*<sub>8</sub> (0.15 mL) at -80 °C. The reaction mixture was allowed to react for 20 minutes at -80 °C. The <sup>1</sup>H NMR spectrum of the reaction mixture showed one set of resonances assigned to U<sup>III</sup>/U<sup>IV</sup> "[K(2.2.2-cryptand)][(U(OAr)<sub>3</sub>)<sub>2</sub>(μ-S)]" (**Figure S26**).

### S3. NMR Spectroscopic Data

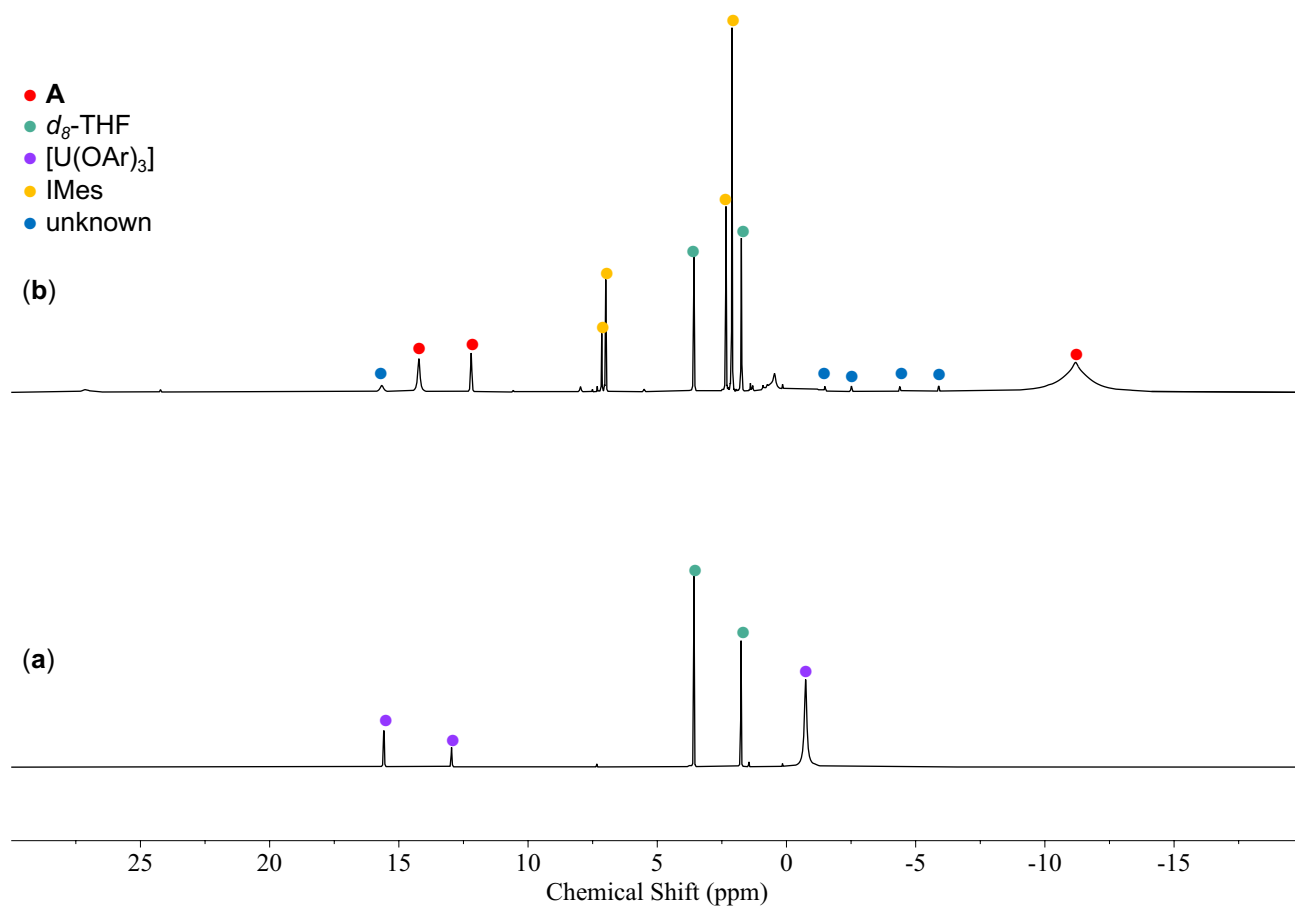

**Figure S1.**  $^1\text{H}$  NMR spectra (400 MHz,  $\text{THF-}d_8$ , 298 K) of the reaction mixture obtained after addition of 0.5 equiv. of  $\text{IMesN}_2\text{O}$  to  $[\text{U}(\text{OAr})_3]$  at  $-80^\circ\text{C}$  (a) before (b)  $[\text{U}(\text{OAr})_3]$  and 0.5 equiv. of  $\text{IMesN}_2\text{O}$  after 5 h, resulted in complex **A**.

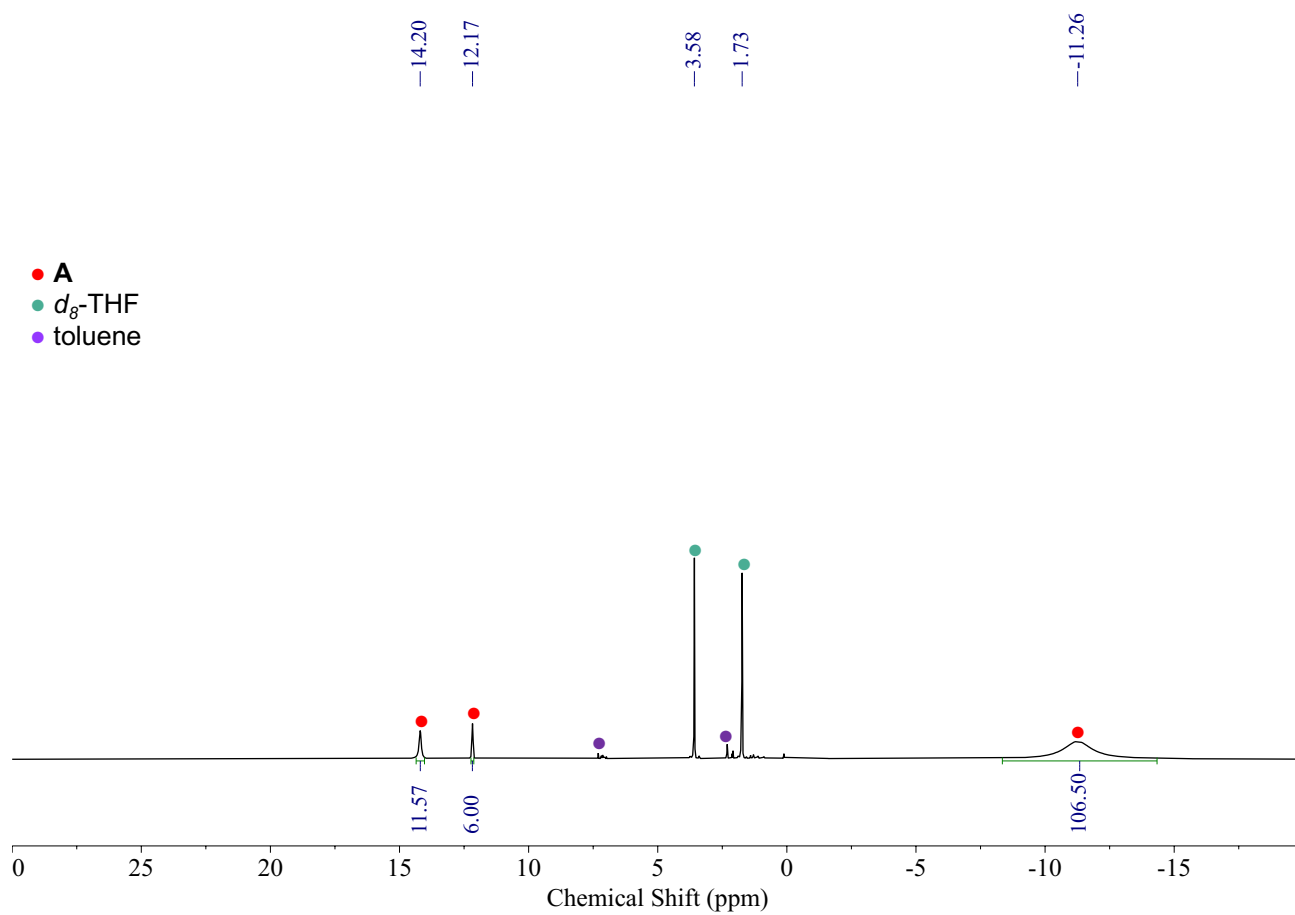

**Figure S2.**  $^1\text{H}$  NMR spectrum (400 MHz,  $\text{THF-}d_8$ , 298 K) of isolated **A**.

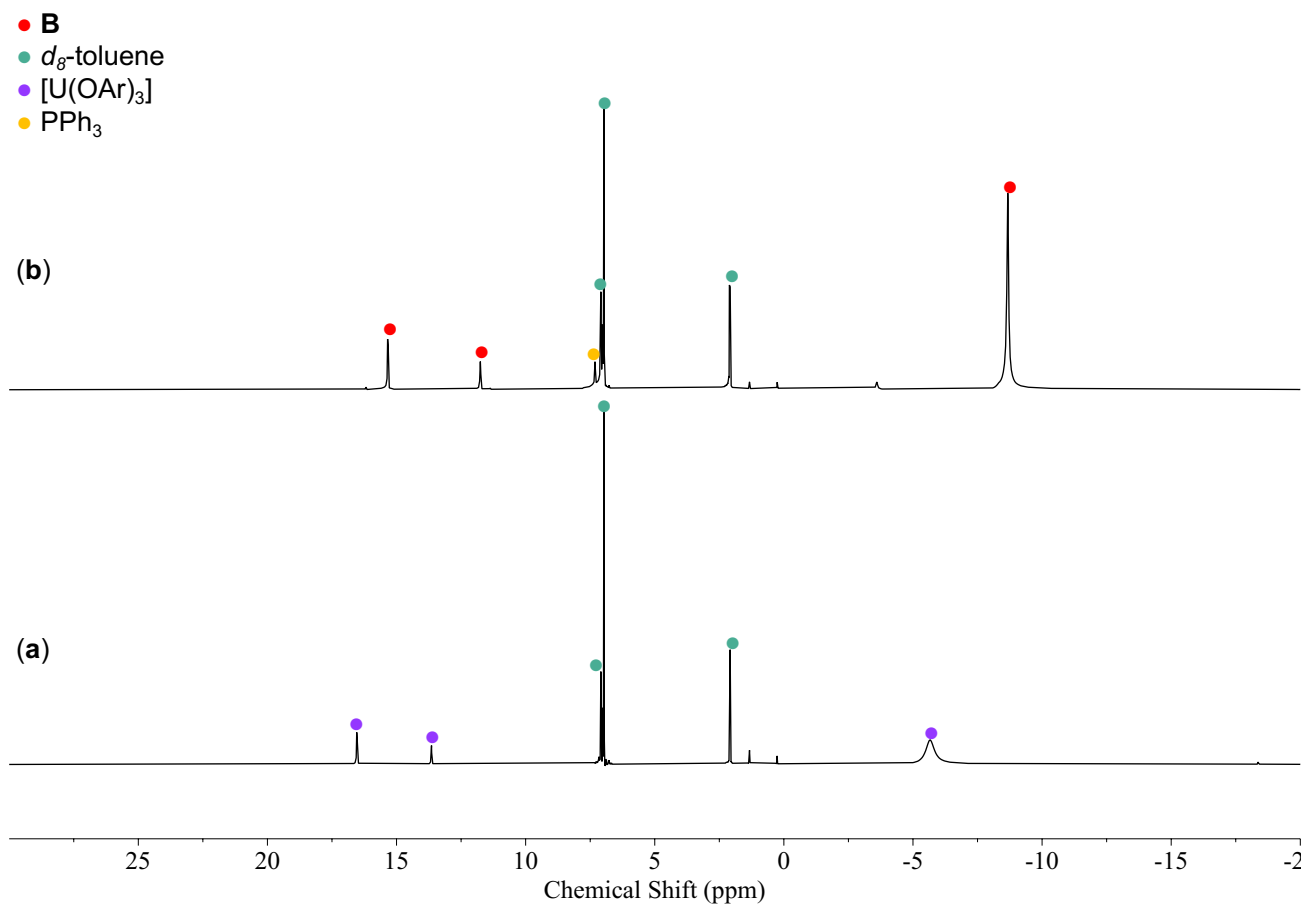

**Figure S3.**  $^1H$  NMR spectra (400 MHz,  $THF-d_8$ , 298 K) of the reaction mixture obtained after addition of 0.5 equiv. of  $Ph_3PS$  to  $[U(OAr)_3]$  at room temperature (a) before (b)  $[U(OAr)_3]$  and 0.5 equiv. of  $Ph_3PS$  after 3 h, resulted in complex **B**.

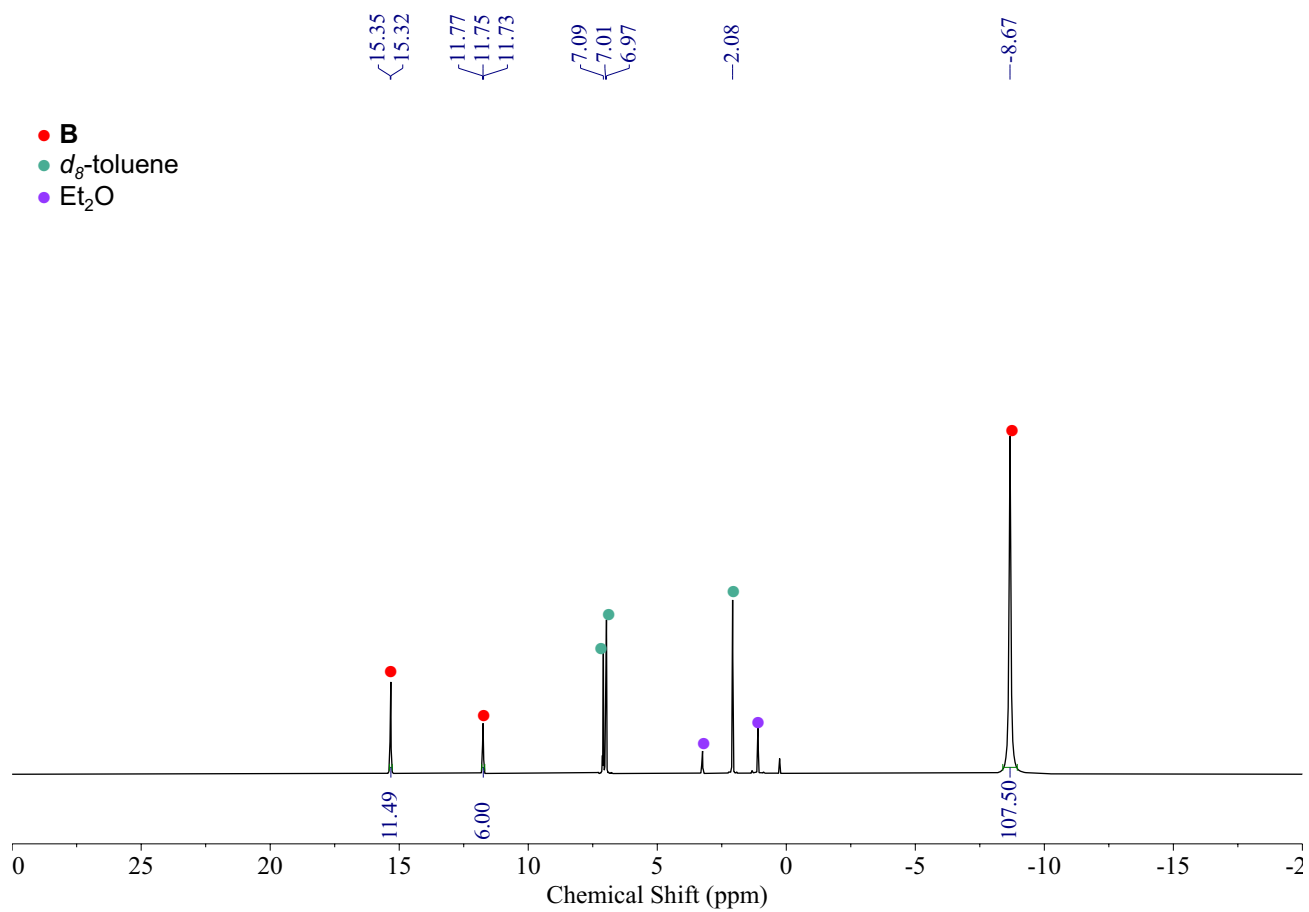

**Figure S4.**  $^1\text{H}$  NMR spectrum (400 MHz, toluene- $d_8$ , 298 K) of isolated **B**.

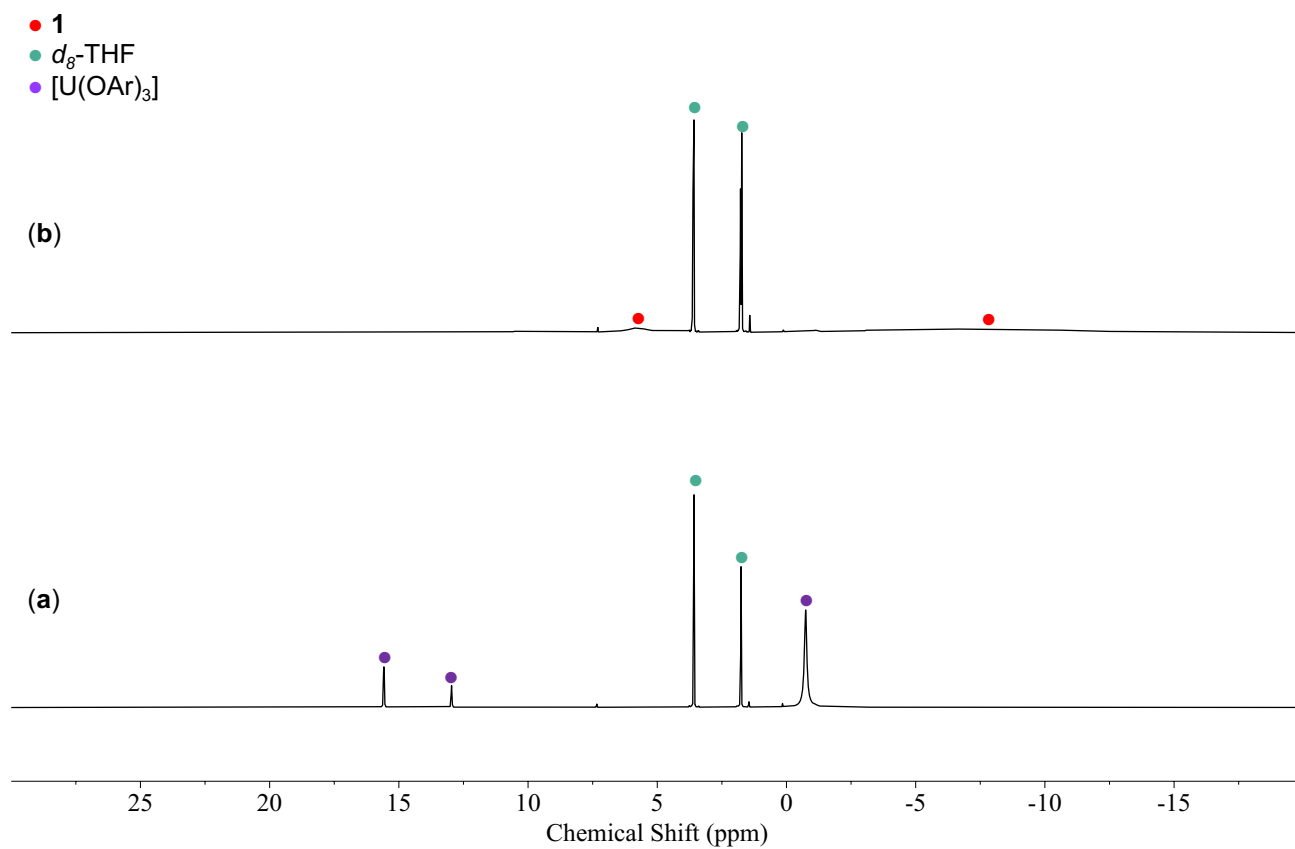

**Figure S5.**  $^1\text{H}$  NMR spectra (400 MHz,  $\text{THF-}d_8$ , 298 K) of the reaction mixture obtained after addition of 0.5 equiv. of  $\text{CsN}_3$  to  $[\text{U}(\text{OAr})_3]$  at  $-40\text{ }^\circ\text{C}$  (a) before (b)  $[\text{U}(\text{OAr})_3]$  and 0.5 equiv. of  $\text{CsN}_3$  after 4 days, resulted in complex **1**.

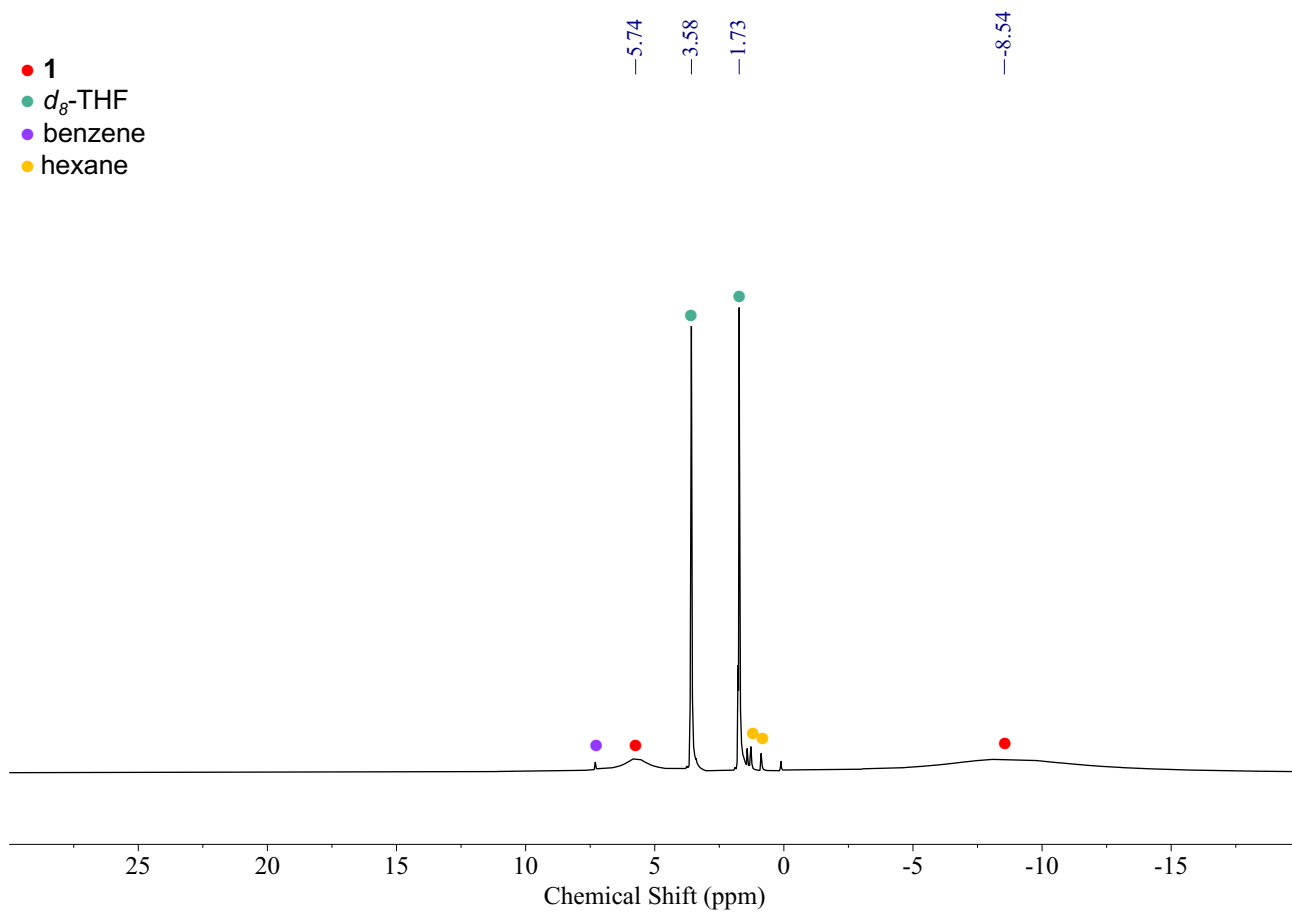

**Figure S6.**  $^1\text{H}$  NMR spectrum (400 MHz,  $\text{THF-}d_8$ , 298 K) of isolated **1**.

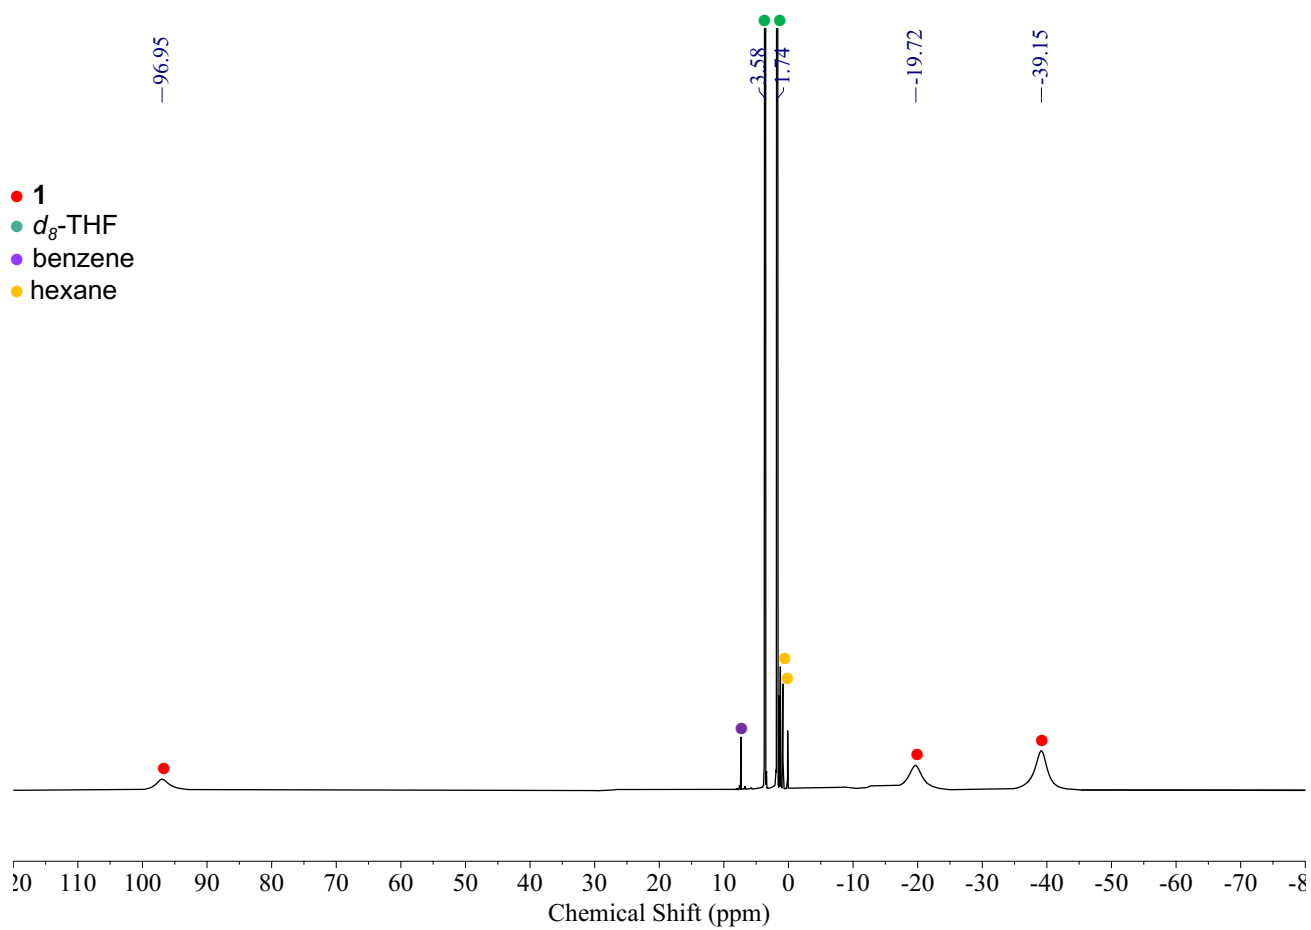

**Figure S7.** <sup>1</sup>H NMR spectrum (400 MHz, THF-*d*<sub>8</sub>, 233 K) of isolated **1**.



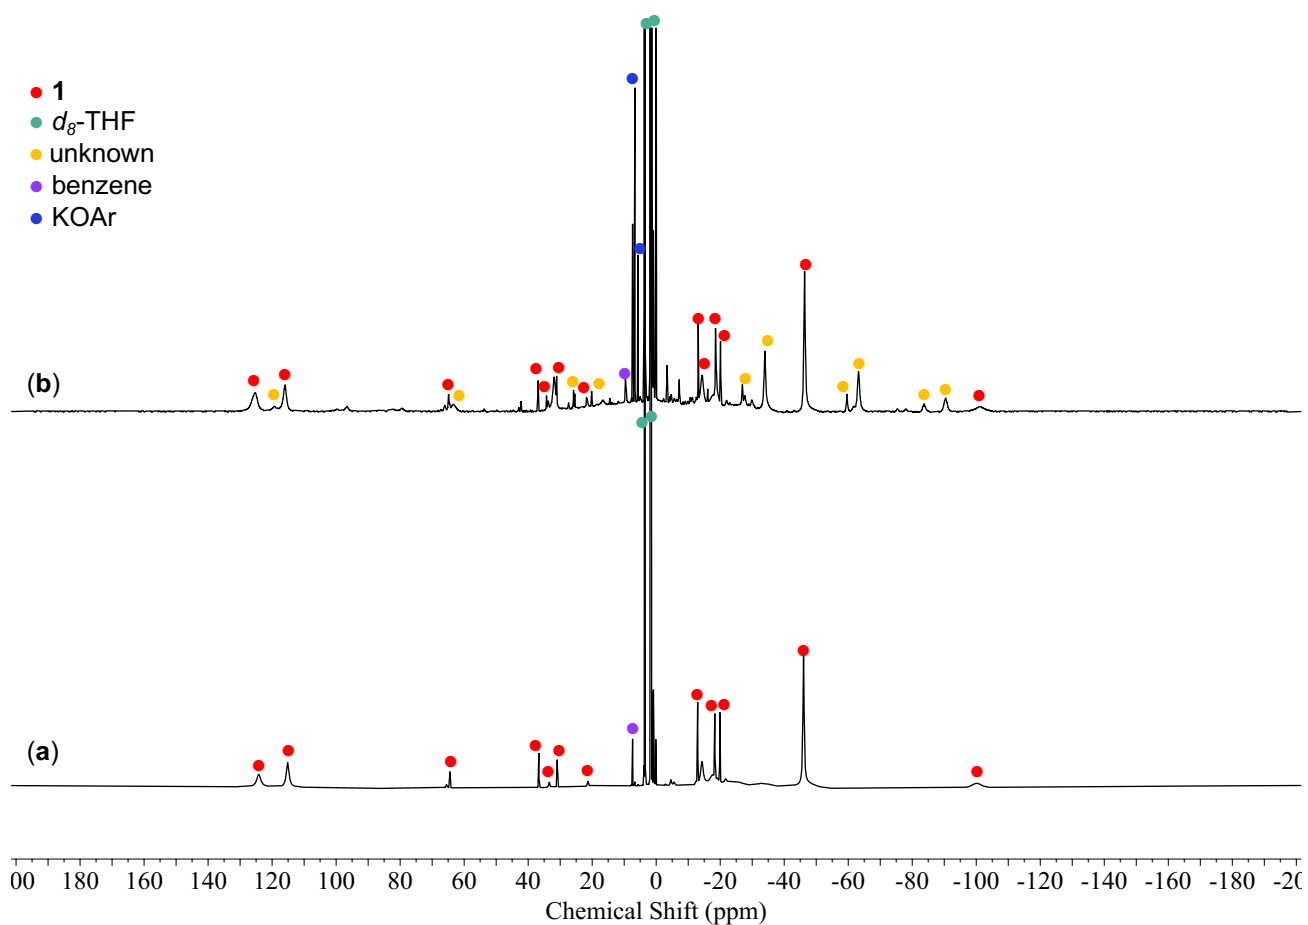

**Figure S8.**  $^1\text{H}$  NMR spectra (400 MHz,  $\text{THF-}d_8$ , 193 K) of the reaction mixture obtained after addition of 5.0 equiv. of  $\text{KC}_8$  to **1** at  $-80^\circ\text{C}$  (a) before (b) **1** and 5.0 equiv. of  $\text{KC}_8$  after 6 h.

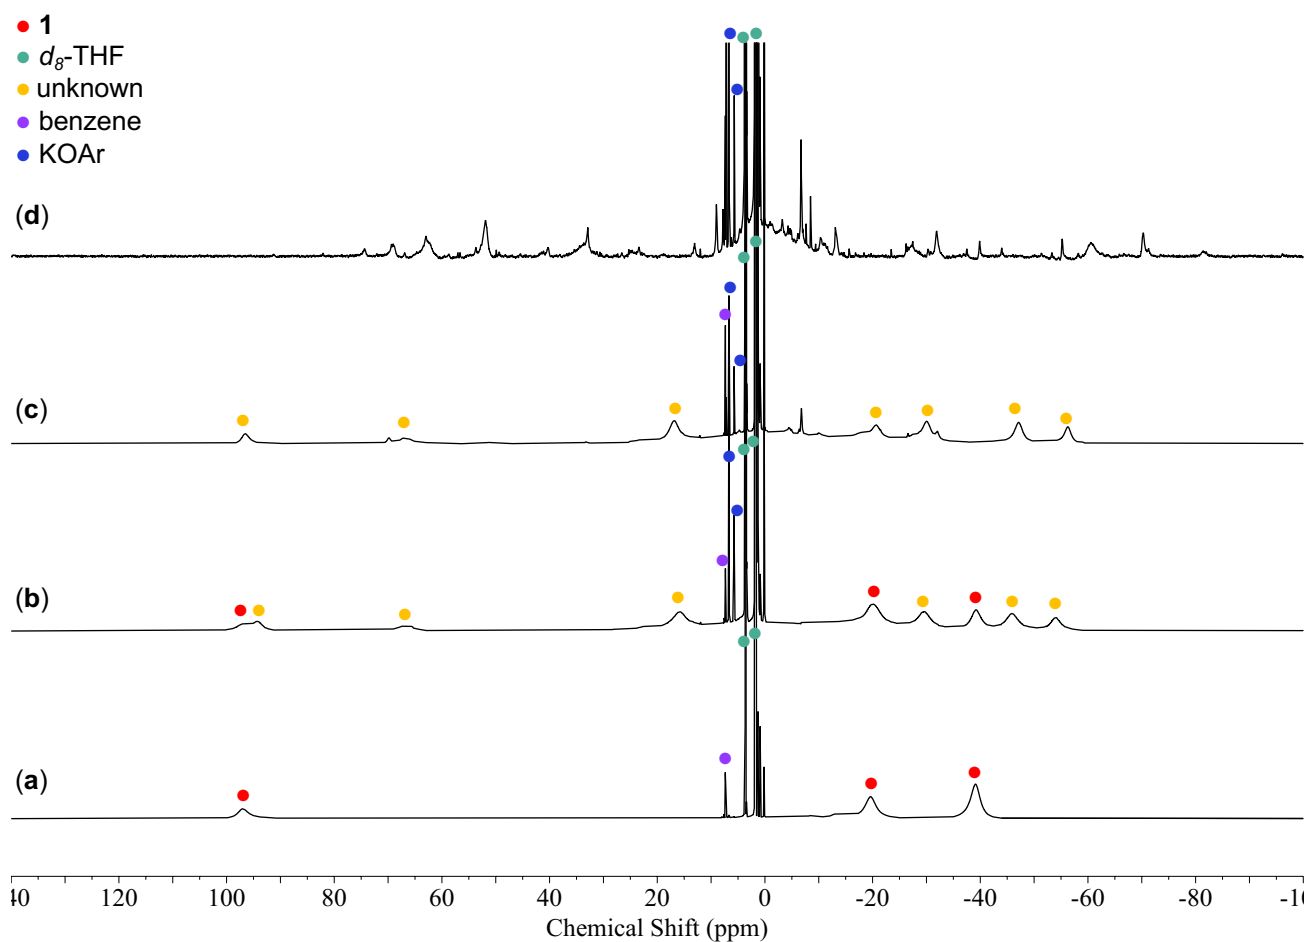

**Figure S9.**  $^1\text{H}$  NMR spectra (400 MHz,  $\text{THF-}d_8$ , 233 K) of the reaction mixture obtained after addition of 1.0-3.0 equiv. of  $\text{KC}_8$  to **1** at  $-40\text{ }^\circ\text{C}$  (a) before (b) **1** and 1.0 equiv. of  $\text{KC}_8$  after 30 mins (c) **1** and 2.0 equiv. of  $\text{KC}_8$  after 30 mins (d) **1** and 3.0 equiv. of  $\text{KC}_8$  after 30 mins.

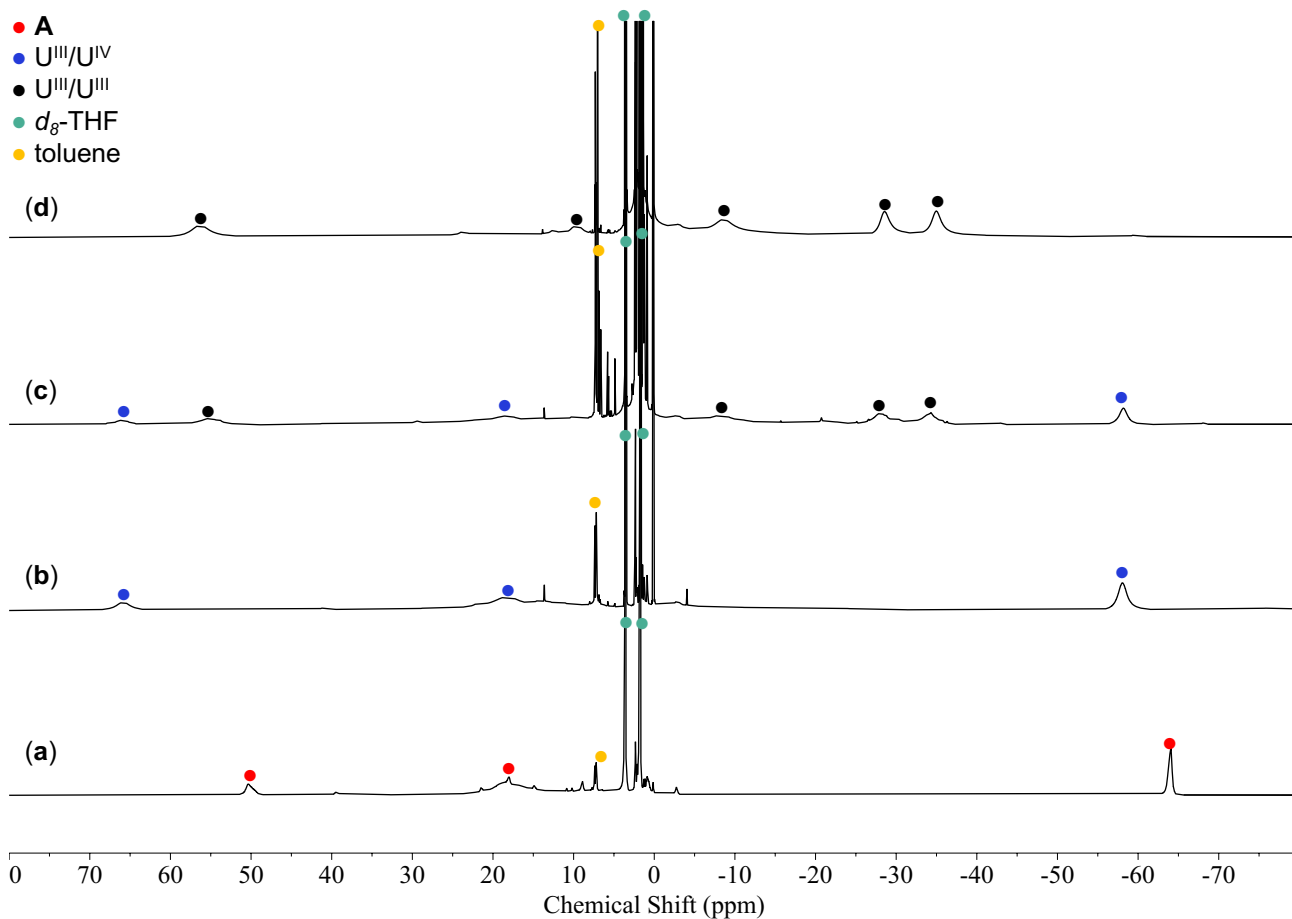

**Figure S10.**  $^1\text{H}$  NMR spectra (400 MHz,  $\text{THF-}d_8$ , 193 K) of the reaction mixture obtained after addition of 1.0-5.0 equiv. of  $\text{KC}_8$  to **A** at  $-80\text{ }^\circ\text{C}$  (a) before (b) **A** and 1.0 equiv. of  $\text{KC}_8$  after 20 mins (c) **1** and 2.0 equiv. of  $\text{KC}_8$  after 20 mins (d) **1** and 5.0 equiv. of  $\text{KC}_8$  after 20 mins ( $\text{U}^{\text{III}}/\text{U}^{\text{IV}} = [\text{K}(\text{THF})_x][(\text{U}(\text{OAr})_3)_2(\mu\text{-O})]$ ,  $\text{U}^{\text{III}}/\text{U}^{\text{III}} = [\text{K}(\text{THF})_x]_2[(\text{U}(\text{OAr})_3)_2(\mu\text{-O})]$ ).

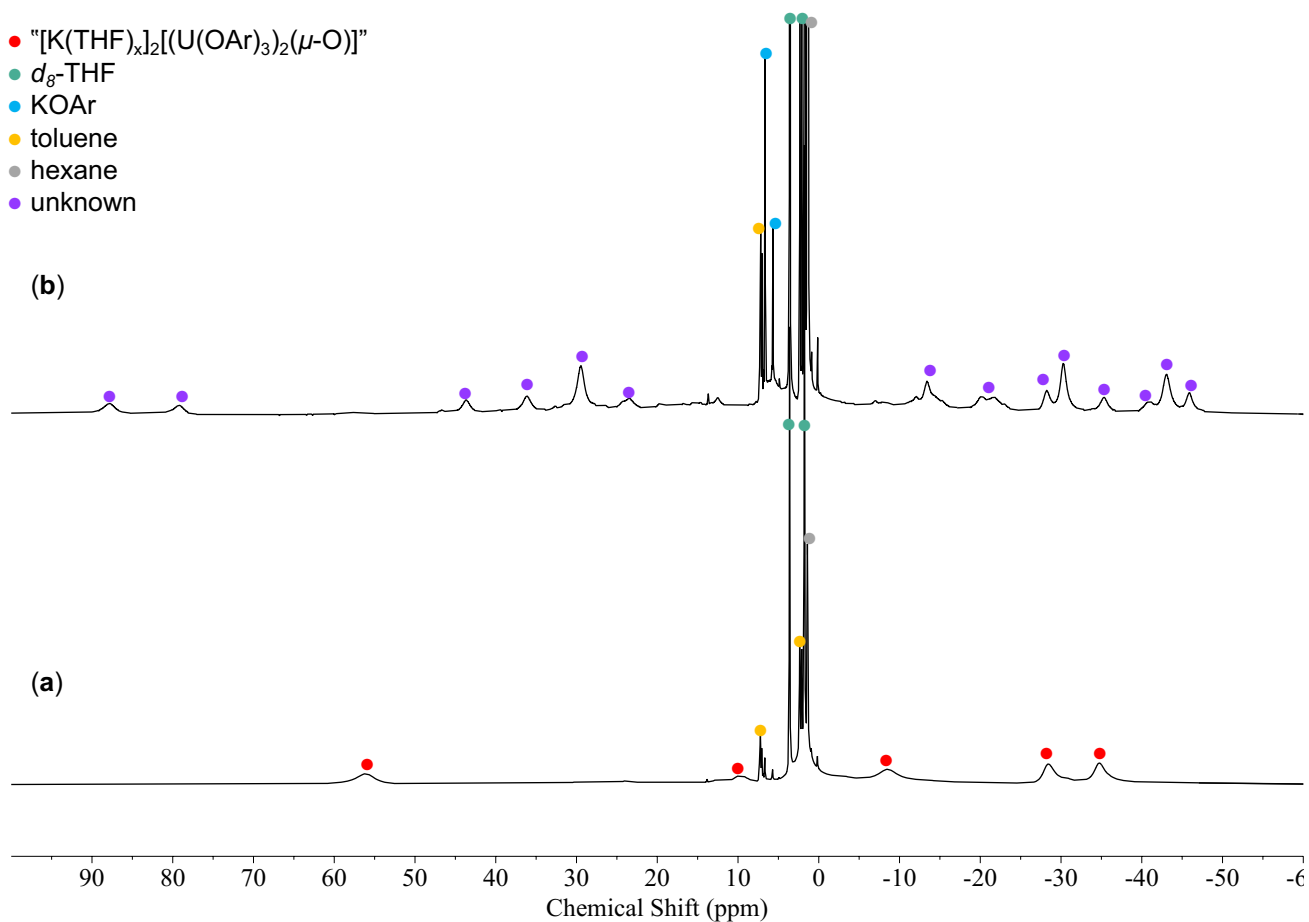

**Figure S11.** <sup>1</sup>H NMR spectra (400 MHz, THF-*d*<sub>8</sub>, 193 K) of the reaction mixture obtained after addition of 5.0 equiv. of KC<sub>8</sub> to **A** at -80 °C (a) **A** and 5.0 equiv. of KC<sub>8</sub> after 20 mins (b) **A** and 5.0 equiv. of KC<sub>8</sub> after being warmed up to -40 °C for 10 mins, and then cooled back to -80 °C, showing decomposition.

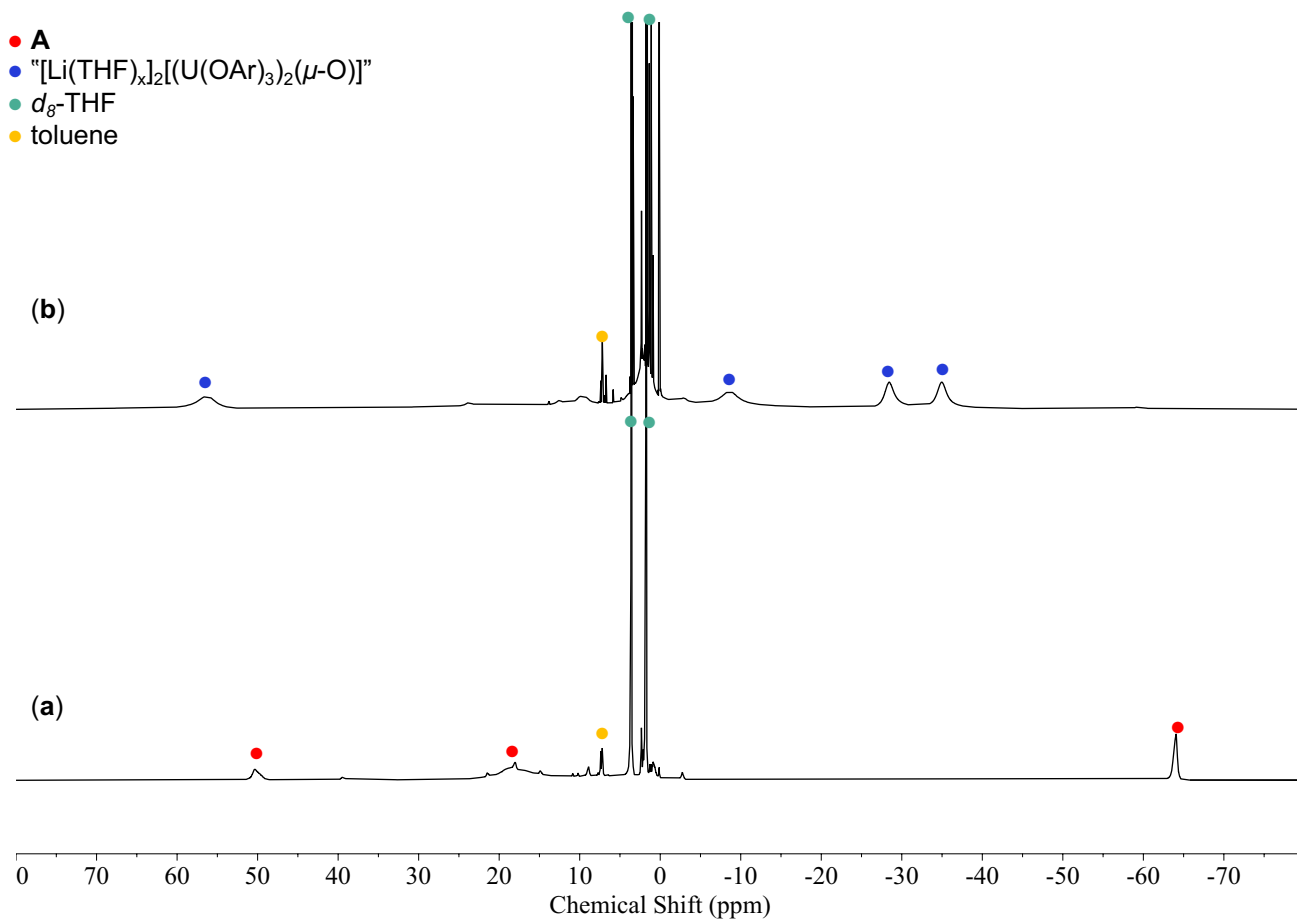

**Figure S12.** <sup>1</sup>H NMR spectra (400 MHz, THF-*d*<sub>8</sub>, 193 K) of the reaction mixture obtained after addition of 5.0 equiv. of KC<sub>8</sub> and 5.0 equiv. of LiI to **A** at -80 °C (a) before (b) **A** and 5.0 equiv. of KC<sub>8</sub> and 5.0 equiv. of LiI after 20 mins.

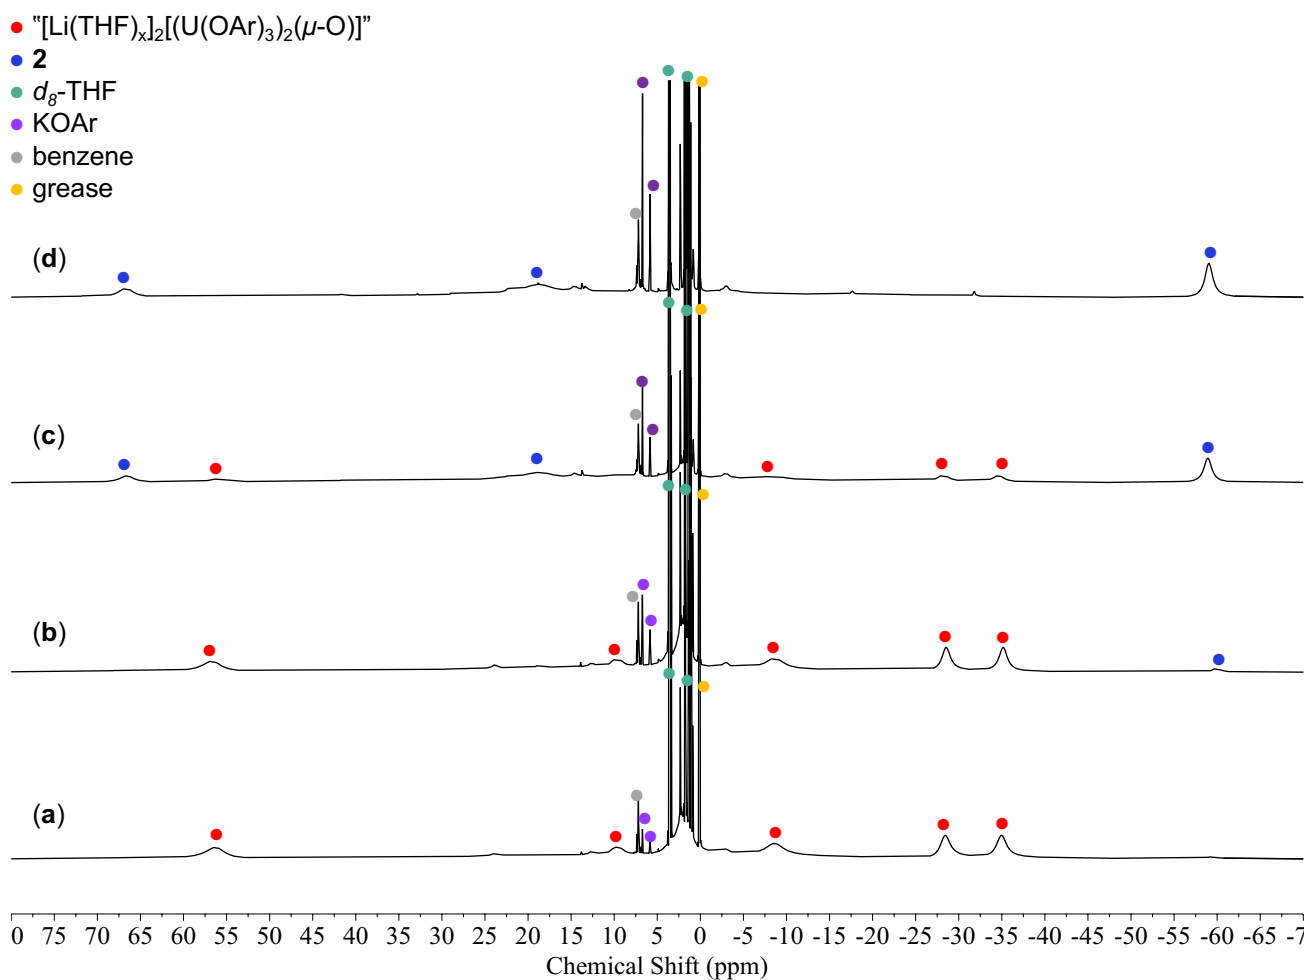

**Figure S13.** <sup>1</sup>H NMR spectra (400 MHz, THF-*d*<sub>8</sub>, 193 K) of the reaction mixture obtained after addition of 5.0 equiv. of KC<sub>8</sub> and 5.0 equiv. of Lil to **A** at -80 °C (a) **A** and 5.0 equiv. of KC<sub>8</sub> and 5.0 equiv. of Lil after 20 mins (b) **A** and 5.0 equiv. of KC<sub>8</sub> and 5.0 equiv. of Lil after being warmed up to -40 °C for 2 h (c) **A** and 5.0 equiv. of KC<sub>8</sub> and 5.0 equiv. of Lil after being warmed up to -40 °C for 4 h (d) **A** and 5.0 equiv. of KC<sub>8</sub> and 5.0 equiv. of Lil after being warmed up to -40 °C for 6 h.

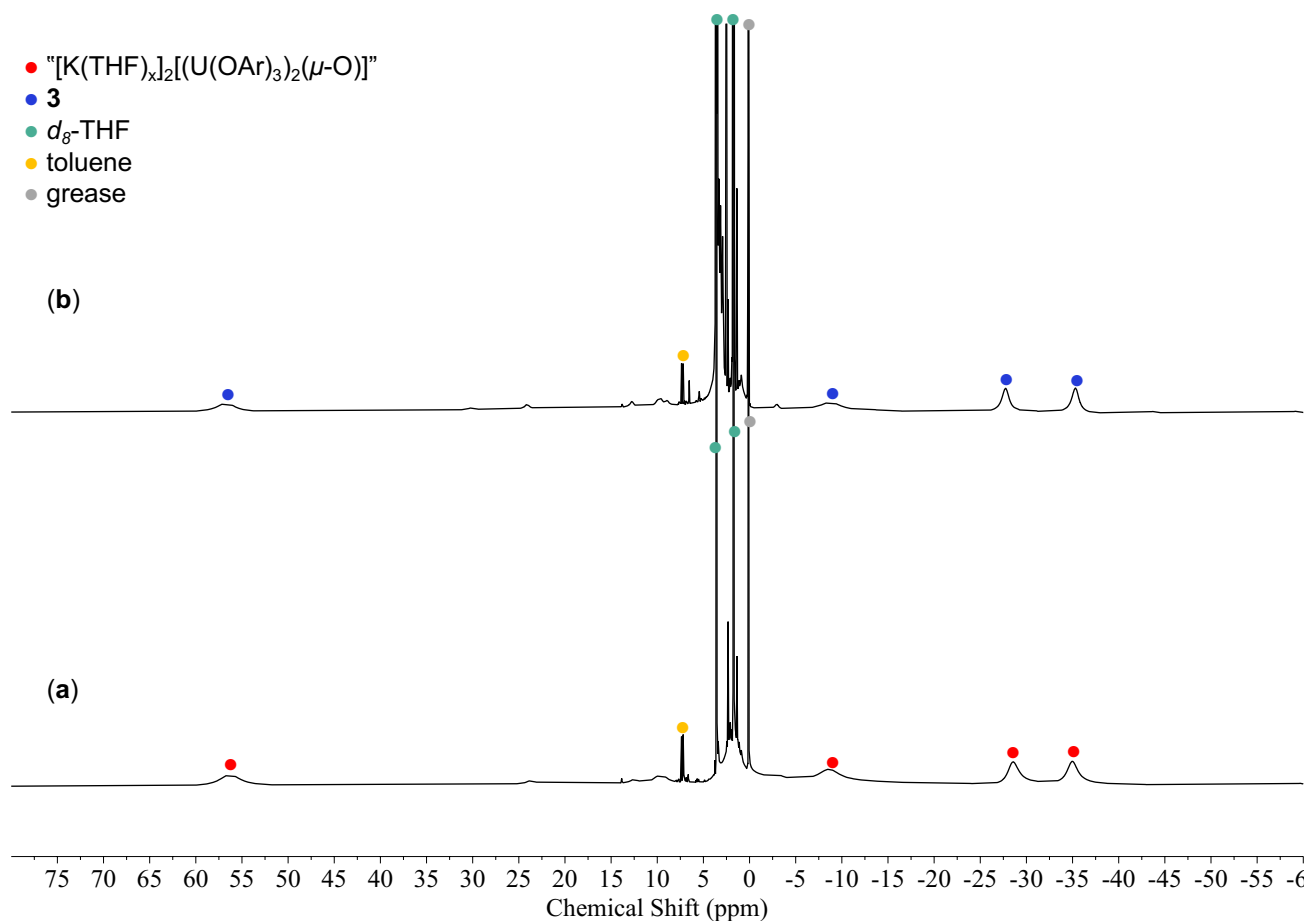

**Figure S14.** <sup>1</sup>H NMR spectra (400 MHz, THF-*d*<sub>8</sub>, 193 K) of the reaction mixture obtained after addition of 2.0 equiv. of 2.2.2-cryptand to “[K(THF)<sub>x</sub>]<sub>2</sub>[(U(OAr)<sub>3</sub>)<sub>2</sub>(μ-O)]” at -80 °C (a) before (b) “[K(THF)<sub>x</sub>]<sub>2</sub>[(U(OAr)<sub>3</sub>)<sub>2</sub>(μ-O)]” and 2.0 equiv. of 2.2.2-cryptand immediately, showing the presence of complex **3**.

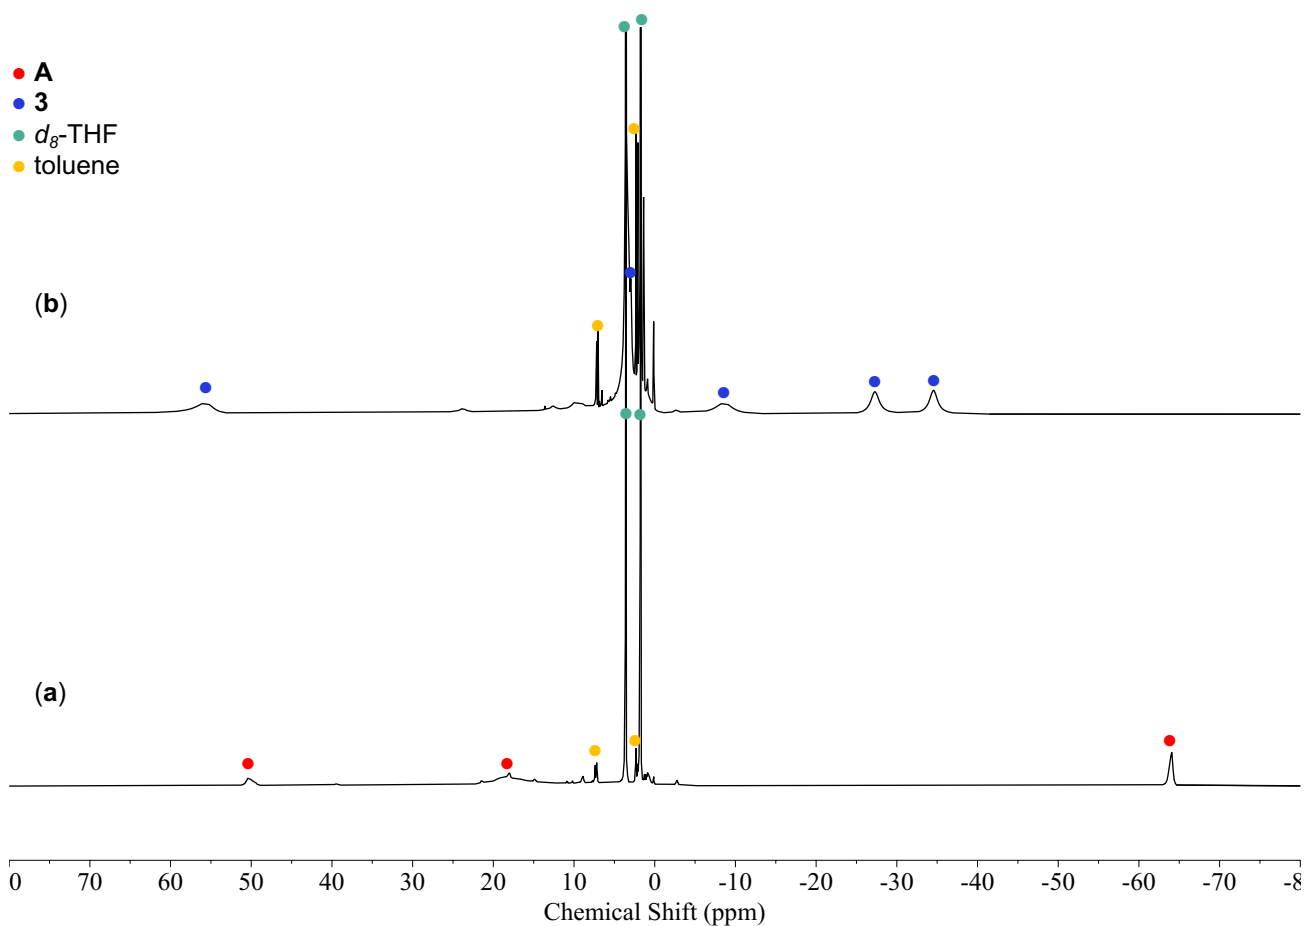

**Figure S15.**  $^1\text{H}$  NMR spectra (400 MHz,  $\text{THF-}d_8$ , 193 K) of the reaction mixture obtained after addition of 5.0 equiv. of  $\text{KC}_8$  and 2.0 equiv. of 2.2.2-cryptand to **A** at  $-80^\circ\text{C}$  (a) before (b) **A** and 5.0 equiv. of  $\text{KC}_8$  and 2.0 equiv. of 2.2.2-cryptand after 20 mins, showing the presence of complex **3**.



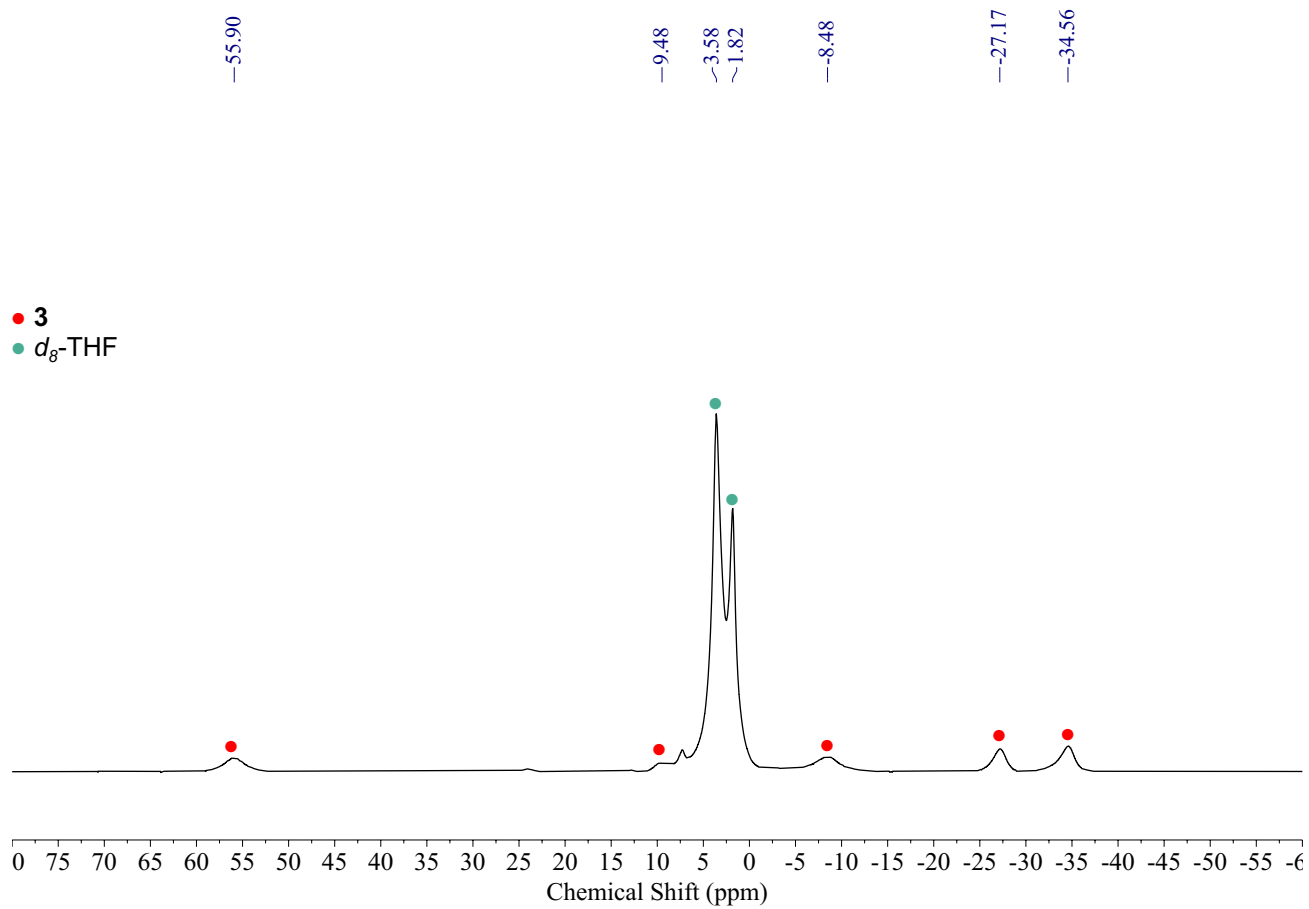

**Figure S16.**  $^1\text{H}$  NMR spectrum (400 MHz,  $\text{THF-}d_8$ , 193 K) of isolated **3**.

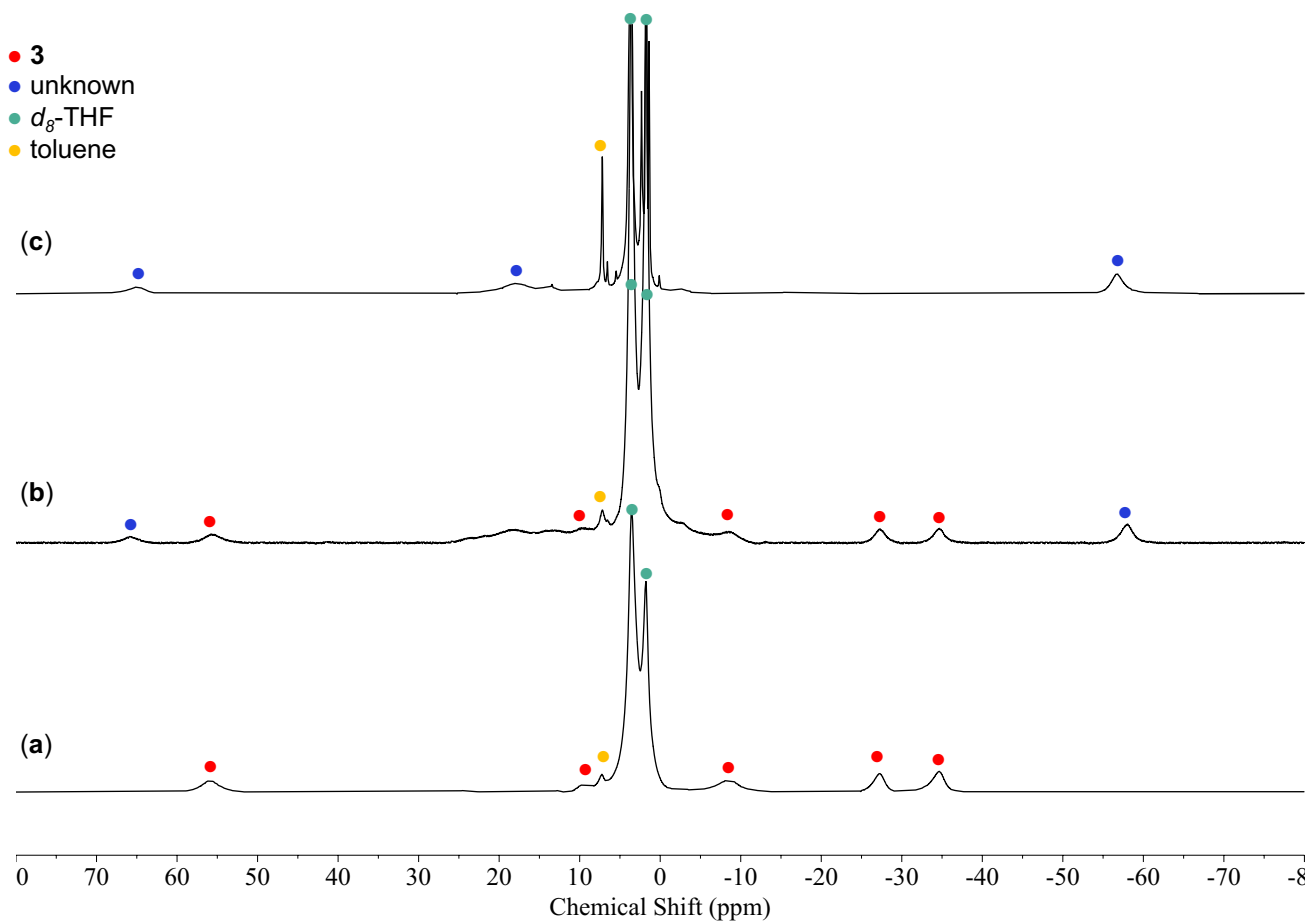

**Figure S17.**  $^1\text{H}$  NMR spectra (400 MHz,  $\text{THF-}d_8$ , 193 K) of the isolated **3** at  $-80\text{ }^\circ\text{C}$  (a) before (b) **3** after being warmed up to  $-40\text{ }^\circ\text{C}$  for 3 h (c) **3** after being warmed up to  $-40\text{ }^\circ\text{C}$  for 6 h.

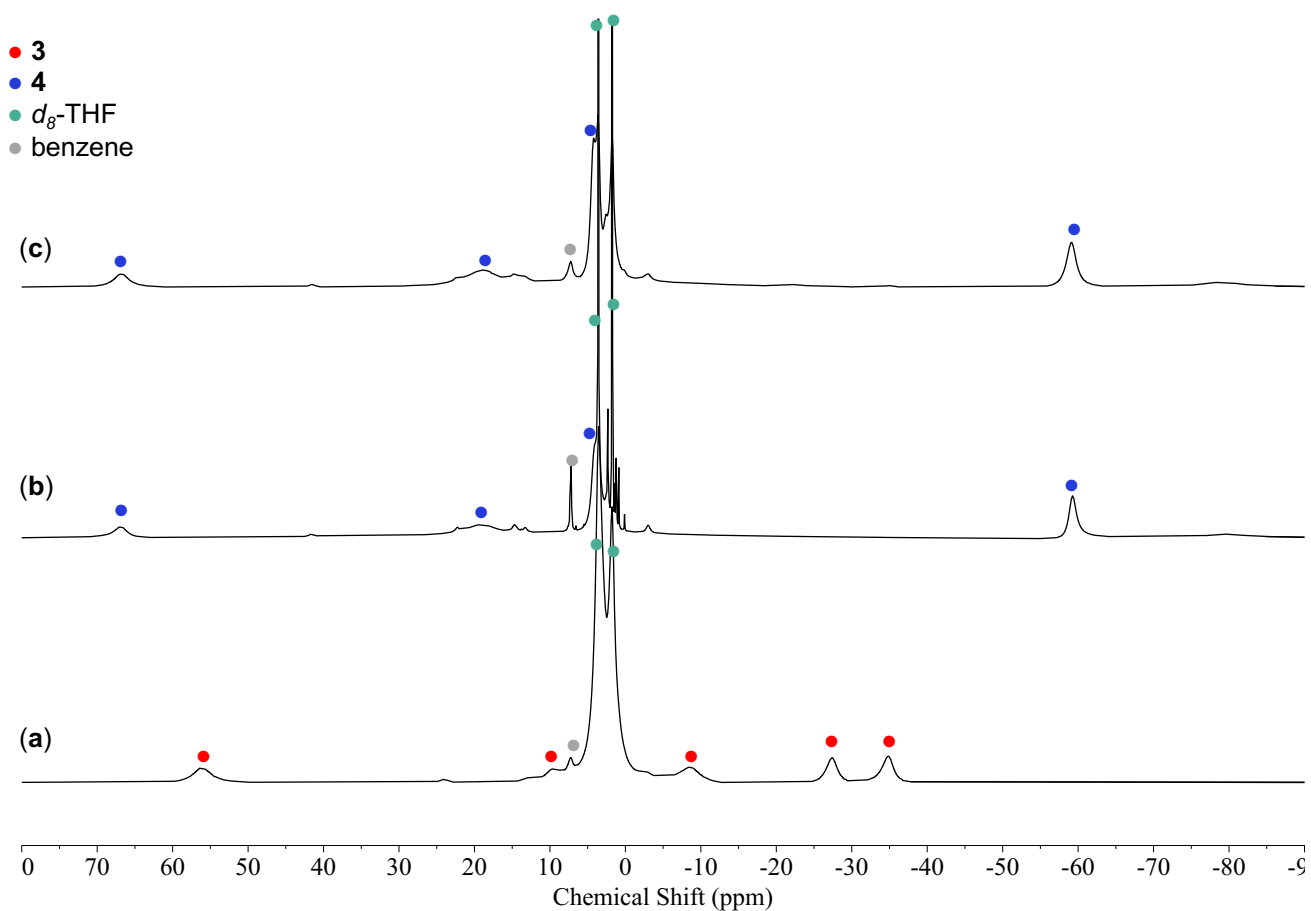

**Figure S18.**  $^1\text{H}$  NMR spectra (400 MHz,  $\text{THF-}d_8$ , 193 K) of the reaction mixture obtained after addition of 1.0 equiv. of PhNNPh to **3** at  $-80\text{ }^\circ\text{C}$  (a) before (b) **3** and 1.0 equiv. of PhNNPh immediately (c) **A** and 1.0 equiv. of  $\text{KC}_8$  and 1.0 equiv. of 2.2.2-cryptand after 20 mins.

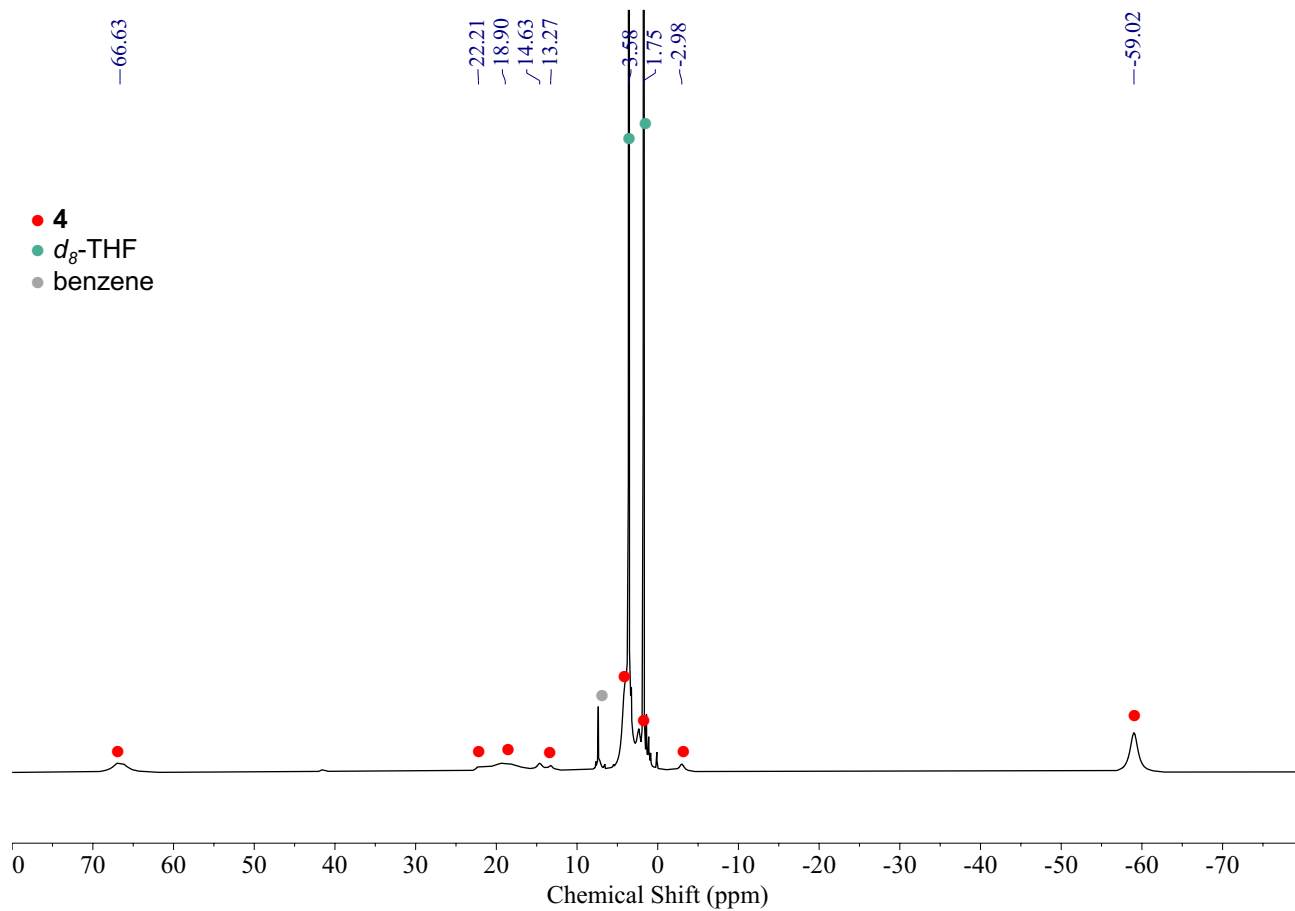

**Figure S19.**  $^1\text{H}$  NMR spectrum (400 MHz,  $\text{THF-}d_8$ , 193 K) of isolated **4** ·  $[\text{K}(2.2.2\text{-cryptand})(\text{THF})][\text{PhNNPh}]$ .

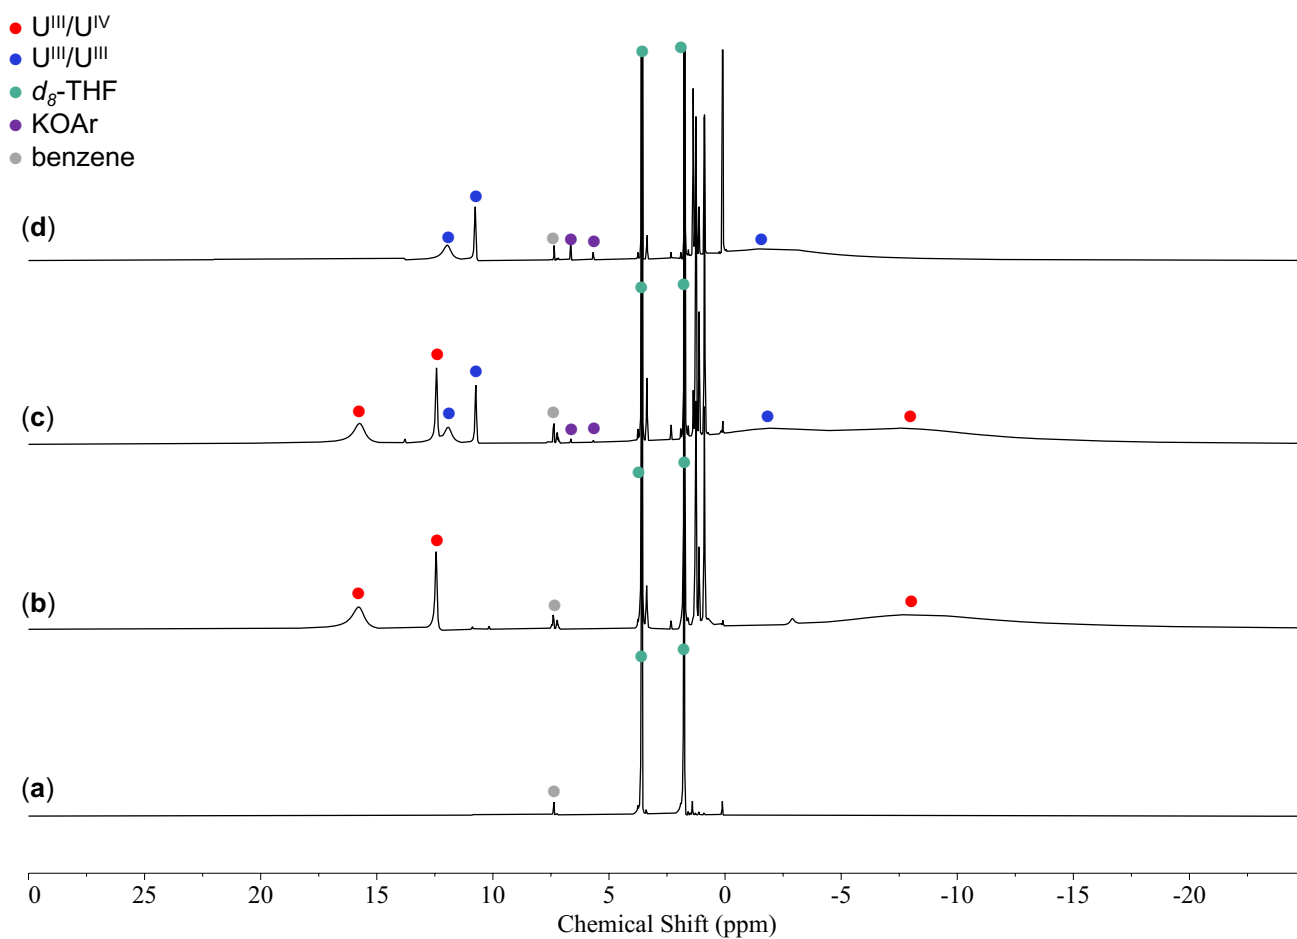

**Figure S20.**  $^1\text{H}$  NMR spectra (400 MHz,  $\text{THF-}d_8$ , 193 K) of the reaction mixture obtained after addition of 1.0-5.0 equiv. of  $\text{KC}_8$  to **B** at  $-80\text{ }^\circ\text{C}$  (a) before (NMR silent) (b) **B** and 1.0 equiv. of  $\text{KC}_8$  after 20 mins (c) **B** and 2.0 equiv. of  $\text{KC}_8$  after 20 mins (d) **B** and 5.0 equiv. of  $\text{KC}_8$  after 20 mins ( $\text{U}^{\text{III}}/\text{U}^{\text{IV}} = [\text{K}(\text{THF})_x][(\text{U}(\text{OAr})_3)_2(\mu\text{-S})]$  and  $\text{U}^{\text{III}}/\text{U}^{\text{III}} = [\text{K}(\text{THF})_x]_2[(\text{U}(\text{OAr})_3)_2(\mu\text{-S})]$ ).

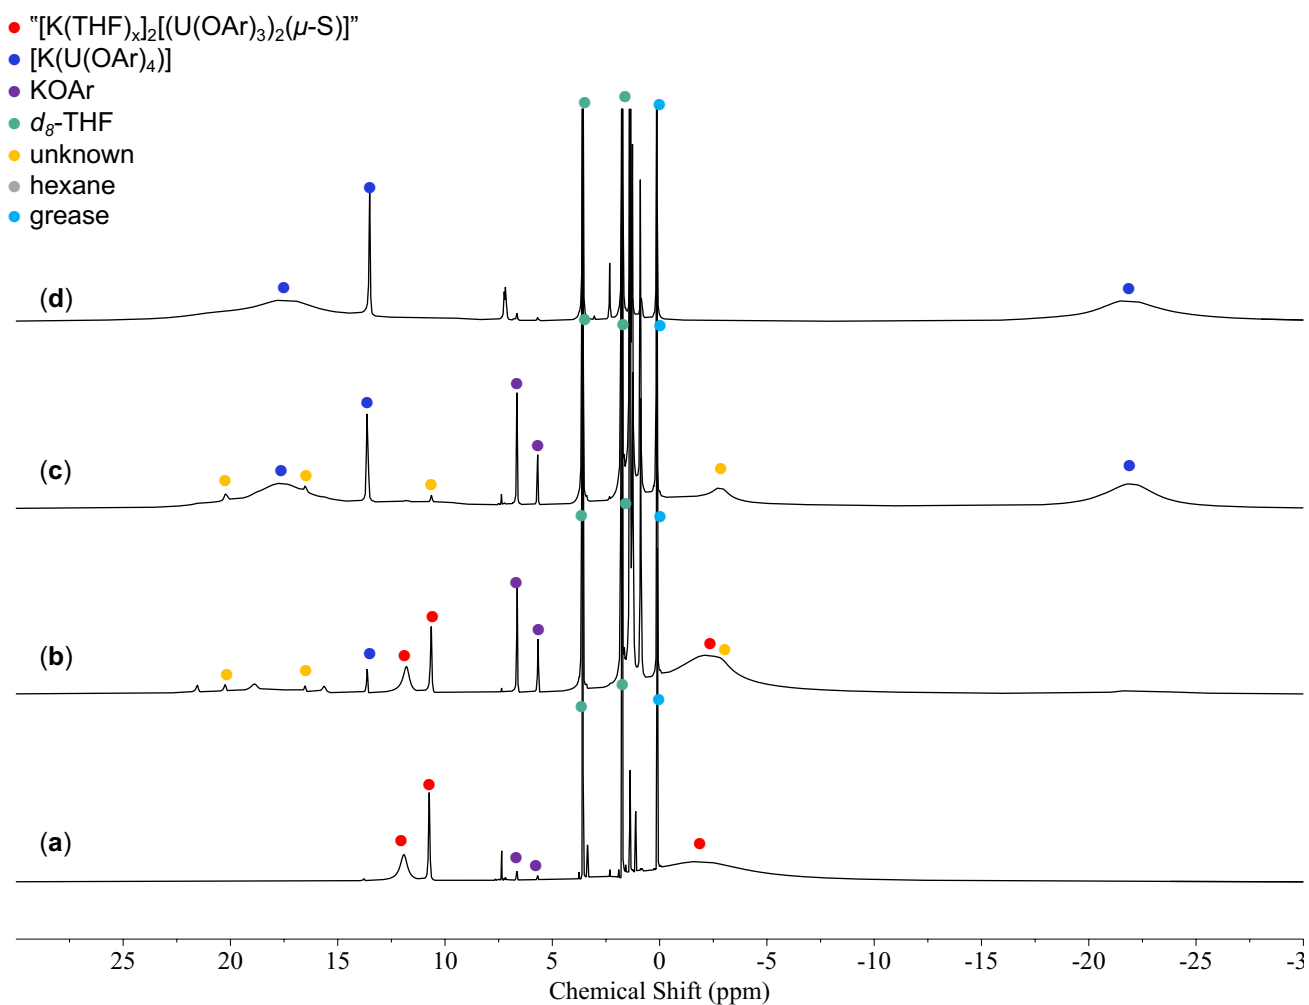

**Figure S21.**  $^1\text{H}$  NMR spectra (400 MHz,  $\text{THF-}d_8$ , 193 K) of the reaction mixture obtained after addition of 5.0 equiv. of  $\text{KC}_8$  to **B** at  $-80\text{ }^\circ\text{C}$  (a) **B** and 5.0 equiv. of  $\text{KC}_8$  after 20 mins at  $-80\text{ }^\circ\text{C}$  (b) **B** and 5.0 equiv. of  $\text{KC}_8$  after being warmed up to  $-40\text{ }^\circ\text{C}$  for 1 week (c) **B** and 5.0 equiv. of  $\text{KC}_8$  after being warmed up to  $-40\text{ }^\circ\text{C}$  for 3 weeks (d)  $[\text{U}(\text{OAr})_4]$  and 1.2 equiv. of  $\text{KC}_8$  after 20 mins, yielded  $[\text{KU}(\text{OAr})_4]$ .

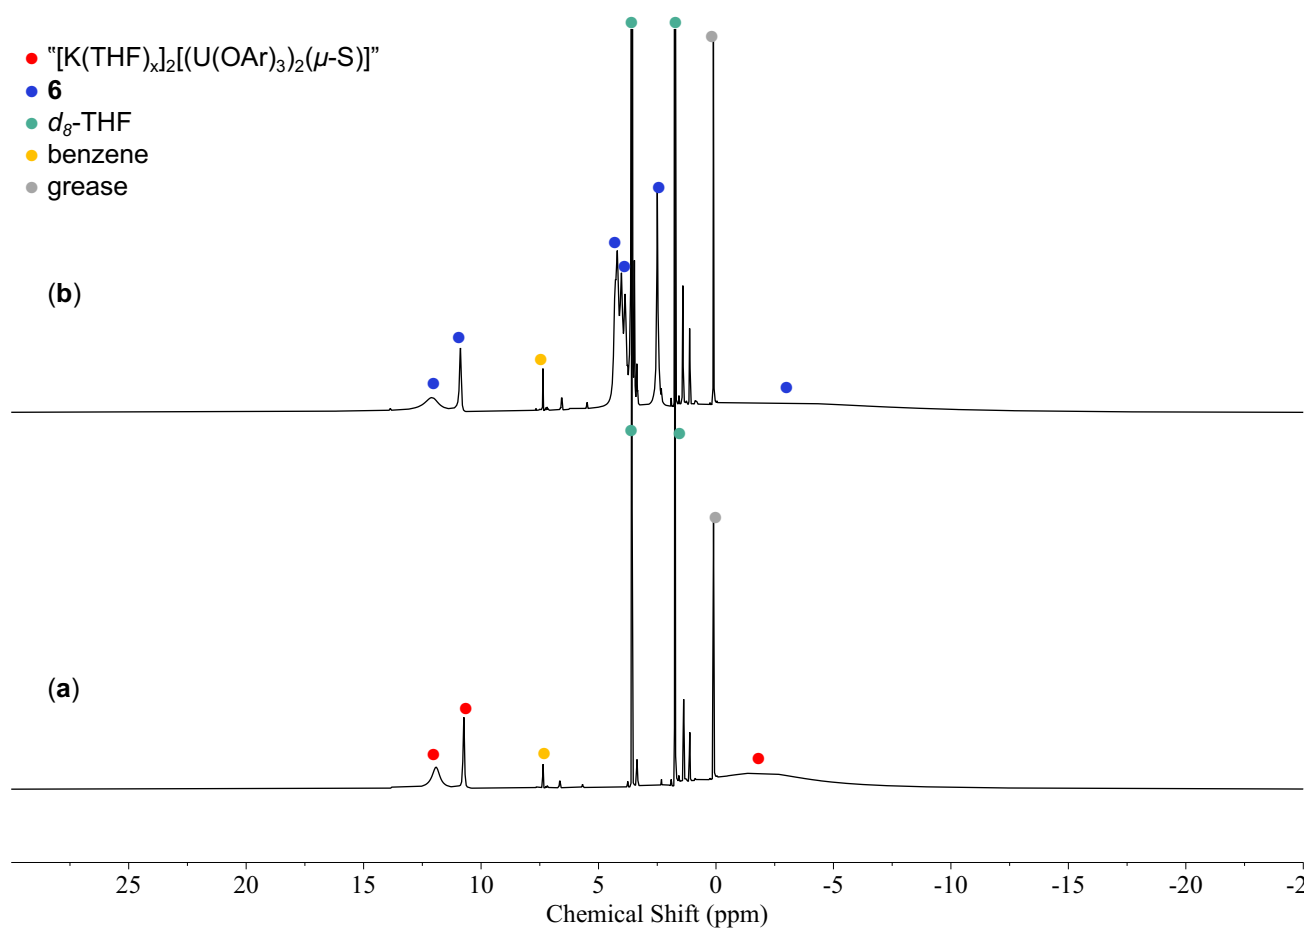

**Figure S22.** <sup>1</sup>H NMR spectra (400 MHz, THF-*d*<sub>8</sub>, 193 K) of the reaction mixture obtained after addition of 2.0 equiv. of 2.2.2-cryptand to “[K(THF)<sub>x</sub>]<sub>2</sub>[(U(OAr)<sub>3</sub>)<sub>2</sub>(μ-S)]” at -80 °C (a) before (b) “[K(THF)<sub>x</sub>]<sub>2</sub>[(U(OAr)<sub>3</sub>)<sub>2</sub>(μ-S)]” and 2.0 equiv. of 2.2.2-cryptand immediately, showing the presence of complex **6**.

- **6**
- $d_8$ -THF
- benzene

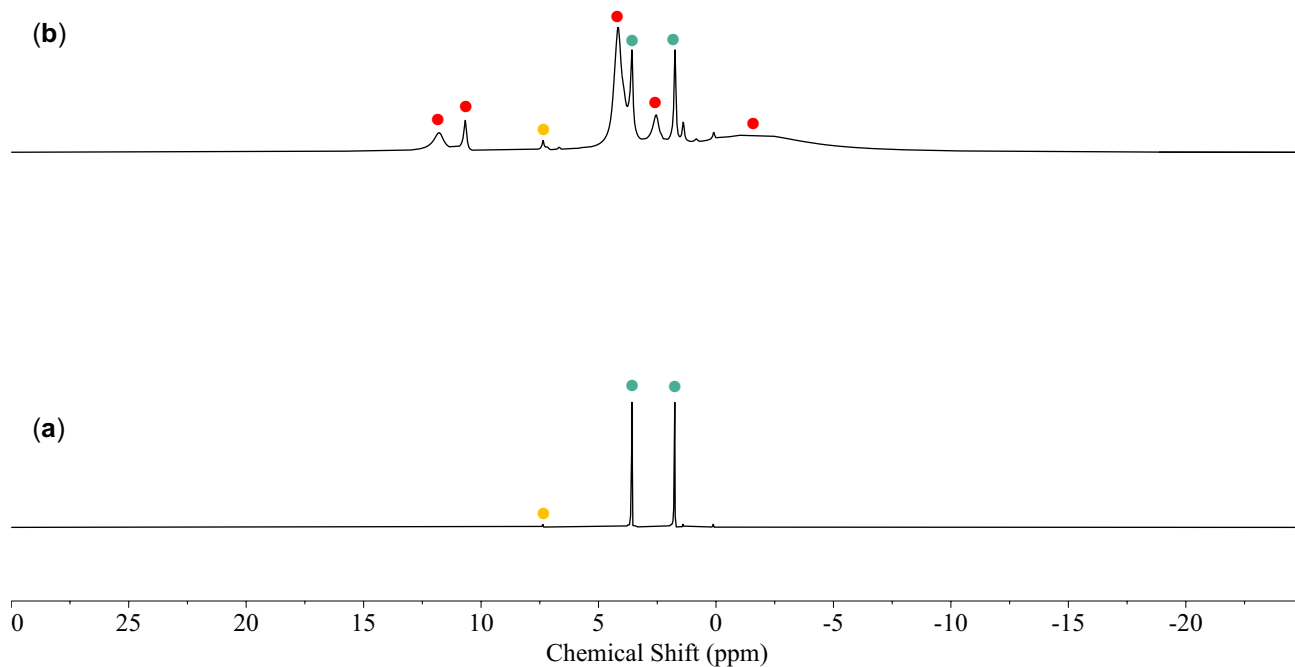

**Figure S23.**  $^1\text{H}$  NMR spectra (400 MHz,  $\text{THF-}d_8$ , 193 K) of the reaction mixture obtained after addition of 5.0 equiv. of  $\text{KC}_8$  and 2.0 equiv. of 2.2.2-cryptand to **B** at  $-80^\circ\text{C}$  (a) before (NMR silent) (b) **B** and 5.0 equiv. of  $\text{KC}_8$  and 2.0 equiv. of 2.2.2-cryptand after 20 mins, showing the presence of complex **6**.



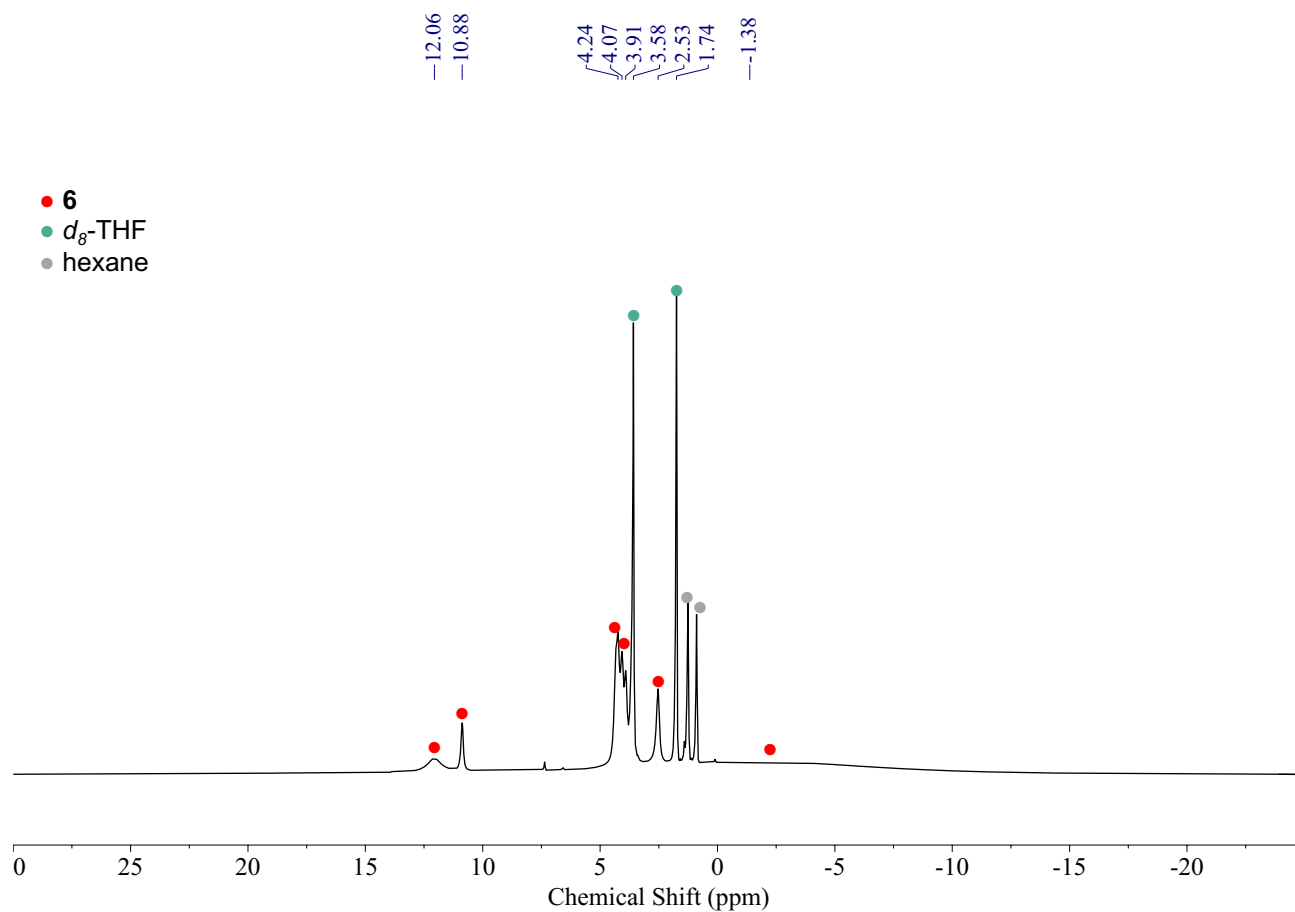

**Figure S24.**  $^1\text{H}$  NMR spectrum (400 MHz,  $\text{THF-d}_8$ , 193 K) of isolated **6**.

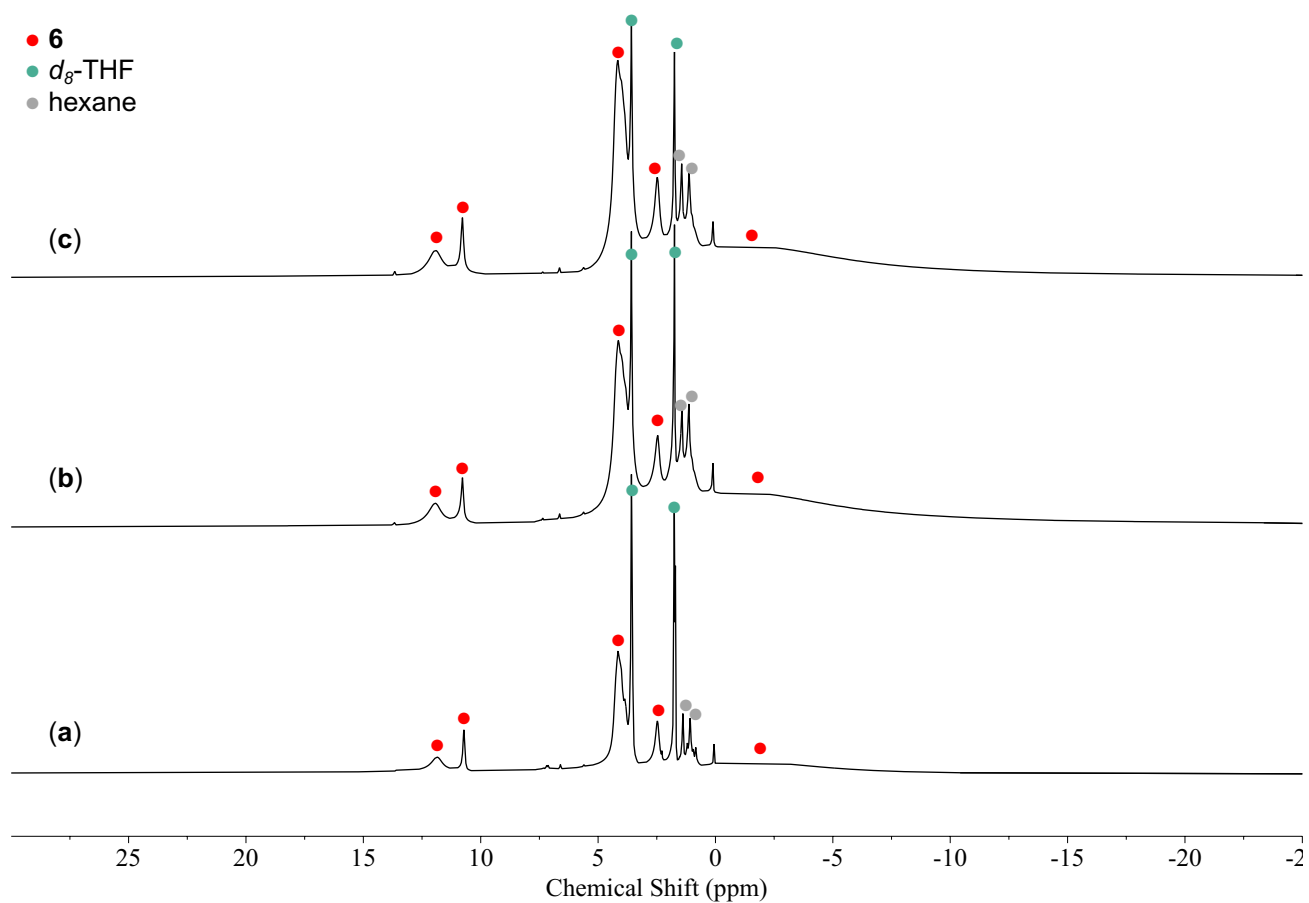

**Figure S25.** <sup>1</sup>H NMR spectra (400 MHz, THF-*d*<sub>8</sub>, 193 K) of the isolated **6** (a) before (b) **3** after being warmed up to -40 °C for 3 days (c) **3** after being warmed up to -40 °C for 1 week.

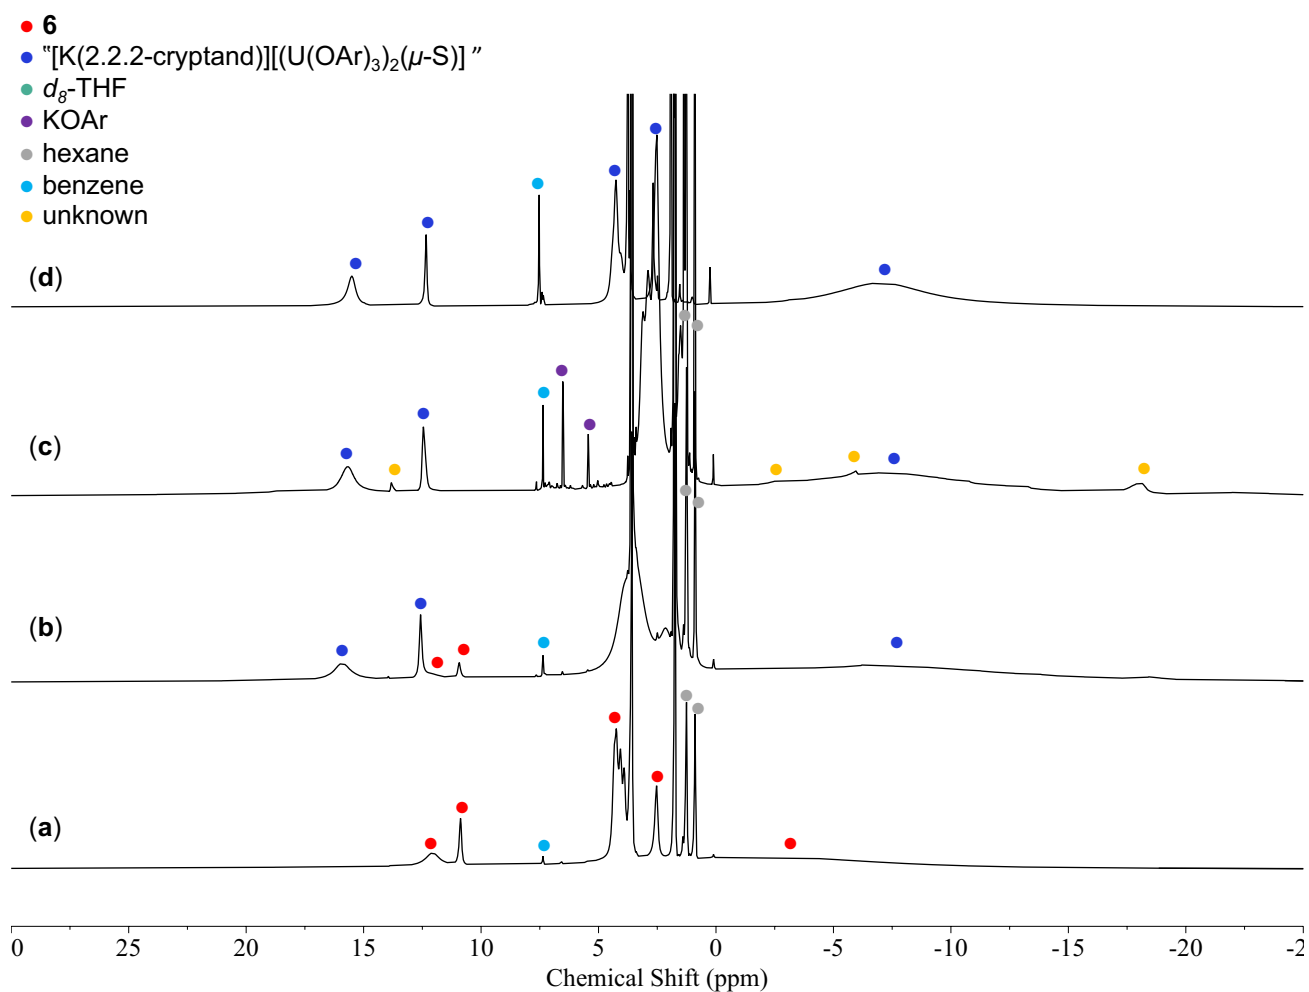

**Figure S26.** <sup>1</sup>H NMR spectra (400 MHz, THF-*d*<sub>8</sub>, 193 K) of the reaction mixture obtained after addition of 1.0 equiv. of PhNNPh to **6** at -80 °C (a) before (b) **3** and 1.0 equiv. of PhNNPh immediately (c) **6** and 1.0 equiv. of PhNNPh after being warmed up to -40 °C for 1 h (d) **B** and 1.0 equiv. of KC<sub>8</sub> and 1.0 equiv. of 2.2.2-cryptand after 20 mins.

#### S4. Electrochemistry Data

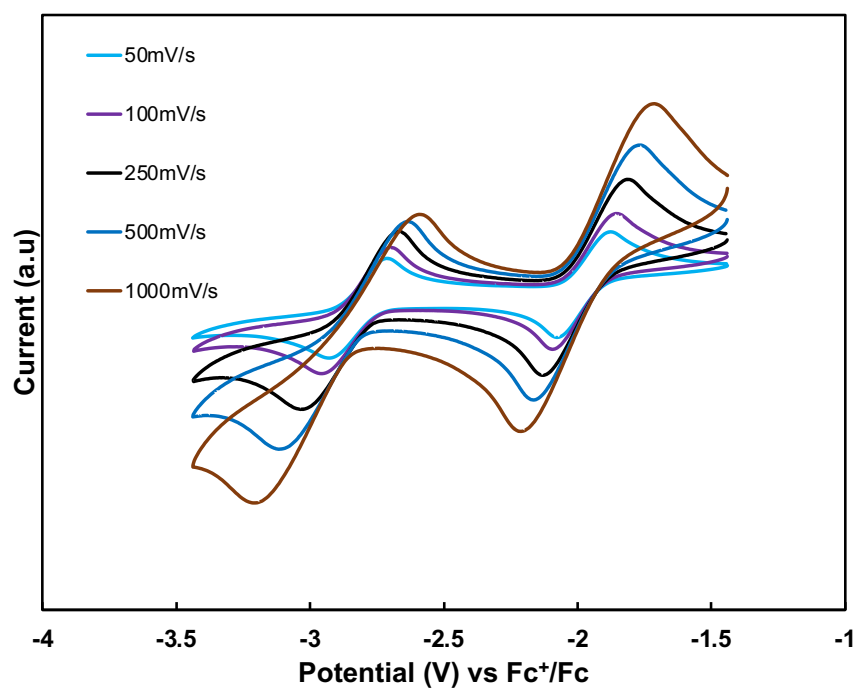

Figure S27. Cyclic voltammogram of **A** in THF at room temperature with varying scan rates.

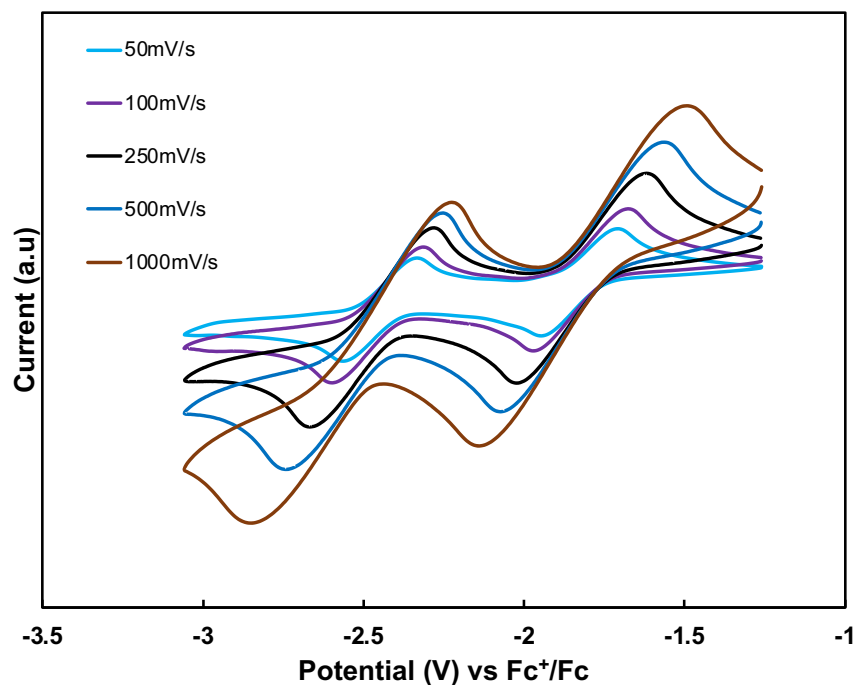

Figure S28. Cyclic voltammogram of **B** in THF at room temperature with varying scan rates.

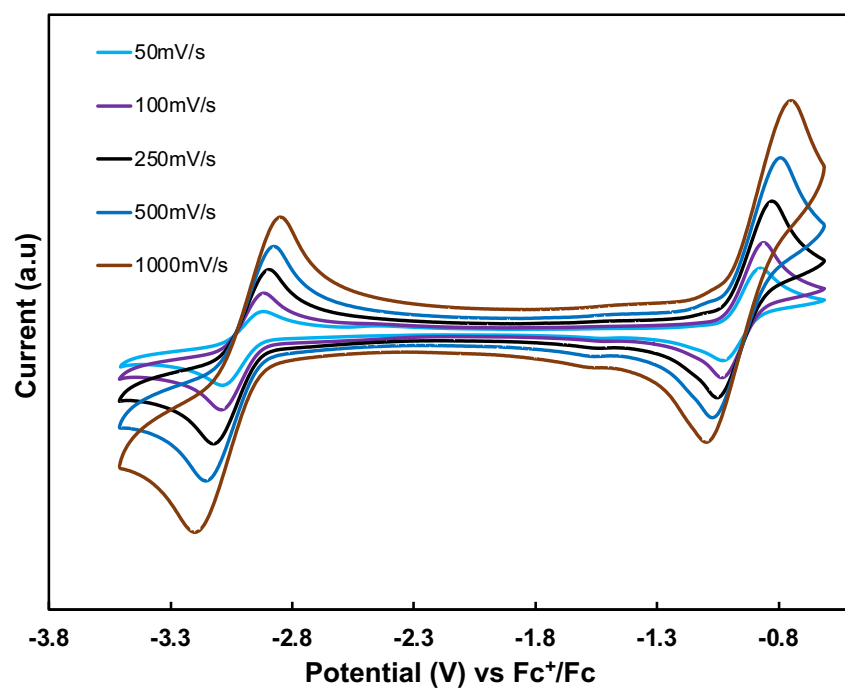

**Figure S29.** Cyclic voltammogram of **1** in THF at room temperature with varying scan rates.

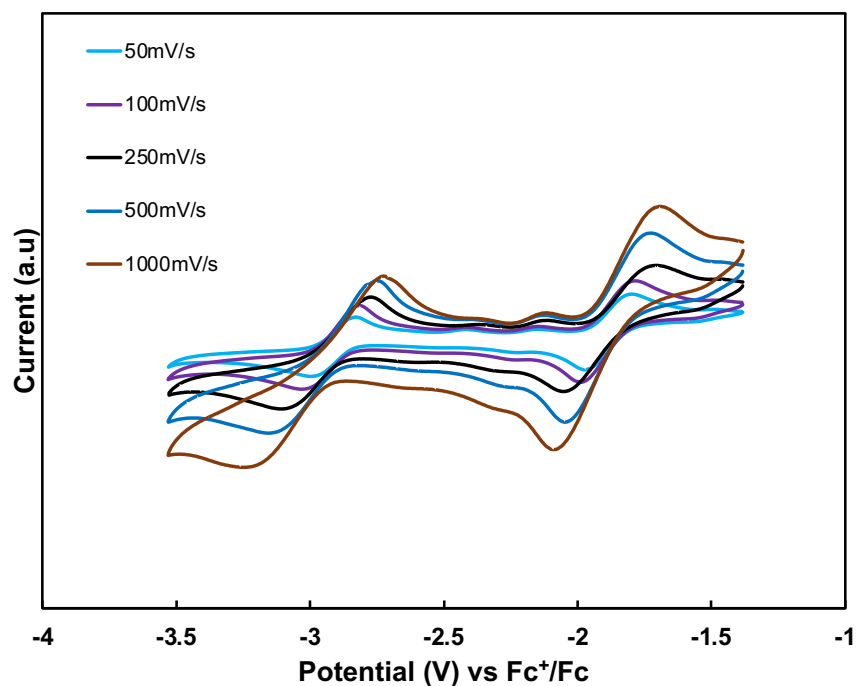

**Figure S30.** Cyclic voltammogram of  $[(U(N(SiMe_3)_2)_3)_2(\mu-O)]$  in THF at room temperature with varying scan rates.

## S5. SQUID Magnetometry Data

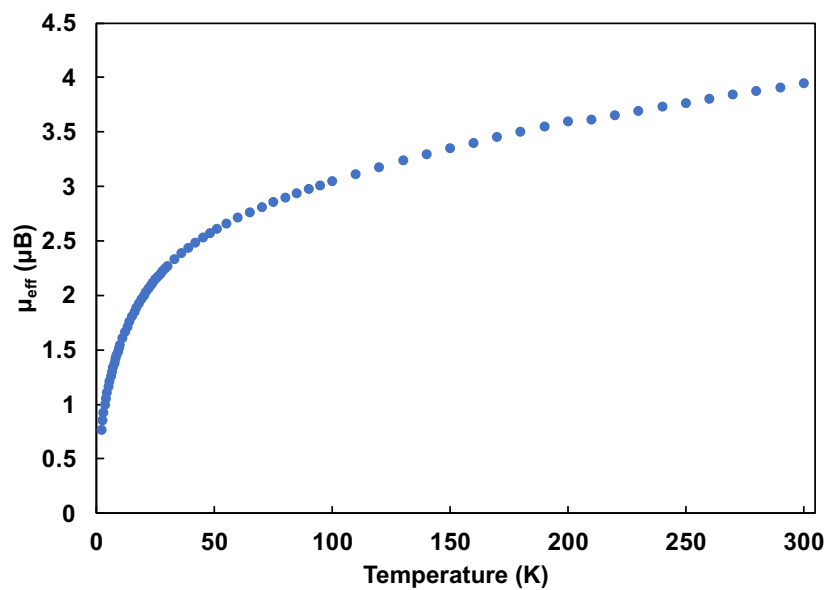

**Figure S31.** Plot of  $\mu_{\text{eff}}$  per ion versus T data for **A** under an applied field of 1 T.

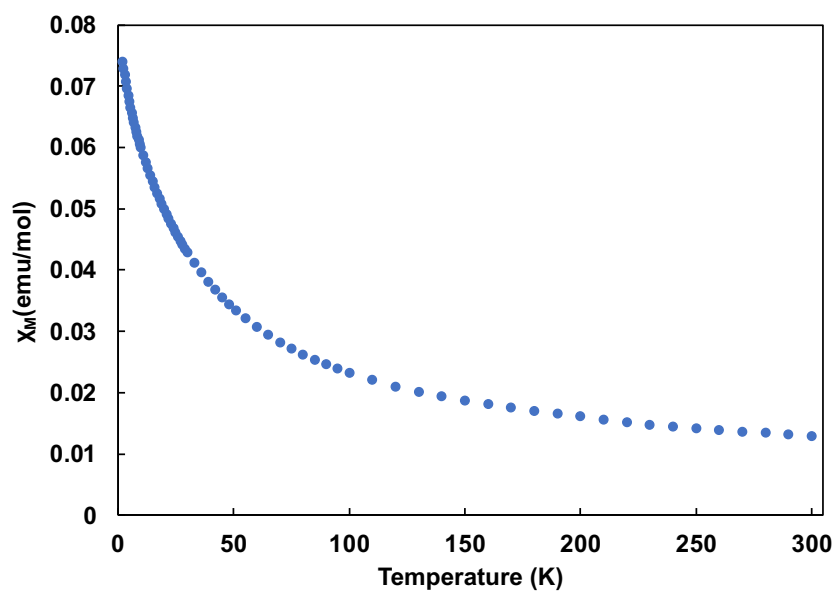

**Figure S32.** Plot of  $\chi_M$  versus temperature data for **A** under an applied field of 1 T.

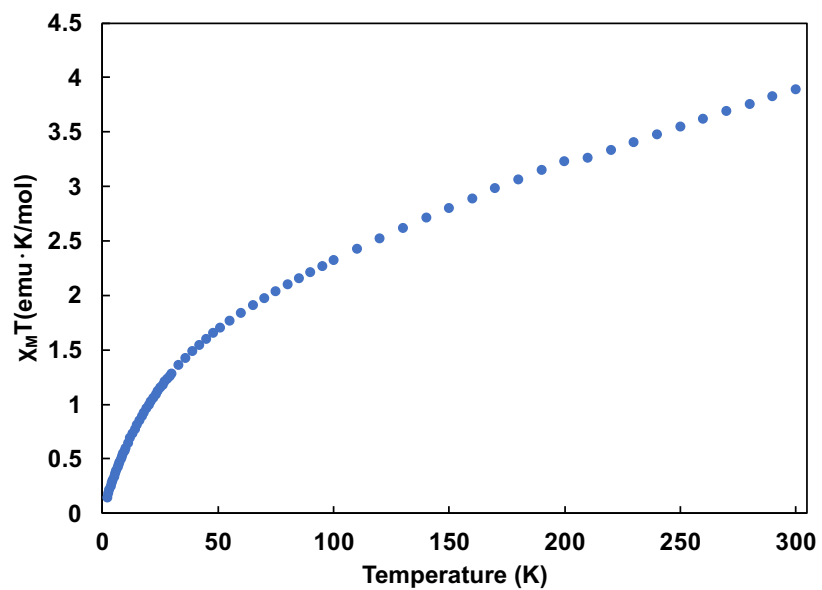

**Figure S33.** Plot of  $\chi_M T$  versus temperature data for **A** under an applied field of 1 T.

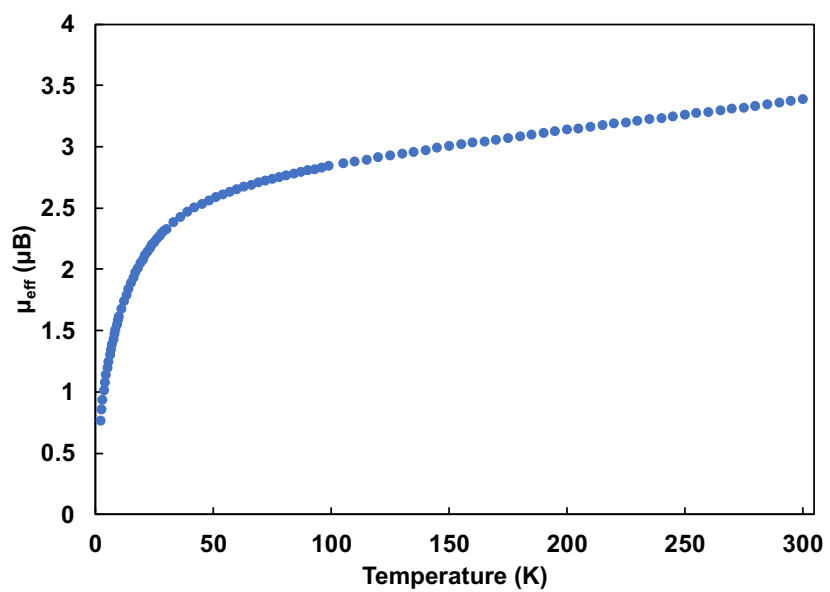

**Figure S34.** Plot of  $\mu_{\text{eff}}$  per ion versus T data for **B** under an applied field of 1 T.

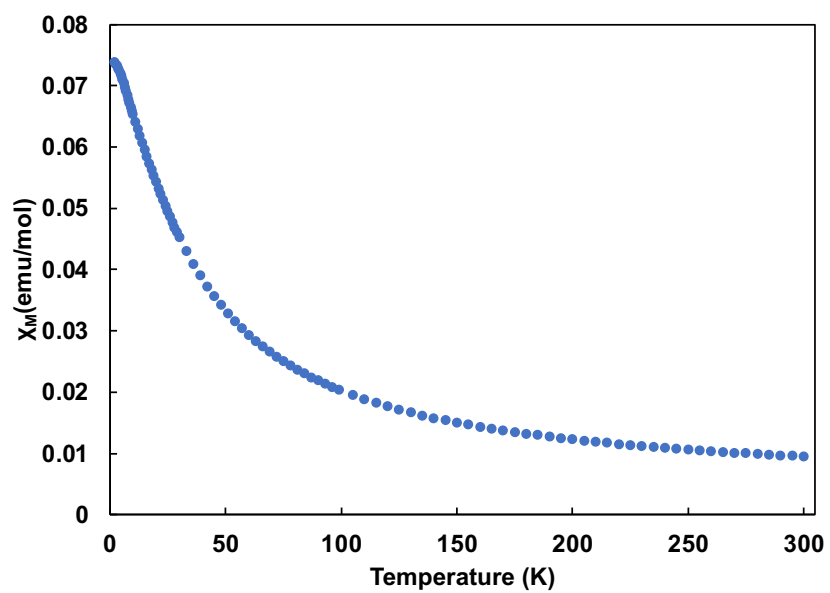

Figure S35. Plot of  $\chi_M$  versus temperature data for **B** under an applied field of 1 T.

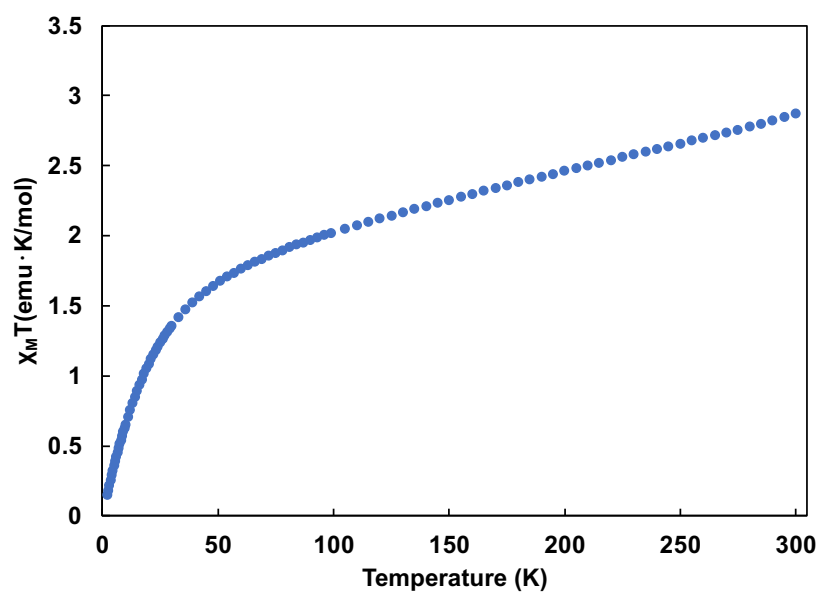

Figure S36. Plot of  $\chi_M T$  versus temperature data for **B** under an applied field of 1 T.



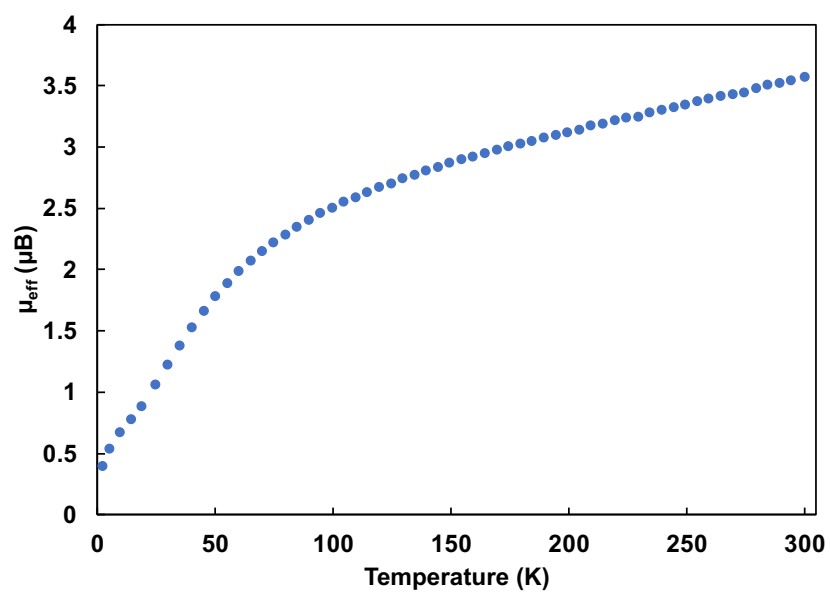

**Figure S37.** Plot of  $\mu_{\text{eff}}$  per ion versus T data for **1** under an applied field of 1 T.

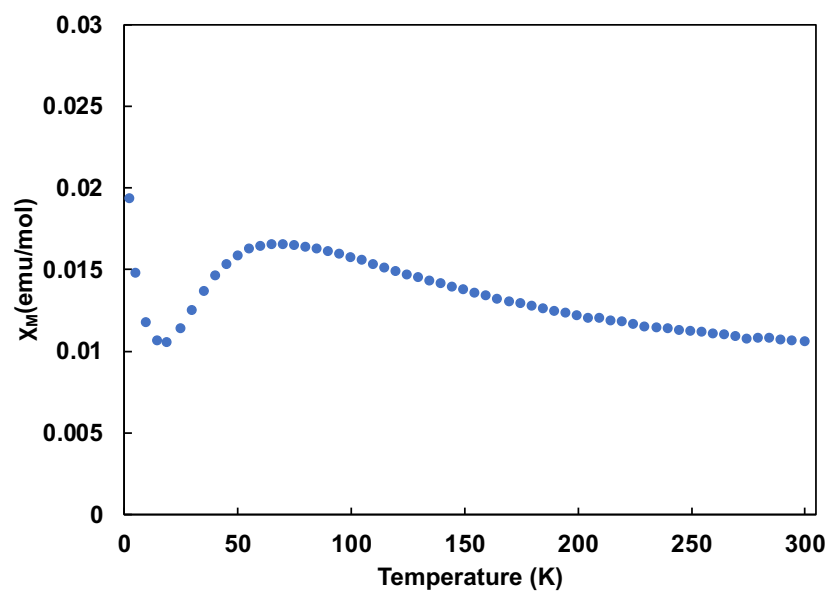

**Figure S38.** Plot of  $\chi_M$  versus temperature data for **1** under an applied field of 1 T.

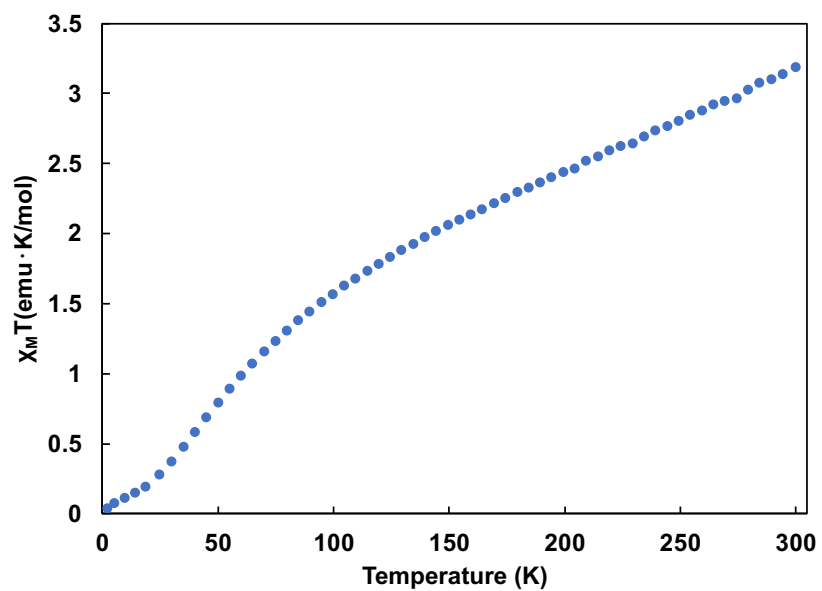

**Figure S39.** Plot of  $\chi_M T$  versus temperature data for **1** under an applied field of 1 T.

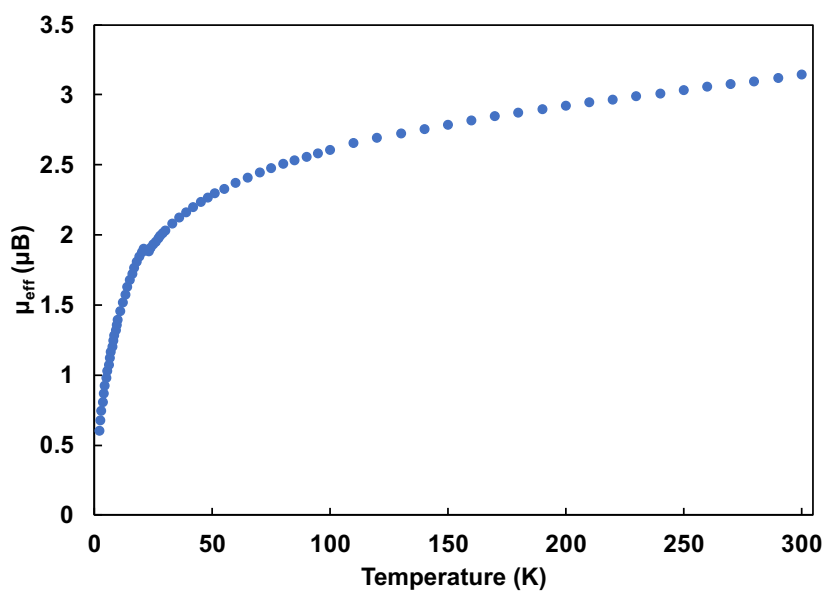

**Figure S40.** Plot of  $\mu_{\text{eff}}$  per ion versus T data for **3** under an applied field of 1 T.

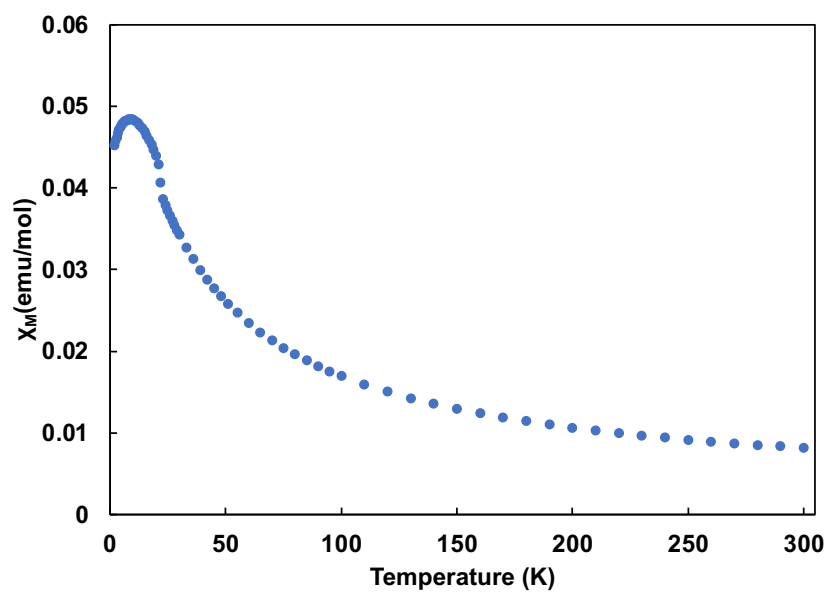

**Figure S41.** Plot of  $\chi_M$  versus temperature data for **3** under an applied field of 1 T.

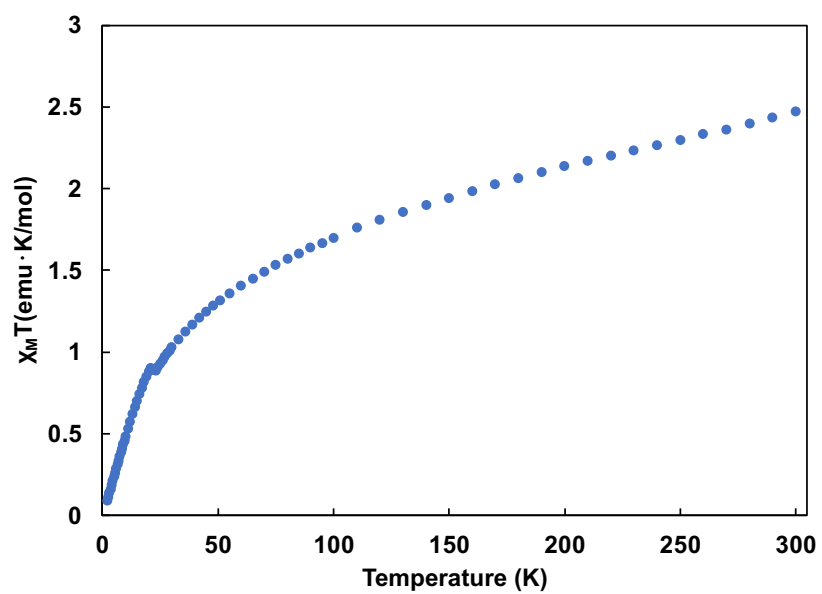

**Figure S42.** Plot of  $\chi_M T$  versus temperature data for **3** under an applied field of 1 T.

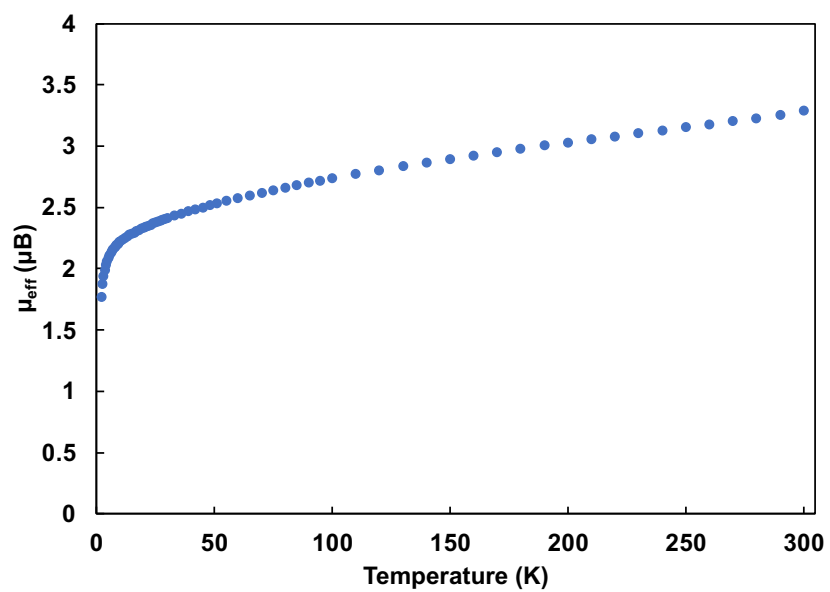

**Figure S43.** Plot of  $\mu_{\text{eff}}$  per ion versus T data for **6** under an applied field of 1 T.

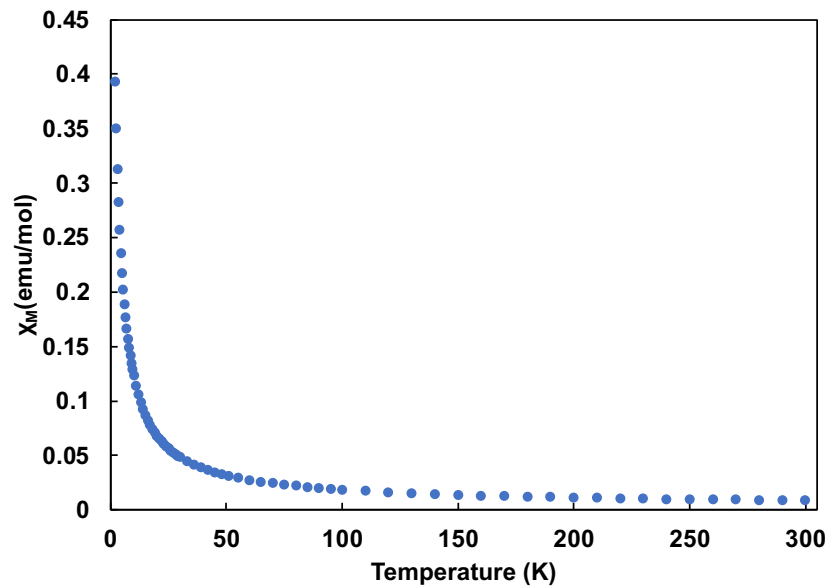

**Figure S44.** Plot of  $\chi_M$  versus temperature data for **6** under an applied field of 1 T.

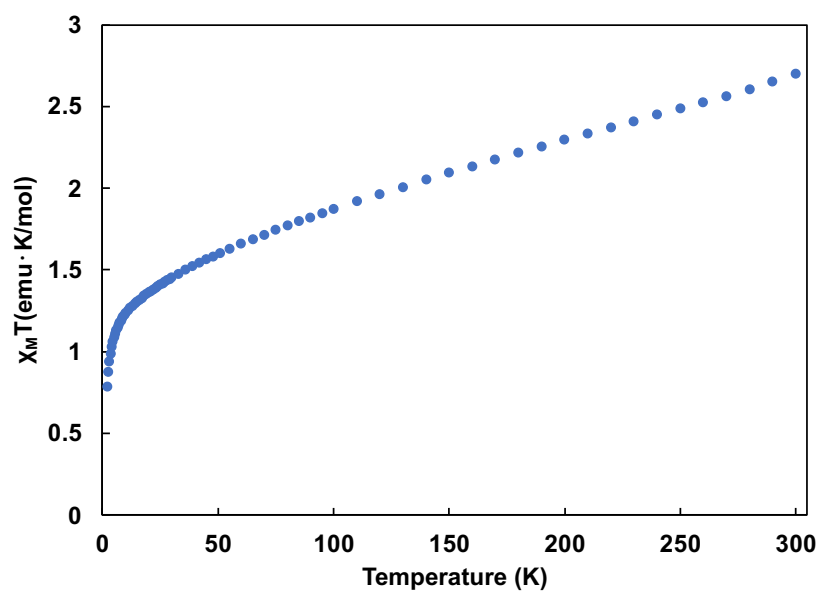

**Figure S45.** Plot of  $\chi_M T$  versus temperature data for **6** under an applied field of 1 T.

## S6. X-ray Crystallography Data

**Table S1.** Crystal data and structural refinement parameters for complexes **1**, **2**·(C<sub>6</sub>H<sub>14</sub>)<sub>2</sub>·(THF)<sub>2</sub>, and **4**·(C<sub>12</sub>H<sub>10</sub>N<sub>2</sub>)·(C<sub>22</sub>H<sub>44</sub>KN<sub>2</sub>O<sub>7</sub>)·(THF)<sub>4</sub>.

|                                                     | <b>1</b>                                                            | <b>2</b> ·(C <sub>6</sub> H <sub>14</sub> ) <sub>2</sub> ·(THF) <sub>2</sub> | <b>4</b> ·(C <sub>12</sub> H <sub>10</sub> N <sub>2</sub> )·(C <sub>22</sub> H <sub>44</sub> KN <sub>2</sub> O <sub>7</sub> )·(THF) <sub>4</sub> |
|-----------------------------------------------------|---------------------------------------------------------------------|------------------------------------------------------------------------------|--------------------------------------------------------------------------------------------------------------------------------------------------|
| Formula                                             | C <sub>116</sub> H <sub>190</sub> CsNO <sub>14</sub> U <sub>2</sub> | C <sub>120</sub> H <sub>202</sub> LiO <sub>13</sub> U <sub>2</sub>           | C <sub>156</sub> H <sub>256</sub> K <sub>2</sub> N <sub>6</sub> O <sub>25</sub> U <sub>2</sub>                                                   |
| Crystal size (mm)                                   | 0.17×0.15×0.10                                                      | 0.42×0.23×0.21                                                               | 0.29×0.12×0.12                                                                                                                                   |
| Crystal System                                      | monoclinic                                                          | triclinic                                                                    | triclinic                                                                                                                                        |
| Space Group                                         | <i>P</i> 2 <sub>1</sub> / <i>c</i>                                  | <i>P</i> -1                                                                  | <i>P</i> -1                                                                                                                                      |
| Volume (Å <sup>3</sup> )                            | 5858.50(19)                                                         | 5890.70(12)                                                                  | 4127.8(4)                                                                                                                                        |
| <i>a</i> (Å)                                        | 14.8121(3)                                                          | 14.9084(2)                                                                   | 15.1585(8)                                                                                                                                       |
| <i>b</i> (Å)                                        | 19.1272(4)                                                          | 19.4995(2)                                                                   | 16.4391(10)                                                                                                                                      |
| <i>c</i> (Å)                                        | 21.0703(4)                                                          | 21.0862(2)                                                                   | 18.5969(10)                                                                                                                                      |
| $\alpha$ (°)                                        | 90                                                                  | 102.1051(10)                                                                 | 77.156(5)                                                                                                                                        |
| $\beta$ (°)                                         | 101.0671(19)                                                        | 97.5370(10)                                                                  | 66.138(5)                                                                                                                                        |
| $\gamma$ (°)                                        | 90                                                                  | 95.7018(11)                                                                  | 82.519(5)                                                                                                                                        |
| <i>Z</i>                                            | 2                                                                   | 2                                                                            | 1                                                                                                                                                |
| Formula Weight                                      | 2431.763                                                            | 2335.80                                                                      | 3170.052                                                                                                                                         |
| Density (g cm <sup>-3</sup> )                       | 1.379                                                               | 1.317                                                                        | 1.275                                                                                                                                            |
| $\mu$ (mm <sup>-1</sup> )                           | 10.549                                                              | 8.110                                                                        | 6.436                                                                                                                                            |
| F(000)                                              | 2477.5                                                              | 2426                                                                         | 1653                                                                                                                                             |
| Temperature (K)                                     | 173.04(14)                                                          | 140.00(10)                                                                   | 140.00(10)                                                                                                                                       |
| Total Reflections                                   | 25396                                                               | 28682                                                                        | 31475                                                                                                                                            |
| Unique Reflections                                  | 11310                                                               | 28682                                                                        | 15234                                                                                                                                            |
| <i>R</i> <sub>int</sub>                             | 0.0298                                                              | -                                                                            | 0.0866                                                                                                                                           |
| R Indices [ <i>I</i> > 2 $\sigma$ ( <i>I</i> )]     | <i>R</i> <sub>1</sub> = 0.0464<br><i>wR</i> <sub>2</sub> = 0.1175   | <i>R</i> <sub>1</sub> = 0.0407<br><i>wR</i> <sub>2</sub> = 0.1130            | <i>R</i> <sub>1</sub> = 0.0721<br><i>wR</i> <sub>2</sub> = 0.1962                                                                                |
| Largest Diff. Peak<br>and Hole (e·Å <sup>-3</sup> ) | 1.7075 and<br>-1.9778                                               | 1.756 and<br>-1.913                                                          | 2.6949 and<br>-2.5288                                                                                                                            |
| GOF                                                 | 1.0868                                                              | 1.023                                                                        | 1.0220                                                                                                                                           |

F(000), structure factor evaluated in the zeroth-order case,  $h=k=l=0$ ;  $R(\text{int}) = \sum |F_o2 - F_o2(\text{mean})| / \sum [F_o2]$ ; *I*, measured intensities; 'Largest diff. peak and hole', maximum and minimum electron density found in the final Fourier difference map; GOF, goodness of fit ( $= \{\sum [w(F_o2 - F_c2)^2] / (n-p)\}^{1/2}$ , where *n* is the number of reflections and *p* is the total number of parameters refined).

**Table S2.** Crystal data and structural refinement parameters for complexes **5** and **6**.

|                                                     | <b>5</b>                                                                                      | <b>6</b>                                                                                        |
|-----------------------------------------------------|-----------------------------------------------------------------------------------------------|-------------------------------------------------------------------------------------------------|
| Formula                                             | C <sub>88</sub> H <sub>148</sub> K <sub>2</sub> O <sub>12</sub> S <sub>2</sub> U <sub>2</sub> | C <sub>120</sub> H <sub>198</sub> K <sub>2</sub> N <sub>4</sub> O <sub>18</sub> SU <sub>2</sub> |
| Crystal size (mm)                                   | 0.34×0.24×0.20                                                                                | 0.13×0.08×0.04                                                                                  |
| Crystal System                                      | triclinic                                                                                     | triclinic                                                                                       |
| Space Group                                         | <i>P</i> -1                                                                                   | <i>P</i> -1                                                                                     |
| Volume (Å <sup>3</sup> )                            | 2627.79(5)                                                                                    | 7113.18(10)                                                                                     |
| <i>a</i> (Å)                                        | 13.70485(13)                                                                                  | 14.45571(11)                                                                                    |
| <i>b</i> (Å)                                        | 14.20424(13)                                                                                  | 17.05206(17)                                                                                    |
| <i>c</i> (Å)                                        | 15.06289(17)                                                                                  | 29.72010(19)                                                                                    |
| $\alpha$ (°)                                        | 93.7454(9)                                                                                    | 79.8697(7)                                                                                      |
| $\beta$ (°)                                         | 113.9243(10)                                                                                  | 80.6323(6)                                                                                      |
| $\gamma$ (°)                                        | 98.2448(8)                                                                                    | 89.8128(7)                                                                                      |
| <i>Z</i>                                            | 1                                                                                             | 2                                                                                               |
| Formula Weight                                      | 2016.44                                                                                       | 2571.13                                                                                         |
| Density (g cm <sup>-3</sup> )                       | 1.274                                                                                         | 1.200                                                                                           |
| $\mu$ (mm <sup>-1</sup> )                           | 10.062                                                                                        | 7.447                                                                                           |
| F(000)                                              | 1026                                                                                          | 2656                                                                                            |
| Temperature (K)                                     | 139.99(10)                                                                                    | 139.99(10)                                                                                      |
| Total Reflections                                   | 50894                                                                                         | 244318                                                                                          |
| Unique Reflections                                  | 10292                                                                                         | 28387                                                                                           |
| <i>R</i> <sub>int</sub>                             | 0.0266                                                                                        | 0.0760                                                                                          |
| R Indices [ <i>I</i> > 2 $\sigma$ ( <i>I</i> )]     | <i>R</i> <sub>1</sub> = 0.0236<br><i>wR</i> <sub>2</sub> = 0.0605                             | <i>R</i> <sub>1</sub> = 0.0517<br><i>wR</i> <sub>2</sub> = 0.1243                               |
| Largest Diff. Peak<br>and Hole (e.Å <sup>-3</sup> ) | 1.405 and<br>-1.224                                                                           | 3.183 and<br>-1.385                                                                             |
| GOF                                                 | 1.056                                                                                         | 1.070                                                                                           |

F(000), structure factor evaluated in the zeroth-order case,  $h=k=l=0$ ;  $R(\text{int}) = \sum |F_o - F_o(\text{mean})| / \sum [F_o]$ ; *I*, measured intensities; 'Largest diff. peak and hole', maximum and minimum electron density found in the final Fourier difference map; GOF, goodness of fit ( $= \{ \sum [w(F_o - F_c)^2] / (n-p) \}^{1/2}$ , where *n* is the number of reflections and *p* is the total number of parameters refined).

## S7. Computational Details

The optimization of three different spin states for uranium complexes were carried out by employing DFT hybrid functional (B3PW91)<sup>11</sup> along with small core pseudopotential Stuttgart basis set for uranium and silicon atoms with additional polarization functions for silicon atoms.<sup>12</sup> Pople basis sets (6-31G\*\*) were employed for the rest of the atoms.<sup>13</sup> Dispersion corrections were included in our calculations by employing D3 version of Grimme's dispersion with Becke-Johnson damping.<sup>14</sup> To account for the solvation effects, SMD model using THF solvent has been included in the calculations.<sup>15</sup> All the calculations were performed using Gaussian 09 suite of programs.<sup>16</sup>

Computed natural charges for  $[\text{SiL}_3\text{UOU}^{\text{Si}}\text{L}_3]^{2-}$ ,  $[\text{SiL}_3\text{UOU}^{\text{Si}}\text{L}_3]^{1-}$ ,  $[\text{SiL}_3\text{UOU}^{\text{Si}}\text{L}_3]$ ,  $[\text{SiL}_3\text{UNU}^{\text{Si}}\text{L}_3]^{3-}$ ,  $[\text{SiL}_3\text{UNU}^{\text{Si}}\text{L}_3]^{2-}$ ,  $[\text{SiL}_3\text{UNU}^{\text{Si}}\text{L}_3]^{1-}$ ,  $[\text{SiL}_3\text{USU}^{\text{Si}}\text{L}_3]^{2-}$ ,  $[\text{SiL}_3\text{USU}^{\text{Si}}\text{L}_3]^{1-}$ ,  $[\text{SiL}_3\text{USU}^{\text{Si}}\text{L}_3]$

| Atom label | Natural charges            |                              |                       |                            |                              |                       |                            |                              |                       |
|------------|----------------------------|------------------------------|-----------------------|----------------------------|------------------------------|-----------------------|----------------------------|------------------------------|-----------------------|
|            | $[\text{UOU}]^{2-}$<br>S=3 | $[\text{UOU}]^{1-}$<br>S=5/2 | $[\text{UOU}]$<br>S=2 | $[\text{UNU}]^{3-}$<br>S=3 | $[\text{UNU}]^{2-}$<br>S=5/2 | $[\text{UNU}]$<br>S=2 | $[\text{USU}]^{2-}$<br>S=3 | $[\text{USU}]^{1-}$<br>S=5/2 | $[\text{USU}]$<br>S=2 |
| U1         | 1.82124                    | 2.08532                      | 2.16329               | 1.59046                    | 1.91077                      | 2.05749               | 1.79053                    | 2.06780                      | 2.15181               |
| O5/N5/S5   | -1.16267                   | -1.08419                     | -1.06808              | -1.51273                   | -1.39435                     | -1.35079              | -1.14441                   | -0.93792                     | -0.85101              |
| O6         | -1.29294                   | -1.23600                     | -1.22221              | -1.27834                   | -1.25575                     | -1.23950              | -1.29067                   | -1.23085                     | -1.21359              |
| O10        | -1.29797                   | -1.23712                     | -1.21592              | -1.28360                   | -1.26733                     | -1.25336              | -1.29745                   | -1.23481                     | -1.22396              |
| O14        | -1.29455                   | -1.22286                     | -1.20311              | -1.27824                   | -1.26065                     | -1.24535              | -1.29042                   | -1.21981                     | -1.20966              |
| U135       | 1.80001                    | 1.89720                      | 2.22493               | 1.59635                    | 1.71184                      | 2.01271               | 1.73066                    | 1.74755                      | 2.00816               |
| O139       | -1.29203                   | -1.28678                     | -1.22069              | -1.28288                   | -1.27316                     | -1.23241              | -1.29039                   | -1.28392                     | -1.20280              |
| O143       | -1.29055                   | -1.29308                     | -1.22606              | -1.27901                   | -1.28392                     | -1.24162              | -1.28254                   | -1.28627                     | -1.21264              |
| O147       | -1.28902                   | -1.29247                     | -1.22541              | -1.27604                   | -1.27399                     | -1.23021              | -1.28897                   | -1.27501                     | -1.21157              |

  

DFT computed spin densities on selected atoms in  $[\text{SiL}_3\text{UOU}^{\text{Si}}\text{L}_3]^{2-}$ ,  $[\text{SiL}_3\text{UOU}^{\text{Si}}\text{L}_3]^{1-}$ ,  $[\text{SiL}_3\text{UOU}^{\text{Si}}\text{L}_3]$ ,  $[\text{SiL}_3\text{UNU}^{\text{Si}}\text{L}_3]^{3-}$ ,  $[\text{SiL}_3\text{UNU}^{\text{Si}}\text{L}_3]^{2-}$ ,  $[\text{SiL}_3\text{UNU}^{\text{Si}}\text{L}_3]^{1-}$ ,  $[\text{SiL}_3\text{USU}^{\text{Si}}\text{L}_3]^{2-}$ ,  $[\text{SiL}_3\text{USU}^{\text{Si}}\text{L}_3]^{1-}$ ,  $[\text{SiL}_3\text{USU}^{\text{Si}}\text{L}_3]$

| Atom label | $[\text{UOU}]^{2-}$<br>S=3 | $[\text{UOU}]^{1-}$<br>S=5/2 | $[\text{UOU}]$<br>S=2 | $[\text{UNU}]^{3-}$<br>S=3 | $[\text{UNU}]^{2-}$<br>S=5/2 | $[\text{UNU}]^{1-}$<br>S=2 | $[\text{USU}]^{2-}$<br>S=3 | $[\text{USU}]^{1-}$<br>S=5/2 | $[\text{USU}]$<br>S=2 |
|------------|----------------------------|------------------------------|-----------------------|----------------------------|------------------------------|----------------------------|----------------------------|------------------------------|-----------------------|
| U1         | 3.11                       | 2.14                         | 2.11                  | 3.12                       | 2.21                         | 2.14                       | 3.11                       | 2.20                         | 2.13                  |
| O5/N5/S5   | -0.01                      | -0.08                        | -0.06                 | -0.19                      | -0.18                        | -0.13                      | -0.07                      | -0.11                        | -0.08                 |
| O6         | -0.03                      | -0.02                        | -0.02                 | -0.02                      | -0.02                        | -0.02                      | -0.03                      | -0.02                        | -0.03                 |
| O10        | -0.03                      | -0.02                        | -0.03                 | -0.02                      | -0.02                        | -0.02                      | -0.03                      | -0.02                        | -0.02                 |
| O14        | -0.03                      | -0.02                        | -0.02                 | -0.02                      | -0.02                        | -0.02                      | -0.03                      | -0.03                        | -0.03                 |
| U135       | 3.10                       | 3.07                         | 2.10                  | 3.10                       | 3.06                         | 2.11                       | 3.12                       | 3.07                         | 2.13                  |
| O139       | -0.03                      | -0.03                        | -0.02                 | -0.02                      | -0.03                        | -0.02                      | -0.03                      | -0.03                        | -0.03                 |
| O143       | -0.03                      | -0.03                        | -0.03                 | -0.03                      | -0.02                        | -0.02                      | -0.03                      | -0.03                        | -0.03                 |
| O147       | -0.03                      | -0.03                        | -0.02                 | -0.02                      | -0.02                        | -0.02                      | -0.03                      | -0.03                        | -0.03                 |



Computed Wiberg bond index for ground spin state of  $[\text{Si}_3\text{L}_3\text{UOU}^{\text{Si}}\text{L}_3]^{2-}$ ,  $[\text{Si}_3\text{L}_3\text{UOU}^{\text{Si}}\text{L}_3]^{1-}$ ,  $[\text{Si}_3\text{L}_3\text{UOU}^{\text{Si}}\text{L}_3]$ ,  $[\text{Si}_3\text{L}_3\text{UNU}^{\text{Si}}\text{L}_3]^{3-}$ ,  $[\text{Si}_3\text{L}_3\text{UNU}^{\text{Si}}\text{L}_3]^{2-}$ ,  $[\text{Si}_3\text{L}_3\text{UNU}^{\text{Si}}\text{L}_3]^{1-}$ ,  $[\text{Si}_3\text{L}_3\text{USU}^{\text{Si}}\text{L}_3]^{2-}$ ,  $[\text{Si}_3\text{L}_3\text{USU}^{\text{Si}}\text{L}_3]^{1-}$ ,  $[\text{Si}_3\text{L}_3\text{USU}^{\text{Si}}\text{L}_3]$

| Atom label | Wiberg bond index                                                                      | Atom label | Wiberg bond index                                                                      | Atom label | Wiberg bond index                                                                      | Atom label | Wiberg bond index                                                                      |
|------------|----------------------------------------------------------------------------------------|------------|----------------------------------------------------------------------------------------|------------|----------------------------------------------------------------------------------------|------------|----------------------------------------------------------------------------------------|
| U1         | 0.0000                                                                                 | U1         | 0.0000                                                                                 | U1         | 0.0000                                                                                 | U1         | 0.0000                                                                                 |
| O5/N5/S5   | 0.6812<br>1.0474<br>0.7852<br>1.1145<br>1.5861<br>1.2448<br>0.6677<br>1.0799<br>0.8210 | O6         | 0.4744<br>0.6598<br>0.7176<br>0.4374<br>0.5422<br>0.6219<br>0.5051<br>0.6887<br>0.7475 | O10        | 0.4643<br>0.6532<br>0.7292<br>0.4353<br>0.5174<br>0.5904<br>0.4708<br>0.6737<br>0.7408 | O14        | 0.4670<br>0.6465<br>0.7238<br>0.4262<br>0.5293<br>0.6039<br>0.5069<br>0.6831<br>0.7305 |
| Atom label | Wiberg bond index                                                                      | Atom label | Wiberg bond index                                                                      | Atom label | Wiberg bond index                                                                      | Atom label | Wiberg bond index                                                                      |
| U135       | 0.0000                                                                                 | U135       | 0.0000                                                                                 | U135       | 0.0000                                                                                 | U135       | 0.0000                                                                                 |
| O5/N5/S5   | 0.7239<br>0.4903<br>0.7743<br>1.1113<br>0.8241<br>1.2284<br>0.7381<br>0.6152<br>0.9824 | O139       | 0.4682<br>0.5088<br>0.7083<br>0.4366<br>0.4960<br>0.6466<br>0.5035<br>0.5357<br>0.7677 | O143       | 0.4806<br>0.5101<br>0.7062<br>0.4462<br>0.4757<br>0.6226<br>0.5127<br>0.5177<br>0.7343 | O147       | 0.4578<br>0.5051<br>0.7140<br>0.4272<br>0.4702<br>0.6131<br>0.4819<br>0.5201<br>0.7250 |

**Bonding orbitals from NBO analysis for ground spin state (Alpha spin orbitals, UOU core) of  $[\text{Si}_3\text{L}_3\text{UOU}^{\text{Si}}\text{L}_3]^{2-}$ , (S=3)**

(0.93210) BD ( 1) O 5- U135  
 ( 92.07%) 0.9595\* O 5 s( 0.04%)p99.99( 99.96%)d 0.03( 0.00%)  
 ( 7.93%) 0.2817\* U135 s( 0.01%)p 1.00( 0.43%)d99.99( 63.90%)f83.13( 35.63%)g 0.06( 0.03%)  
 (0.93113) BD ( 2) O 5- U135  
 ( 92.33%) 0.9609\* O 5 s( 0.30%)p99.99( 99.70%)d 0.00( 0.00%)  
 ( 7.67%) 0.2769\* U135 s( 0.09%)p 6.82( 0.58%)d99.99( 65.32%)f99.99( 33.98%)g 0.35( 0.03%)

**Bonding orbitals from NBO analysis for ground spin state (Alpha spin orbitals, UOU core) of  $[\text{Si}_3\text{L}_3\text{UOU}^{\text{Si}}\text{L}_3]^{1-}$ , (s=5/2)**

(0.98237) BD ( 1) U 1- O 5  
 ( 10.45%) 0.3233\* U 1 s( 0.30%)p 3.45( 1.04%)d99.99( 72.33%) f86.45( 26.04%)g 0.94( 0.28%)  
 ( 89.55%) 0.9463\* O 5 s( 45.10%)p 1.22( 54.86%)d 0.00( 0.04%)  
 (0.95272) BD ( 2) U 1- O 5  
 ( 10.50%) 0.3240\* U 1 s( 0.10%)p 8.23( 0.81%)d99.99( 45.24%) f99.99( 53.77%)g 0.91( 0.09%)  
 ( 89.50%) 0.9460\* O 5 s( 0.04%)p99.99( 99.94%)d 0.29( 0.01%)  
 (0.94999) BD ( 3) U 1- O 5  
 ( 10.42%) 0.3228\* U 1 s( 0.04%)p11.38( 0.47%)d99.99( 50.19%) f99.99( 49.20%)g 2.13( 0.09%)  
 ( 89.58%) 0.9465\* O 5 s( 0.00%)p 1.00( 99.99%)d 0.00( 0.01%)

**Bonding orbitals from NBO analysis for ground spin state (Alpha spin orbitals, UOU core) of  $[\text{Si}_3\text{L}_3\text{UOU}^{\text{Si}}\text{L}_3]$ , (s=2)**

(0.97777) BD ( 1) U 1- O 5  
 ( 8.53%) 0.2921\* U 1 s( 1.28%)p 0.57( 0.73%)d60.55( 77.54%) f15.75( 20.17%)g 0.23( 0.29%)  
 ( 91.47%) 0.9564\* O 5 s( 49.67%)p 1.01( 50.32%)d 0.00( 0.02%)  
 (0.97207) BD ( 1) O 5- U135  
 ( 93.02%) 0.9645\* O 5 s( 50.11%)p 1.00( 49.87%)d 0.00( 0.01%)  
 ( 6.98%) 0.2642\* U135 s( 1.79%)p 1.43( 2.56%)d36.24( 64.99%) f15.50( 27.80%)g 1.59( 2.85%)

**Bonding orbitals from NBO analysis for ground spin state (Alpha spin orbitals, UNU core) of  $[\text{Si}_3\text{L}_3\text{UNU}^{\text{Si}}\text{L}_3]^{3-}$ , (S=3)**

(0.97486) BD ( 1) U 1- N 5  
 ( 14.47%) 0.3804\* U 1 s( 9.21%)p 0.17( 1.58%)d 8.43( 77.62%) f 1.25( 11.54%)g 0.01( 0.06%)  
 ( 85.53%) 0.9248\* N 5 s( 49.94%)p 1.00( 50.04%)d 0.00( 0.02%)  
 (0.97323) BD ( 1) N 5- U135  
 ( 86.12%) 0.9280\* N 5 s( 49.95%)p 1.00( 50.04%)d 0.00( 0.02%)

( 13.88%) 0.3726\* U135 s( 6.38%)p 0.28( 1.77%)d13.08( 83.39%) f 1.32( 8.41%)g 0.01( 0.06%)

**Bonding orbitals from NBO analysis for ground spin state (Alpha spin orbitals, UNU core) of  $[\text{SiL}_3\text{UNUSiL}_3]^{2-}$ , (S=5/2)**

(0.98530) BD ( 1) U 1- N 5  
( 21.27%) 0.4612\* U 1 s( 0.14%)p 5.78( 0.79%)d99.99( 53.36%) f99.99( 45.66%)g 0.34( 0.05%)  
( 78.73%) 0.8873\* N 5 s( 40.46%)p 1.47( 59.48%)d 0.00( 0.06%)  
(0.91884) BD ( 2) U 1- N 5  
( 19.69%) 0.4437\* U 1 s( 0.01%)p 1.00( 0.24%)d99.99( 52.90%) f99.99( 46.83%)g 0.10( 0.03%)  
( 80.31%) 0.8962\* N 5 s( 0.08%)p99.99( 99.91%)d 0.20( 0.02%)  
(0.91461) BD ( 3) U 1- N 5  
( 19.04%) 0.4363\* U 1 s( 0.01%)p 1.00( 0.29%)d99.99( 54.10%) f99.99( 45.58%)g 0.10( 0.03%)  
( 80.96%) 0.8998\* N 5 s( 0.03%)p99.99( 99.95%)d 0.48( 0.02%)  
(0.96932) BD ( 1) N 5- U135  
( 88.21%) 0.9392\* N 5 s( 59.43%)p 0.68( 40.56%)d 0.00( 0.01%)  
( 11.79%) 0.3433\* U135 s( 12.74%)p 0.07( 0.84%)d 6.23( 79.38%) f 0.55( 6.99%)g 0.00( 0.05%)

**Bonding orbitals from NBO analysis for ground spin state (Alpha spin orbitals, UNU core) of  $[\text{SiL}_3\text{UNUSiL}_3]^{1-}$ , (S=2)**

(0.97191) BD ( 1) U 1- N 5  
( 16.37%) 0.4046\* U 1 s( 1.27%)p 0.41( 0.52%)d43.27( 55.04%) f33.52( 42.63%)g 0.42( 0.53%)  
( 83.63%) 0.9145\* N 5 s( 48.26%)p 1.07( 51.71%)d 0.00( 0.02%)  
(0.97221) BD ( 1) N 5- U135  
( 84.19%) 0.9176\* N 5 s( 51.56%)p 0.94( 48.42%)d 0.00( 0.02%)  
( 15.81%) 0.3976\* U135 s( 3.18%)p 0.20( 0.62%)d16.55( 52.63%) f13.59( 43.23%)g 0.11( 0.34%)

**Bonding orbitals from NBO analysis for ground spin state (Alpha spin orbitals, USU core) of  $[\text{SiL}_3\text{USUSiL}_3]^{2-}$ , (S=3)**

(0.98251) BD ( 1) U 1- S 5  
( 7.68%) 0.2770\* U 1 s( 6.60%)p 0.04( 0.28%)d11.53( 76.07%) f 2.58( 17.04%)g 0.00( 0.02%)  
( 92.32%) 0.9609\* S 5 s( 49.59%)p 1.02( 50.39%)d 0.00( 0.02%)  
(0.92814) BD ( 2) U 1- S 5  
( 6.38%) 0.2525\* U 1 s( 0.52%)p 1.42( 0.75%)d99.99( 76.50%) f42.35( 22.22%)g 0.01( 0.01%)  
( 93.62%) 0.9676\* S 5 s( 0.02%)p99.99( 99.97%)d 0.45( 0.01%)  
(0.92244) BD ( 3) U 1- S 5  
( 5.32%) 0.2307\* U 1 s( 0.04%)p20.21( 0.89%)d99.99( 82.08%) f99.99( 16.97%)g 0.26( 0.01%)  
( 94.68%) 0.9730\* S 5 s( 0.01%)p 1.00( 99.99%)d 0.00( 0.01%)  
(0.97046) BD ( 1) S 5- U135  
( 91.78%) 0.9580\* S 5 s( 50.37%)p 0.99( 49.61%)d 0.00( 0.02%)  
( 8.22%) 0.2866\* U135 s( 17.39%)p 0.02( 0.39%)d 3.97( 69.07%) f 0.75( 13.11%)g 0.00( 0.04%)

**Bonding orbitals from NBO analysis for ground spin state (Alpha spin orbitals, USU core) of  $[\text{SiL}_3\text{USUSiL}_3]^{1-}$ , (S=5/2)**

(0.96106) BD ( 1) U 1- S 5  
( 11.18%) 0.3343\* U 1 s( 4.12%)p 0.68( 2.80%)d11.52( 47.42%) f10.95( 45.09%)g 0.14( 0.57%)  
( 88.82%) 0.9425\* S 5 s( 32.11%)p 2.11( 67.83%)d 0.00( 0.06%)  
(0.93761) BD ( 2) U 1- S 5  
( 10.93%) 0.3305\* U 1 s( 0.97%)p 0.42( 0.41%)d39.55( 38.49%) f61.72( 60.07%)g 0.06( 0.06%)  
( 89.07%) 0.9438\* S 5 s( 0.04%)p99.99( 99.93%)d 0.66( 0.03%)  
(0.95602) BD ( 1) S 5- U135  
( 92.56%) 0.9621\* S 5 s( 67.82%)p 0.47( 32.15%)d 0.00( 0.03%)  
( 7.44%) 0.2728\* U135 s( 15.49%)p 0.02( 0.34%)d 3.66( 56.72%) f 1.77( 27.44%)g 0.00( 0.02%)

**Bonding orbitals from NBO analysis for ground spin state (Alpha spin orbitals, USU core) of  $[\text{SiL}_3\text{USUSiL}_3]$ , (S=2)**

(0.96204) BD ( 1) U 1- S 5  
( 9.33%) 0.3054\* U 1 s( 2.26%)p 0.52( 1.17%)d22.12( 49.94%) f20.58( 46.47%)g 0.07( 0.16%)  
( 90.67%) 0.9522\* S 5 s( 42.88%)p 1.33( 57.07%)d 0.00( 0.05%)  
(0.95509) BD ( 1) S 5- U135  
( 90.93%) 0.9536\* S 5 s( 51.45%)p 0.94( 48.50%)d 0.00( 0.05%)  
( 9.07%) 0.3012\* U135 s( 5.65%)p 0.41( 2.31%)d11.15( 63.01%) f 5.04( 28.46%)g 0.10( 0.57%)

DFT computed NBO second order perturbation analysis for UOU core in  $[\text{SiL}_3\text{UOU}^{\text{Si}}\text{L}_3]^{2-}$ 

| Donor NBO                                                                                                                                                                                         | Acceptor NBO                                                                                    | E(2)<br>kcal/mol |
|---------------------------------------------------------------------------------------------------------------------------------------------------------------------------------------------------|-------------------------------------------------------------------------------------------------|------------------|
| (0.91911) LP ( 1) O 5<br>s( 1.47%)p67.21( 98.53%)d 0.00( 0.00%)                                                                                                                                   | (0.11237) LV ( 1) U 1<br>s( 0.77%)p 0.98( 0.75%)d99.99(<br>78.92%)f25.47( 19.54%)g 0.03( 0.02%) | 13.56            |
| (0.91172) LP ( 2) O 5<br>s( 98.17%)p 0.02( 1.81%)d 0.00( 0.03%)                                                                                                                                   | (0.11237) LV ( 1) U 1<br>s( 0.77%)p 0.98( 0.75%)d99.99(<br>78.92%)f25.47( 19.54%)g 0.03( 0.02%) | 35.40            |
| (0.93210) BD ( 1) O 5- U135<br>( 92.07%) 0.9595* O 5 s( 0.04%)p99.99(<br>99.96%)d 0.03( 0.00%)<br>( 7.93%) 0.2817* U135 s( 0.01%)p 1.00(<br>0.43%)d99.99( 63.90%)f83.13( 35.63%)g<br>0.06( 0.03%) | (0.09545) LV ( 3) U 1<br>s( 0.13%)p 5.13( 0.65%)d99.99(<br>94.56%)f36.86( 4.66%)g 0.06( 0.01%)  | 9.71             |
| (0.93113) BD ( 2) O 5- U135<br>( 92.33%) 0.9609* O 5 s( 0.30%)p99.99(<br>99.70%)d 0.00( 0.00%)<br>( 7.67%) 0.2769* U135 s( 0.09%)p 6.82(<br>0.58%)d99.99( 65.32%)f99.99( 33.98%)g<br>0.35( 0.03%) | (0.09774) LV ( 2) U 1<br>s( 0.13%)p 3.75( 0.48%)d99.99(<br>94.64%)f37.02( 4.74%)g 0.04( 0.01%)  | 12.15            |

DFT computed NBO second order perturbation analysis for UOU core in  $[\text{SiL}_3\text{UOU}^{\text{Si}}\text{L}_3]^{1-}$ 

| Donor NBO                                                                                                                                                                                          | Acceptor NBO                                                                                     | E(2)<br>kcal/mol |
|----------------------------------------------------------------------------------------------------------------------------------------------------------------------------------------------------|--------------------------------------------------------------------------------------------------|------------------|
| (0.92156) LP ( 1) O 5<br>s( 54.84%)p 0.82( 45.16%)d 0.00( 0.00%)                                                                                                                                   | (0.11318) LV ( 1) U135<br>s( 0.19%)p 3.71( 0.69%)d99.99(<br>58.12%)f99.99( 40.97%)g 0.16( 0.03%) | 5.37             |
| (0.92156) LP ( 1) O 5<br>s( 54.84%)p 0.82( 45.16%)d 0.00( 0.00%)                                                                                                                                   | (0.09342) LV ( 2) U135<br>s( 0.27%)p 2.58( 0.70%)d99.99(<br>62.84%)f99.99( 36.15%)g 0.12( 0.03%) | 7.90             |
| (0.92156) LP ( 1) O 5<br>s( 54.84%)p 0.82( 45.16%)d 0.00( 0.00%)                                                                                                                                   | (0.07832) LV ( 3) U135<br>s( 0.04%)p25.77( 0.99%)d99.99(<br>58.82%)f99.99( 40.12%)g 0.89( 0.03%) | 12.13            |
| (0.98237) BD ( 1) U 1- O 5<br>( 10.45%) 0.3233* U 1 s( 0.30%)p 3.45(<br>1.04%)d99.99( 72.33%) f86.45( 26.04%)g<br>0.94( 0.28%)<br>( 89.55%) 0.9463* O 5 s( 45.10%)p 1.22(<br>54.86%)d 0.00( 0.04%) | (0.07832) LV ( 3) U135<br>s( 0.04%)p25.77( 0.99%)d99.99(<br>58.82%)f99.99( 40.12%)g 0.89( 0.03%) | 3.58             |
| (0.95272) BD ( 2) U 1- O 5<br>( 10.50%) 0.3240* U 1 s( 0.10%)p 8.23(<br>0.81%)d99.99( 45.24%) f99.99( 53.77%)g<br>0.91( 0.09%)<br>( 89.50%) 0.9460* O 5 s( 0.04%)p99.99(<br>99.94%)d 0.29( 0.01%)  | (0.06266) LV ( 8) U135<br>s( 0.10%)p 2.53( 0.25%)d99.99(<br>57.16%)f99.99( 42.44%)g 0.45( 0.04%) | 5.66             |
| (0.94999) BD ( 3) U 1- O 5<br>( 10.42%) 0.3228* U 1 s( 0.04%)p11.38(<br>0.47%)d99.99( 50.19%) f99.99( 49.20%)g<br>2.13( 0.09%)<br>( 89.58%) 0.9465* O 5 s( 0.00%)p 1.00(<br>99.99%)d 0.00( 0.01%)  | (0.07014) LV ( 6) U135<br>s( 0.17%)p 2.04( 0.36%)d99.99(<br>57.31%)f99.99( 42.13%)g 0.20( 0.03%) | 8.17             |

DFT computed NBO second order perturbation analysis for UOU core in  $[\text{SiL}_3\text{UOU}^{\text{Si}}\text{L}_3]$ 

| Donor NBO                                                       | Acceptor NBO                                                                                     | E(2)<br>kcal/mol |
|-----------------------------------------------------------------|--------------------------------------------------------------------------------------------------|------------------|
| (0.85610) LP ( 1) O 5<br>s( 0.14%)p99.99( 99.86%)d 0.00( 0.00%) | (0.04169) LV ( 3) U 1<br>s( 17.06%)p 0.10( 1.64%)d 2.02( 34.52%)f<br>2.72( 46.43%)g 0.02( 0.35%) | 4.37             |
| (0.85610) LP ( 1) O 5<br>s( 0.14%)p99.99( 99.86%)d 0.00( 0.00%) | (0.07796) LV ( 2) U135                                                                           | 14.27            |

|                                                                                                                                                                                            |                                                                                               |      |
|--------------------------------------------------------------------------------------------------------------------------------------------------------------------------------------------|-----------------------------------------------------------------------------------------------|------|
|                                                                                                                                                                                            | s( 0.20%)p24.49( 4.87%)d99.99( 33.88%)f99.99( 59.73%)g 6.67( 1.33%)                           |      |
| (0.97777) BD ( 1) U 1- O 5<br>( 8.53%) 0.2921* U 1 s( 1.28%)p 0.57( 0.73%)d60.55( 77.54%) f15.75( 20.17%)g 0.23( 0.29%)<br>( 91.47%) 0.9564* O 5 s( 49.67%)p 1.01( 50.32%)d 0.00( 0.02%)   | (0.03761) LV ( 6) U135<br>s( 89.67%)p 0.01( 0.69%)d 0.05( 4.16%)f 0.06( 4.94%)g 0.01( 0.54%)  | 4.65 |
| (0.97207) BD ( 1) O 5- U135<br>( 93.02%) 0.9645* O 5 s( 50.11%)p 1.00( 49.87%)d 0.00( 0.01%)<br>( 6.98%) 0.2642* U135 s( 1.79%)p 1.43( 2.56%)d36.24( 64.99%) f15.50( 27.80%)g 1.59( 2.85%) | (0.03615) LV ( 4) U 1<br>s( 76.56%)p 0.00( 0.23%)d 0.14( 10.72%)f 0.16( 12.44%)g 0.00( 0.05%) | 3.26 |

DFT computed NBO second order perturbation analysis for UNU core in  $[\text{SiL}_3\text{UNUSiL}_3]^{3-}$

| Donor NBO                                                                                                                                                                                  | Acceptor NBO                                                                                 | E(2) kcal/mol |
|--------------------------------------------------------------------------------------------------------------------------------------------------------------------------------------------|----------------------------------------------------------------------------------------------|---------------|
| (0.97486) BD ( 1) U 1- N 5<br>( 14.47%) 0.3804* U 1 s( 9.21%)p 0.17( 1.58%)d 8.43( 77.62%) f 1.25( 11.54%)g 0.01( 0.06%)<br>( 85.53%) 0.9248* N 5 s( 49.94%)p 1.00( 50.04%)d 0.00( 0.02%)  | (0.05238) LV ( 3) U135<br>s( 86.19%)p 0.01( 0.90%)d 0.07( 6.10%)f 0.08( 6.81%)g 0.00( 0.00%) | 1.96          |
| (0.97323) BD ( 1) N 5- U135<br>( 86.12%) 0.9280* N 5 s( 49.95%)p 1.00( 50.04%)d 0.00( 0.02%)<br>( 13.88%) 0.3726* U135 s( 6.38%)p 0.28( 1.77%)d13.08( 83.39%) f 1.32( 8.41%)g 0.01( 0.06%) | (0.05712) LV ( 3) U 1<br>s( 81.82%)p 0.01( 0.80%)d 0.12( 9.91%)f 0.09( 7.47%)g 0.00( 0.01%)  | 1.12          |

DFT computed NBO second order perturbation analysis for UNU core in  $[\text{SiL}_3\text{UNUSiL}_3]^{2-}$

| Donor NBO                                                                                                                                                                                   | Acceptor NBO                                                                                  | E(2) kcal/mol |
|---------------------------------------------------------------------------------------------------------------------------------------------------------------------------------------------|-----------------------------------------------------------------------------------------------|---------------|
| (0.91884) BD ( 2) U 1- N 5<br>( 19.69%) 0.4437* U 1 s( 0.01%)p 1.00( 0.24%)d99.99( 52.90%) f99.99( 46.83%)g 0.10( 0.03%)<br>( 80.31%) 0.8962* N 5 s( 0.08%)p99.99( 99.91%)d 0.20( 0.02%)    | (0.10979) LV ( 1) U135<br>s( 0.00%)p 1.00( 0.40%)d99.99( 87.08%)f31.24( 12.51%)g 0.01( 0.00%) | 3.49          |
| (0.91884) BD ( 2) U 1- N 5<br>( 19.69%) 0.4437* U 1 s( 0.01%)p 1.00( 0.24%)d99.99( 52.90%) f99.99( 46.83%)g 0.10( 0.03%)<br>( 80.31%) 0.8962* N 5 s( 0.08%)p99.99( 99.91%)d 0.20( 0.02%)    | (0.10315) LV ( 2) U135<br>s( 0.00%)p 1.00( 0.47%)d99.99( 86.08%)f28.74( 13.44%)g 0.01( 0.01%) | 8.97          |
| (0.91461) BD ( 3) U 1- N 5<br>( 19.04%) 0.4363* U 1 s( 0.01%)p 1.00( 0.29%)d99.99( 54.10%) f99.99( 45.58%)g 0.10( 0.03%)<br>( 80.96%) 0.8998* N 5 s( 0.03%)p99.99( 99.95%)d 0.48( 0.02%)    | (0.10979) LV ( 1) U135<br>s( 0.00%)p 1.00( 0.40%)d99.99( 87.08%)f31.24( 12.51%)g 0.01( 0.00%) | 10.77         |
| (0.96932) BD ( 1) N 5- U135<br>( 88.21%) 0.9392* N 5 s( 59.43%)p 0.68( 40.56%)d 0.00( 0.01%)<br>( 11.79%) 0.3433* U135 s( 12.74%)p 0.07( 0.84%)d 6.23( 79.38%) f 0.55( 6.99%)g 0.00( 0.05%) | (0.10879) LV ( 1) U 1<br>s( 6.69%)p 0.10( 0.65%)d 8.91( 59.67%)f 4.93( 32.98%)g 0.00( 0.01%)  | 3.68          |
| (0.96932) BD ( 1) N 5- U135<br>( 88.21%) 0.9392* N 5 s( 59.43%)p 0.68( 40.56%)d 0.00( 0.01%)                                                                                                | (0.09140) LV ( 3) U 1<br>s( 10.01%)p 0.09( 0.88%)d 6.40( 64.02%)f 2.51( 25.08%)g 0.00( 0.01%) | 3.60          |

|                                                                                                   |  |  |
|---------------------------------------------------------------------------------------------------|--|--|
| ( 11.79%) 0.3433* U135 s( 12.74%)p<br>0.07( 0.84%)d 6.23( 79.38%) f 0.55(<br>6.99%)g 0.00( 0.05%) |  |  |
|---------------------------------------------------------------------------------------------------|--|--|

DFT computed NBO second order perturbation analysis for UNU core in [SiL<sub>3</sub>UNUSiL<sub>3</sub>]<sup>1-</sup>

| Donor NBO                                                                                                                                                                                            | Acceptor NBO                                                                                     | E(2)<br>kcal/mol |
|------------------------------------------------------------------------------------------------------------------------------------------------------------------------------------------------------|--------------------------------------------------------------------------------------------------|------------------|
| (0.73817) LP ( 2) N 5<br>s( 0.04%)p99.99( 99.96%)d 0.01( 0.00%)                                                                                                                                      | (0.09355) LV ( 1) U 1<br>s( 1.89%)p 0.61( 1.14%)d24.63(<br>46.53%)f26.44( 49.95%)g 0.26( 0.49%)  | 8.06             |
| (0.73817) LP ( 2) N 5<br>s( 0.04%)p99.99( 99.96%)d 0.01( 0.00%)                                                                                                                                      | (0.09152) LV ( 2) U 1<br>s( 1.10%)p 1.25( 1.38%)d37.63(<br>41.38%)f50.72( 55.78%)g 0.33( 0.37%)  | 5.26             |
| (0.73817) LP ( 2) N 5<br>s( 0.04%)p99.99( 99.96%)d 0.01( 0.00%)                                                                                                                                      | (0.09322) LV ( 1) U135<br>s( 0.03%)p14.73( 0.48%)d99.99(<br>42.57%)f99.99( 56.82%)g 3.10( 0.10%) | 10.73            |
| (0.97191) BD ( 1) U 1- N 5<br>( 16.37%) 0.4046* U 1 s( 1.27%)p 0.41(<br>0.52%)d43.27( 55.04%) f33.52( 42.63%)g<br>0.42( 0.53%)<br>( 83.63%) 0.9145* N 5 s( 48.26%)p 1.07(<br>51.71%)d 0.00( 0.02%)   | (0.03325) LV ( 5) U135<br>s( 76.92%)p 0.00( 0.17%)d 0.11( 8.12%)f<br>0.19( 14.52%)g 0.00( 0.26%) | 6.41             |
| (0.97221) BD ( 1) N 5- U135<br>( 84.19%) 0.9176* N 5 s( 51.56%)p 0.94(<br>48.42%)d 0.00( 0.02%)<br>( 15.81%) 0.3976* U135 s( 3.18%)p<br>0.20( 0.62%)d16.55( 52.63%) f13.59(<br>43.23%)g 0.11( 0.34%) | (0.03516) LV ( 6) U 1<br>s( 83.61%)p 0.01( 0.57%)d 0.08( 6.32%)f<br>0.11( 9.06%)g 0.01( 0.44%)   | 5.72             |

DFT computed NBO second order perturbation analysis for USU core in [SiL<sub>3</sub>USUSiL<sub>3</sub>]<sup>2-</sup>

| Donor NBO                                                                                                                                                                                        | Acceptor NBO                                                                                      | E(2)<br>kcal/mol |
|--------------------------------------------------------------------------------------------------------------------------------------------------------------------------------------------------|---------------------------------------------------------------------------------------------------|------------------|
| (0.92814) BD ( 2) U 1- S 5<br>( 6.38%) 0.2525* U 1 s( 0.52%)p 1.42(<br>0.75%)d99.99( 76.50%) f42.35( 22.22%)g<br>0.01( 0.01%)<br>( 93.62%) 0.9676* S 5 s( 0.02%)p99.99(<br>99.97%)d 0.45( 0.01%) | (0.07973) LV ( 4) U135<br>s( 14.28%)p 0.05( 0.65%)d 4.18( 59.70%)f<br>1.78( 25.35%)g 0.00( 0.02%) | 5.28             |
| (0.92814) BD ( 2) U 1- S 5<br>( 6.38%) 0.2525* U 1 s( 0.52%)p 1.42(<br>0.75%)d99.99( 76.50%) f42.35( 22.22%)g<br>0.01( 0.01%)<br>( 93.62%) 0.9676* S 5 s( 0.02%)p99.99(<br>99.97%)d 0.45( 0.01%) | (0.05457) LV ( 6) U135<br>s( 10.48%)p 0.02( 0.22%)d 3.42( 35.89%)f<br>5.09( 53.38%)g 0.00( 0.02%) | 2.51             |
| (0.92244) BD ( 3) U 1- S 5<br>( 5.32%) 0.2307* U 1 s( 0.04%)p20.21(<br>0.89%)d99.99( 82.08%) f99.99( 16.97%)g<br>0.26( 0.01%)<br>( 94.68%) 0.9730* S 5 s( 0.01%)p 1.00(<br>99.99%)d 0.00( 0.01%) | (0.09935) LV ( 1) U135<br>s( 0.12%)p 6.63( 0.79%)d99.99(<br>88.23%)f90.67( 10.85%)g 0.13( 0.02%)  | 7.56             |
| (0.92244) BD ( 3) U 1- S 5<br>( 5.32%) 0.2307* U 1 s( 0.04%)p20.21(<br>0.89%)d99.99( 82.08%) f99.99( 16.97%)g<br>0.26( 0.01%)<br>( 94.68%) 0.9730* S 5 s( 0.01%)p 1.00(<br>99.99%)d 0.00( 0.01%) | (0.07973) LV ( 4) U135<br>s( 14.28%)p 0.05( 0.65%)d 4.18( 59.70%)f<br>1.78( 25.35%)g 0.00( 0.02%) | 2.65             |
| (0.97046) BD ( 1) S 5- U135<br>( 91.78%) 0.9580* S 5 s( 50.37%)p 0.99(<br>49.61%)d 0.00( 0.02%)                                                                                                  | (0.04261) LV ( 5) U 1<br>s( 49.65%)p 0.01( 0.36%)d 0.23( 11.45%)f<br>0.78( 38.52%)g 0.00( 0.02%)  | 2.68             |

|                                                                                                   |  |  |
|---------------------------------------------------------------------------------------------------|--|--|
| ( 8.22%) 0.2866* U135 s( 17.39%)p<br>0.02( 0.39%)d 3.97( 69.07%) f 0.75(<br>13.11%)g 0.00( 0.04%) |  |  |
|---------------------------------------------------------------------------------------------------|--|--|

DFT computed NBO second order perturbation analysis for USU core in [<sup>Si</sup>L<sub>3</sub>USU<sup>Si</sup>L<sub>3</sub>]<sup>1-</sup>

| Donor NBO                                                                                                                                                                                            | Acceptor NBO                                                                                      | E(2)<br>kcal/mol |
|------------------------------------------------------------------------------------------------------------------------------------------------------------------------------------------------------|---------------------------------------------------------------------------------------------------|------------------|
| (0.84703) LP ( 1) S 5<br>s( 0.02%)p99.99( 99.94%)d 2.74( 0.04%)                                                                                                                                      | (0.09499) LV ( 1) U135<br>s( 0.19%)p 2.76( 0.51%)d99.99(<br>90.85%)f45.42( 8.44%)g 0.06( 0.01%)   | 10.56            |
| (0.96106) BD ( 1) U 1- S 5<br>( 11.18%) 0.3343* U 1 s( 4.12%)p 0.68(<br>2.80%)d11.52( 47.42%) f10.95( 45.09%)g<br>0.14( 0.57%)<br>( 88.82%) 0.9425* S 5 s( 32.11%)p 2.11(<br>67.83%)d 0.00( 0.06%)   | (0.04759) LV ( 7) U135<br>s( 58.34%)p 0.01( 0.49%)d 0.32( 18.73%)f<br>0.38( 22.42%)g 0.00( 0.03%) | 6.72             |
| (0.96106) BD ( 1) U 1- S 5<br>( 11.18%) 0.3343* U 1 s( 4.12%)p 0.68(<br>2.80%)d11.52( 47.42%) f10.95( 45.09%)g<br>0.14( 0.57%)<br>( 88.82%) 0.9425* S 5 s( 32.11%)p 2.11(<br>67.83%)d 0.00( 0.06%)   | (0.04499) LV ( 8) U135<br>s( 15.35%)p 0.02( 0.34%)d 1.44( 22.16%)f<br>4.05( 62.12%)g 0.00( 0.04%) | 3.00             |
| (0.95602) BD ( 1) S 5- U135<br>( 92.56%) 0.9621* S 5 s( 67.82%)p 0.47(<br>32.15%)d 0.00( 0.03%)<br>( 7.44%) 0.2728* U135 s( 15.49%)p<br>0.02( 0.34%)d 3.66( 56.72%) f 1.77(<br>27.44%)g 0.00( 0.02%) | (0.04087) LV ( 7) U 1<br>s( 84.68%)p 0.08( 6.41%)d 0.02( 1.53%)f<br>0.08( 7.10%)g 0.00( 0.28%)    | 5.07             |

DFT computed NBO second order perturbation analysis for USU core in [<sup>Si</sup>L<sub>3</sub>USU<sup>Si</sup>L<sub>3</sub>]

| Donor NBO                                                                                                                                                                                           | Acceptor NBO                                                                                     | E(2)<br>kcal/mol |
|-----------------------------------------------------------------------------------------------------------------------------------------------------------------------------------------------------|--------------------------------------------------------------------------------------------------|------------------|
| (0.83467) LP ( 1) S 5<br>s( 3.48%)p27.76( 96.49%)d 0.01( 0.03%)                                                                                                                                     | (0.08661) LV ( 3) U135<br>s( 2.66%)p 0.54( 1.43%)d14.21(<br>37.77%)f21.72( 57.73%)g 0.16( 0.41%) | 2.81             |
| (0.81677) LP ( 2) S 5<br>s( 2.18%)p44.79( 97.78%)d 0.02( 0.04%)                                                                                                                                     | (0.10525) LV ( 1) U 1<br>s( 0.37%)p 0.74( 0.27%)d99.99(<br>44.96%)f99.99( 54.30%)g 0.26( 0.10%)  | 7.59             |
| (0.96204) BD ( 1) U 1- S 5<br>( 9.33%) 0.3054* U 1 s( 2.26%)p 0.52(<br>1.17%)d22.12( 49.94%) f20.58( 46.47%)g<br>0.07( 0.16%)<br>( 90.67%) 0.9522* S 5 s( 42.88%)p 1.33(<br>57.07%)d 0.00( 0.05%)   | (0.03816) LV ( 5) U135<br>s( 72.42%)p 0.03( 2.24%)d 0.12( 8.78%)f<br>0.22( 16.25%)g 0.00( 0.30%) | 6.09             |
| (0.95509) BD ( 1) S 5- U135<br>( 90.93%) 0.9536* S 5 s( 51.45%)p 0.94(<br>48.50%)d 0.00( 0.05%)<br>( 9.07%) 0.3012* U135 s( 5.65%)p 0.41(<br>2.31%)d11.15( 63.01%) f 5.04( 28.46%)g<br>0.10( 0.57%) | (0.03844) LV ( 5) U 1<br>s( 89.45%)p 0.01( 1.33%)d 0.03( 2.61%)f<br>0.07( 6.57%)g 0.00( 0.04%)   | 6.38             |

DFT computed MO's (Alpha spin orbitals) for ground state spin

|        | $[\text{Si}_3\text{UOU}^{\text{Si}}\text{L}_3]^{2-}$<br>S=3 | $[\text{Si}_3\text{UOU}^{\text{Si}}\text{L}_3]^{1-}$<br>S=5/2 | $[\text{Si}_3\text{UOU}^{\text{Si}}\text{L}_3]$<br>S=2 |
|--------|-------------------------------------------------------------|---------------------------------------------------------------|--------------------------------------------------------|
| HOMO-5 |                                                             |                                                               |                                                        |
| HOMO-4 |                                                             |                                                               |                                                        |
| HOMO-3 |                                                             |                                                               |                                                        |
| HOMO-2 |                                                             |                                                               |                                                        |
| HOMO-1 |                                                             |                                                               |                                                        |

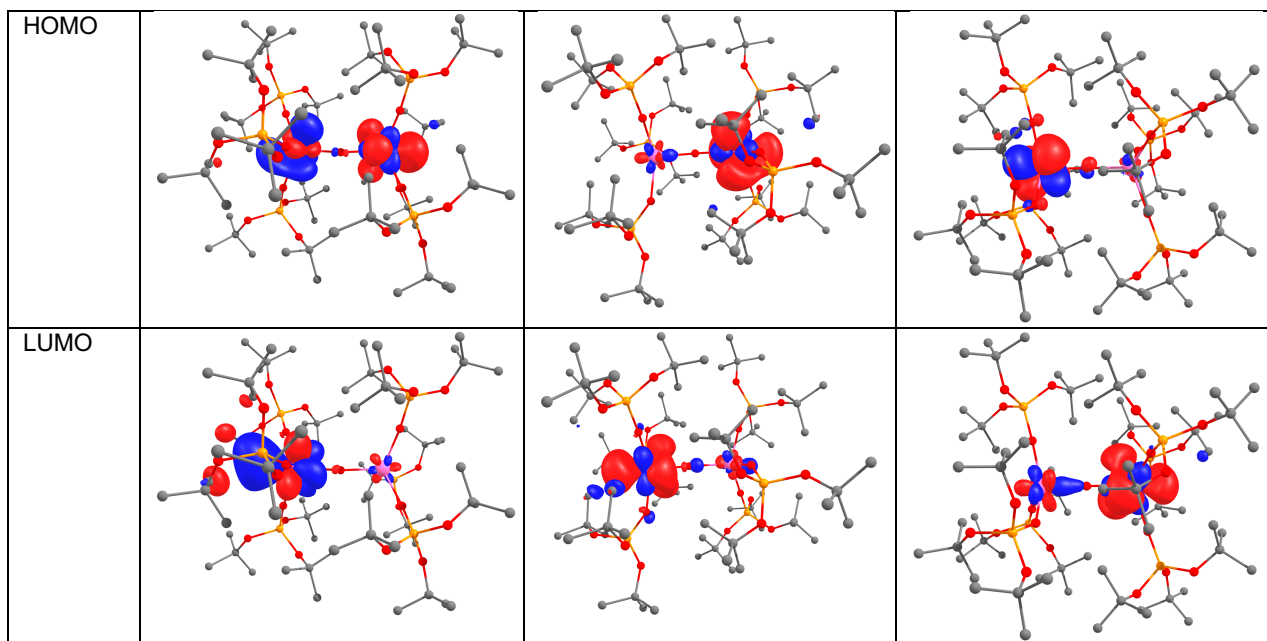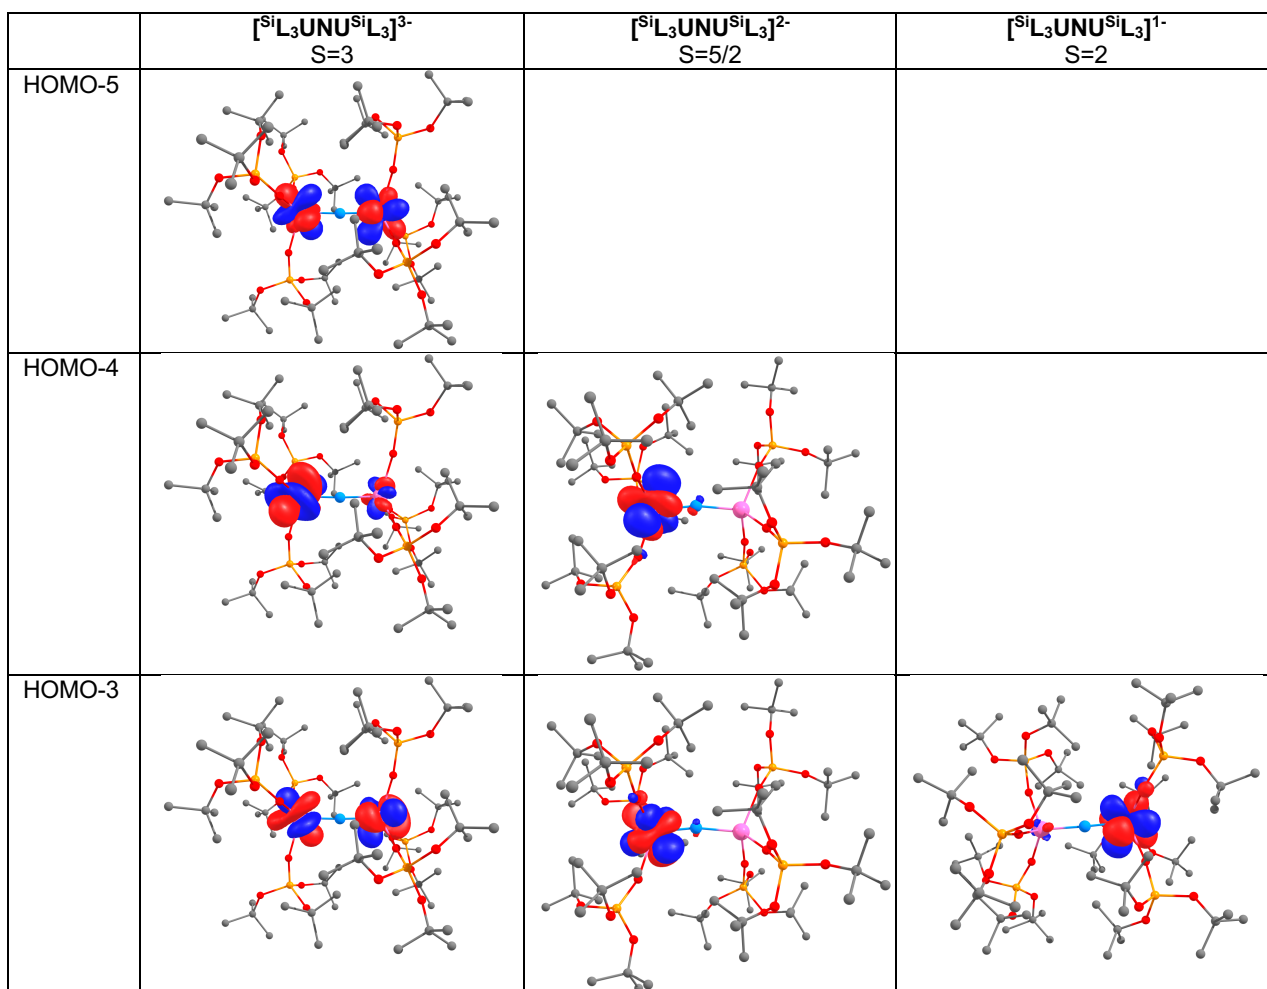



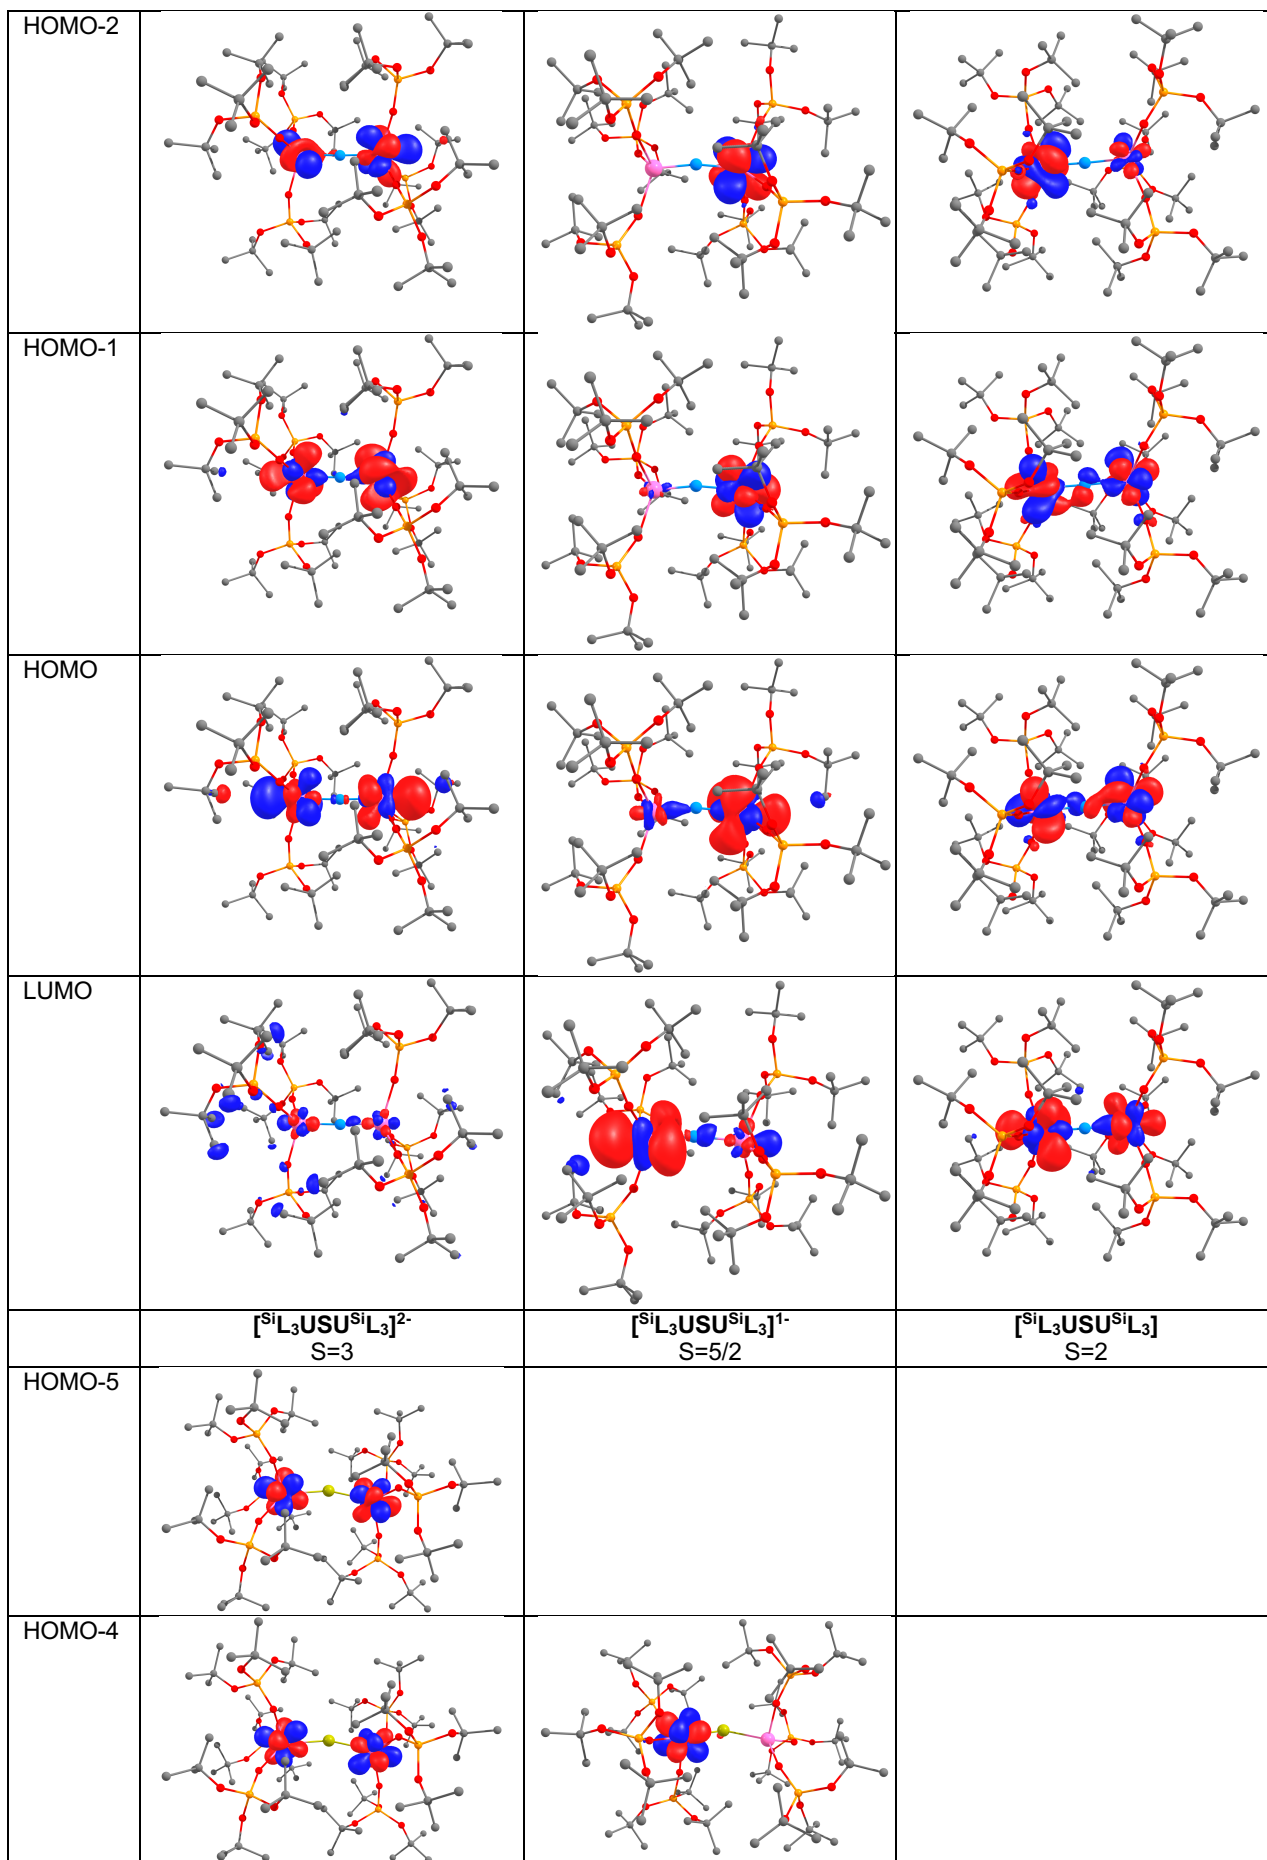

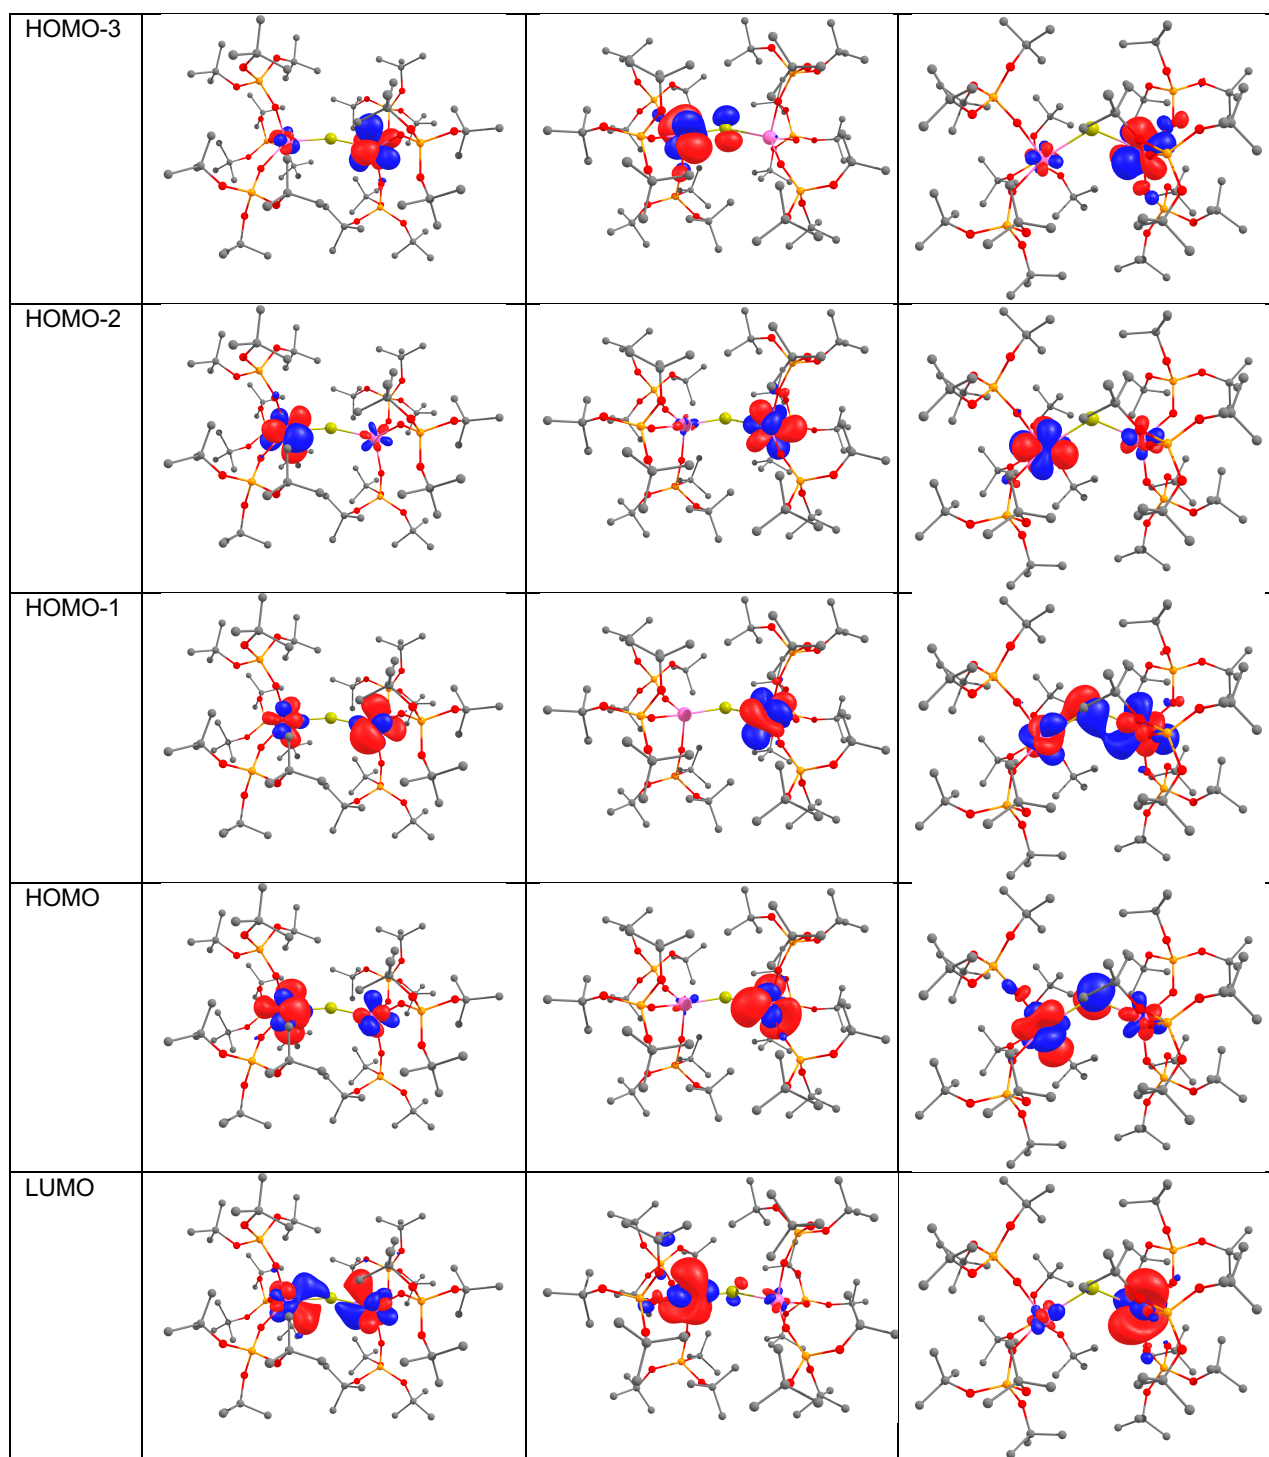

Computed natural charges for  $[\text{ArL}_3\text{UOUArL}_3]^{2-}$ ,  $[\text{ArL}_3\text{UOUArL}_3]^{1-}$ ,  $[\text{ArL}_3\text{UNUArL}_3]^{3-}$ ,  $[\text{ArL}_3\text{UNUArL}_3]^{2-}$ ,  $[\text{ArL}_3\text{USUArL}_3]^{2-}$ ,  $[\text{ArL}_3\text{USUArL}_3]^{1-}$

| Atom label | Natural charges            |                              |                       |                            |                              |                            |                            |                              |                       |
|------------|----------------------------|------------------------------|-----------------------|----------------------------|------------------------------|----------------------------|----------------------------|------------------------------|-----------------------|
|            | $[\text{UOU}]^{2-}$<br>S=3 | $[\text{UOU}]^{1-}$<br>S=5/2 | $[\text{UOU}]$<br>S=2 | $[\text{UNU}]^{3-}$<br>S=3 | $[\text{UNU}]^{2-}$<br>S=5/2 | $[\text{UNU}]^{1-}$<br>S=2 | $[\text{USU}]^{2-}$<br>S=3 | $[\text{USU}]^{1-}$<br>S=5/2 | $[\text{USU}]$<br>S=2 |
| U1         | 1.68732                    | 1.98126                      | 2.03408               | 1.50285                    | 1.78660                      | 1.90865                    | 1.50125                    | 1.64898                      | 1.73752               |
| O2         | -0.81819                   | -0.78771                     | -0.78200              | -0.79391                   | -0.78740                     | -0.78180                   | -0.81093                   | -0.75302                     | -0.74989              |
| O3         | -0.81828                   | -0.78733                     | -0.78062              | -0.79516                   | -0.78629                     | -0.78117                   | -0.81204                   | -0.75164                     | -0.74923              |
| O4         | -0.82491                   | -0.79423                     | -0.78996              | -0.79779                   | -0.78851                     | -0.78976                   | -0.82267                   | -0.78092                     | -0.78255              |
| O5/N5/S5   | -1.14755                   | -1.06431                     | -1.04504              | -1.50820                   | -1.38416                     | -1.34296                   | -0.89945                   | -0.73229                     | -0.66862              |
| U11        | 1.68737                    | 1.76429                      | 2.03940               | 1.50252                    | 1.63459                      | 1.90365                    | 1.48462                    | 1.57674                      | 1.74692               |
| O112       | -0.81821                   | -0.82814                     | -0.78349              | -0.79447                   | -0.80944                     | -0.78594                   | -0.80470                   | -0.81442                     | -0.75104              |
| O113       | -0.81831                   | -0.82709                     | -0.78371              | -0.79203                   | -0.80922                     | -0.78690                   | -0.80431                   | -0.81545                     | -0.75246              |
| O114       | -0.82492                   | -0.83512                     | -0.78899              | -0.79934                   | -0.81463                     | -0.78909                   | -0.82033                   | -0.83263                     | -0.78495              |

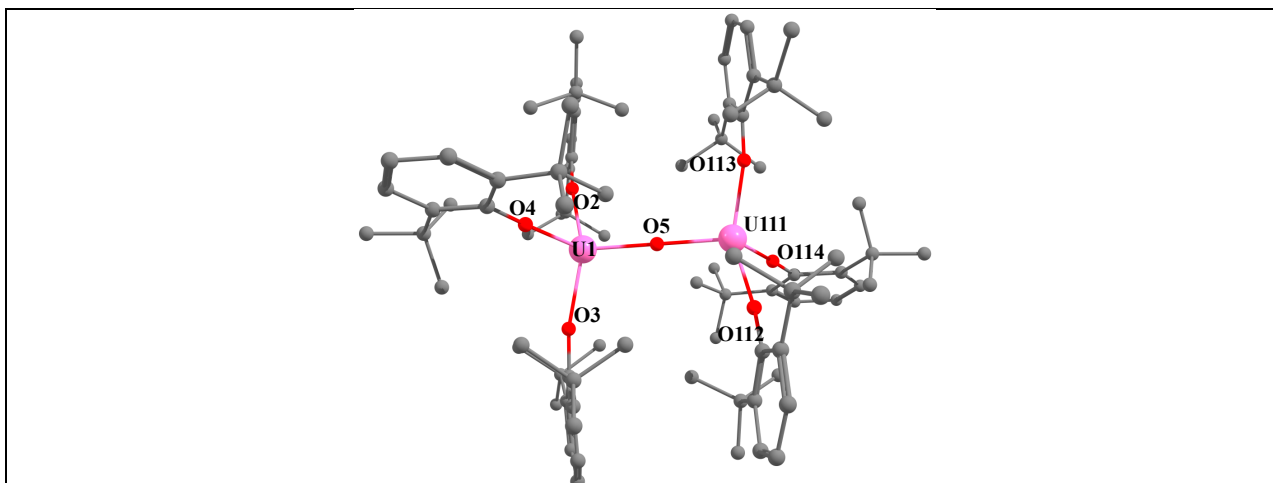

DFT computed spin densities for selected atoms in  $[\text{ArL}_3\text{UOUArL}_3]^{2-}$ ,  $[\text{ArL}_3\text{UOUArL}_3]^{1-}$ ,  $[\text{ArL}_3\text{UNUArL}_3]^{3-}$ ,  $[\text{ArL}_3\text{UNUArL}_3]^{2-}$ ,  $[\text{ArL}_3\text{USUArL}_3]^{2-}$ ,  $[\text{ArL}_3\text{USUArL}_3]^{1-}$

| Atom label | $[\text{UOU}]^{2-}$<br>S=3 | $[\text{UOU}]^{1-}$<br>S=5/2 | $[\text{UOU}]$<br>S=2 | $[\text{UNU}]^{3-}$<br>S=3 | $[\text{UNU}]^{2-}$<br>S=5/2 | $[\text{UNU}]^{1-}$<br>S=2 | $[\text{USU}]^{2-}$<br>S=3 | $[\text{USU}]^{1-}$<br>S=5/2 | $[\text{USU}]$<br>S=2 |
|------------|----------------------------|------------------------------|-----------------------|----------------------------|------------------------------|----------------------------|----------------------------|------------------------------|-----------------------|
| U1         | 3.08                       | 2.14                         | 2.12                  | 3.10                       | 2.16                         | 2.13                       | 3.13                       | 2.2                          | 2.16                  |
| O2         | -0.02                      | -0.02                        | -0.03                 | -0.02                      | -0.01                        | -0.02                      | -0.02                      | -0.03                        | -0.03                 |
| O3         | -0.02                      | -0.02                        | -0.03                 | -0.02                      | -0.01                        | -0.02                      | -0.02                      | -0.03                        | -0.04                 |
| O4         | -0.02                      | -0.02                        | -0.02                 | -0.02                      | -0.02                        | -0.02                      | -0.03                      | -0.02                        | -0.02                 |
| O5/N5/S5   | -0.10                      | -0.08                        | -0.06                 | -0.19                      | -0.17                        | -0.14                      | -0.17                      | -0.16                        | -0.10                 |
| U111       | 3.08                       | 3.06                         | 2.12                  | 3.10                       | 3.07                         | 2.13                       | 3.12                       | 3.06                         | 2.16                  |
| O112       | -0.02                      | -0.02                        | -0.03                 | -0.02                      | -0.02                        | -0.02                      | -0.02                      | -0.02                        | -0.04                 |
| O113       | -0.02                      | -0.02                        | -0.02                 | -0.02                      | -0.02                        | -0.02                      | -0.02                      | -0.02                        | -0.03                 |
| O114       | -0.02                      | -0.03                        | -0.02                 | -0.02                      | -0.02                        | -0.02                      | -0.03                      | -0.03                        | -0.02                 |

Computed Wiberg bond index for ground spin state of  $[\text{ArL}_3\text{UOUArL}_3]^{2-}$ ,  $[\text{ArL}_3\text{UOUArL}_3]^{1-}$ ,  $[\text{ArL}_3\text{UOUArL}_3]$ ,  $[\text{ArL}_3\text{UNUArL}_3]^{3-}$ ,  $[\text{ArL}_3\text{UNUArL}_3]^{2-}$ ,  $[\text{ArL}_3\text{UNUArL}_3]^{1-}$ ,  $[\text{ArL}_3\text{USUArL}_3]^{2-}$ ,  $[\text{ArL}_3\text{USUArL}_3]^{1-}$ ,  $[\text{ArL}_3\text{USUArL}_3]$

|          |                                                                                        |      |                                                                                        |      |                                                                                        |          |                                                                                        |
|----------|----------------------------------------------------------------------------------------|------|----------------------------------------------------------------------------------------|------|----------------------------------------------------------------------------------------|----------|----------------------------------------------------------------------------------------|
| U1       | 0.0000                                                                                 | U1   | 0.0000                                                                                 | U1   | 0.0000                                                                                 | U1       | 0.0000                                                                                 |
| O2       | 0.4607<br>0.6366<br>0.7111<br>0.4293<br>0.5254<br>0.6254<br>0.4936<br>0.7356<br>0.7806 | O3   | 0.4581<br>0.6443<br>0.7140<br>0.4215<br>0.5276<br>0.6259<br>0.4898<br>0.7434<br>0.7882 | O4   | 0.4893<br>0.6672<br>0.7206<br>0.4337<br>0.5655<br>0.6371<br>0.5203<br>0.7061<br>0.7328 | O5/N5/S5 | 0.7074<br>1.0663<br>0.7877<br>1.0995<br>1.6119<br>1.2155<br>0.8584<br>1.2982<br>1.0344 |
| U111     | 0.0000                                                                                 | U111 | 0.0000                                                                                 | U111 | 0.0000                                                                                 | U111     | 0.0000                                                                                 |
| O5/N5/S5 | 0.7074<br>0.4818<br>0.7847<br>1.1095<br>0.7815<br>1.2327<br>0.8861<br>0.6679<br>1.0071 | O112 | 0.4607<br>0.4978<br>0.7093<br>0.4207<br>0.4622<br>0.6067<br>0.4919<br>0.5076<br>0.8892 | O113 | 0.4581<br>0.4941<br>0.7098<br>0.4145<br>0.4631<br>0.6005<br>0.4869<br>0.5083<br>0.8854 | O114     | 0.4893<br>0.5212<br>0.7211<br>0.4400<br>0.4761<br>0.6352<br>0.5281<br>0.5501<br>0.8560 |

**Bonding orbitals from NBO analysis for ground spin state (Alpha spin orbitals, UOU core) of [ArL<sub>3</sub>UOUArL<sub>3</sub>]<sup>2-</sup>, (S=3)**

(0.92436) BD ( 1) U 1- O 5  
( 7.65%) 0.2766\* U 1 s( 0.05%)p 8.95( 0.41%)d99.99( 65.46%)f99.99( 34.05%)g 0.53( 0.02%)  
( 92.35%) 0.9610\* O 5 s( 0.00%)p 1.00(100.00%)d 0.00( 0.00%)  
(0.95250) BD ( 1) O 5- U111  
( 94.61%) 0.9727\* O 5 s( 99.95%)p 0.00( 0.02%)d 0.00( 0.02%)  
( 5.39%) 0.2321\* U111 s( 7.99%)p 0.04( 0.33%)d 9.50( 75.86%)f 1.98( 15.80%)g 0.00( 0.03%)  
(0.92377) BD ( 2) O 5- U111  
( 92.53%) 0.9619\* O 5 s( 0.02%)p99.99( 99.98%)d 0.00( 0.00%)  
( 7.47%) 0.2734\* U111 s( 0.01%)p 1.00( 0.38%)d99.99( 62.33%)f99.21( 37.26%)g 0.06( 0.02%)

**Bonding orbitals from NBO analysis for ground spin state (Alpha spin orbitals, UOU core) of [ArL<sub>3</sub>UOUArL<sub>3</sub>]<sup>1-</sup>, (S=5/2)**

(0.98841) BD ( 1) U 1- O 5  
( 10.68%) 0.3269\* U 1 s( 0.18%)p 4.11( 0.76%)d99.99( 46.70%)f99.99( 52.25%)g 0.60( 0.11%)  
( 89.32%) 0.9451\* O 5 s( 46.82%)p 1.13( 53.14%)d 0.00( 0.04%)  
(0.94954) BD ( 2) U 1- O 5  
( 10.69%) 0.3269\* U 1 s( 0.07%)p 4.71( 0.34%)d99.99( 54.23%)f99.99( 45.27%)g 1.18( 0.09%)  
( 89.31%) 0.9451\* O 5 s( 0.03%)p99.99( 99.96%)d 0.62( 0.02%)  
(0.94697) BD ( 3) U 1- O 5  
( 10.47%) 0.3236\* U 1 s( 0.01%)p 1.00( 0.32%)d99.99( 55.25%)f99.99( 44.34%)g 0.27( 0.08%)  
( 89.53%) 0.9462\* O 5 s( 0.00%)p 1.00( 99.98%)d 0.00( 0.01%)  
(0.97879) BD ( 1) O 5- U111  
( 82.72%) 0.9095\* O 5 s( 53.11%)p 0.88( 46.89%)d 0.00( 0.01%)  
( 17.28%) 0.4156\* U111 s( 0.15%)p 0.60( 0.09%)d99.99( 21.93%)f99.99( 77.81%)g 0.14( 0.02%)

**Bonding orbitals from NBO analysis for ground spin state (Alpha spin orbitals, UOU core) of [ArL<sub>3</sub>UOUArL<sub>3</sub>], (S=2)**

(0.98350) BD ( 1) U 1- O 5  
( 8.90%) 0.2984\* U 1 s( 0.56%)p 0.66( 0.37%)d95.00( 53.56%)f80.56( 45.42%)g 0.14( 0.08%)  
( 91.10%) 0.9544\* O 5 s( 50.21%)p 0.99( 49.77%)d 0.00( 0.01%)  
(0.98378) BD ( 1) O 5- U111  
( 91.03%) 0.9541\* O 5 s( 49.76%)p 1.01( 50.23%)d 0.00( 0.01%)  
( 8.97%) 0.2994\* U111 s( 0.49%)p 0.74( 0.36%)d99.99( 53.90%)f92.05( 45.18%)g 0.15( 0.07%)

**Bonding orbitals from NBO analysis for ground spin state (Alpha spin orbitals, UNU core) of [ArL<sub>3</sub>UNUArL<sub>3</sub>]<sup>3-</sup>, (S=3)**

(0.97205) BD ( 1) U 1- N 5  
( 13.36%) 0.3654\* U 1 s( 7.60%)p 0.18( 1.36%)d 9.66( 73.36%)f 2.32( 17.62%)g 0.01( 0.06%)  
( 86.64%) 0.9308\* N 5 s( 49.92%)p 1.00( 50.07%)d 0.00( 0.01%)  
(0.86875) BD ( 2) U 1- N 5  
( 13.87%) 0.3725\* U 1 s( 0.41%)p 0.78( 0.32%)d99.99( 66.88%)f78.08( 32.37%)g 0.04( 0.02%)  
( 86.13%) 0.9280\* N 5 s( 1.80%)p54.61( 98.20%)d 0.00( 0.00%)  
(0.96806) BD ( 1) N 5- U111  
( 86.46%) 0.9298\* N 5 s( 47.99%)p 1.08( 52.00%)d 0.00( 0.02%)  
( 13.54%) 0.3679\* U111 s( 8.16%)p 0.21( 1.75%)d 9.72( 79.25%)f 1.32( 10.78%)g 0.01( 0.06%)  
(0.86833) BD ( 2) N 5- U111  
( 86.19%) 0.9284\* N 5 s( 0.27%)p99.99( 99.73%)d 0.00( 0.00%)  
( 13.81%) 0.3716\* U111 s( 0.06%)p 4.62( 0.29%)d99.99( 65.15%)f99.99( 34.49%)g 0.24( 0.01%)

**Bonding orbitals from NBO analysis for ground spin state (Alpha spin orbitals, UNU core) of [ArL<sub>3</sub>UNUArL<sub>3</sub>]<sup>2-</sup>, (S=5/2)**

(0.98454) BD ( 1) U 1- N 5  
( 20.47%) 0.4525\* U 1 s( 0.26%)p 2.62( 0.68%)d99.99( 50.41%)f99.99( 48.60%)g 0.18( 0.05%)  
( 79.53%) 0.8918\* N 5 s( 42.39%)p 1.36( 57.56%)d 0.00( 0.06%)  
(0.91792) BD ( 2) U 1- N 5  
( 19.93%) 0.4465\* U 1 s( 0.01%)p 1.00( 0.11%)d99.99( 54.40%)f99.99( 45.45%)g 0.23( 0.03%)  
( 80.07%) 0.8948\* N 5 s( 0.12%)p99.99( 99.86%)d 0.14( 0.02%)  
(0.91604) BD ( 3) U 1- N 5  
( 19.61%) 0.4429\* U 1 s( 0.00%)p 1.00( 0.14%)d99.99( 51.82%)f99.99( 48.01%)g 0.17( 0.02%)  
( 80.39%) 0.8966\* N 5 s( 0.04%)p99.99( 99.95%)d 0.44( 0.02%)  
(0.96509) BD ( 1) N 5- U111

( 88.66%) 0.9416\* N 5 s( 57.48%)p 0.74( 42.52%)d 0.00( 0.00%)  
 ( 11.34%) 0.3368\* U111 s( 11.11%)p 0.09( 0.97%)d 7.09( 78.77%)f 0.82( 9.10%)g 0.00( 0.05%)

**Bonding orbitals from NBO analysis for ground spin state (Alpha spin orbitals, UNU core) of  $[\text{ArL}_3\text{UNUArL}_3]^-$ , (S=2)**

(0.96964) BD ( 1) U 1- N 5  
 ( 14.08%) 0.3752\* U 1 s( 5.93%)p 0.16( 0.94%)d10.71( 63.57%) f 4.97( 29.49%)g 0.01( 0.07%)  
 ( 85.92%) 0.9270\* N 5 s( 54.15%)p 0.85( 45.84%)d 0.00( 0.01%)  
 (0.98035) BD ( 1) N 5- U111  
 ( 82.71%) 0.9094\* N 5 s( 45.68%)p 1.19( 54.29%)d 0.00( 0.02%)  
 ( 17.29%) 0.4159\* U111 s( 0.67%)p 0.73( 0.49%)d78.10( 52.45%) f69.00( 46.34%)g 0.07( 0.05%)

**Bonding orbitals from NBO analysis for ground spin state (Alpha spin orbitals, USU core) of  $[\text{ArL}_3\text{USUArL}_3]^{2-}$ , (S=3)**

(0.97918) BD ( 1) U 1- S 5  
 ( 11.14%) 0.3338\* U 1 s( 19.02%)p 0.03( 0.54%)d 3.15( 59.90%)f 1.08( 20.51%)g 0.00( 0.02%)  
 ( 88.86%) 0.9426\* S 5 s( 50.37%)p 0.99( 49.62%)d 0.00( 0.02%)  
 (0.97792) BD ( 1) S 5- U111  
 ( 88.92%) 0.9430\* S 5 s( 49.54%)p 1.02( 50.44%)d 0.00( 0.01%)  
 ( 11.08%) 0.3329\* U111 s( 25.75%)p 0.04( 0.91%)d 2.53( 65.22%)f 0.31( 8.09%)g 0.00( 0.03%)

**Bonding orbitals from NBO analysis for ground spin state (Alpha spin orbitals, USU core) of  $[\text{ArL}_3\text{USUArL}_3]^{1-}$ , (S=5/2)**

(0.98212) BD ( 1) U 1- S 5  
 ( 15.83%) 0.3979\* U 1 s( 5.64%)p 0.07( 0.38%)d12.83( 72.42%)f 3.82( 21.55%)g 0.00( 0.02%)  
 ( 84.17%) 0.9174\* S 5 s( 45.81%)p 1.18( 54.16%)d 0.00( 0.03%)  
 (0.94026) BD ( 2) U 1- S 5  
 ( 14.49%) 0.3807\* U 1 s( 0.03%)p 9.37( 0.26%)d99.99( 59.00%)f99.99( 40.71%)g 0.26( 0.01%)  
 ( 85.51%) 0.9247\* S 5 s( 0.02%)p99.99( 99.97%)d 0.61( 0.01%)  
 (0.93534) BD ( 3) U 1- S 5  
 ( 13.13%) 0.3623\* U 1 s( 0.07%)p 2.18( 0.15%)d99.99( 44.38%)f99.99( 55.38%)g 0.20( 0.01%)  
 ( 86.87%) 0.9321\* S 5 s( 0.22%)p99.99( 99.78%)d 0.03( 0.01%)  
 (0.97899) BD ( 1) S 5- U111  
 ( 89.82%) 0.9477\* S 5 s( 53.93%)p 0.85( 46.06%)d 0.00( 0.01%)  
 ( 10.18%) 0.3191\* U111 s( 12.01%)p 0.03( 0.42%)d 6.75( 81.04%)f 0.54( 6.51%)g 0.00( 0.01%)

**Bonding orbitals from NBO analysis for ground spin state (Alpha spin orbitals, USU core) of  $[\text{ArL}_3\text{USUArL}_3]$ , (S=2)**

(0.97062) BD ( 1) U 1- S 5  
 ( 13.41%) 0.3662\* U 1 s( 20.48%)p 0.02( 0.50%)d 3.07( 62.96%) f 0.78( 16.01%)g 0.00( 0.05%)  
 ( 86.59%) 0.9305\* S 5 s( 49.97%)p 1.00( 50.01%)d 0.00( 0.03%)  
 (0.97243) BD ( 1) S 5- U111  
 ( 86.47%) 0.9299\* S 5 s( 49.65%)p 1.01( 50.32%)d 0.00( 0.02%)  
 ( 13.53%) 0.3678\* U111 s( 11.51%)p 0.03( 0.40%)d 6.56( 75.54%) f 1.09( 12.52%)g 0.00( 0.03%)

DFT computed NBO second order perturbation analysis for UOU core in  $[\text{ArL}_3\text{UOUArL}_3]^{2-}$

| Donor NBO                                                                                                                                                                                    | Acceptor NBO                                                                                   | E(2)<br>kcal/mol |
|----------------------------------------------------------------------------------------------------------------------------------------------------------------------------------------------|------------------------------------------------------------------------------------------------|------------------|
| (0.92966) LP ( 1) O 5<br>s( 0.00%)p 1.00(100.00%)d 0.00( 0.00%)                                                                                                                              | (0.10854) LV ( 1) U 1<br>s( 2.02%)p 0.46( 0.92%)d44.28( 89.65%)f<br>3.64( 7.38%)g 0.01( 0.02%) | 4.47             |
| (0.92436) BD ( 1) U 1- O 5<br>( 7.65%) 0.2766* U 1 s( 0.05%)p 8.95( 0.41%)d99.99( 65.46%)f99.99( 34.05%)g<br>0.53( 0.02%)<br>( 92.35%) 0.9610* O 5 s( 0.00%)p<br>1.00(100.00%)d 0.00( 0.00%) | (0.09728) LV ( 2) U111<br>s( 0.05%)p 5.88( 0.31%)d99.99( 87.80%)f99.99( 11.84%)g 0.16( 0.01%)  | 8.51             |
| (0.95250) BD ( 1) O 5- U111<br>( 94.61%) 0.9727* O 5 s( 99.95%)p 0.00( 0.02%)d 0.00( 0.02%)                                                                                                  | (0.10854) LV ( 1) U 1<br>s( 2.02%)p 0.46( 0.92%)d44.28( 89.65%)f<br>3.64( 7.38%)g 0.01( 0.02%) | 39.60            |

|                                                                                                                                                                                          |                                                                                             |       |
|------------------------------------------------------------------------------------------------------------------------------------------------------------------------------------------|---------------------------------------------------------------------------------------------|-------|
| ( 5.39%) 0.2321* U111 s( 7.99%)p 0.04( 0.33%)d 9.50( 75.86%)f 1.98( 15.80%)g 0.00( 0.03%)                                                                                                |                                                                                             |       |
| (0.92377) BD ( 2) O 5- U111<br>( 92.53%) 0.9619* O 5 s( 0.02%)p99.99( 99.98%)d 0.00( 0.00%)<br>( 7.47%) 0.2734* U111 s( 0.01%)p 1.00( 0.38%)d99.99( 62.33%)f99.21( 37.26%)g 0.06( 0.02%) | (0.10606) LV ( 2) U 1<br>s( 0.04%)p 2.39( 0.10%)d99.99( 93.78%)f99.99( 6.07%)g 0.03( 0.00%) | 13.78 |

DFT computed NBO second order perturbation analysis for UOU core in  $[\text{ArL}_3\text{UOUArL}_3]^{1-}$

| Donor NBO                                                                                                                                                                                  | Acceptor NBO                                                                                  | E(2)<br>kcal/mol |
|--------------------------------------------------------------------------------------------------------------------------------------------------------------------------------------------|-----------------------------------------------------------------------------------------------|------------------|
| (0.98841) BD ( 1) U 1- O 5<br>( 10.68%) 0.3269* U 1 s( 0.18%)p 4.11( 0.76%)d99.99( 46.70%)f99.99( 52.25%)g 0.60( 0.11%)<br>( 89.32%) 0.9451* O 5 s( 46.82%)p 1.13( 53.14%)d 0.00( 0.04%)   | (0.20431) LV ( 1) U111<br>s( 7.00%)p 0.09( 0.66%)d 9.23( 64.58%)f 3.96( 27.72%)g 0.01( 0.04%) | 5.30             |
| (0.94954) BD ( 2) U 1- O 5<br>( 10.69%) 0.3269* U 1 s( 0.07%)p 4.71( 0.34%)d99.99( 54.23%)f99.99( 45.27%)g 1.18( 0.09%)<br>( 89.31%) 0.9451* O 5 s( 0.03%)p99.99( 99.96%)d 0.62( 0.02%)    | (0.08544) LV ( 4) U111<br>s( 0.05%)p 4.62( 0.23%)d99.99( 66.53%)f99.99( 33.18%)g 0.25( 0.01%) | 3.62             |
| (0.94697) BD ( 3) U 1- O 5<br>( 10.47%) 0.3236* U 1 s( 0.01%)p 1.00( 0.32%)d99.99( 55.25%)f99.99( 44.34%)g 0.27( 0.08%)<br>( 89.53%) 0.9462* O 5 s( 0.00%)p 1.00( 99.98%)d 0.00( 0.01%)    | (0.08566) LV ( 3) U111<br>s( 0.02%)p 9.89( 0.21%)d99.99( 69.07%)f99.99( 30.68%)g 0.54( 0.01%) | 3.30             |
| (0.97879) BD ( 1) O 5- U111<br>( 82.72%) 0.9095* O 5 s( 53.11%)p 0.88( 46.89%)d 0.00( 0.01%)<br>( 17.28%) 0.4156* U111 s( 0.15%)p 0.60( 0.09%)d99.99( 21.93%)f99.99( 77.81%)g 0.14( 0.02%) | (0.20431) LV ( 1) U111<br>s( 7.00%)p 0.09( 0.66%)d 9.23( 64.58%)f 3.96( 27.72%)g 0.01( 0.04%) | 10.56            |

DFT computed NBO second order perturbation analysis for UOU core in  $[\text{ArL}_3\text{UOUArL}_3]$

| Donor NBO                                                       | Acceptor NBO                                                                                  | E(2)<br>kcal/mol |
|-----------------------------------------------------------------|-----------------------------------------------------------------------------------------------|------------------|
| (0.85318) LP ( 1) O 5<br>s( 0.00%)p 1.00(100.00%)d 0.00( 0.00%) | (0.06331) LV ( 2) U 1<br>s( 0.15%)p 1.25( 0.19%)d96.63( 14.30%)f99.99( 85.28%)g 0.62( 0.09%)  | 4.48             |
| (0.85318) LP ( 1) O 5<br>s( 0.00%)p 1.00(100.00%)d 0.00( 0.00%) | (0.05793) LV ( 3) U 1<br>s( 0.80%)p 0.40( 0.32%)d29.20( 23.36%)f94.27( 75.40%)g 0.15( 0.12%)  | 7.50             |
| (0.85318) LP ( 1) O 5<br>s( 0.00%)p 1.00(100.00%)d 0.00( 0.00%) | (0.06173) LV ( 2) U111<br>s( 0.02%)p 6.54( 0.13%)d99.99( 8.84%)f99.99( 90.92%)g 4.37( 0.09%)  | 4.17             |
| (0.85318) LP ( 1) O 5<br>s( 0.00%)p 1.00(100.00%)d 0.00( 0.00%) | (0.05715) LV ( 3) U111<br>s( 0.06%)p 7.67( 0.48%)d99.99( 26.30%)f99.99( 73.04%)g 1.85( 0.12%) | 8.50             |
| (0.85217) LP ( 2) O 5<br>s( 0.00%)p 1.00(100.00%)d 0.00( 0.00%) | (0.13481) LV ( 1) U111<br>s( 0.00%)p 0.00( 0.01%)d 1.00( 95.46%)f 0.05( 4.52%)g 0.00( 0.00%)  | 10.21            |

DFT computed NBO second order perturbation analysis for UNU core in  $[\text{ArL}_3\text{UNU}^{\text{Ar}}\text{L}_3]^{3-}$ 

| Donor NBO                                                                                                                                                                                           | Acceptor NBO                                                                                      | E(2)<br>kcal/mol |
|-----------------------------------------------------------------------------------------------------------------------------------------------------------------------------------------------------|---------------------------------------------------------------------------------------------------|------------------|
| (0.97205) BD ( 1) U 1- N 5<br>( 13.36%) 0.3654* U 1 s( 7.60%)p 0.18(<br>1.36%)d 9.66( 73.36%)f 2.32( 17.62%)g<br>0.01( 0.06%)<br>( 86.64%) 0.9308* N 5 s( 49.92%)p 1.00(<br>50.07%)d 0.00( 0.01%)   | (0.01052) LV ( 8) U111<br>s( 11.31%)p 0.84( 9.55%)d 2.11( 23.90%)f<br>4.88( 55.20%)g 0.00( 0.05%) | 4.34             |
| (0.96806) BD ( 1) N 5- U111<br>( 86.46%) 0.9298* N 5 s( 47.99%)p 1.08(<br>52.00%)d 0.00( 0.02%)<br>( 13.54%) 0.3679* U111 s( 8.16%)p 0.21(<br>1.75%)d 9.72( 79.25%)f 1.32( 10.78%)g<br>0.01( 0.06%) | (0.01712) LV ( 8) U 1<br>s( 7.51%)p 0.18( 1.35%)d 3.41( 25.64%)f<br>8.70( 65.37%)g 0.02( 0.12%)   | 4.55             |
| (0.86833) BD ( 2) N 5- U111<br>( 86.19%) 0.9284* N 5 s( 0.27%)p99.99(<br>99.73%)d 0.00( 0.00%)<br>( 13.81%) 0.3716* U111 s( 0.06%)p 4.62(<br>0.29%)d99.99( 65.15%)f99.99( 34.49%)g<br>0.24( 0.01%)  | (0.14159) LV ( 1) U 1<br>s( 0.04%)p 3.54( 0.16%)d99.99(<br>79.99%)f99.99( 19.80%)g 0.11( 0.00%)   | 23.24            |

DFT computed NBO second order perturbation analysis for UNU core in  $[\text{ArL}_3\text{UNU}^{\text{Ar}}\text{L}_3]^{2-}$ 

| Donor NBO                                                                                                                                                                                           | Acceptor NBO                                                                                     | E(2)<br>kcal/mol |
|-----------------------------------------------------------------------------------------------------------------------------------------------------------------------------------------------------|--------------------------------------------------------------------------------------------------|------------------|
| (0.91792) BD ( 2) U 1- N 5<br>( 19.93%) 0.4465* U 1 s( 0.01%)p 1.00(<br>0.11%)d99.99( 54.40%)f99.99( 45.45%)g<br>0.23( 0.03%)<br>( 80.07%) 0.8948* N 5 s( 0.12%)p99.99(<br>99.86%)d 0.14( 0.02%)    | (0.09999) LV ( 2) U111<br>s( 0.03%)p 5.77( 0.15%)d99.99(<br>89.70%)f99.99( 10.13%)g 0.15( 0.00%) | 7.25             |
| (0.91604) BD ( 3) U 1- N 5<br>( 19.61%) 0.4429* U 1 s( 0.00%)p 1.00(<br>0.14%)d99.99( 51.82%)f99.99( 48.01%)g<br>0.17( 0.02%)<br>( 80.39%) 0.8966* N 5 s( 0.04%)p99.99(<br>99.95%)d 0.44( 0.02%)    | (0.10994) LV ( 1) U111<br>s( 0.01%)p 1.00( 0.06%)d99.99(<br>93.98%)f92.41( 5.95%)g 0.01( 0.00%)  | 8.98             |
| (0.96509) BD ( 1) N 5- U111<br>( 88.66%) 0.9416* N 5 s( 57.48%)p 0.74(<br>42.52%)d 0.00( 0.00%)<br>( 11.34%) 0.3368* U111 s( 11.11%)p 0.09(<br>0.97%)d 7.09( 78.77%)f 0.82( 9.10%)g<br>0.00( 0.05%) | (0.10833) LV ( 2) U 1<br>s( 2.01%)p 0.16( 0.32%)d33.58(<br>67.45%)f15.04( 30.22%)g 0.00( 0.01%)  | 5.67             |
| (0.96509) BD ( 1) N 5- U111<br>( 88.66%) 0.9416* N 5 s( 57.48%)p 0.74(<br>42.52%)d 0.00( 0.00%)<br>( 11.34%) 0.3368* U111 s( 11.11%)p 0.09(<br>0.97%)d 7.09( 78.77%)f 0.82( 9.10%)g<br>0.00( 0.05%) | (0.04880) LV ( 6) U 1<br>s( 77.49%)p 0.02( 1.78%)d 0.06( 4.57%)f<br>0.21( 16.15%)g 0.00( 0.01%)  | 3.15             |

DFT computed NBO second order perturbation analysis for UNU core in  $[\text{ArL}_3\text{UNU}^{\text{Ar}}\text{L}_3]^{1-}$ 

| Donor NBO                                                       | Acceptor NBO                                                                                     | E(2)<br>kcal/mol |
|-----------------------------------------------------------------|--------------------------------------------------------------------------------------------------|------------------|
| (0.73688) LP ( 1) N 5<br>s( 0.14%)p99.99( 99.86%)d 0.00( 0.00%) | (0.05823) LV ( 3) U 1<br>s( 52.46%)p 0.01( 0.54%)d 0.39( 20.56%)f<br>0.50( 26.27%)g 0.00( 0.17%) | 3.52             |
| (0.73688) LP ( 1) N 5<br>s( 0.14%)p99.99( 99.86%)d 0.00( 0.00%) | (0.09225) LV ( 2) U111<br>s( 1.15%)p 0.72( 0.82%)d27.56(<br>31.58%)f57.90( 66.35%)g 0.09( 0.10%) | 23.52            |
| (0.73171) LP ( 2) N 5<br>s( 0.00%)p 1.00(100.00%)d 0.00( 0.00%) | (0.13811) LV ( 1) U 1                                                                            | 23.26            |

|                                                                                                                                                                                           |                                                                                               |       |
|-------------------------------------------------------------------------------------------------------------------------------------------------------------------------------------------|-----------------------------------------------------------------------------------------------|-------|
|                                                                                                                                                                                           | s( 0.01%)p 1.00( 0.09%)d99.99( 85.90%)f99.99( 14.00%)g 0.08( 0.01%)                           |       |
| (0.73171) LP ( 2) N 5<br>s( 0.00%)p 1.00(100.00%)d 0.00( 0.00%)                                                                                                                           | (0.13569) LV ( 1) U111<br>s( 0.00%)p 1.00( 0.08%)d99.99( 86.86%)f99.99( 13.05%)g 0.09( 0.01%) | 22.59 |
| (0.73171) LP ( 2) N 5<br>s( 0.00%)p 1.00(100.00%)d 0.00( 0.00%)                                                                                                                           | (0.06531) LV ( 3) U111<br>s( 0.02%)p 7.44( 0.12%)d99.99( 5.88%)f99.99( 93.90%)g 5.37( 0.08%)  | 4.13  |
| (0.96964) BD ( 1) U 1- N 5<br>( 14.08%) 0.3752* U 1 s( 5.93%)p 0.16( 0.94%)d10.71( 63.57%) f 4.97( 29.49%)g 0.01( 0.07%)<br>( 85.92%) 0.9270* N 5 s( 54.15%)p 0.85( 45.84%)d 0.00( 0.01%) | (0.03896) LV ( 4) U111<br>s( 88.00%)p 0.01( 0.69%)d 0.08( 6.77%)f 0.05( 4.53%)g 0.00( 0.01%)  | 4.91  |

DFT computed NBO second order perturbation analysis for USU core in  $[^{\text{Ar}}\text{L}_3\text{USU}^{\text{Ar}}\text{L}_3]^2-$

| Donor NBO                                                       | Acceptor NBO                                                                                 | E(2)<br>kcal/mol |
|-----------------------------------------------------------------|----------------------------------------------------------------------------------------------|------------------|
| (0.84555) LP ( 1) S 5<br>s( 0.05%)p99.99( 99.95%)d 0.01( 0.00%) | (0.11911) LV ( 1) U 1<br>s( 0.07%)p 0.25( 0.02%)d99.99( 95.75%)f56.13( 4.15%)g 0.01( 0.00%)  | 13.14            |
| (0.84555) LP ( 1) S 5<br>s( 0.05%)p99.99( 99.95%)d 0.01( 0.00%) | (0.12209) LV ( 1) U111<br>s( 0.00%)p 1.00( 0.03%)d99.99( 95.54%)f99.99( 4.43%)g 0.04( 0.00%) | 14.39            |

DFT computed NBO second order perturbation analysis for USU core in  $[^{\text{Ar}}\text{L}_3\text{USU}^{\text{Ar}}\text{L}_3]^1-$

| Donor NBO                                                                                                                                                                                  | Acceptor NBO                                                                                 | E(2)<br>kcal/mol |
|--------------------------------------------------------------------------------------------------------------------------------------------------------------------------------------------|----------------------------------------------------------------------------------------------|------------------|
| (0.94026) BD ( 2) U 1- S 5<br>( 14.49%) 0.3807* U 1 s( 0.03%)p 9.37( 0.26%)d99.99( 59.00%)f99.99( 40.71%)g 0.26( 0.01%)<br>( 85.51%) 0.9247* S 5 s( 0.02%)p99.99( 99.97%)d 0.61( 0.01%)    | (0.09313) LV ( 3) U111<br>s( 0.00%)p 1.00( 0.45%)d99.99( 93.58%)f13.19( 5.95%)g 0.04( 0.02%) | 4.32             |
| (0.93534) BD ( 3) U 1- S 5<br>( 13.13%) 0.3623* U 1 s( 0.07%)p 2.18( 0.15%)d99.99( 44.38%)f99.99( 55.38%)g 0.20( 0.01%)<br>( 86.87%) 0.9321* S 5 s( 0.22%)p99.99( 99.78%)d 0.03( 0.01%)    | (0.11402) LV ( 1) U111<br>s( 0.03%)p 0.21( 0.01%)d99.99( 97.93%)f80.09( 2.03%)g 0.11( 0.00%) | 7.48             |
| (0.97899) BD ( 1) S 5- U111<br>( 89.82%) 0.9477* S 5 s( 53.93%)p 0.85( 46.06%)d 0.00( 0.01%)<br>( 10.18%) 0.3191* U111 s( 12.01%)p 0.03( 0.42%)d 6.75( 81.04%)f 0.54( 6.51%)g 0.00( 0.01%) | (0.04398) LV ( 4) U 1<br>s( 87.20%)p 0.00( 0.09%)d 0.09( 7.94%)f 0.05( 4.71%)g 0.00( 0.06%)  | 4.83             |

DFT computed NBO second order perturbation analysis for USU core in  $[^{\text{Ar}}\text{L}_3\text{USU}^{\text{Ar}}\text{L}_3]$

| Donor NBO                                                                                                                                                                                  | Acceptor NBO                                                                                  | E(2)<br>kcal/mol |
|--------------------------------------------------------------------------------------------------------------------------------------------------------------------------------------------|-----------------------------------------------------------------------------------------------|------------------|
| (0.97062) BD ( 1) U 1- S 5<br>( 13.41%) 0.3662* U 1 s( 20.48%)p 0.02( 0.50%)d 3.07( 62.96%) f 0.78( 16.01%)g 0.00( 0.05%)<br>( 86.59%) 0.9305* S 5 s( 49.97%)p 1.00( 50.01%)d 0.00( 0.03%) | (0.04787) LV ( 2) U111<br>s( 67.45%)p 0.00( 0.12%)d 0.37( 24.81%)f 0.11( 7.53%)g 0.00( 0.10%) | 4.62             |
| (0.97062) BD ( 1) U 1- S 5<br>( 13.41%) 0.3662* U 1 s( 20.48%)p 0.02( 0.50%)d 3.07( 62.96%) f 0.78( 16.01%)g 0.00( 0.05%)                                                                  | (0.04101) BD*( 1) S 5- U111<br>( 13.53%) 0.3678* S 5 s( 49.65%)p 1.01( 50.32%)d 0.00( 0.02%)  | 2.51             |



|                                                                                                                                                                                              |                                                                                                                          |      |
|----------------------------------------------------------------------------------------------------------------------------------------------------------------------------------------------|--------------------------------------------------------------------------------------------------------------------------|------|
| ( 86.59%) 0.9305* S 5 s( 49.97%)p 1.00( 50.01%)d 0.00( 0.03%)                                                                                                                                | ( 86.47%) -0.9299* U111 s( 11.51%)p 0.03( 0.40%)d 6.56( 75.54%)f 1.09( 12.52%)g 0.00( 0.03%)                             |      |
| (0.97243) BD ( 1) S 5- U111<br>( 86.47%) 0.9299* S 5 s( 49.65%)p 1.01( 50.32%)d 0.00( 0.02%)<br>( 13.53%) 0.3678* U111 s( 11.51%)p 0.03( 0.40%)d 6.56( 75.54%) f 1.09( 12.52%)g 0.00( 0.03%) | (0.03386) BD*( 1) U 1- S 5<br>( 86.59%) 0.9305* U 1 s( 20.48%)p 0.02( 0.50%)d 3.07( 62.96%)f 0.78( 16.01%)g 0.00( 0.05%) | 2.67 |

DFT computed MOs (Alpha spin orbitals) for ground spin state

|        | $[\text{ArL}_3\text{UOUArL}_3]^{2-}$<br>S=3 | $[\text{ArL}_3\text{UOUArL}_3]^{1-}$<br>S=5/2 | $[\text{ArL}_3\text{UOUArL}_3]$<br>S=2 |
|--------|---------------------------------------------|-----------------------------------------------|----------------------------------------|
| HOMO-5 |                                             |                                               |                                        |
| HOMO-4 |                                             |                                               |                                        |
| HOMO-3 |                                             |                                               |                                        |
| HOMO-2 |                                             |                                               |                                        |
| HOMO-1 |                                             |                                               |                                        |

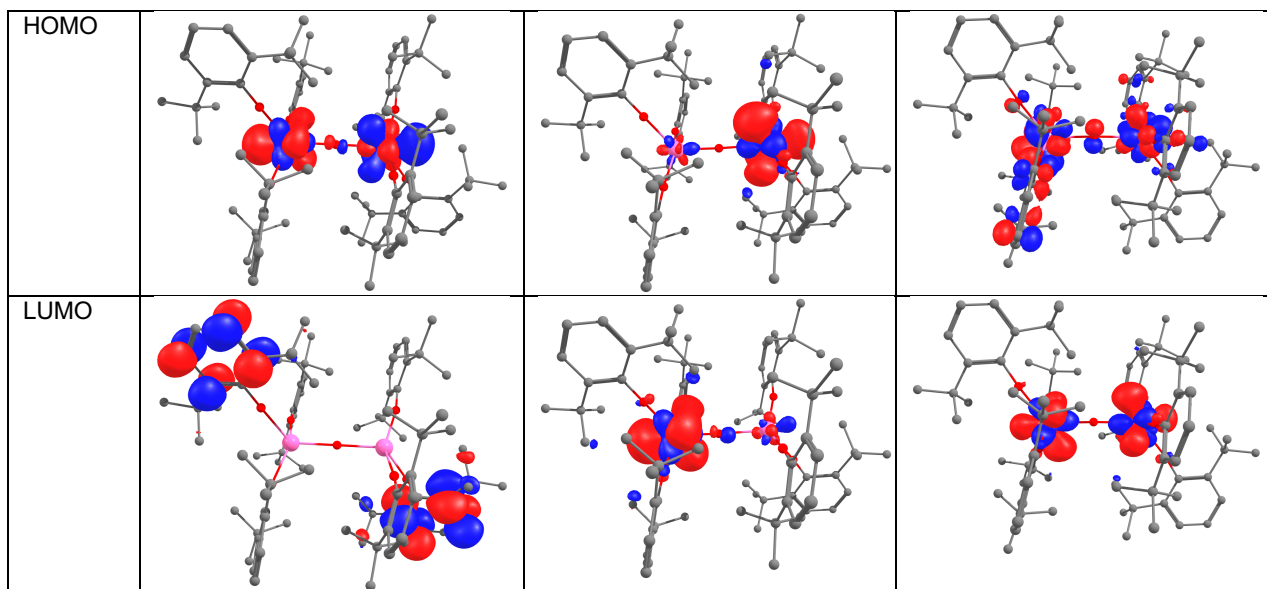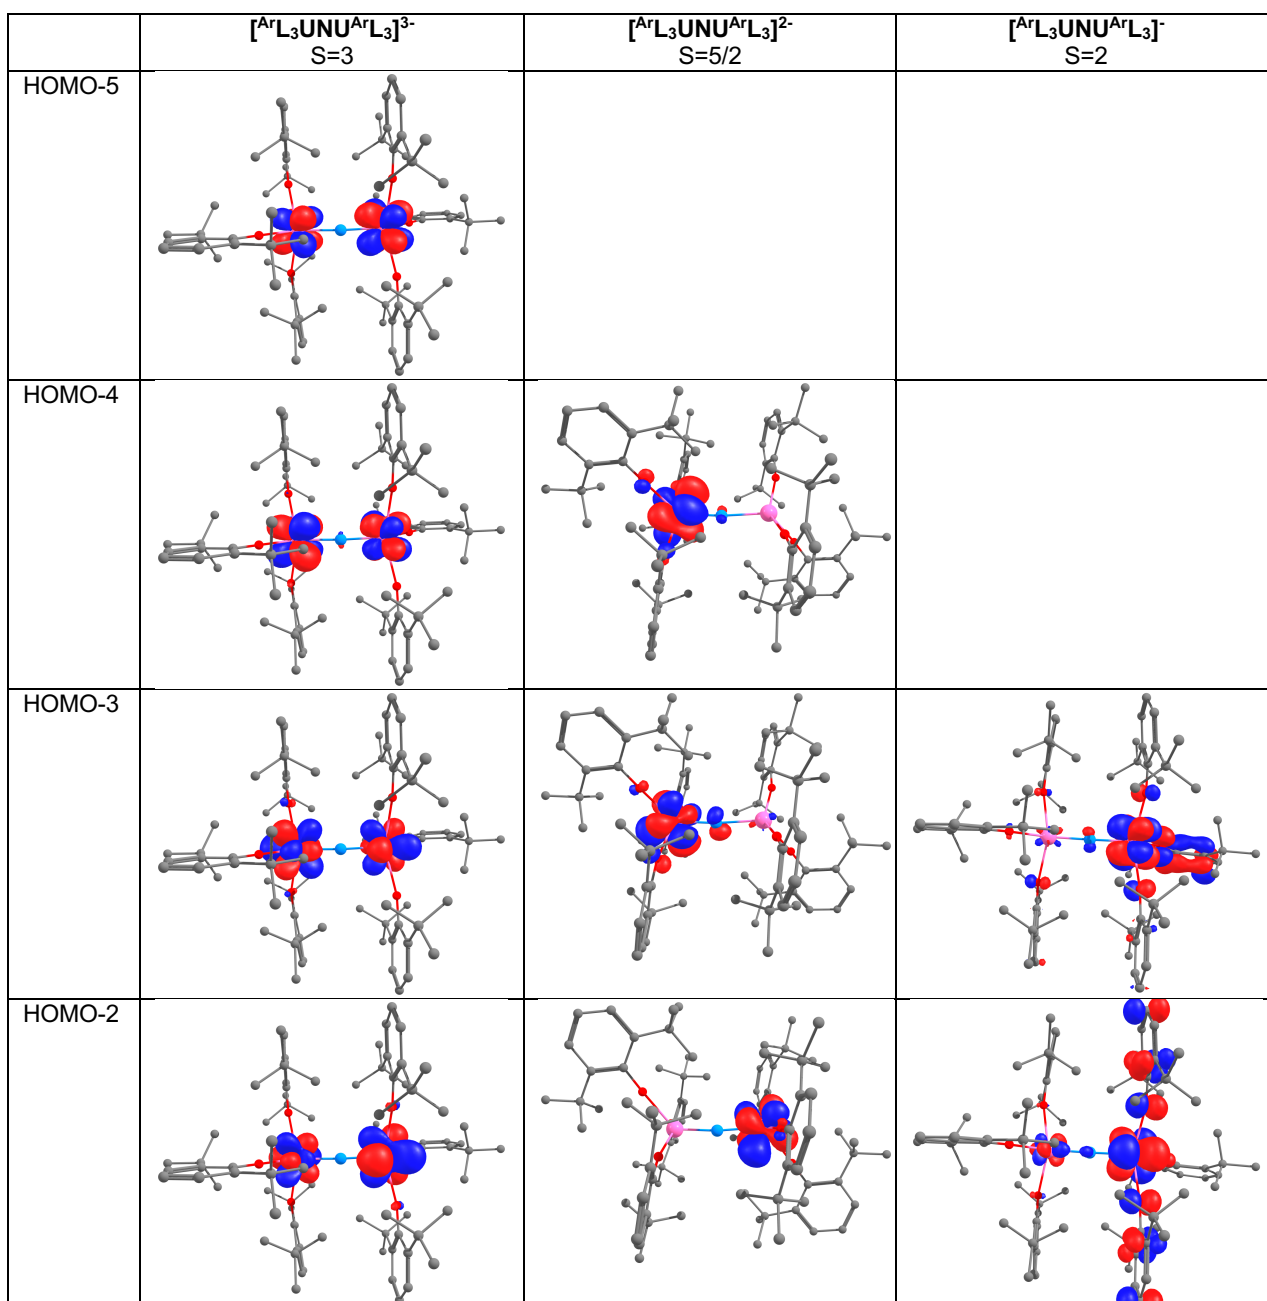

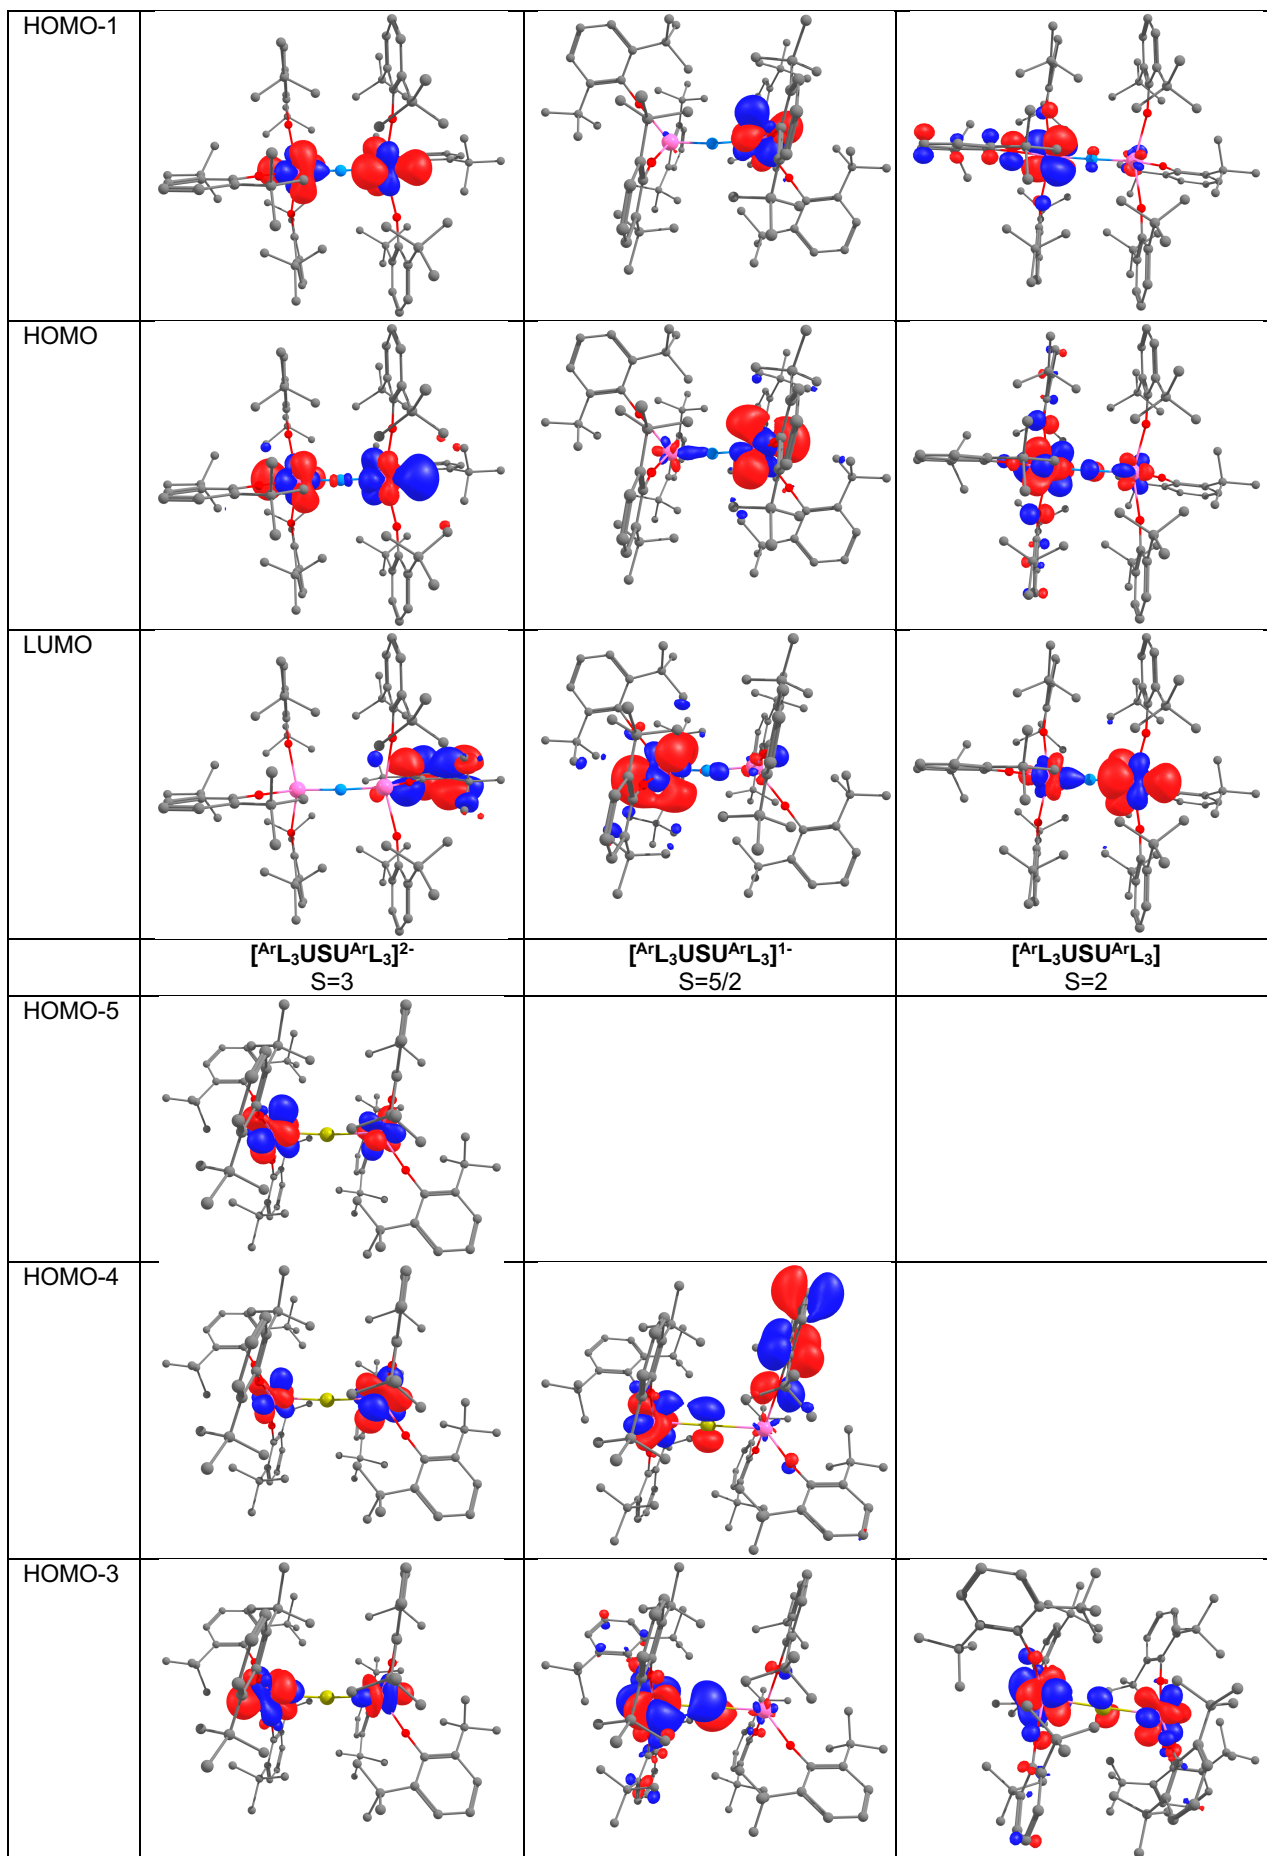

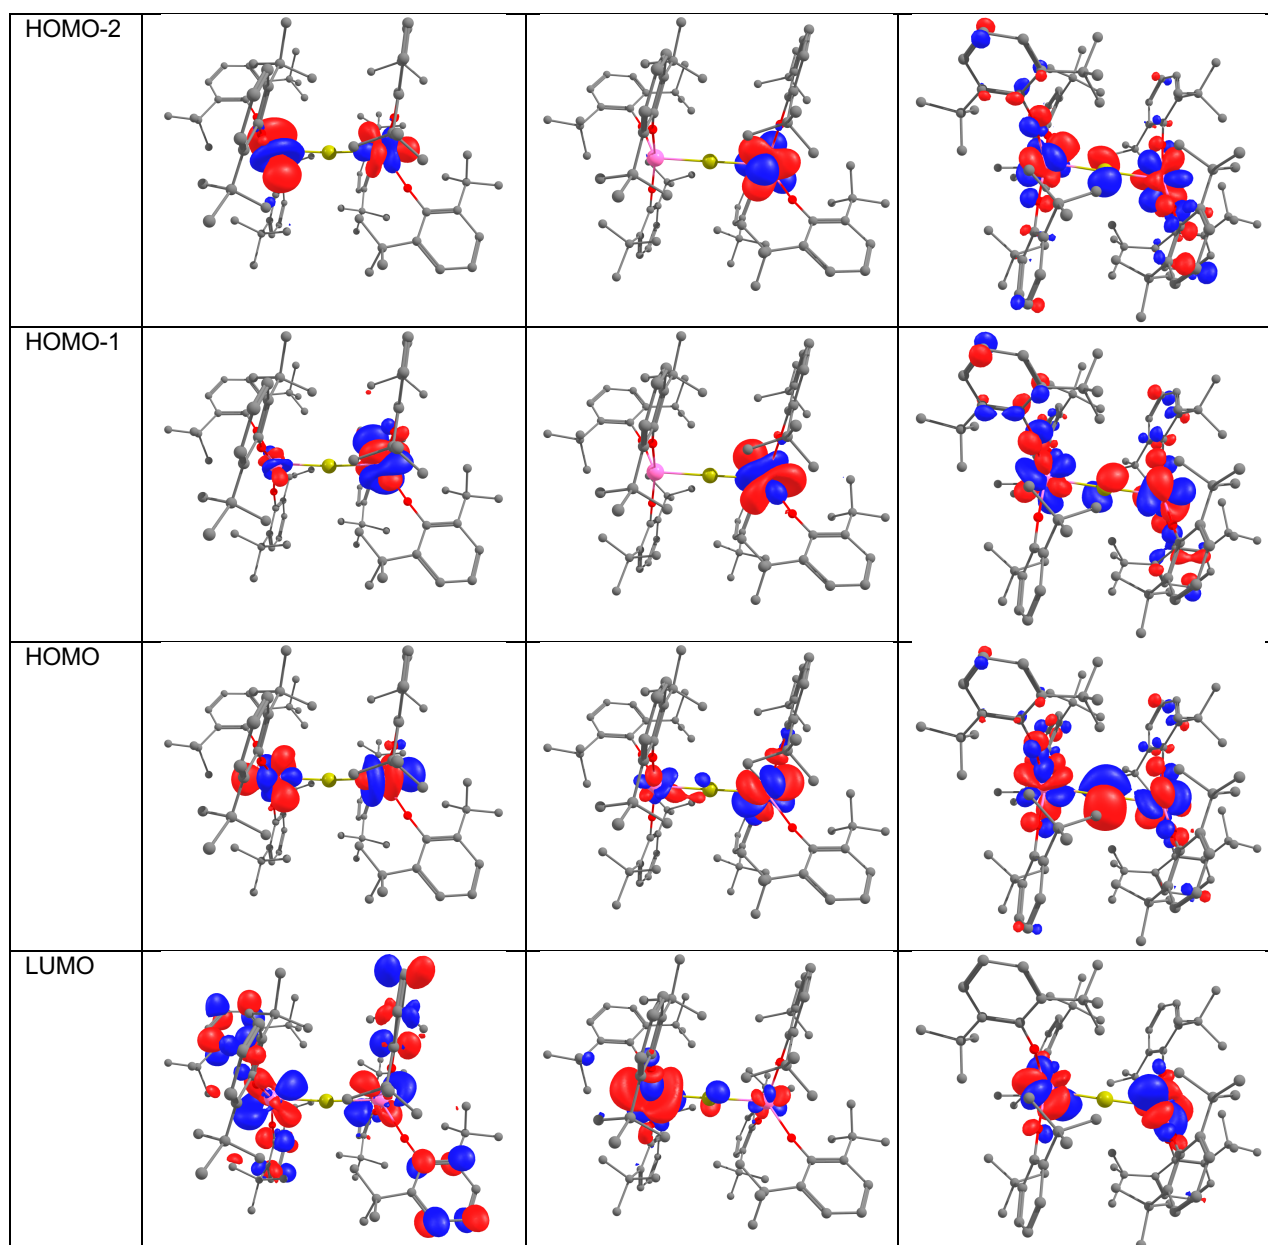

### Optimized geometries

$[\text{SiL}_3\text{UOUsiL}_3]^{2-}$  E = -5700.29774208

|    |              |              |              |
|----|--------------|--------------|--------------|
| U  | 11.841498000 | 17.740456000 | 7.846554000  |
| Si | 9.479854000  | 19.233628000 | 10.436058000 |
| Si | 12.663006000 | 14.202536000 | 8.998977000  |
| Si | 10.865591000 | 17.782077000 | 4.208511000  |
| O  | 13.588270000 | 18.808035000 | 8.358215000  |
| O  | 10.299081000 | 18.602958000 | 9.194932000  |
| O  | 9.655857000  | 20.895431000 | 10.596594000 |
| O  | 9.858162000  | 18.635365000 | 11.951999000 |
| O  | 7.869141000  | 18.830458000 | 10.199608000 |
| O  | 12.314749000 | 15.608587000 | 8.293768000  |
| O  | 14.088179000 | 14.138246000 | 9.879270000  |
| O  | 11.485526000 | 13.710538000 | 10.094956000 |
| O  | 12.847942000 | 13.060851000 | 7.789322000  |
| O  | 11.411533000 | 18.117129000 | 5.686330000  |
| O  | 11.754091000 | 16.656931000 | 3.337642000  |
| O  | 10.931891000 | 19.185953000 | 3.297874000  |
| O  | 9.299567000  | 17.163300000 | 4.205616000  |

|   |              |              |              |
|---|--------------|--------------|--------------|
| C | 9.860874000  | 21.838528000 | 9.535838000  |
| C | 8.999975000  | 21.479760000 | 8.326802000  |
| H | 9.315008000  | 20.518531000 | 7.913563000  |
| H | 9.089578000  | 22.240224000 | 7.545376000  |
| H | 7.947120000  | 21.404036000 | 8.616632000  |
| C | 11.341284000 | 21.859412000 | 9.172734000  |
| H | 11.555998000 | 22.567934000 | 8.370378000  |
| H | 11.675710000 | 20.870641000 | 8.846281000  |
| H | 11.938117000 | 22.143018000 | 10.043698000 |
| C | 9.435758000  | 23.192525000 | 10.099508000 |
| H | 8.377665000  | 23.177572000 | 10.382997000 |
| H | 9.584855000  | 23.986116000 | 9.360114000  |
| H | 10.024407000 | 23.436890000 | 10.989793000 |
| C | 11.020679000 | 18.944791000 | 12.736309000 |
| C | 12.233234000 | 19.238714000 | 11.858667000 |
| H | 12.419611000 | 18.426567000 | 11.155248000 |
| H | 13.130239000 | 19.370223000 | 12.469497000 |
| H | 12.079969000 | 20.150295000 | 11.278179000 |
| C | 10.703772000 | 20.156648000 | 13.610383000 |
| H | 10.468053000 | 21.014007000 | 12.974685000 |
| H | 11.558730000 | 20.411251000 | 14.246825000 |
| H | 9.842861000  | 19.950900000 | 14.256040000 |
| C | 11.265077000 | 17.711395000 | 13.601056000 |
| H | 10.385937000 | 17.500364000 | 14.219470000 |
| H | 12.124321000 | 17.860329000 | 14.262220000 |
| H | 11.462298000 | 16.838454000 | 12.973970000 |
| C | 6.795622000  | 18.902701000 | 11.138375000 |
| C | 5.521312000  | 18.988312000 | 10.300700000 |
| H | 5.523595000  | 19.898803000 | 9.692506000  |
| H | 4.628682000  | 18.998495000 | 10.935431000 |
| H | 5.455557000  | 18.129215000 | 9.625062000  |
| C | 6.913877000  | 20.129902000 | 12.041875000 |
| H | 7.822013000  | 20.072351000 | 12.646633000 |
| H | 6.051026000  | 20.191503000 | 12.714290000 |
| H | 6.958724000  | 21.046160000 | 11.447179000 |
| C | 6.796584000  | 17.625138000 | 11.978183000 |
| H | 6.680309000  | 16.748636000 | 11.332676000 |
| H | 5.975987000  | 17.629170000 | 12.704766000 |
| H | 7.745687000  | 17.538307000 | 12.512892000 |
| C | 14.348686000 | 14.808053000 | 11.123755000 |
| C | 15.857656000 | 15.014290000 | 11.193294000 |
| H | 16.386683000 | 14.065203000 | 11.055780000 |
| H | 16.144557000 | 15.436933000 | 12.160863000 |
| H | 16.173899000 | 15.711835000 | 10.414937000 |
| C | 13.654973000 | 16.163056000 | 11.179078000 |
| H | 13.955007000 | 16.788534000 | 10.333927000 |
| H | 13.924883000 | 16.688275000 | 12.098680000 |
| H | 12.568073000 | 16.047218000 | 11.151207000 |
| C | 13.871453000 | 13.909142000 | 12.262351000 |
| H | 12.799603000 | 13.722237000 | 12.161261000 |
| H | 14.062181000 | 14.376932000 | 13.234432000 |
| H | 14.396196000 | 12.947758000 | 12.235536000 |
| C | 10.071800000 | 13.907420000 | 9.977452000  |
| C | 9.615675000  | 13.829864000 | 8.520588000  |
| H | 9.885543000  | 12.864002000 | 8.082663000  |
| H | 10.091295000 | 14.618125000 | 7.931668000  |
| H | 8.529492000  | 13.951467000 | 8.452900000  |
| C | 9.430847000  | 12.782874000 | 10.788204000 |
| H | 9.787499000  | 12.809837000 | 11.823102000 |
| H | 9.689412000  | 11.807279000 | 10.363529000 |
| H | 8.339670000  | 12.877983000 | 10.797367000 |
| C | 9.711353000  | 15.261821000 | 10.580317000 |
| H | 10.182808000 | 16.078865000 | 10.029617000 |

|    |              |              |              |
|----|--------------|--------------|--------------|
| H  | 10.042639000 | 15.317234000 | 11.621451000 |
| H  | 8.629382000  | 15.425096000 | 10.558721000 |
| C  | 13.418687000 | 11.755194000 | 7.875677000  |
| C  | 14.939825000 | 11.876854000 | 7.787256000  |
| H  | 15.416849000 | 10.890140000 | 7.795087000  |
| H  | 15.311152000 | 12.459035000 | 8.633614000  |
| H  | 15.221708000 | 12.389559000 | 6.863049000  |
| C  | 12.877360000 | 10.990260000 | 6.669512000  |
| H  | 13.158559000 | 11.498764000 | 5.741798000  |
| H  | 11.784672000 | 10.935631000 | 6.711475000  |
| H  | 13.274444000 | 9.969883000  | 6.637660000  |
| C  | 13.014714000 | 11.049884000 | 9.169793000  |
| H  | 13.431931000 | 10.037256000 | 9.198455000  |
| H  | 11.926575000 | 10.979107000 | 9.248534000  |
| H  | 13.383227000 | 11.601132000 | 10.038605000 |
| C  | 11.819398000 | 15.242154000 | 3.577984000  |
| C  | 11.733382000 | 14.928824000 | 5.066701000  |
| H  | 10.773142000 | 15.257259000 | 5.474099000  |
| H  | 12.528980000 | 15.427476000 | 5.623344000  |
| H  | 11.825922000 | 13.855313000 | 5.251330000  |
| C  | 10.674280000 | 14.572436000 | 2.820385000  |
| H  | 9.717900000  | 14.956665000 | 3.183907000  |
| H  | 10.696963000 | 13.485641000 | 2.958618000  |
| H  | 10.749009000 | 14.783590000 | 1.748024000  |
| C  | 13.167020000 | 14.785964000 | 3.026861000  |
| H  | 13.983329000 | 15.249508000 | 3.586511000  |
| H  | 13.264839000 | 15.067213000 | 1.972998000  |
| H  | 13.271086000 | 13.698466000 | 3.105216000  |
| C  | 10.835490000 | 19.330047000 | 1.879728000  |
| C  | 12.226244000 | 19.122683000 | 1.283352000  |
| H  | 12.218058000 | 19.260490000 | 0.196227000  |
| H  | 12.577108000 | 18.113545000 | 1.512940000  |
| H  | 12.926302000 | 19.841554000 | 1.718570000  |
| C  | 9.839563000  | 18.341646000 | 1.274501000  |
| H  | 9.752442000  | 18.504812000 | 0.194724000  |
| H  | 8.851545000  | 18.463906000 | 1.726028000  |
| H  | 10.167979000 | 17.313587000 | 1.444744000  |
| C  | 10.361011000 | 20.761225000 | 1.638558000  |
| H  | 9.377235000  | 20.918868000 | 2.092474000  |
| H  | 10.286894000 | 20.976753000 | 0.567235000  |
| H  | 11.060815000 | 21.474270000 | 2.084845000  |
| C  | 8.208142000  | 17.574797000 | 5.036282000  |
| C  | 6.942873000  | 17.264677000 | 4.238950000  |
| H  | 6.928938000  | 17.839962000 | 3.307494000  |
| H  | 6.044890000  | 17.514763000 | 4.813809000  |
| H  | 6.905007000  | 16.200475000 | 3.983893000  |
| C  | 8.276784000  | 19.067279000 | 5.356222000  |
| H  | 9.208479000  | 19.304231000 | 5.875715000  |
| H  | 7.441041000  | 19.360315000 | 5.999770000  |
| H  | 8.235107000  | 19.661687000 | 4.438592000  |
| C  | 8.232218000  | 16.750136000 | 6.321707000  |
| H  | 8.236101000  | 15.681389000 | 6.086478000  |
| H  | 7.361901000  | 16.967647000 | 6.949645000  |
| H  | 9.127326000  | 16.980560000 | 6.907357000  |
| U  | 15.420560000 | 19.792194000 | 8.612623000  |
| Si | 17.701214000 | 18.223446000 | 5.963613000  |
| Si | 14.578393000 | 23.245167000 | 7.295720000  |
| Si | 16.477592000 | 19.910304000 | 12.237619000 |
| O  | 16.853854000 | 18.914138000 | 7.150182000  |
| O  | 17.648455000 | 16.542939000 | 5.969322000  |
| O  | 17.254690000 | 18.686261000 | 4.421963000  |
| O  | 19.284034000 | 18.757230000 | 6.109523000  |
| O  | 15.028293000 | 21.896978000 | 8.056867000  |

|   |              |              |              |
|---|--------------|--------------|--------------|
| O | 13.093852000 | 23.202464000 | 6.523587000  |
| O | 15.660357000 | 23.714506000 | 6.098144000  |
| O | 14.432781000 | 24.451728000 | 8.449320000  |
| O | 15.877280000 | 19.526393000 | 10.793259000 |
| O | 15.950776000 | 21.342736000 | 12.929502000 |
| O | 16.022007000 | 18.713634000 | 13.320417000 |
| O | 18.150020000 | 20.089699000 | 12.232835000 |
| C | 17.358274000 | 15.695642000 | 7.092432000  |
| C | 18.118753000 | 16.160309000 | 8.332232000  |
| H | 17.773295000 | 17.150208000 | 8.639491000  |
| H | 17.960224000 | 15.464193000 | 9.160104000  |
| H | 19.192113000 | 16.214562000 | 8.131951000  |
| C | 15.855565000 | 15.692480000 | 7.356469000  |
| H | 15.595342000 | 15.048451000 | 8.199237000  |
| H | 15.503305000 | 16.702613000 | 7.582392000  |
| H | 15.312968000 | 15.329843000 | 6.478227000  |
| C | 17.829225000 | 14.303980000 | 6.679517000  |
| H | 18.907620000 | 14.304798000 | 6.486879000  |
| H | 17.617605000 | 13.572427000 | 7.465678000  |
| H | 17.318700000 | 13.986550000 | 5.764567000  |
| C | 16.147172000 | 18.214998000 | 3.645333000  |
| C | 14.913030000 | 17.976988000 | 4.510635000  |
| H | 14.670533000 | 18.870064000 | 5.086322000  |
| H | 14.043891000 | 17.718549000 | 3.900046000  |
| H | 15.084788000 | 17.161393000 | 5.216645000  |
| C | 16.560484000 | 16.925230000 | 2.937084000  |
| H | 16.805111000 | 16.160168000 | 3.678079000  |
| H | 15.751648000 | 16.555846000 | 2.297793000  |
| H | 17.442568000 | 17.097531000 | 2.311029000  |
| C | 15.874674000 | 19.314724000 | 2.623385000  |
| H | 16.782726000 | 19.532459000 | 2.050721000  |
| H | 15.088628000 | 19.011049000 | 1.926363000  |
| H | 15.557006000 | 20.232580000 | 3.126044000  |
| C | 20.451248000 | 18.307439000 | 5.421919000  |
| C | 21.102720000 | 17.197861000 | 6.246729000  |
| H | 20.437425000 | 16.332061000 | 6.296967000  |
| H | 22.052523000 | 16.879942000 | 5.802122000  |
| H | 21.298081000 | 17.545190000 | 7.266257000  |
| C | 20.137494000 | 17.790600000 | 4.018059000  |
| H | 19.628300000 | 18.555890000 | 3.428563000  |
| H | 21.063694000 | 17.503129000 | 3.507882000  |
| H | 19.486357000 | 16.913763000 | 4.069181000  |
| C | 21.375834000 | 19.521192000 | 5.340176000  |
| H | 21.570600000 | 19.915679000 | 6.342695000  |
| H | 22.333941000 | 19.260286000 | 4.877754000  |
| H | 20.910017000 | 20.314408000 | 4.746812000  |
| C | 12.762136000 | 22.450499000 | 5.344384000  |
| C | 11.266802000 | 22.169428000 | 5.425705000  |
| H | 10.701309000 | 23.103443000 | 5.513922000  |
| H | 10.927699000 | 21.626184000 | 4.539288000  |
| H | 11.053714000 | 21.547045000 | 6.297556000  |
| C | 13.517027000 | 21.128641000 | 5.288108000  |
| H | 13.328040000 | 20.541443000 | 6.190128000  |
| H | 13.170486000 | 20.542013000 | 4.433528000  |
| H | 14.594723000 | 21.289985000 | 5.196059000  |
| C | 13.090791000 | 23.308044000 | 4.124320000  |
| H | 14.157177000 | 23.547088000 | 4.118751000  |
| H | 12.840243000 | 22.779672000 | 3.197839000  |
| H | 12.523655000 | 24.245210000 | 4.149812000  |
| C | 17.075815000 | 23.496796000 | 6.068139000  |
| C | 17.693850000 | 23.616537000 | 7.460877000  |
| H | 17.466380000 | 24.591840000 | 7.902646000  |
| H | 17.304092000 | 22.836302000 | 8.119569000  |

|   |              |              |              |
|---|--------------|--------------|--------------|
| H | 18.782434000 | 23.509196000 | 7.404590000  |
| C | 17.636351000 | 24.584128000 | 5.153538000  |
| H | 17.171757000 | 24.526478000 | 4.163700000  |
| H | 17.432885000 | 25.576933000 | 5.568572000  |
| H | 18.719517000 | 24.475537000 | 5.032820000  |
| C | 17.348053000 | 22.115301000 | 5.480243000  |
| H | 16.932830000 | 21.329091000 | 6.114184000  |
| H | 16.898569000 | 22.028920000 | 4.486354000  |
| H | 18.423424000 | 21.934215000 | 5.383823000  |
| C | 13.803346000 | 25.727060000 | 8.321559000  |
| C | 12.298870000 | 25.557643000 | 8.532690000  |
| H | 11.785321000 | 26.525319000 | 8.498553000  |
| H | 11.890032000 | 24.910493000 | 7.753523000  |
| H | 12.102811000 | 25.096383000 | 9.505242000  |
| C | 14.402111000 | 26.593417000 | 9.427468000  |
| H | 14.215709000 | 26.141662000 | 10.406929000 |
| H | 15.484922000 | 26.686104000 | 9.294699000  |
| H | 13.965496000 | 27.597967000 | 9.423022000  |
| C | 14.077875000 | 26.353727000 | 6.955050000  |
| H | 13.614005000 | 27.344045000 | 6.889576000  |
| H | 15.152570000 | 26.461027000 | 6.785524000  |
| H | 13.668724000 | 25.726068000 | 6.159223000  |
| C | 15.611486000 | 22.559150000 | 12.251932000 |
| C | 14.219241000 | 22.409297000 | 11.643869000 |
| H | 14.210462000 | 21.591689000 | 10.919670000 |
| H | 13.485088000 | 22.184212000 | 12.424009000 |
| H | 13.919997000 | 23.321477000 | 11.120331000 |
| C | 16.640562000 | 22.897968000 | 11.175441000 |
| H | 16.678192000 | 22.111701000 | 10.416415000 |
| H | 16.367161000 | 23.826466000 | 10.666289000 |
| H | 17.636922000 | 23.006543000 | 11.613954000 |
| C | 15.608206000 | 23.640859000 | 13.329167000 |
| H | 14.890748000 | 23.392548000 | 14.118389000 |
| H | 16.600324000 | 23.731743000 | 13.783993000 |
| H | 15.331762000 | 24.611997000 | 12.905471000 |
| C | 16.029458000 | 18.757316000 | 14.747229000 |
| C | 14.779560000 | 19.495201000 | 15.227900000 |
| H | 14.723226000 | 19.507372000 | 16.322160000 |
| H | 14.791912000 | 20.522692000 | 14.857511000 |
| H | 13.883570000 | 19.000162000 | 14.842399000 |
| C | 17.288466000 | 19.442767000 | 15.278039000 |
| H | 17.297275000 | 19.431296000 | 16.373568000 |
| H | 18.186449000 | 18.932517000 | 14.918638000 |
| H | 17.328657000 | 20.482736000 | 14.942841000 |
| C | 15.990751000 | 17.300195000 | 15.203687000 |
| H | 16.875364000 | 16.763988000 | 14.845206000 |
| H | 15.962365000 | 17.228358000 | 16.296337000 |
| H | 15.102869000 | 16.801527000 | 14.802438000 |
| C | 19.084553000 | 19.272393000 | 11.522981000 |
| C | 20.413023000 | 19.426469000 | 12.261042000 |
| H | 20.320236000 | 19.071548000 | 13.292731000 |
| H | 21.205663000 | 18.853498000 | 11.767966000 |
| H | 20.713381000 | 20.479114000 | 12.287560000 |
| C | 18.650716000 | 17.807520000 | 11.524209000 |
| H | 17.680834000 | 17.697372000 | 11.033300000 |
| H | 19.380210000 | 17.189098000 | 10.991445000 |
| H | 18.561767000 | 17.436016000 | 12.549114000 |
| C | 19.217244000 | 19.792554000 | 10.092388000 |
| H | 19.482555000 | 20.854659000 | 10.097392000 |
| H | 19.989411000 | 19.245094000 | 9.541920000  |
| H | 18.276121000 | 19.679002000 | 9.547422000  |



[<sup>Si</sup>L<sub>3</sub>UOU<sup>Si</sup>L<sub>3</sub>]<sup>1-</sup> E = -5700.25035695

|    |              |              |              |
|----|--------------|--------------|--------------|
| U  | 11.807121000 | 17.460628000 | 7.775487000  |
| Si | 9.507686000  | 19.183216000 | 10.210655000 |
| Si | 12.724480000 | 14.154576000 | 9.375691000  |
| Si | 10.814701000 | 17.727481000 | 4.326302000  |
| O  | 13.444722000 | 18.520900000 | 8.157611000  |
| O  | 10.422875000 | 18.398391000 | 9.103726000  |
| O  | 9.708358000  | 20.835483000 | 10.151030000 |
| O  | 9.818608000  | 18.741890000 | 11.783460000 |
| O  | 7.942965000  | 18.717004000 | 9.879963000  |
| O  | 12.354759000 | 15.604921000 | 8.727909000  |
| O  | 14.225960000 | 14.072964000 | 10.085827000 |
| O  | 11.628947000 | 13.715172000 | 10.558628000 |
| O  | 12.732746000 | 13.073706000 | 8.108073000  |
| O  | 11.309266000 | 18.228735000 | 5.797423000  |
| O  | 11.849351000 | 16.645042000 | 3.583544000  |
| O  | 10.754023000 | 19.072419000 | 3.352654000  |
| O  | 9.354466000  | 16.913207000 | 4.418839000  |
| C  | 9.990078000  | 21.656932000 | 9.004688000  |
| C  | 9.268811000  | 21.127585000 | 7.768865000  |
| H  | 9.653702000  | 20.145132000 | 7.488111000  |
| H  | 9.414966000  | 21.801010000 | 6.919435000  |
| H  | 8.195135000  | 21.037716000 | 7.958755000  |
| C  | 11.498523000 | 21.685578000 | 8.793237000  |
| H  | 11.779051000 | 22.333516000 | 7.959966000  |
| H  | 11.877221000 | 20.680829000 | 8.589079000  |
| H  | 11.996998000 | 22.056499000 | 9.692591000  |
| C  | 9.473286000  | 23.046906000 | 9.361911000  |
| H  | 8.390220000  | 23.025332000 | 9.521797000  |
| H  | 9.692783000  | 23.759831000 | 8.561239000  |
| H  | 9.948827000  | 23.402898000 | 10.281008000 |
| C  | 10.955356000 | 19.132583000 | 12.579218000 |
| C  | 12.223426000 | 19.197427000 | 11.733830000 |
| H  | 12.385431000 | 18.253043000 | 11.212560000 |
| H  | 13.097699000 | 19.389271000 | 12.360791000 |
| H  | 12.162849000 | 19.992446000 | 10.987248000 |
| C  | 10.658499000 | 20.487299000 | 13.216865000 |
| H  | 10.495043000 | 21.237738000 | 12.440318000 |
| H  | 11.493289000 | 20.804930000 | 13.850502000 |
| H  | 9.759431000  | 20.427659000 | 13.839754000 |
| C  | 11.089826000 | 18.059029000 | 13.653375000 |
| H  | 10.138086000 | 17.923580000 | 14.177129000 |
| H  | 11.849030000 | 18.344143000 | 14.387038000 |
| H  | 11.382702000 | 17.103491000 | 13.210183000 |
| C  | 6.778570000  | 18.921981000 | 10.691698000 |
| C  | 5.594641000  | 18.884134000 | 9.729648000  |
| H  | 5.670788000  | 19.691849000 | 8.994685000  |
| H  | 4.648332000  | 18.995764000 | 10.269033000 |
| H  | 5.572846000  | 17.931705000 | 9.190499000  |
| C  | 6.829276000  | 20.267351000 | 11.413056000 |
| H  | 7.669439000  | 20.301786000 | 12.111887000 |
| H  | 5.906155000  | 20.427154000 | 11.980049000 |
| H  | 6.946022000  | 21.086207000 | 10.698372000 |
| C  | 6.689434000  | 17.777295000 | 11.699089000 |
| H  | 6.627873000  | 16.817652000 | 11.175897000 |
| H  | 5.801912000  | 17.879750000 | 12.333122000 |
| H  | 7.579402000  | 17.772117000 | 12.333233000 |
| C  | 14.660020000 | 14.779784000 | 11.265953000 |
| C  | 16.157359000 | 15.004371000 | 11.094752000 |
| H  | 16.667781000 | 14.057119000 | 10.892994000 |
| H  | 16.584233000 | 15.443539000 | 12.000907000 |
| H  | 16.345540000 | 15.689552000 | 10.264813000 |

|   |              |              |              |
|---|--------------|--------------|--------------|
| C | 13.955312000 | 16.124203000 | 11.399522000 |
| H | 14.097295000 | 16.719519000 | 10.494239000 |
| H | 14.369647000 | 16.693321000 | 12.235741000 |
| H | 12.882366000 | 15.988293000 | 11.561462000 |
| C | 14.370082000 | 13.891992000 | 12.472759000 |
| H | 13.296883000 | 13.693326000 | 12.538600000 |
| H | 14.696817000 | 14.375392000 | 13.399552000 |
| H | 14.896144000 | 12.935851000 | 12.380210000 |
| C | 10.210443000 | 13.943948000 | 10.544491000 |
| C | 9.637922000  | 13.850286000 | 9.130490000  |
| H | 9.853546000  | 12.874835000 | 8.685355000  |
| H | 10.068981000 | 14.622567000 | 8.488168000  |
| H | 8.552665000  | 13.990956000 | 9.152831000  |
| C | 9.609473000  | 12.849955000 | 11.422128000 |
| H | 10.046610000 | 12.885299000 | 12.425042000 |
| H | 9.809451000  | 11.861462000 | 10.996206000 |
| H | 8.525497000  | 12.974691000 | 11.513141000 |
| C | 9.937329000  | 15.318576000 | 11.144824000 |
| H | 10.411094000 | 16.106531000 | 10.557361000 |
| H | 10.328659000 | 15.368484000 | 12.164543000 |
| H | 8.863870000  | 15.526092000 | 11.182924000 |
| C | 13.220730000 | 11.725906000 | 8.091842000  |
| C | 14.718729000 | 11.761329000 | 7.799506000  |
| H | 15.126770000 | 10.748000000 | 7.717080000  |
| H | 15.242177000 | 12.288488000 | 8.600810000  |
| H | 14.904703000 | 12.286501000 | 6.858217000  |
| C | 12.470327000 | 11.031722000 | 6.958595000  |
| H | 12.654184000 | 11.543889000 | 6.008557000  |
| H | 11.392727000 | 11.043295000 | 7.151088000  |
| H | 12.792935000 | 9.990584000  | 6.855438000  |
| C | 12.948777000 | 11.018034000 | 9.417123000  |
| H | 13.299200000 | 9.981608000  | 9.370430000  |
| H | 11.878996000 | 11.013126000 | 9.642393000  |
| H | 13.469355000 | 11.519419000 | 10.237754000 |
| C | 12.063900000 | 15.269426000 | 3.940125000  |
| C | 12.038936000 | 15.094411000 | 5.455416000  |
| H | 11.049281000 | 15.350990000 | 5.851259000  |
| H | 12.819305000 | 15.718725000 | 5.905272000  |
| H | 12.251544000 | 14.068588000 | 5.761547000  |
| C | 10.984236000 | 14.415359000 | 3.281880000  |
| H | 9.997007000  | 14.721797000 | 3.635109000  |
| H | 11.134151000 | 13.355474000 | 3.513236000  |
| H | 11.018251000 | 14.537944000 | 2.194422000  |
| C | 13.443736000 | 14.903884000 | 3.404236000  |
| H | 14.213972000 | 15.514420000 | 3.881259000  |
| H | 13.489796000 | 15.071704000 | 2.323852000  |
| H | 13.667256000 | 13.850297000 | 3.600821000  |
| C | 10.655143000 | 19.119913000 | 1.921171000  |
| C | 12.057379000 | 18.962087000 | 1.338713000  |
| H | 12.038217000 | 19.029626000 | 0.245663000  |
| H | 12.474973000 | 17.994599000 | 1.627081000  |
| H | 12.711278000 | 19.751352000 | 1.721536000  |
| C | 9.723633000  | 18.030757000 | 1.393989000  |
| H | 9.629800000  | 18.107491000 | 0.305674000  |
| H | 8.727634000  | 18.126750000 | 1.835160000  |
| H | 10.111690000 | 17.037701000 | 1.635646000  |
| C | 10.092294000 | 20.500034000 | 1.596192000  |
| H | 9.100649000  | 20.624804000 | 2.042601000  |
| H | 10.005640000 | 20.642256000 | 0.514121000  |
| H | 10.747415000 | 21.280941000 | 1.994482000  |
| C | 8.184612000  | 17.293151000 | 5.157512000  |
| C | 7.020539000  | 16.587380000 | 4.467876000  |
| H | 6.955092000  | 16.900254000 | 3.421279000  |

|    |              |              |              |
|----|--------------|--------------|--------------|
| H  | 6.072689000  | 16.823378000 | 4.961975000  |
| H  | 7.162081000  | 15.502021000 | 4.493082000  |
| C  | 7.985681000  | 18.805710000 | 5.129632000  |
| H  | 8.852655000  | 19.315883000 | 5.556715000  |
| H  | 7.104499000  | 19.086747000 | 5.715251000  |
| H  | 7.849581000  | 19.160170000 | 4.104079000  |
| C  | 8.315873000  | 16.795163000 | 6.596168000  |
| H  | 8.616655000  | 15.743056000 | 6.607152000  |
| H  | 7.364749000  | 16.884100000 | 7.129090000  |
| H  | 9.038674000  | 17.391743000 | 7.161906000  |
| U  | 15.263027000 | 19.695412000 | 8.502223000  |
| Si | 17.607848000 | 18.058625000 | 6.121106000  |
| Si | 14.666027000 | 23.231349000 | 7.205007000  |
| Si | 16.319267000 | 19.971456000 | 12.123788000 |
| O  | 16.855444000 | 18.591589000 | 7.456541000  |
| O  | 17.328008000 | 16.433318000 | 5.814806000  |
| O  | 17.179234000 | 18.830896000 | 4.703593000  |
| O  | 19.233353000 | 18.372214000 | 6.344149000  |
| O  | 14.910294000 | 21.732139000 | 7.773135000  |
| O  | 13.278056000 | 23.462548000 | 6.301350000  |
| O  | 15.920974000 | 23.734930000 | 6.213936000  |
| O  | 14.494282000 | 24.251995000 | 8.516091000  |
| O  | 15.669304000 | 19.741160000 | 10.657795000 |
| O  | 15.682396000 | 21.270623000 | 12.965158000 |
| O  | 16.002442000 | 18.619871000 | 13.054737000 |
| O  | 17.968237000 | 20.263981000 | 12.072216000 |
| C  | 17.157470000 | 15.406184000 | 6.802438000  |
| C  | 18.153786000 | 15.589214000 | 7.945068000  |
| H  | 17.957437000 | 16.524067000 | 8.476178000  |
| H  | 18.077977000 | 14.764229000 | 8.660085000  |
| H  | 19.177013000 | 15.618800000 | 7.558631000  |
| C  | 15.722840000 | 15.449827000 | 7.318946000  |
| H  | 15.550744000 | 14.712878000 | 8.105419000  |
| H  | 15.500689000 | 16.439542000 | 7.726040000  |
| H  | 15.019860000 | 15.248395000 | 6.504595000  |
| C  | 17.424800000 | 14.090750000 | 6.077357000  |
| H  | 18.451529000 | 14.063765000 | 5.697589000  |
| H  | 17.281385000 | 13.239236000 | 6.749787000  |
| H  | 16.743414000 | 13.979397000 | 5.227634000  |
| C  | 16.006041000 | 18.591122000 | 3.908893000  |
| C  | 14.807391000 | 18.217012000 | 4.776042000  |
| H  | 14.604912000 | 18.996261000 | 5.513398000  |
| H  | 13.909228000 | 18.087597000 | 4.168346000  |
| H  | 14.996017000 | 17.283150000 | 5.310393000  |
| C  | 16.318399000 | 17.473046000 | 2.917149000  |
| H  | 16.569164000 | 16.557510000 | 3.458503000  |
| H  | 15.460729000 | 17.277798000 | 2.264944000  |
| H  | 17.170692000 | 17.751272000 | 2.287852000  |
| C  | 15.735241000 | 19.900034000 | 3.175615000  |
| H  | 16.600496000 | 20.183596000 | 2.567360000  |
| H  | 14.865568000 | 19.805627000 | 2.518668000  |
| H  | 15.541451000 | 20.699583000 | 3.893557000  |
| C  | 20.292050000 | 18.284896000 | 5.385264000  |
| C  | 20.093147000 | 17.108918000 | 4.430585000  |
| H  | 19.177845000 | 17.236337000 | 3.847376000  |
| H  | 20.937600000 | 17.038496000 | 3.736510000  |
| H  | 20.016954000 | 16.168704000 | 4.983136000  |
| C  | 20.352070000 | 19.597064000 | 4.605206000  |
| H  | 20.521503000 | 20.435940000 | 5.287507000  |
| H  | 21.165730000 | 19.580839000 | 3.871456000  |
| H  | 19.406200000 | 19.759757000 | 4.082835000  |
| C  | 21.567204000 | 18.088852000 | 6.201494000  |
| H  | 21.516853000 | 17.154094000 | 6.769212000  |

|   |              |              |              |
|---|--------------|--------------|--------------|
| H | 22.449632000 | 18.053156000 | 5.553955000  |
| H | 21.692274000 | 18.912495000 | 6.911780000  |
| C | 12.859211000 | 22.818541000 | 5.088072000  |
| C | 11.435890000 | 23.311146000 | 4.846458000  |
| H | 11.419214000 | 24.400509000 | 4.736445000  |
| H | 11.015056000 | 22.862981000 | 3.941012000  |
| H | 10.794822000 | 23.040798000 | 5.690396000  |
| C | 12.875183000 | 21.305602000 | 5.261758000  |
| H | 12.234650000 | 21.001530000 | 6.091471000  |
| H | 12.514694000 | 20.795870000 | 4.364994000  |
| H | 13.888115000 | 20.962519000 | 5.479871000  |
| C | 13.768507000 | 23.240909000 | 3.936328000  |
| H | 14.802069000 | 22.952364000 | 4.137723000  |
| H | 13.444315000 | 22.771760000 | 3.001137000  |
| H | 13.743948000 | 24.327913000 | 3.805887000  |
| C | 17.316730000 | 23.462397000 | 6.405175000  |
| C | 17.694288000 | 23.513257000 | 7.884403000  |
| H | 17.445123000 | 24.487586000 | 8.313950000  |
| H | 17.155454000 | 22.743193000 | 8.440808000  |
| H | 18.767825000 | 23.340352000 | 8.010683000  |
| C | 18.055663000 | 24.553991000 | 5.635447000  |
| H | 17.750405000 | 24.549482000 | 4.584095000  |
| H | 17.827682000 | 25.539929000 | 6.053582000  |
| H | 19.139012000 | 24.400513000 | 5.681030000  |
| C | 17.636773000 | 22.091125000 | 5.817525000  |
| H | 17.059085000 | 21.309086000 | 6.313444000  |
| H | 17.396529000 | 22.064593000 | 4.751184000  |
| H | 18.697935000 | 21.852690000 | 5.934564000  |
| C | 13.956148000 | 25.577026000 | 8.542389000  |
| C | 12.434308000 | 25.479902000 | 8.641663000  |
| H | 11.978532000 | 26.474342000 | 8.705515000  |
| H | 12.039663000 | 24.963082000 | 7.763983000  |
| H | 12.151154000 | 24.914238000 | 9.534286000  |
| C | 14.528727000 | 26.233537000 | 9.796029000  |
| H | 14.257960000 | 25.655883000 | 10.685222000 |
| H | 15.620607000 | 26.283959000 | 9.737671000  |
| H | 14.142082000 | 27.250999000 | 9.916950000  |
| C | 14.363349000 | 26.372523000 | 7.302828000  |
| H | 13.975525000 | 27.395278000 | 7.362932000  |
| H | 15.452100000 | 26.419846000 | 7.213589000  |
| H | 13.964756000 | 25.903763000 | 6.399624000  |
| C | 15.350889000 | 22.546513000 | 12.390755000 |
| C | 13.985768000 | 22.437618000 | 11.717632000 |
| H | 14.024995000 | 21.697339000 | 10.916141000 |
| H | 13.226709000 | 22.126027000 | 12.440910000 |
| H | 13.687957000 | 23.395537000 | 11.282194000 |
| C | 16.407338000 | 22.987505000 | 11.381368000 |
| H | 16.462480000 | 22.276186000 | 10.554337000 |
| H | 16.147038000 | 23.961173000 | 10.959587000 |
| H | 17.392443000 | 23.048353000 | 11.851621000 |
| C | 15.295195000 | 23.520591000 | 13.562947000 |
| H | 14.559657000 | 23.184818000 | 14.301356000 |
| H | 16.271088000 | 23.584317000 | 14.055341000 |
| H | 15.011989000 | 24.522933000 | 13.225307000 |
| C | 16.122479000 | 18.488313000 | 14.475787000 |
| C | 14.813156000 | 18.956946000 | 15.106612000 |
| H | 14.836673000 | 18.852131000 | 16.196896000 |
| H | 14.633308000 | 20.004844000 | 14.853339000 |
| H | 13.983805000 | 18.358323000 | 14.720014000 |
| C | 17.300395000 | 19.292845000 | 15.022765000 |
| H | 17.393545000 | 19.136359000 | 16.102775000 |
| H | 18.234066000 | 18.985926000 | 14.544566000 |
| H | 17.157309000 | 20.361442000 | 14.840223000 |

|   |              |              |              |
|---|--------------|--------------|--------------|
| C | 16.337758000 | 17.000590000 | 14.740452000 |
| H | 17.270988000 | 16.660067000 | 14.281164000 |
| H | 16.388101000 | 16.796987000 | 15.815369000 |
| H | 15.513866000 | 16.417566000 | 14.318235000 |
| C | 18.928232000 | 19.678080000 | 11.184994000 |
| C | 20.266554000 | 19.758595000 | 11.915892000 |
| H | 20.231471000 | 19.177383000 | 12.843177000 |
| H | 21.077572000 | 19.367035000 | 11.293002000 |
| H | 20.497365000 | 20.797453000 | 12.173502000 |
| C | 18.592173000 | 18.221102000 | 10.869927000 |
| H | 17.635106000 | 18.146530000 | 10.348161000 |
| H | 19.362676000 | 17.783981000 | 10.227273000 |
| H | 18.530579000 | 17.633172000 | 11.789902000 |
| C | 18.978149000 | 20.511638000 | 9.906402000  |
| H | 19.206435000 | 21.554712000 | 10.144028000 |
| H | 19.738276000 | 20.134407000 | 9.215680000  |
| H | 18.015410000 | 20.481298000 | 9.389394000  |

[<sup>Si</sup>L<sub>3</sub>UO<sup>Si</sup>L<sub>3</sub>] E = -5700.16858310

|    |              |              |              |
|----|--------------|--------------|--------------|
| U  | 11.698017000 | 17.365310000 | 7.758159000  |
| Si | 9.489743000  | 19.100721000 | 10.238552000 |
| Si | 12.568318000 | 14.068821000 | 9.344812000  |
| Si | 10.744921000 | 17.670387000 | 4.323972000  |
| O  | 13.362319000 | 18.535941000 | 8.150746000  |
| O  | 10.362111000 | 18.318509000 | 9.079245000  |
| O  | 9.727713000  | 20.744521000 | 10.184954000 |
| O  | 9.873955000  | 18.624940000 | 11.780117000 |
| O  | 7.919053000  | 18.651653000 | 9.946202000  |
| O  | 12.292874000 | 15.571229000 | 8.733190000  |
| O  | 14.043779000 | 13.906502000 | 10.087123000 |
| O  | 11.424022000 | 13.664286000 | 10.483255000 |
| O  | 12.562029000 | 13.049088000 | 8.034561000  |
| O  | 11.211703000 | 18.155299000 | 5.824241000  |
| O  | 11.813031000 | 16.606943000 | 3.612298000  |
| O  | 10.710140000 | 19.031252000 | 3.380690000  |
| O  | 9.291508000  | 16.855545000 | 4.399553000  |
| C  | 9.938915000  | 21.580369000 | 9.033577000  |
| C  | 9.154226000  | 21.064345000 | 7.831422000  |
| H  | 9.522405000  | 20.084669000 | 7.519588000  |
| H  | 9.258549000  | 21.748375000 | 6.984318000  |
| H  | 8.091457000  | 20.973641000 | 8.073896000  |
| C  | 11.433843000 | 21.610166000 | 8.741083000  |
| H  | 11.669388000 | 22.272900000 | 7.906011000  |
| H  | 11.788503000 | 20.605494000 | 8.494557000  |
| H  | 11.979305000 | 21.963021000 | 9.620191000  |
| C  | 9.443730000  | 22.964965000 | 9.436012000  |
| H  | 8.372706000  | 22.937838000 | 9.660356000  |
| H  | 9.611400000  | 23.686400000 | 8.630692000  |
| H  | 9.972577000  | 23.312005000 | 10.328872000 |
| C  | 11.035633000 | 19.007834000 | 12.544460000 |
| C  | 12.268847000 | 19.121711000 | 11.651759000 |
| H  | 12.439199000 | 18.190370000 | 11.108916000 |
| H  | 13.159112000 | 19.330922000 | 12.250061000 |
| H  | 12.149653000 | 19.930085000 | 10.926628000 |
| C  | 10.743789000 | 20.337417000 | 13.234101000 |
| H  | 10.549960000 | 21.112736000 | 12.489304000 |
| H  | 11.592771000 | 20.642662000 | 13.854666000 |
| H  | 9.863914000  | 20.245764000 | 13.879336000 |
| C  | 11.225961000 | 17.901343000 | 13.574943000 |
| H  | 10.310688000 | 17.766618000 | 14.159936000 |
| H  | 12.040646000 | 18.150967000 | 14.260591000 |
| H  | 11.465894000 | 16.954482000 | 13.084884000 |
| C  | 6.773372000  | 18.872639000 | 10.786614000 |

|   |              |              |              |
|---|--------------|--------------|--------------|
| C | 5.569731000  | 18.854556000 | 9.849937000  |
| H | 5.642105000  | 19.662651000 | 9.115060000  |
| H | 4.638029000  | 18.979915000 | 10.410806000 |
| H | 5.521063000  | 17.903375000 | 9.310530000  |
| C | 6.863705000  | 20.215208000 | 11.507918000 |
| H | 7.722635000  | 20.238507000 | 12.184513000 |
| H | 5.959169000  | 20.384683000 | 12.100956000 |
| H | 6.968449000  | 21.034988000 | 10.792548000 |
| C | 6.691485000  | 17.728219000 | 11.793703000 |
| H | 6.603950000  | 16.769793000 | 11.272432000 |
| H | 5.819547000  | 17.844006000 | 12.446309000 |
| H | 7.593668000  | 17.708609000 | 12.410253000 |
| C | 14.467879000 | 14.546277000 | 11.308906000 |
| C | 15.987017000 | 14.622911000 | 11.228389000 |
| H | 16.410437000 | 13.630102000 | 11.045927000 |
| H | 16.403289000 | 15.011995000 | 12.161673000 |
| H | 16.291134000 | 15.288332000 | 10.416955000 |
| C | 13.878861000 | 15.947454000 | 11.417768000 |
| H | 14.163340000 | 16.550722000 | 10.552383000 |
| H | 14.248045000 | 16.452135000 | 12.314087000 |
| H | 12.787531000 | 15.905980000 | 11.467816000 |
| C | 14.023112000 | 13.677089000 | 12.480858000 |
| H | 12.934417000 | 13.581339000 | 12.483505000 |
| H | 14.343052000 | 14.115619000 | 13.432034000 |
| H | 14.458929000 | 12.675943000 | 12.399772000 |
| C | 10.010440000 | 13.926587000 | 10.446330000 |
| C | 9.472921000  | 13.912327000 | 9.016509000  |
| H | 9.667013000  | 12.951433000 | 8.531643000  |
| H | 9.942704000  | 14.697863000 | 8.417765000  |
| H | 8.393249000  | 14.090175000 | 9.018392000  |
| C | 9.362540000  | 12.809789000 | 11.258192000 |
| H | 9.773125000  | 12.791015000 | 12.272464000 |
| H | 9.550712000  | 11.836919000 | 10.793451000 |
| H | 8.280008000  | 12.957496000 | 11.326314000 |
| C | 9.760219000  | 15.278575000 | 11.101907000 |
| H | 10.261258000 | 16.080903000 | 10.558180000 |
| H | 10.134323000 | 15.276333000 | 12.129216000 |
| H | 8.691599000  | 15.508110000 | 11.128467000 |
| C | 12.984048000 | 11.675767000 | 7.977753000  |
| C | 14.490345000 | 11.647820000 | 7.733482000  |
| H | 14.847576000 | 10.618871000 | 7.619280000  |
| H | 15.014870000 | 12.110652000 | 8.573048000  |
| H | 14.734515000 | 12.200543000 | 6.821714000  |
| C | 12.236425000 | 11.067922000 | 6.795104000  |
| H | 12.485231000 | 11.597833000 | 5.869987000  |
| H | 11.155232000 | 11.136581000 | 6.950945000  |
| H | 12.501141000 | 10.013566000 | 6.666578000  |
| C | 12.632449000 | 10.935413000 | 9.265358000  |
| H | 12.939953000 | 9.887111000  | 9.192869000  |
| H | 11.555625000 | 10.967779000 | 9.451472000  |
| H | 13.143537000 | 11.382382000 | 10.122858000 |
| C | 12.018969000 | 15.221091000 | 3.938559000  |
| C | 11.975360000 | 15.014817000 | 5.449106000  |
| H | 10.981147000 | 15.262370000 | 5.840570000  |
| H | 12.757521000 | 15.621673000 | 5.920225000  |
| H | 12.178965000 | 13.982738000 | 5.737980000  |
| C | 10.946991000 | 14.383030000 | 3.249548000  |
| H | 9.954891000  | 14.678843000 | 3.597835000  |
| H | 11.096465000 | 13.318773000 | 3.458826000  |
| H | 10.993411000 | 14.529849000 | 2.165895000  |
| C | 13.404819000 | 14.867866000 | 3.410750000  |
| H | 14.169012000 | 15.477252000 | 3.899387000  |
| H | 13.458321000 | 15.046865000 | 2.332703000  |

|    |              |              |              |
|----|--------------|--------------|--------------|
| H  | 13.630745000 | 13.813282000 | 3.597808000  |
| C  | 10.653558000 | 19.100482000 | 1.943571000  |
| C  | 12.073237000 | 18.954183000 | 1.402700000  |
| H  | 12.086380000 | 19.046873000 | 0.311722000  |
| H  | 12.483073000 | 17.980041000 | 1.679748000  |
| H  | 12.715167000 | 19.734751000 | 1.822203000  |
| C  | 9.739704000  | 18.016706000 | 1.378328000  |
| H  | 9.674100000  | 18.108807000 | 0.289424000  |
| H  | 8.732219000  | 18.104776000 | 1.794353000  |
| H  | 10.123754000 | 17.020379000 | 1.613706000  |
| C  | 10.097818000 | 20.483944000 | 1.625163000  |
| H  | 9.094638000  | 20.602049000 | 2.046540000  |
| H  | 10.040279000 | 20.640662000 | 0.543405000  |
| H  | 10.742184000 | 21.259110000 | 2.050868000  |
| C  | 8.108746000  | 17.228569000 | 5.126773000  |
| C  | 6.953206000  | 16.544024000 | 4.403950000  |
| H  | 6.905637000  | 16.881293000 | 3.364216000  |
| H  | 5.999745000  | 16.775132000 | 4.888992000  |
| H  | 7.088328000  | 15.457718000 | 4.407220000  |
| C  | 7.919756000  | 18.742068000 | 5.127891000  |
| H  | 8.783683000  | 19.240457000 | 5.574783000  |
| H  | 7.034290000  | 19.015350000 | 5.710426000  |
| H  | 7.794715000  | 19.118324000 | 4.108845000  |
| C  | 8.221114000  | 16.695279000 | 6.553497000  |
| H  | 8.510197000  | 15.640632000 | 6.539596000  |
| H  | 7.266975000  | 16.782833000 | 7.081237000  |
| H  | 8.946693000  | 17.271599000 | 7.138474000  |
| U  | 15.054751000 | 19.710821000 | 8.453154000  |
| Si | 17.449962000 | 17.960006000 | 6.327230000  |
| Si | 14.494276000 | 23.190978000 | 7.102042000  |
| Si | 16.358672000 | 20.007763000 | 11.939878000 |
| O  | 16.536605000 | 18.458297000 | 7.606914000  |
| O  | 17.191976000 | 16.353925000 | 5.979258000  |
| O  | 17.095400000 | 18.797413000 | 4.936819000  |
| O  | 19.011913000 | 18.316870000 | 6.752286000  |
| O  | 14.725895000 | 21.675960000 | 7.708451000  |
| O  | 13.101654000 | 23.376060000 | 6.217775000  |
| O  | 15.749555000 | 23.609372000 | 6.090768000  |
| O  | 14.348327000 | 24.188645000 | 8.420309000  |
| O  | 15.607163000 | 19.768707000 | 10.490559000 |
| O  | 15.695147000 | 21.258533000 | 12.808764000 |
| O  | 16.131175000 | 18.618390000 | 12.819209000 |
| O  | 17.968744000 | 20.375299000 | 11.734606000 |
| C  | 17.020034000 | 15.278086000 | 6.920996000  |
| C  | 18.000573000 | 15.423973000 | 8.080067000  |
| H  | 17.791131000 | 16.332477000 | 8.650547000  |
| H  | 17.921425000 | 14.569745000 | 8.758715000  |
| H  | 19.028863000 | 15.477114000 | 7.711263000  |
| C  | 15.579991000 | 15.290473000 | 7.419873000  |
| H  | 15.399309000 | 14.494248000 | 8.143429000  |
| H  | 15.353036000 | 16.242851000 | 7.903730000  |
| H  | 14.889334000 | 15.155064000 | 6.582466000  |
| C  | 17.307668000 | 14.002237000 | 6.137894000  |
| H  | 18.335724000 | 14.007325000 | 5.761815000  |
| H  | 17.174432000 | 13.120867000 | 6.772401000  |
| H  | 16.630853000 | 13.918624000 | 5.281696000  |
| C  | 15.976174000 | 18.565684000 | 4.057232000  |
| C  | 14.731975000 | 18.160046000 | 4.841715000  |
| H  | 14.444843000 | 18.940647000 | 5.550071000  |
| H  | 13.884851000 | 18.000492000 | 4.171547000  |
| H  | 14.907254000 | 17.234067000 | 5.394509000  |
| C  | 16.362987000 | 17.474742000 | 3.063183000  |
| H  | 16.575607000 | 16.542630000 | 3.591875000  |

|   |              |              |              |
|---|--------------|--------------|--------------|
| H | 15.554302000 | 17.298919000 | 2.346431000  |
| H | 17.257435000 | 17.771645000 | 2.505910000  |
| C | 15.741620000 | 19.890548000 | 3.341947000  |
| H | 16.637643000 | 20.190115000 | 2.789258000  |
| H | 14.909575000 | 19.809483000 | 2.636491000  |
| H | 15.505943000 | 20.673822000 | 4.065439000  |
| C | 20.188907000 | 18.245704000 | 5.928800000  |
| C | 20.106630000 | 17.090503000 | 4.934308000  |
| H | 19.272424000 | 17.229640000 | 4.240797000  |
| H | 21.030025000 | 17.033788000 | 4.348926000  |
| H | 19.966224000 | 16.137974000 | 5.451847000  |
| C | 20.336057000 | 19.574220000 | 5.192448000  |
| H | 20.413150000 | 20.397228000 | 5.909155000  |
| H | 21.236604000 | 19.576891000 | 4.569240000  |
| H | 19.464962000 | 19.749026000 | 4.555800000  |
| C | 21.348817000 | 18.031177000 | 6.895253000  |
| H | 21.229524000 | 17.084865000 | 7.432122000  |
| H | 22.303227000 | 18.007068000 | 6.359549000  |
| H | 21.385701000 | 18.840964000 | 7.630453000  |
| C | 12.669658000 | 22.725657000 | 5.007186000  |
| C | 11.237413000 | 23.201578000 | 4.793031000  |
| H | 11.207030000 | 24.290523000 | 4.685613000  |
| H | 10.808336000 | 22.751242000 | 3.893028000  |
| H | 10.612791000 | 22.922020000 | 5.646384000  |
| C | 12.711204000 | 21.215309000 | 5.188624000  |
| H | 12.093177000 | 20.905603000 | 6.033024000  |
| H | 12.338012000 | 20.694816000 | 4.303715000  |
| H | 13.735423000 | 20.889080000 | 5.378370000  |
| C | 13.556276000 | 23.159535000 | 3.843520000  |
| H | 14.595583000 | 22.875896000 | 4.020999000  |
| H | 13.216541000 | 22.693450000 | 2.912828000  |
| H | 13.520966000 | 24.246443000 | 3.718412000  |
| C | 17.159966000 | 23.484558000 | 6.344137000  |
| C | 17.488044000 | 23.826267000 | 7.793601000  |
| H | 17.134530000 | 24.828906000 | 8.047181000  |
| H | 17.014576000 | 23.116477000 | 8.475299000  |
| H | 18.569257000 | 23.785485000 | 7.958180000  |
| C | 17.829232000 | 24.475864000 | 5.397939000  |
| H | 17.560908000 | 24.250575000 | 4.361011000  |
| H | 17.504631000 | 25.496633000 | 5.623020000  |
| H | 18.919017000 | 24.429875000 | 5.490688000  |
| C | 17.599305000 | 22.061497000 | 6.017915000  |
| H | 17.091274000 | 21.338025000 | 6.658693000  |
| H | 17.365890000 | 21.810682000 | 4.981295000  |
| H | 18.675609000 | 21.944055000 | 6.168600000  |
| C | 13.823755000 | 25.526723000 | 8.451412000  |
| C | 12.303257000 | 25.442706000 | 8.561486000  |
| H | 11.860759000 | 26.441961000 | 8.634541000  |
| H | 11.893088000 | 24.937117000 | 7.684389000  |
| H | 12.021743000 | 24.876511000 | 9.453986000  |
| C | 14.414206000 | 26.174192000 | 9.699726000  |
| H | 14.137231000 | 25.604475000 | 10.591870000 |
| H | 15.506163000 | 26.208019000 | 9.636098000  |
| H | 14.043262000 | 27.197362000 | 9.817557000  |
| C | 14.234222000 | 26.309780000 | 7.206565000  |
| H | 13.861776000 | 27.337713000 | 7.266883000  |
| H | 15.323044000 | 26.343130000 | 7.110301000  |
| H | 13.820819000 | 25.848655000 | 6.305583000  |
| C | 15.325352000 | 22.556237000 | 12.302490000 |
| C | 13.918716000 | 22.452993000 | 11.723377000 |
| H | 13.911290000 | 21.741773000 | 10.895157000 |
| H | 13.214192000 | 22.103260000 | 12.482785000 |
| H | 13.579303000 | 23.420447000 | 11.343648000 |



|   |              |              |              |
|---|--------------|--------------|--------------|
| C | 16.306694000 | 23.031431000 | 11.237384000 |
| H | 16.275673000 | 22.370187000 | 10.368467000 |
| H | 16.036104000 | 24.031565000 | 10.892492000 |
| H | 17.327640000 | 23.046096000 | 11.626147000 |
| C | 15.348075000 | 23.489026000 | 13.507070000 |
| H | 14.670212000 | 23.122838000 | 14.284617000 |
| H | 16.356667000 | 23.545632000 | 13.928478000 |
| H | 15.034350000 | 24.498305000 | 13.222183000 |
| C | 16.341239000 | 18.450279000 | 14.233700000 |
| C | 15.063707000 | 18.873090000 | 14.953803000 |
| H | 15.156633000 | 18.729041000 | 16.035448000 |
| H | 14.850989000 | 19.926131000 | 14.753403000 |
| H | 14.220659000 | 18.273907000 | 14.598092000 |
| C | 17.533934000 | 19.270772000 | 14.718974000 |
| H | 17.704874000 | 19.089864000 | 15.785105000 |
| H | 18.440264000 | 18.998404000 | 14.171605000 |
| H | 17.354127000 | 20.340657000 | 14.579640000 |
| C | 16.607380000 | 16.963382000 | 14.440699000 |
| H | 17.502388000 | 16.654426000 | 13.892088000 |
| H | 16.758747000 | 16.741188000 | 15.501866000 |
| H | 15.760637000 | 16.370628000 | 14.082841000 |
| C | 18.884243000 | 19.813395000 | 10.778200000 |
| C | 20.271243000 | 19.974383000 | 11.391827000 |
| H | 20.347194000 | 19.397467000 | 12.318893000 |
| H | 21.043841000 | 19.622245000 | 10.700822000 |
| H | 20.465661000 | 21.026237000 | 11.623697000 |
| C | 18.592969000 | 18.337023000 | 10.525468000 |
| H | 17.602103000 | 18.199298000 | 10.088154000 |
| H | 19.322116000 | 17.926908000 | 9.821879000  |
| H | 18.645526000 | 17.769315000 | 11.458595000 |
| C | 18.782806000 | 20.621672000 | 9.487038000  |
| H | 19.063558000 | 21.663975000 | 9.662155000  |
| H | 19.414520000 | 20.200012000 | 8.701852000  |
| H | 17.756471000 | 20.610769000 | 9.114715000  |

[<sup>Si</sup>L<sub>3</sub>UNU<sup>Si</sup>L<sub>3</sub>]<sup>3-</sup> E = -5679.78327838

|    |              |              |              |
|----|--------------|--------------|--------------|
| U  | 11.696131000 | 17.711271000 | 7.791339000  |
| Si | 9.381311000  | 19.340565000 | 10.390771000 |
| Si | 12.511973000 | 14.202257000 | 9.119296000  |
| Si | 10.892525000 | 17.550244000 | 4.081511000  |
| N  | 13.454896000 | 18.687408000 | 8.301126000  |
| O  | 10.108311000 | 18.583659000 | 9.179119000  |
| O  | 9.614114000  | 21.006289000 | 10.444116000 |
| O  | 9.777731000  | 18.849507000 | 11.947537000 |
| O  | 7.731619000  | 19.012059000 | 10.265581000 |
| O  | 12.060175000 | 15.549653000 | 8.383600000  |
| O  | 14.015980000 | 14.177796000 | 9.864016000  |
| O  | 11.445885000 | 13.728863000 | 10.342393000 |
| O  | 12.604123000 | 12.975618000 | 7.968354000  |
| O  | 11.294381000 | 18.036975000 | 5.551180000  |
| O  | 11.955452000 | 16.511436000 | 3.291592000  |
| O  | 10.823473000 | 18.896141000 | 3.073956000  |
| O  | 9.419651000  | 16.725399000 | 4.003001000  |
| C  | 9.854819000  | 21.894214000 | 9.348587000  |
| C  | 9.039107000  | 21.484425000 | 8.122908000  |
| H  | 9.389393000  | 20.525782000 | 7.731387000  |
| H  | 9.124645000  | 22.236552000 | 7.332541000  |
| H  | 7.981636000  | 21.383031000 | 8.389080000  |
| C  | 11.347088000 | 21.910999000 | 9.040655000  |
| H  | 11.591312000 | 22.604786000 | 8.233785000  |
| H  | 11.706225000 | 20.919279000 | 8.748655000  |
| H  | 11.910427000 | 22.217038000 | 9.926665000  |
| C  | 9.401749000  | 23.270999000 | 9.834245000  |

|   |              |              |              |
|---|--------------|--------------|--------------|
| H | 8.328875000  | 23.269074000 | 10.057521000 |
| H | 9.597122000  | 24.037137000 | 9.076518000  |
| H | 9.938830000  | 23.545806000 | 10.748020000 |
| C | 10.995010000 | 19.159846000 | 12.641569000 |
| C | 12.178500000 | 19.247495000 | 11.683233000 |
| H | 12.236991000 | 18.344363000 | 11.077126000 |
| H | 13.121325000 | 19.356524000 | 12.225108000 |
| H | 12.081603000 | 20.091857000 | 10.998160000 |
| C | 10.804098000 | 20.479814000 | 13.387531000 |
| H | 10.587107000 | 21.274337000 | 12.669515000 |
| H | 11.706172000 | 20.741761000 | 13.951688000 |
| H | 9.968319000  | 20.407619000 | 14.093723000 |
| C | 11.201840000 | 18.015094000 | 13.629118000 |
| H | 10.321772000 | 17.901137000 | 14.272047000 |
| H | 12.074482000 | 18.197785000 | 14.262853000 |
| H | 11.361284000 | 17.076797000 | 13.092183000 |
| C | 6.711724000  | 19.213610000 | 11.237893000 |
| C | 5.400391000  | 19.275474000 | 10.455233000 |
| H | 5.414786000  | 20.116686000 | 9.754144000  |
| H | 4.541310000  | 19.397275000 | 11.124441000 |
| H | 5.261899000  | 18.356341000 | 9.876514000  |
| C | 6.913909000  | 20.512809000 | 12.018873000 |
| H | 7.853297000  | 20.478593000 | 12.575356000 |
| H | 6.091573000  | 20.664896000 | 12.727262000 |
| H | 6.953588000  | 21.369814000 | 11.341541000 |
| C | 6.701866000  | 18.020574000 | 12.196123000 |
| H | 6.543222000  | 17.091952000 | 11.638088000 |
| H | 5.904709000  | 18.113703000 | 12.943175000 |
| H | 7.666100000  | 17.955737000 | 12.706111000 |
| C | 14.405569000 | 14.914077000 | 11.033663000 |
| C | 15.877706000 | 15.270138000 | 10.855847000 |
| H | 16.474986000 | 14.371789000 | 10.662446000 |
| H | 16.266030000 | 15.760871000 | 11.752654000 |
| H | 15.991305000 | 15.960543000 | 10.016695000 |
| C | 13.604354000 | 16.198223000 | 11.185481000 |
| H | 13.716522000 | 16.830809000 | 10.297766000 |
| H | 13.959714000 | 16.764027000 | 12.051287000 |
| H | 12.542737000 | 15.977505000 | 11.323449000 |
| C | 14.201239000 | 14.000894000 | 12.241123000 |
| H | 13.145632000 | 13.725667000 | 12.317350000 |
| H | 14.505053000 | 14.499181000 | 13.168381000 |
| H | 14.792655000 | 13.084292000 | 12.134161000 |
| C | 10.035473000 | 13.973055000 | 10.360777000 |
| C | 9.416236000  | 13.788395000 | 8.974892000  |
| H | 9.618344000  | 12.783280000 | 8.590687000  |
| H | 9.832669000  | 14.520958000 | 8.278095000  |
| H | 8.330843000  | 13.930796000 | 9.018992000  |
| C | 9.457742000  | 12.944752000 | 11.332129000 |
| H | 9.924444000  | 13.048352000 | 12.317486000 |
| H | 9.646778000  | 11.928081000 | 10.970764000 |
| H | 8.376131000  | 13.075151000 | 11.447575000 |
| C | 9.776851000  | 15.388914000 | 10.872093000 |
| H | 10.211097000 | 16.131955000 | 10.199768000 |
| H | 10.216640000 | 15.517448000 | 11.865367000 |
| H | 8.703352000  | 15.591942000 | 10.948833000 |
| C | 13.243159000 | 11.707625000 | 8.066139000  |
| C | 14.740904000 | 11.882924000 | 7.810056000  |
| H | 15.258663000 | 10.916434000 | 7.812813000  |
| H | 15.171613000 | 12.522152000 | 8.583960000  |
| H | 14.903056000 | 12.360401000 | 6.839019000  |
| C | 12.618649000 | 10.844756000 | 6.970220000  |
| H | 12.763108000 | 11.312639000 | 5.990941000  |
| H | 11.542134000 | 10.735135000 | 7.137623000  |

|    |              |              |              |
|----|--------------|--------------|--------------|
| H  | 13.068542000 | 9.846018000  | 6.945782000  |
| C  | 13.011590000 | 11.064287000 | 9.433635000  |
| H  | 13.487240000 | 10.078019000 | 9.479340000  |
| H  | 11.942323000 | 10.944263000 | 9.628885000  |
| H  | 13.433266000 | 11.691716000 | 10.222555000 |
| C  | 12.233746000 | 15.150234000 | 3.644379000  |
| C  | 12.195965000 | 14.961083000 | 5.153985000  |
| H  | 11.197861000 | 15.159758000 | 5.552850000  |
| H  | 12.891049000 | 15.651350000 | 5.635869000  |
| H  | 12.472775000 | 13.945924000 | 5.449065000  |
| C  | 11.207006000 | 14.251913000 | 2.955307000  |
| H  | 10.201694000 | 14.529156000 | 3.281747000  |
| H  | 11.383617000 | 13.197343000 | 3.196012000  |
| H  | 11.262514000 | 14.369931000 | 1.866981000  |
| C  | 13.638465000 | 14.858460000 | 3.123644000  |
| H  | 14.369277000 | 15.487030000 | 3.637923000  |
| H  | 13.701817000 | 15.059867000 | 2.048693000  |
| H  | 13.907461000 | 13.810268000 | 3.294855000  |
| C  | 10.831245000 | 18.942868000 | 1.650890000  |
| C  | 12.279253000 | 18.859600000 | 1.166111000  |
| H  | 12.340389000 | 18.927978000 | 0.073636000  |
| H  | 12.718647000 | 17.913944000 | 1.491163000  |
| H  | 12.861451000 | 19.680067000 | 1.596352000  |
| C  | 10.000930000 | 17.813526000 | 1.040126000  |
| H  | 9.983482000  | 17.898850000 | -0.052485000 |
| H  | 8.972486000  | 17.849155000 | 1.409248000  |
| H  | 10.425337000 | 16.843337000 | 1.309552000  |
| C  | 10.229271000 | 20.296540000 | 1.275915000  |
| H  | 9.198978000  | 20.371584000 | 1.638960000  |
| H  | 10.225062000 | 20.441756000 | 0.189892000  |
| H  | 10.809336000 | 21.106207000 | 1.730411000  |
| C  | 8.233238000  | 17.003720000 | 4.750031000  |
| C  | 7.069000000  | 16.610984000 | 3.840693000  |
| H  | 7.063954000  | 17.229259000 | 2.936495000  |
| H  | 6.108389000  | 16.740009000 | 4.351568000  |
| H  | 7.159644000  | 15.562717000 | 3.536601000  |
| C  | 8.128318000  | 18.482198000 | 5.125103000  |
| H  | 8.965464000  | 18.770830000 | 5.766771000  |
| H  | 7.194392000  | 18.676498000 | 5.663273000  |
| H  | 8.150783000  | 19.109336000 | 4.228544000  |
| C  | 8.239289000  | 16.138384000 | 6.008163000  |
| H  | 8.335868000  | 15.079796000 | 5.744643000  |
| H  | 7.318684000  | 16.270732000 | 6.587656000  |
| H  | 9.084959000  | 16.413683000 | 6.651536000  |
| U  | 15.246253000 | 19.671853000 | 8.646569000  |
| Si | 17.585291000 | 18.199979000 | 5.961963000  |
| Si | 14.611059000 | 23.267862000 | 7.501318000  |
| Si | 16.360394000 | 19.735034000 | 12.269383000 |
| O  | 16.764120000 | 18.810338000 | 7.195484000  |
| O  | 17.352718000 | 16.549296000 | 5.716166000  |
| O  | 17.286828000 | 18.872542000 | 4.452947000  |
| O  | 19.221684000 | 18.498305000 | 6.236824000  |
| O  | 14.872896000 | 21.852404000 | 8.199182000  |
| O  | 13.193471000 | 23.443768000 | 6.614188000  |
| O  | 15.809884000 | 23.718832000 | 6.402286000  |
| O  | 14.491250000 | 24.437442000 | 8.704703000  |
| O  | 15.683922000 | 19.363612000 | 10.868156000 |
| O  | 15.796763000 | 21.119284000 | 13.044107000 |
| O  | 16.051717000 | 18.488292000 | 13.359545000 |
| O  | 18.027293000 | 19.992708000 | 12.217041000 |
| C  | 17.106998000 | 15.584745000 | 6.747415000  |
| C  | 17.983219000 | 15.873111000 | 7.964495000  |
| H  | 17.696515000 | 16.829647000 | 8.408056000  |

|   |              |              |             |
|---|--------------|--------------|-------------|
| H | 17.870760000 | 15.090729000 | 8.720613000 |
| H | 19.036934000 | 15.924077000 | 7.672553000 |
| C | 15.628203000 | 15.604571000 | 7.119340000 |
| H | 15.399162000 | 14.885242000 | 7.908736000 |
| H | 15.314564000 | 16.594175000 | 7.471611000 |
| H | 15.017739000 | 15.354172000 | 6.246454000 |
| C | 17.481182000 | 14.233574000 | 6.141056000 |
| H | 18.539828000 | 14.216341000 | 5.858101000 |
| H | 17.298369000 | 13.421870000 | 6.852789000 |
| H | 16.884308000 | 14.043409000 | 5.242739000 |
| C | 16.138046000 | 18.614158000 | 3.632607000 |
| C | 14.902423000 | 18.297991000 | 4.469189000 |
| H | 14.688574000 | 19.090388000 | 5.187918000 |
| H | 14.024361000 | 18.160742000 | 3.833592000 |
| H | 15.046579000 | 17.376532000 | 5.036422000 |
| C | 16.469042000 | 17.440123000 | 2.711353000 |
| H | 16.684952000 | 16.554382000 | 3.314418000 |
| H | 15.632123000 | 17.218211000 | 2.040643000 |
| H | 17.348535000 | 17.669720000 | 2.098720000 |
| C | 15.919339000 | 19.882017000 | 2.811783000 |
| H | 16.825294000 | 20.134727000 | 2.249583000 |
| H | 15.097566000 | 19.747989000 | 2.101451000 |
| H | 15.672453000 | 20.722938000 | 3.464482000 |
| C | 20.305799000 | 18.381213000 | 5.321107000 |
| C | 21.555455000 | 18.187411000 | 6.179099000 |
| H | 21.476169000 | 17.264525000 | 6.763082000 |
| H | 22.458699000 | 18.129403000 | 5.561548000 |
| H | 21.666455000 | 19.022791000 | 6.878044000 |
| C | 20.132913000 | 17.190542000 | 4.377391000 |
| H | 19.235891000 | 17.317510000 | 3.767579000 |
| H | 20.999894000 | 17.101099000 | 3.712903000 |
| H | 20.028566000 | 16.261088000 | 4.943147000 |
| C | 20.410814000 | 19.678662000 | 4.518121000 |
| H | 20.564484000 | 20.527730000 | 5.192249000 |
| H | 21.248258000 | 19.643975000 | 3.811302000 |
| H | 19.482843000 | 19.839669000 | 3.964152000 |
| C | 12.884137000 | 22.790889000 | 5.374529000 |
| C | 11.364209000 | 22.678157000 | 5.312353000 |
| H | 10.896472000 | 23.653989000 | 5.484202000 |
| H | 11.044395000 | 22.304472000 | 4.334090000 |
| H | 11.009202000 | 21.974195000 | 6.068325000 |
| C | 13.496830000 | 21.398080000 | 5.302170000 |
| H | 13.184849000 | 20.775596000 | 6.146836000 |
| H | 13.182087000 | 20.899017000 | 4.381264000 |
| H | 14.588537000 | 21.453559000 | 5.309352000 |
| C | 13.405061000 | 23.663514000 | 4.232882000 |
| H | 14.485189000 | 23.793881000 | 4.334965000 |
| H | 13.190079000 | 23.204687000 | 3.261088000 |
| H | 12.931312000 | 24.651616000 | 4.257658000 |
| C | 17.206797000 | 23.417105000 | 6.461431000 |
| C | 17.720759000 | 23.388975000 | 7.900758000 |
| H | 17.506027000 | 24.334780000 | 8.408373000 |
| H | 17.241764000 | 22.577041000 | 8.453000000 |
| H | 18.803729000 | 23.225274000 | 7.916439000 |
| C | 17.899351000 | 24.532644000 | 5.678870000 |
| H | 17.505743000 | 24.581089000 | 4.658002000 |
| H | 17.727700000 | 25.502956000 | 6.157127000 |
| H | 18.980069000 | 24.362045000 | 5.623077000 |
| C | 17.454725000 | 22.071815000 | 5.785922000 |
| H | 16.943848000 | 21.258936000 | 6.308445000 |
| H | 17.097555000 | 22.093676000 | 4.752386000 |
| H | 18.522839000 | 21.833486000 | 5.770084000 |
| C | 13.969840000 | 25.759149000 | 8.608617000 |

|   |              |              |              |
|---|--------------|--------------|--------------|
| C | 12.445186000 | 25.699213000 | 8.718022000  |
| H | 12.006545000 | 26.703924000 | 8.711656000  |
| H | 12.040494000 | 25.127374000 | 7.879942000  |
| H | 12.154305000 | 25.200939000 | 9.647616000  |
| C | 14.555763000 | 26.523341000 | 9.795121000  |
| H | 14.275501000 | 26.037134000 | 10.734880000 |
| H | 15.648878000 | 26.542590000 | 9.733459000  |
| H | 14.192187000 | 27.556646000 | 9.819718000  |
| C | 14.381276000 | 26.434021000 | 7.299874000  |
| H | 13.996363000 | 27.459361000 | 7.259222000  |
| H | 15.470277000 | 26.466877000 | 7.208888000  |
| H | 13.985927000 | 25.877906000 | 6.446620000  |
| C | 15.509287000 | 22.376812000 | 12.417064000 |
| C | 14.113600000 | 22.311896000 | 11.803429000 |
| H | 14.080599000 | 21.525140000 | 11.047386000 |
| H | 13.366067000 | 22.087847000 | 12.570427000 |
| H | 13.856663000 | 23.255729000 | 11.313975000 |
| C | 16.537979000 | 22.719874000 | 11.341355000 |
| H | 16.511493000 | 21.976349000 | 10.539548000 |
| H | 16.303003000 | 23.688304000 | 10.890884000 |
| H | 17.546801000 | 22.746745000 | 11.762511000 |
| C | 15.556996000 | 23.412398000 | 13.538055000 |
| H | 14.839160000 | 23.157957000 | 14.325326000 |
| H | 16.556492000 | 23.447550000 | 13.985127000 |
| H | 15.312929000 | 24.410812000 | 13.159485000 |
| C | 16.175698000 | 18.504048000 | 14.778121000 |
| C | 14.906977000 | 19.114748000 | 15.374328000 |
| H | 14.949807000 | 19.135159000 | 16.469507000 |
| H | 14.780096000 | 20.133120000 | 14.999566000 |
| H | 14.034864000 | 18.526448000 | 15.075362000 |
| C | 17.405296000 | 19.290996000 | 15.232305000 |
| H | 17.503640000 | 19.250519000 | 16.323102000 |
| H | 18.312688000 | 18.878572000 | 14.783338000 |
| H | 17.321647000 | 20.337614000 | 14.928054000 |
| C | 16.306856000 | 17.041247000 | 15.199277000 |
| H | 17.210936000 | 16.599101000 | 14.767767000 |
| H | 16.359962000 | 16.944331000 | 16.289414000 |
| H | 15.444307000 | 16.468933000 | 14.843311000 |
| C | 18.976678000 | 19.374633000 | 11.347765000 |
| C | 20.311847000 | 19.426632000 | 12.090389000 |
| H | 20.256821000 | 18.849664000 | 13.019989000 |
| H | 21.120782000 | 19.015012000 | 11.476833000 |
| H | 20.564476000 | 20.461077000 | 12.347056000 |
| C | 18.602195000 | 17.923807000 | 11.047158000 |
| H | 17.638740000 | 17.882193000 | 10.534293000 |
| H | 19.356455000 | 17.453505000 | 10.407833000 |
| H | 18.524199000 | 17.348809000 | 11.975075000 |
| C | 19.060878000 | 20.185688000 | 10.055945000 |
| H | 19.334827000 | 21.222668000 | 10.276858000 |
| H | 19.805190000 | 19.766790000 | 9.370636000  |
| H | 18.091015000 | 20.190558000 | 9.541936000  |

$[\text{SiL}_3\text{UNUSiL}_3]^{2-}$  E = -5679.77853291

|    |              |              |              |
|----|--------------|--------------|--------------|
| U  | 11.882915000 | 17.692643000 | 7.767753000  |
| Si | 9.644113000  | 19.146537000 | 10.432374000 |
| Si | 12.304201000 | 14.016880000 | 8.767713000  |
| Si | 10.733254000 | 17.743910000 | 4.178705000  |
| N  | 13.521680000 | 18.604154000 | 8.323188000  |
| O  | 10.347873000 | 18.568823000 | 9.095558000  |
| O  | 9.871389000  | 20.792765000 | 10.654230000 |
| O  | 10.127526000 | 18.452305000 | 11.871676000 |
| O  | 8.017037000  | 18.769808000 | 10.282461000 |
| O  | 12.065311000 | 15.516961000 | 8.222895000  |

|   |              |              |              |
|---|--------------|--------------|--------------|
| O | 13.685276000 | 13.756188000 | 9.679179000  |
| O | 11.037217000 | 13.468168000 | 9.724245000  |
| O | 12.483899000 | 13.011006000 | 7.442593000  |
| O | 11.293042000 | 18.102307000 | 5.649881000  |
| O | 11.409285000 | 16.398037000 | 3.448849000  |
| O | 11.080813000 | 19.026967000 | 3.162226000  |
| O | 9.080556000  | 17.438945000 | 4.174842000  |
| C | 10.023788000 | 21.780957000 | 9.623533000  |
| C | 9.076900000  | 21.495963000 | 8.458944000  |
| H | 9.334438000  | 20.547718000 | 7.981443000  |
| H | 9.137738000  | 22.289858000 | 7.708439000  |
| H | 8.042661000  | 21.435673000 | 8.812766000  |
| C | 11.476349000 | 21.795498000 | 9.159899000  |
| H | 11.641572000 | 22.518693000 | 8.358785000  |
| H | 11.778374000 | 20.811281000 | 8.790298000  |
| H | 12.139413000 | 22.053780000 | 9.991760000  |
| C | 9.662114000  | 23.112170000 | 10.276765000 |
| H | 8.623466000  | 23.101380000 | 10.624592000 |
| H | 9.782226000  | 23.938178000 | 9.568583000  |
| H | 10.310447000 | 23.299225000 | 11.138867000 |
| C | 11.318217000 | 18.738786000 | 12.624148000 |
| C | 12.490814000 | 19.101277000 | 11.717750000 |
| H | 12.714034000 | 18.305062000 | 11.005577000 |
| H | 13.392696000 | 19.289990000 | 12.305905000 |
| H | 12.271324000 | 20.004267000 | 11.144042000 |
| C | 11.003992000 | 19.886386000 | 13.581445000 |
| H | 10.730887000 | 20.777395000 | 13.010366000 |
| H | 11.867951000 | 20.119180000 | 14.212433000 |
| H | 10.164619000 | 19.618366000 | 14.232909000 |
| C | 11.624728000 | 17.461754000 | 13.399155000 |
| H | 10.772755000 | 17.180084000 | 14.027397000 |
| H | 12.499685000 | 17.598760000 | 14.041561000 |
| H | 11.829997000 | 16.640612000 | 12.707973000 |
| C | 6.983113000  | 18.908865000 | 11.257998000 |
| C | 5.680422000  | 18.985464000 | 10.464661000 |
| H | 5.686574000  | 19.858988000 | 9.804543000  |
| H | 4.813787000  | 19.060270000 | 11.130314000 |
| H | 5.563946000  | 18.091625000 | 9.843154000  |
| C | 7.162425000  | 20.173873000 | 12.096083000 |
| H | 8.093095000  | 20.129640000 | 12.667316000 |
| H | 6.329480000  | 20.283555000 | 12.799225000 |
| H | 7.199939000  | 21.060887000 | 11.458684000 |
| C | 6.984936000  | 17.676057000 | 12.162395000 |
| H | 6.812764000  | 16.770282000 | 11.572249000 |
| H | 6.197328000  | 17.743957000 | 12.921458000 |
| H | 7.953512000  | 17.585294000 | 12.660095000 |
| C | 14.072101000 | 14.366955000 | 10.919415000 |
| C | 15.500713000 | 13.893080000 | 11.168265000 |
| H | 15.531978000 | 12.801747000 | 11.257253000 |
| H | 15.904525000 | 14.329853000 | 12.087081000 |
| H | 16.146722000 | 14.186899000 | 10.337278000 |
| C | 14.020557000 | 15.886291000 | 10.802498000 |
| H | 14.635085000 | 16.243834000 | 9.973383000  |
| H | 14.376241000 | 16.362268000 | 11.720744000 |
| H | 12.995933000 | 16.218882000 | 10.620123000 |
| C | 13.160511000 | 13.883849000 | 12.045856000 |
| H | 12.129432000 | 14.194761000 | 11.868725000 |
| H | 13.493468000 | 14.290631000 | 13.006819000 |
| H | 13.175863000 | 12.790637000 | 12.108461000 |
| C | 9.701685000  | 13.982080000 | 9.792185000  |
| C | 9.118622000  | 14.180388000 | 8.394310000  |
| H | 9.175375000  | 13.251200000 | 7.818501000  |
| H | 9.673626000  | 14.954205000 | 7.861622000  |

|    |              |              |              |
|----|--------------|--------------|--------------|
| H  | 8.069323000  | 14.487871000 | 8.454740000  |
| C  | 8.900911000  | 12.926786000 | 10.551168000 |
| H  | 9.349351000  | 12.745955000 | 11.533439000 |
| H  | 8.892063000  | 11.980727000 | 9.999475000  |
| H  | 7.865677000  | 13.252174000 | 10.698891000 |
| C  | 9.702111000  | 15.300175000 | 10.560623000 |
| H  | 10.347115000 | 16.032454000 | 10.073788000 |
| H  | 10.059047000 | 15.152466000 | 11.584057000 |
| H  | 8.698170000  | 15.729559000 | 10.610731000 |
| C  | 13.082807000 | 11.716396000 | 7.368686000  |
| C  | 14.600178000 | 11.881160000 | 7.275244000  |
| H  | 15.096127000 | 10.909787000 | 7.167828000  |
| H  | 14.974107000 | 12.373787000 | 8.175436000  |
| H  | 14.858860000 | 12.498411000 | 6.409687000  |
| C  | 12.536812000 | 11.085654000 | 6.089758000  |
| H  | 12.782103000 | 11.710272000 | 5.224876000  |
| H  | 11.447457000 | 10.991067000 | 6.145645000  |
| H  | 12.963163000 | 10.090011000 | 5.927255000  |
| C  | 12.707042000 | 10.862470000 | 8.578891000  |
| H  | 13.136613000 | 9.858635000  | 8.489478000  |
| H  | 11.620428000 | 10.769303000 | 8.661339000  |
| H  | 13.083660000 | 11.320859000 | 9.496768000  |
| C  | 11.645280000 | 15.116993000 | 4.055686000  |
| C  | 12.999177000 | 15.143028000 | 4.757629000  |
| H  | 13.010068000 | 15.910298000 | 5.533204000  |
| H  | 13.798956000 | 15.363841000 | 4.045260000  |
| H  | 13.196927000 | 14.187904000 | 5.249594000  |
| C  | 10.545410000 | 14.753286000 | 5.048414000  |
| H  | 10.502373000 | 15.487146000 | 5.855758000  |
| H  | 10.762374000 | 13.785838000 | 5.507502000  |
| H  | 9.569218000  | 14.721965000 | 4.557688000  |
| C  | 11.666121000 | 14.115886000 | 2.904517000  |
| H  | 12.436050000 | 14.389931000 | 2.175820000  |
| H  | 10.698441000 | 14.099739000 | 2.392298000  |
| H  | 11.880964000 | 13.106262000 | 3.270030000  |
| C  | 11.086436000 | 19.042435000 | 1.732779000  |
| C  | 12.436150000 | 18.512471000 | 1.251109000  |
| H  | 12.503632000 | 18.533300000 | 0.157611000  |
| H  | 12.576372000 | 17.485852000 | 1.597970000  |
| H  | 13.241403000 | 19.129384000 | 1.659412000  |
| C  | 9.943707000  | 18.206827000 | 1.157356000  |
| H  | 9.950056000  | 18.257340000 | 0.062976000  |
| H  | 8.977350000  | 18.572361000 | 1.515731000  |
| H  | 10.046450000 | 17.160214000 | 1.455964000  |
| C  | 10.921641000 | 20.506667000 | 1.333691000  |
| H  | 9.967931000  | 20.899759000 | 1.700159000  |
| H  | 10.947982000 | 20.623344000 | 0.244905000  |
| H  | 11.729024000 | 21.107118000 | 1.763893000  |
| C  | 8.095523000  | 18.087601000 | 4.987152000  |
| C  | 6.771781000  | 17.899092000 | 4.250055000  |
| H  | 6.815401000  | 18.374694000 | 3.264791000  |
| H  | 5.941591000  | 18.339822000 | 4.811924000  |
| H  | 6.566166000  | 16.833244000 | 4.105686000  |
| C  | 8.405364000  | 19.573884000 | 5.153492000  |
| H  | 9.369385000  | 19.701420000 | 5.650932000  |
| H  | 7.636661000  | 20.063079000 | 5.760540000  |
| H  | 8.447792000  | 20.069957000 | 4.179499000  |
| C  | 8.038705000  | 17.403314000 | 6.352572000  |
| H  | 7.892664000  | 16.325893000 | 6.232381000  |
| H  | 7.216701000  | 17.800641000 | 6.957007000  |
| H  | 8.962958000  | 17.572288000 | 6.910051000  |
| U  | 15.311271000 | 19.768865000 | 8.588913000  |
| Si | 17.763274000 | 18.132920000 | 6.165820000  |

|    |              |              |              |
|----|--------------|--------------|--------------|
| Si | 14.518302000 | 23.216668000 | 7.123564000  |
| Si | 16.560393000 | 19.888107000 | 12.109776000 |
| O  | 16.830023000 | 18.921523000 | 7.214547000  |
| O  | 17.710392000 | 16.457633000 | 6.295730000  |
| O  | 17.440957000 | 18.480862000 | 4.560421000  |
| O  | 19.335689000 | 18.670780000 | 6.380707000  |
| O  | 14.938414000 | 21.841749000 | 7.843168000  |
| O  | 13.014237000 | 23.241406000 | 6.387010000  |
| O  | 15.592943000 | 23.674373000 | 5.910641000  |
| O  | 14.443368000 | 24.410751000 | 8.299786000  |
| O  | 16.133299000 | 19.367615000 | 10.649686000 |
| O  | 15.474110000 | 20.900997000 | 12.892773000 |
| O  | 16.690358000 | 18.547667000 | 13.108222000 |
| O  | 18.005852000 | 20.754678000 | 12.106191000 |
| C  | 17.270018000 | 15.662454000 | 7.407699000  |
| C  | 17.767609000 | 16.247173000 | 8.728107000  |
| H  | 17.309908000 | 17.220672000 | 8.913450000  |
| H  | 17.516273000 | 15.588968000 | 9.564437000  |
| H  | 18.854030000 | 16.373815000 | 8.706807000  |
| C  | 15.747727000 | 15.577557000 | 7.388735000  |
| H  | 15.371149000 | 14.921625000 | 8.177215000  |
| H  | 15.302983000 | 16.566491000 | 7.534758000  |
| H  | 15.404380000 | 15.182156000 | 6.428182000  |
| C  | 17.872366000 | 14.277561000 | 7.182611000  |
| H  | 18.966774000 | 14.321839000 | 7.199424000  |
| H  | 17.542849000 | 13.579700000 | 7.959215000  |
| H  | 17.561680000 | 13.881636000 | 6.210288000  |
| C  | 16.288807000 | 18.085032000 | 3.808906000  |
| C  | 15.026074000 | 18.117647000 | 4.664878000  |
| H  | 14.925076000 | 19.084544000 | 5.158041000  |
| H  | 14.138361000 | 17.942791000 | 4.051834000  |
| H  | 15.056112000 | 17.352235000 | 5.442228000  |
| C  | 16.527117000 | 16.681620000 | 3.252289000  |
| H  | 16.666009000 | 15.976768000 | 4.075312000  |
| H  | 15.679043000 | 16.354226000 | 2.640787000  |
| H  | 17.427923000 | 16.664439000 | 2.628677000  |
| C  | 16.175089000 | 19.094399000 | 2.669523000  |
| H  | 17.123813000 | 19.162409000 | 2.126534000  |
| H  | 15.392552000 | 18.798789000 | 1.964372000  |
| H  | 15.929405000 | 20.086263000 | 3.060693000  |
| C  | 20.548944000 | 18.122181000 | 5.868099000  |
| C  | 21.094299000 | 17.121304000 | 6.885978000  |
| H  | 20.404322000 | 16.279417000 | 6.985220000  |
| H  | 22.072469000 | 16.734656000 | 6.578440000  |
| H  | 21.202764000 | 17.597076000 | 7.865653000  |
| C  | 20.348610000 | 17.434442000 | 4.517485000  |
| H  | 19.926504000 | 18.130127000 | 3.788776000  |
| H  | 21.306892000 | 17.061686000 | 4.138739000  |
| H  | 19.663945000 | 16.587766000 | 4.618921000  |
| C  | 21.503665000 | 19.305640000 | 5.719045000  |
| H  | 21.627147000 | 19.814651000 | 6.680612000  |
| H  | 22.489549000 | 18.981268000 | 5.368533000  |
| H  | 21.100093000 | 20.027574000 | 5.001644000  |
| C  | 12.623443000 | 22.514926000 | 5.211128000  |
| C  | 11.146947000 | 22.177096000 | 5.386051000  |
| H  | 10.556585000 | 23.084823000 | 5.551725000  |
| H  | 10.764084000 | 21.661035000 | 4.500976000  |
| H  | 11.018365000 | 21.515261000 | 6.245698000  |
| C  | 13.413939000 | 21.222100000 | 5.051045000  |
| H  | 13.320290000 | 20.604017000 | 5.948236000  |
| H  | 13.023217000 | 20.644853000 | 4.208507000  |
| H  | 14.474109000 | 21.428681000 | 4.882585000  |
| C  | 12.838752000 | 23.429840000 | 4.007793000  |



|   |              |              |              |
|---|--------------|--------------|--------------|
| H | 13.897280000 | 23.692699000 | 3.930028000  |
| H | 12.526654000 | 22.939133000 | 3.079699000  |
| H | 12.258640000 | 24.352525000 | 4.119634000  |
| C | 17.007282000 | 23.439013000 | 5.907955000  |
| C | 17.604583000 | 23.594797000 | 7.306416000  |
| H | 17.411211000 | 24.596149000 | 7.703546000  |
| H | 17.166627000 | 22.859338000 | 7.985842000  |
| H | 18.687746000 | 23.436451000 | 7.276868000  |
| C | 17.592884000 | 24.490193000 | 4.967796000  |
| H | 17.144910000 | 24.402415000 | 3.972366000  |
| H | 17.389277000 | 25.497688000 | 5.345764000  |
| H | 18.677167000 | 24.369993000 | 4.870051000  |
| C | 17.277065000 | 22.034953000 | 5.371326000  |
| H | 16.847098000 | 21.276021000 | 6.028474000  |
| H | 16.838335000 | 21.922468000 | 4.375204000  |
| H | 18.352564000 | 21.844073000 | 5.292640000  |
| C | 13.813910000 | 25.689022000 | 8.240382000  |
| C | 12.324185000 | 25.516227000 | 8.537691000  |
| H | 11.812034000 | 26.484646000 | 8.572274000  |
| H | 11.864168000 | 24.897268000 | 7.763892000  |
| H | 12.191350000 | 25.019227000 | 9.503331000  |
| C | 14.477775000 | 26.527546000 | 9.331163000  |
| H | 14.355353000 | 26.047237000 | 10.307380000 |
| H | 15.549873000 | 26.629987000 | 9.134453000  |
| H | 14.038247000 | 27.529549000 | 9.382306000  |
| C | 14.012635000 | 26.350093000 | 6.877077000  |
| H | 13.552052000 | 27.344094000 | 6.863514000  |
| H | 15.077042000 | 26.457292000 | 6.650675000  |
| H | 13.554451000 | 25.744791000 | 6.091046000  |
| C | 15.177066000 | 22.265217000 | 12.558550000 |
| C | 15.211332000 | 22.484417000 | 11.051592000 |
| H | 16.208907000 | 22.293086000 | 10.646347000 |
| H | 14.501219000 | 21.819498000 | 10.552212000 |
| H | 14.935213000 | 23.506372000 | 10.781135000 |
| C | 16.190952000 | 23.167812000 | 13.259360000 |
| H | 17.199831000 | 22.919822000 | 12.920877000 |
| H | 15.990742000 | 24.222977000 | 13.042199000 |
| H | 16.144132000 | 23.025333000 | 14.344657000 |
| C | 13.768323000 | 22.528454000 | 13.082864000 |
| H | 13.046924000 | 21.888124000 | 12.569015000 |
| H | 13.712044000 | 22.322934000 | 14.157023000 |
| H | 13.480877000 | 23.572093000 | 12.915639000 |
| C | 16.710694000 | 18.495338000 | 14.533959000 |
| C | 15.271207000 | 18.555286000 | 15.044506000 |
| H | 15.232163000 | 18.475088000 | 16.136805000 |
| H | 14.810905000 | 19.497392000 | 14.738114000 |
| H | 14.693404000 | 17.730421000 | 14.616554000 |
| C | 17.537360000 | 19.635830000 | 15.126812000 |
| H | 17.578710000 | 19.551127000 | 16.218466000 |
| H | 18.558967000 | 19.614283000 | 14.737511000 |
| H | 17.094138000 | 20.601218000 | 14.869638000 |
| C | 17.340168000 | 17.149210000 | 14.887003000 |
| H | 18.366565000 | 17.095828000 | 14.509633000 |
| H | 17.360694000 | 16.994105000 | 15.971143000 |
| H | 16.767805000 | 16.334722000 | 14.431340000 |
| C | 19.129267000 | 20.529774000 | 11.246041000 |
| C | 20.336177000 | 21.101983000 | 11.986712000 |
| H | 20.490385000 | 20.573301000 | 12.933169000 |
| H | 21.246810000 | 21.007378000 | 11.385506000 |
| H | 20.178945000 | 22.162406000 | 12.210004000 |
| C | 19.334157000 | 19.039966000 | 10.974660000 |
| H | 18.463118000 | 18.626003000 | 10.461421000 |
| H | 20.214446000 | 18.884009000 | 10.342265000 |

|   |              |              |              |
|---|--------------|--------------|--------------|
| H | 19.477182000 | 18.493938000 | 11.912305000 |
| C | 18.907904000 | 21.285306000 | 9.937026000  |
| H | 18.745376000 | 22.349683000 | 10.134150000 |
| H | 19.769061000 | 21.183017000 | 9.268493000  |
| H | 18.029608000 | 20.891854000 | 9.415780000  |

[<sup>Si</sup>L<sub>3</sub>UNU<sup>Si</sup>L<sub>3</sub>]<sup>1-</sup> E = -5679.73720103

|    |              |              |              |
|----|--------------|--------------|--------------|
| U  | 11.933579000 | 17.679133000 | 7.840535000  |
| Si | 9.690164000  | 19.229619000 | 10.405859000 |
| Si | 12.343360000 | 14.019276000 | 8.809464000  |
| Si | 10.737139000 | 17.766383000 | 4.308084000  |
| N  | 13.658452000 | 18.693967000 | 8.207963000  |
| O  | 10.443862000 | 18.637141000 | 9.084503000  |
| O  | 9.993168000  | 20.855991000 | 10.639090000 |
| O  | 10.123879000 | 18.482520000 | 11.829669000 |
| O  | 8.069825000  | 18.916101000 | 10.175763000 |
| O  | 12.109071000 | 15.542498000 | 8.285898000  |
| O  | 13.725702000 | 13.763712000 | 9.711778000  |
| O  | 11.083294000 | 13.477521000 | 9.765346000  |
| O  | 12.521289000 | 13.060850000 | 7.457418000  |
| O  | 11.280403000 | 18.111641000 | 5.801977000  |
| O  | 11.498301000 | 16.479301000 | 3.565948000  |
| O  | 11.023641000 | 19.090819000 | 3.335141000  |
| O  | 9.107861000  | 17.381542000 | 4.301632000  |
| C  | 10.116314000 | 21.852498000 | 9.608820000  |
| C  | 9.117367000  | 21.594111000 | 8.483186000  |
| H  | 9.336878000  | 20.649064000 | 7.980895000  |
| H  | 9.163440000  | 22.395546000 | 7.739949000  |
| H  | 8.098089000  | 21.545853000 | 8.877926000  |
| C  | 11.548500000 | 21.838577000 | 9.085594000  |
| H  | 11.695762000 | 22.560673000 | 8.280652000  |
| H  | 11.806065000 | 20.848710000 | 8.699284000  |
| H  | 12.246604000 | 22.080389000 | 9.891971000  |
| C  | 9.807317000  | 23.182678000 | 10.288085000 |
| H  | 8.784992000  | 23.184380000 | 10.680310000 |
| H  | 9.908002000  | 24.011547000 | 9.580911000  |
| H  | 10.494962000 | 23.353052000 | 11.122613000 |
| C  | 11.303853000 | 18.736559000 | 12.613735000 |
| C  | 12.499948000 | 19.081035000 | 11.730482000 |
| H  | 12.732499000 | 18.265758000 | 11.043146000 |
| H  | 13.388323000 | 19.270411000 | 12.337413000 |
| H  | 12.296956000 | 19.979006000 | 11.141941000 |
| C  | 10.997918000 | 19.882202000 | 13.575040000 |
| H  | 10.754888000 | 20.786173000 | 13.011189000 |
| H  | 11.855831000 | 20.087793000 | 14.223278000 |
| H  | 10.142526000 | 19.625606000 | 14.209117000 |
| C  | 11.566025000 | 17.446987000 | 13.383310000 |
| H  | 10.696529000 | 17.184305000 | 13.994735000 |
| H  | 12.432297000 | 17.558653000 | 14.041973000 |
| H  | 11.761369000 | 16.623943000 | 12.691692000 |
| C  | 7.003227000  | 19.045973000 | 11.124254000 |
| C  | 5.741031000  | 19.262806000 | 10.294191000 |
| H  | 5.824157000  | 20.184618000 | 9.709502000  |
| H  | 4.856416000  | 19.338153000 | 10.935159000 |
| H  | 5.594741000  | 18.429432000 | 9.599750000  |
| C  | 7.224594000  | 20.230285000 | 12.062998000 |
| H  | 8.132923000  | 20.091000000 | 12.654655000 |
| H  | 6.378212000  | 20.329359000 | 12.750931000 |
| H  | 7.323780000  | 21.160910000 | 11.498336000 |
| C  | 6.906262000  | 17.746944000 | 11.921355000 |
| H  | 6.726458000  | 16.902635000 | 11.248338000 |
| H  | 6.084735000  | 17.790356000 | 12.644893000 |
| H  | 7.841411000  | 17.570888000 | 12.459016000 |

|   |              |              |              |
|---|--------------|--------------|--------------|
| C | 14.100680000 | 14.337283000 | 10.974387000 |
| C | 15.536309000 | 13.879729000 | 11.208588000 |
| H | 15.585331000 | 12.786810000 | 11.254166000 |
| H | 15.929203000 | 14.285148000 | 12.145989000 |
| H | 16.180217000 | 14.216788000 | 10.392683000 |
| C | 14.021107000 | 15.857867000 | 10.900897000 |
| H | 14.634804000 | 16.247006000 | 10.085893000 |
| H | 14.363852000 | 16.314895000 | 11.833311000 |
| H | 12.988115000 | 16.170059000 | 10.727941000 |
| C | 13.195900000 | 13.804847000 | 12.083007000 |
| H | 12.160066000 | 14.105185000 | 11.915765000 |
| H | 13.523749000 | 14.184721000 | 13.056470000 |
| H | 13.228537000 | 12.710972000 | 12.109799000 |
| C | 9.728789000  | 13.943508000 | 9.818415000  |
| C | 9.157064000  | 14.121836000 | 8.414415000  |
| H | 9.241266000  | 13.192070000 | 7.843503000  |
| H | 9.698183000  | 14.905522000 | 7.881881000  |
| H | 8.100793000  | 14.405295000 | 8.462564000  |
| C | 8.957019000  | 12.862052000 | 10.569784000 |
| H | 9.399254000  | 12.697596000 | 11.557534000 |
| H | 8.986659000  | 11.916345000 | 10.019030000 |
| H | 7.909841000  | 13.152158000 | 10.704133000 |
| C | 9.679567000  | 15.258618000 | 10.590369000 |
| H | 10.273272000 | 16.028475000 | 10.094825000 |
| H | 10.068475000 | 15.125752000 | 11.603861000 |
| H | 8.653413000  | 15.626627000 | 10.666932000 |
| C | 13.105646000 | 11.757058000 | 7.353893000  |
| C | 14.624248000 | 11.908489000 | 7.271705000  |
| H | 15.108434000 | 10.935077000 | 7.136500000  |
| H | 15.001832000 | 12.368050000 | 8.187734000  |
| H | 14.893550000 | 12.548118000 | 6.425881000  |
| C | 12.557685000 | 11.165064000 | 6.058348000  |
| H | 12.820991000 | 11.801791000 | 5.207870000  |
| H | 11.466772000 | 11.087052000 | 6.104789000  |
| H | 12.969069000 | 10.166162000 | 5.879868000  |
| C | 12.713585000 | 10.881476000 | 8.542235000  |
| H | 13.134765000 | 9.876520000  | 8.431917000  |
| H | 11.625888000 | 10.795272000 | 8.615582000  |
| H | 13.089984000 | 11.312693000 | 9.473532000  |
| C | 11.734912000 | 15.172576000 | 4.118542000  |
| C | 13.085895000 | 15.181492000 | 4.824566000  |
| H | 13.097944000 | 15.933024000 | 5.616671000  |
| H | 13.888370000 | 15.417313000 | 4.120625000  |
| H | 13.281261000 | 14.215824000 | 5.295584000  |
| C | 10.633887000 | 14.762563000 | 5.089966000  |
| H | 10.581895000 | 15.460815000 | 5.928138000  |
| H | 10.854449000 | 13.778203000 | 5.508662000  |
| H | 9.660218000  | 14.748095000 | 4.594860000  |
| C | 11.765853000 | 14.220822000 | 2.927119000  |
| H | 12.529874000 | 14.535358000 | 2.208899000  |
| H | 10.796918000 | 14.213296000 | 2.417599000  |
| H | 11.994684000 | 13.199812000 | 3.249551000  |
| C | 11.039757000 | 19.131223000 | 1.901475000  |
| C | 12.437732000 | 18.732749000 | 1.432863000  |
| H | 12.518347000 | 18.782761000 | 0.341457000  |
| H | 12.661366000 | 17.714082000 | 1.759216000  |
| H | 13.180101000 | 19.409701000 | 1.865246000  |
| C | 9.983483000  | 18.206808000 | 1.298649000  |
| H | 9.995761000  | 18.282740000 | 0.206031000  |
| H | 8.984805000  | 18.475584000 | 1.653419000  |
| H | 10.179751000 | 17.167350000 | 1.573953000  |
| C | 10.745752000 | 20.579538000 | 1.523301000  |
| H | 9.754254000  | 20.877184000 | 1.879046000  |

|    |              |              |              |
|----|--------------|--------------|--------------|
| H  | 10.777132000 | 20.714107000 | 0.437004000  |
| H  | 11.487730000 | 21.245284000 | 1.973198000  |
| C  | 8.081046000  | 17.956729000 | 5.119762000  |
| C  | 6.779281000  | 17.740987000 | 4.352463000  |
| H  | 6.817310000  | 18.256830000 | 3.387648000  |
| H  | 5.923068000  | 18.124499000 | 4.916915000  |
| H  | 6.620711000  | 16.674165000 | 4.164046000  |
| C  | 8.322163000  | 19.447391000 | 5.347563000  |
| H  | 9.276710000  | 19.604477000 | 5.854973000  |
| H  | 7.528634000  | 19.874149000 | 5.969431000  |
| H  | 8.343019000  | 19.984125000 | 4.394928000  |
| C  | 8.034856000  | 17.209759000 | 6.451506000  |
| H  | 7.939716000  | 16.134359000 | 6.278218000  |
| H  | 7.185421000  | 17.541068000 | 7.057177000  |
| H  | 8.941786000  | 17.392330000 | 7.033357000  |
| U  | 15.308662000 | 19.831173000 | 8.586281000  |
| Si | 17.760769000 | 18.170733000 | 6.252538000  |
| Si | 14.454092000 | 23.169049000 | 6.983383000  |
| Si | 16.500590000 | 19.785663000 | 12.048538000 |
| O  | 16.805380000 | 18.943563000 | 7.323449000  |
| O  | 17.673606000 | 16.506982000 | 6.372584000  |
| O  | 17.426723000 | 18.561192000 | 4.668106000  |
| O  | 19.307074000 | 18.730181000 | 6.524248000  |
| O  | 14.848156000 | 21.730260000 | 7.627166000  |
| O  | 12.946833000 | 23.232039000 | 6.278316000  |
| O  | 15.537844000 | 23.633248000 | 5.795256000  |
| O  | 14.419842000 | 24.264783000 | 8.240733000  |
| O  | 16.038151000 | 19.245379000 | 10.586545000 |
| O  | 15.412315000 | 20.817490000 | 12.794170000 |
| O  | 16.630096000 | 18.451069000 | 13.036436000 |
| O  | 17.924382000 | 20.666239000 | 11.984407000 |
| C  | 17.252753000 | 15.695698000 | 7.483770000  |
| C  | 17.775755000 | 16.263137000 | 8.799814000  |
| H  | 17.315497000 | 17.228800000 | 9.014198000  |
| H  | 17.545919000 | 15.590771000 | 9.630683000  |
| H  | 18.860084000 | 16.396680000 | 8.758889000  |
| C  | 15.730575000 | 15.619167000 | 7.489871000  |
| H  | 15.368093000 | 14.939930000 | 8.264639000  |
| H  | 15.290778000 | 16.604514000 | 7.673159000  |
| H  | 15.368552000 | 15.253305000 | 6.525349000  |
| C  | 17.848378000 | 14.314666000 | 7.226756000  |
| H  | 18.942543000 | 14.359728000 | 7.220265000  |
| H  | 17.535672000 | 13.608057000 | 8.001992000  |
| H  | 17.516432000 | 13.930906000 | 6.256924000  |
| C  | 16.285545000 | 18.149405000 | 3.898741000  |
| C  | 15.019469000 | 18.181577000 | 4.748424000  |
| H  | 14.895563000 | 19.165462000 | 5.201336000  |
| H  | 14.136767000 | 17.969570000 | 4.140499000  |
| H  | 15.068215000 | 17.440812000 | 5.548466000  |
| C  | 16.541769000 | 16.746453000 | 3.352532000  |
| H  | 16.670734000 | 16.041896000 | 4.177022000  |
| H  | 15.705624000 | 16.415943000 | 2.727102000  |
| H  | 17.451941000 | 16.734176000 | 2.743333000  |
| C  | 16.176672000 | 19.150888000 | 2.753440000  |
| H  | 17.131042000 | 19.225802000 | 2.222133000  |
| H  | 15.407215000 | 18.839439000 | 2.041218000  |
| H  | 15.912849000 | 20.142216000 | 3.132433000  |
| C  | 20.541600000 | 18.221685000 | 6.002946000  |
| C  | 21.106355000 | 17.218592000 | 7.006257000  |
| H  | 20.441060000 | 16.355115000 | 7.089533000  |
| H  | 22.094461000 | 16.863757000 | 6.693637000  |
| H  | 21.202156000 | 17.679654000 | 7.994116000  |
| C  | 20.358887000 | 17.552564000 | 4.641534000  |

|   |              |              |              |
|---|--------------|--------------|--------------|
| H | 19.925809000 | 18.249409000 | 3.920551000  |
| H | 21.326733000 | 17.207758000 | 4.261946000  |
| H | 19.695908000 | 16.686497000 | 4.724679000  |
| C | 21.463285000 | 19.432038000 | 5.877427000  |
| H | 21.573114000 | 19.927671000 | 6.847429000  |
| H | 22.457191000 | 19.136267000 | 5.525640000  |
| H | 21.045745000 | 20.154730000 | 5.169171000  |
| C | 12.529701000 | 22.528751000 | 5.091517000  |
| C | 11.049186000 | 22.221594000 | 5.280368000  |
| H | 10.478292000 | 23.141765000 | 5.443778000  |
| H | 10.651501000 | 21.703437000 | 4.404103000  |
| H | 10.914431000 | 21.568992000 | 6.145961000  |
| C | 13.295827000 | 21.223576000 | 4.911296000  |
| H | 13.178641000 | 20.585699000 | 5.790420000  |
| H | 12.899620000 | 20.672701000 | 4.054966000  |
| H | 14.361022000 | 21.414548000 | 4.755105000  |
| C | 12.759230000 | 23.459995000 | 3.904761000  |
| H | 13.822739000 | 23.701313000 | 3.824302000  |
| H | 12.432901000 | 22.994077000 | 2.969346000  |
| H | 12.200128000 | 24.392540000 | 4.036384000  |
| C | 16.955897000 | 23.402558000 | 5.796264000  |
| C | 17.542242000 | 23.513745000 | 7.202965000  |
| H | 17.349620000 | 24.501893000 | 7.630928000  |
| H | 17.102179000 | 22.760904000 | 7.860909000  |
| H | 18.624507000 | 23.352221000 | 7.175132000  |
| C | 17.546493000 | 24.484413000 | 4.896731000  |
| H | 17.103671000 | 24.431128000 | 3.896936000  |
| H | 17.343571000 | 25.478624000 | 5.308008000  |
| H | 18.630650000 | 24.364011000 | 4.801247000  |
| C | 17.224264000 | 22.018659000 | 5.213100000  |
| H | 16.763836000 | 21.240008000 | 5.823270000  |
| H | 16.814201000 | 21.952051000 | 4.201382000  |
| H | 18.298159000 | 21.814243000 | 5.159079000  |
| C | 13.902502000 | 25.600158000 | 8.241280000  |
| C | 12.406028000 | 25.534769000 | 8.538021000  |
| H | 11.974320000 | 26.539242000 | 8.609035000  |
| H | 11.894328000 | 24.984734000 | 7.744505000  |
| H | 12.234748000 | 25.017023000 | 9.486144000  |
| C | 14.639178000 | 26.326647000 | 9.363696000  |
| H | 14.469331000 | 25.823136000 | 10.320980000 |
| H | 15.716345000 | 26.336153000 | 9.168877000  |
| H | 14.293522000 | 27.361673000 | 9.453726000  |
| C | 14.153249000 | 26.299732000 | 6.907092000  |
| H | 13.781937000 | 27.329346000 | 6.945072000  |
| H | 15.221400000 | 26.323479000 | 6.675746000  |
| H | 13.638719000 | 25.778434000 | 6.095290000  |
| C | 15.120375000 | 22.169123000 | 12.400518000 |
| C | 15.108156000 | 22.296976000 | 10.880910000 |
| H | 16.097593000 | 22.078558000 | 10.464620000 |
| H | 14.357384000 | 21.613288000 | 10.468145000 |
| H | 14.833078000 | 23.299236000 | 10.548105000 |
| C | 16.161857000 | 23.102070000 | 13.012528000 |
| H | 17.159598000 | 22.832093000 | 12.660378000 |
| H | 15.955061000 | 24.142934000 | 12.741228000 |
| H | 16.145701000 | 23.022224000 | 14.104559000 |
| C | 13.733046000 | 22.480011000 | 12.951886000 |
| H | 12.986655000 | 21.820474000 | 12.503690000 |
| H | 13.713011000 | 22.339293000 | 14.037057000 |
| H | 13.453921000 | 23.515723000 | 12.732145000 |
| C | 16.684816000 | 18.412246000 | 14.468629000 |
| C | 15.258730000 | 18.495859000 | 15.009409000 |
| H | 15.248030000 | 18.427969000 | 16.102680000 |
| H | 14.801069000 | 19.441034000 | 14.707999000 |

|   |              |              |              |
|---|--------------|--------------|--------------|
| H | 14.659648000 | 17.673430000 | 14.607281000 |
| C | 17.538393000 | 19.550738000 | 15.023422000 |
| H | 17.601622000 | 19.480542000 | 16.114564000 |
| H | 18.551716000 | 19.509606000 | 14.614500000 |
| H | 17.103045000 | 20.519969000 | 14.765662000 |
| C | 17.307564000 | 17.063431000 | 14.817232000 |
| H | 18.322294000 | 16.992521000 | 14.412845000 |
| H | 17.356059000 | 16.922861000 | 15.902021000 |
| H | 16.712165000 | 16.250320000 | 14.390220000 |
| C | 19.069792000 | 20.446667000 | 11.150876000 |
| C | 20.254040000 | 21.042733000 | 11.907189000 |
| H | 20.395563000 | 20.525773000 | 12.861437000 |
| H | 21.176034000 | 20.951418000 | 11.323751000 |
| H | 20.080719000 | 22.103372000 | 12.115435000 |
| C | 19.294107000 | 18.958781000 | 10.899043000 |
| H | 18.435326000 | 18.525746000 | 10.382576000 |
| H | 20.180768000 | 18.805889000 | 10.275858000 |
| H | 19.435743000 | 18.424884000 | 11.843254000 |
| C | 18.859228000 | 21.192662000 | 9.835129000  |
| H | 18.661218000 | 22.252032000 | 10.022698000 |
| H | 19.735849000 | 21.111012000 | 9.185543000  |
| H | 18.011461000 | 20.773148000 | 9.288298000  |

[<sup>Si</sup>L<sub>3</sub>USU<sup>Si</sup>L<sub>3</sub>]<sup>2-</sup> E = -5635.31482310

|    |              |              |              |
|----|--------------|--------------|--------------|
| U  | 11.526219000 | 17.695952000 | 8.224022000  |
| Si | 8.904670000  | 19.381456000 | 10.198676000 |
| Si | 11.747237000 | 14.251691000 | 9.661376000  |
| Si | 9.760659000  | 17.667440000 | 4.890091000  |
| S  | 13.592056000 | 19.350367000 | 7.669257000  |
| O  | 10.301024000 | 18.709385000 | 9.735990000  |
| O  | 8.923058000  | 21.053815000 | 10.103938000 |
| O  | 8.469989000  | 19.056167000 | 11.782750000 |
| O  | 7.691961000  | 18.720735000 | 9.259889000  |
| O  | 11.298745000 | 15.578140000 | 8.859550000  |
| O  | 13.231574000 | 14.356613000 | 10.432744000 |
| O  | 10.659508000 | 13.813589000 | 10.864037000 |
| O  | 11.906488000 | 13.027908000 | 8.535690000  |
| O  | 10.324817000 | 17.639909000 | 6.405849000  |
| O  | 10.859254000 | 18.120912000 | 3.716586000  |
| O  | 8.533364000  | 18.798326000 | 4.831117000  |
| O  | 9.198359000  | 16.168838000 | 4.385539000  |
| C  | 9.492390000  | 21.846767000 | 9.050273000  |
| C  | 9.213136000  | 21.233991000 | 7.679377000  |
| H  | 9.714606000  | 20.270871000 | 7.557886000  |
| H  | 9.578963000  | 21.894871000 | 6.888392000  |
| H  | 8.140204000  | 21.080259000 | 7.534470000  |
| C  | 10.993307000 | 21.985892000 | 9.285000000  |
| H  | 11.442563000 | 22.643529000 | 8.536075000  |
| H  | 11.493368000 | 21.016615000 | 9.215029000  |
| H  | 11.184334000 | 22.410499000 | 10.276412000 |
| C  | 8.809430000  | 23.208275000 | 9.156995000  |
| H  | 7.730583000  | 23.110482000 | 8.996131000  |
| H  | 9.209241000  | 23.903779000 | 8.411691000  |
| H  | 8.969270000  | 23.639646000 | 10.150798000 |
| C  | 9.112318000  | 19.562607000 | 12.959338000 |
| C  | 10.617749000 | 19.716458000 | 12.748904000 |
| H  | 11.062578000 | 18.764816000 | 12.449769000 |
| H  | 11.095329000 | 20.054287000 | 13.674836000 |
| H  | 10.829908000 | 20.449714000 | 11.966104000 |
| C  | 8.481536000  | 20.908409000 | 13.313519000 |
| H  | 8.640260000  | 21.615936000 | 12.496123000 |
| H  | 8.917855000  | 21.319472000 | 14.230741000 |
| H  | 7.403279000  | 20.793066000 | 13.468195000 |

|   |              |              |              |
|---|--------------|--------------|--------------|
| C | 8.839464000  | 18.536035000 | 14.055181000 |
| H | 7.761792000  | 18.391179000 | 14.183675000 |
| H | 9.260769000  | 18.862055000 | 15.012147000 |
| H | 9.283925000  | 17.571880000 | 13.791055000 |
| C | 6.277216000  | 18.822683000 | 9.431217000  |
| C | 5.675623000  | 18.542342000 | 8.056974000  |
| H | 6.039423000  | 19.271055000 | 7.326762000  |
| H | 4.581651000  | 18.591123000 | 8.087532000  |
| H | 5.970566000  | 17.547891000 | 7.711884000  |
| C | 5.868605000  | 20.214488000 | 9.910894000  |
| H | 6.306002000  | 20.431500000 | 10.888998000 |
| H | 4.778447000  | 20.280010000 | 9.997112000  |
| H | 6.208694000  | 20.979456000 | 9.207725000  |
| C | 5.831835000  | 17.760564000 | 10.435456000 |
| H | 6.129170000  | 16.768034000 | 10.083621000 |
| H | 4.743547000  | 17.770624000 | 10.564501000 |
| H | 6.307489000  | 17.943361000 | 11.402095000 |
| C | 13.509457000 | 15.049206000 | 11.659196000 |
| C | 14.992388000 | 15.396689000 | 11.614477000 |
| H | 15.593598000 | 14.492117000 | 11.477230000 |
| H | 15.304203000 | 15.879197000 | 12.545624000 |
| H | 15.195802000 | 16.080213000 | 10.785563000 |
| C | 12.688022000 | 16.330265000 | 11.785032000 |
| H | 12.920778000 | 17.024494000 | 10.970642000 |
| H | 12.916525000 | 16.832197000 | 12.730331000 |
| H | 11.618293000 | 16.114786000 | 11.765951000 |
| C | 13.210070000 | 14.107842000 | 12.824806000 |
| H | 12.152264000 | 13.833968000 | 12.818352000 |
| H | 13.449947000 | 14.582330000 | 13.782770000 |
| H | 13.807046000 | 13.193822000 | 12.737069000 |
| C | 9.248842000  | 14.072520000 | 10.884467000 |
| C | 8.633331000  | 13.884397000 | 9.499652000  |
| H | 8.843503000  | 12.879682000 | 9.119559000  |
| H | 9.044689000  | 14.616719000 | 8.802123000  |
| H | 7.547199000  | 14.016654000 | 9.544877000  |
| C | 8.661949000  | 13.059164000 | 11.863916000 |
| H | 9.126392000  | 13.166459000 | 12.849641000 |
| H | 8.840522000  | 12.037972000 | 11.511253000 |
| H | 7.581942000  | 13.202852000 | 11.974714000 |
| C | 9.014853000  | 15.496011000 | 11.384416000 |
| H | 9.466495000  | 16.223803000 | 10.706405000 |
| H | 9.459581000  | 15.622133000 | 12.376570000 |
| H | 7.946567000  | 15.718648000 | 11.462149000 |
| C | 12.548714000 | 11.760318000 | 8.677140000  |
| C | 14.045101000 | 11.949629000 | 8.434511000  |
| H | 14.578947000 | 10.993568000 | 8.478441000  |
| H | 14.456785000 | 12.622231000 | 9.190799000  |
| H | 14.210717000 | 12.394757000 | 7.449031000  |
| C | 11.938436000 | 10.869406000 | 7.597818000  |
| H | 12.082702000 | 11.318296000 | 6.609910000  |
| H | 10.862487000 | 10.753022000 | 7.764239000  |
| H | 12.398698000 | 9.875564000  | 7.598250000  |
| C | 12.303012000 | 11.158623000 | 10.059719000 |
| H | 12.768988000 | 10.170027000 | 10.134430000 |
| H | 11.231874000 | 11.054236000 | 10.252580000 |
| H | 12.728099000 | 11.799746000 | 10.836261000 |
| C | 12.009605000 | 17.397179000 | 3.256544000  |
| C | 12.791495000 | 16.796005000 | 4.423484000  |
| H | 12.189105000 | 16.059819000 | 4.965419000  |
| H | 13.100734000 | 17.574540000 | 5.127402000  |
| H | 13.690484000 | 16.292160000 | 4.053100000  |
| C | 11.559356000 | 16.304775000 | 2.287850000  |
| H | 10.893772000 | 15.603866000 | 2.795565000  |

|    |              |              |              |
|----|--------------|--------------|--------------|
| H  | 12.423027000 | 15.759076000 | 1.892112000  |
| H  | 11.015337000 | 16.743915000 | 1.444402000  |
| C  | 12.865221000 | 18.429413000 | 2.528770000  |
| H  | 13.189026000 | 19.206757000 | 3.225219000  |
| H  | 12.288504000 | 18.899885000 | 1.725295000  |
| H  | 13.751302000 | 17.962000000 | 2.087191000  |
| C  | 8.037211000  | 19.530404000 | 3.710532000  |
| C  | 8.986378000  | 20.695491000 | 3.431401000  |
| H  | 8.616090000  | 21.322653000 | 2.612450000  |
| H  | 9.975827000  | 20.313186000 | 3.169823000  |
| H  | 9.084074000  | 21.315132000 | 4.328146000  |
| C  | 7.902664000  | 18.633226000 | 2.480647000  |
| H  | 7.480139000  | 19.193600000 | 1.639341000  |
| H  | 7.247842000  | 17.783181000 | 2.694519000  |
| H  | 8.881997000  | 18.248689000 | 2.184433000  |
| C  | 6.666605000  | 20.053661000 | 4.135146000  |
| H  | 5.993614000  | 19.221454000 | 4.364711000  |
| H  | 6.213224000  | 20.657851000 | 3.342058000  |
| H  | 6.762113000  | 20.675277000 | 5.030809000  |
| C  | 8.576889000  | 15.165291000 | 5.197968000  |
| C  | 7.797813000  | 14.278710000 | 4.228545000  |
| H  | 7.035162000  | 14.862256000 | 3.702304000  |
| H  | 7.300755000  | 13.459558000 | 4.759044000  |
| H  | 8.471511000  | 13.845487000 | 3.481889000  |
| C  | 7.625829000  | 15.798513000 | 6.211869000  |
| H  | 8.173679000  | 16.449786000 | 6.897471000  |
| H  | 7.117674000  | 15.026981000 | 6.799742000  |
| H  | 6.868526000  | 16.397409000 | 5.697352000  |
| C  | 9.663232000  | 14.356134000 | 5.900163000  |
| H  | 10.367098000 | 13.953156000 | 5.164083000  |
| H  | 9.230652000  | 13.513517000 | 6.449249000  |
| H  | 10.217410000 | 14.973169000 | 6.610740000  |
| U  | 16.127233000 | 20.081206000 | 8.140437000  |
| Si | 18.316558000 | 17.511336000 | 6.432030000  |
| Si | 15.765903000 | 23.349255000 | 6.732339000  |
| Si | 17.701132000 | 20.419526000 | 11.425246000 |
| O  | 17.560562000 | 18.609683000 | 7.345208000  |
| O  | 17.497232000 | 16.053237000 | 6.329562000  |
| O  | 18.559536000 | 17.961233000 | 4.837051000  |
| O  | 19.845640000 | 17.310710000 | 7.079453000  |
| O  | 16.440361000 | 21.887225000 | 6.924268000  |
| O  | 14.157805000 | 23.377047000 | 6.295555000  |
| O  | 16.566937000 | 24.231397000 | 5.543701000  |
| O  | 15.830732000 | 24.132596000 | 8.207480000  |
| O  | 16.842111000 | 20.805888000 | 10.112073000 |
| O  | 16.799443000 | 20.170957000 | 12.815045000 |
| O  | 18.544104000 | 19.015913000 | 11.088179000 |
| O  | 18.779324000 | 21.623608000 | 11.878996000 |
| C  | 16.867584000 | 15.333005000 | 7.399605000  |
| C  | 17.559072000 | 15.603868000 | 8.733900000  |
| H  | 17.469500000 | 16.658744000 | 9.007158000  |
| H  | 17.103245000 | 15.000158000 | 9.523497000  |
| H  | 18.621604000 | 15.351868000 | 8.673887000  |
| C  | 15.398968000 | 15.744731000 | 7.464778000  |
| H  | 14.864626000 | 15.203386000 | 8.252925000  |
| H  | 15.306011000 | 16.816634000 | 7.665918000  |
| H  | 14.899009000 | 15.543000000 | 6.511603000  |
| C  | 17.003591000 | 13.856652000 | 7.037006000  |
| H  | 18.060499000 | 13.579445000 | 6.963960000  |
| H  | 16.531968000 | 13.224091000 | 7.794440000  |
| H  | 16.529469000 | 13.652487000 | 6.071604000  |
| C  | 17.545733000 | 18.098487000 | 3.830324000  |
| C  | 16.260433000 | 18.678799000 | 4.412740000  |



|   |              |              |              |
|---|--------------|--------------|--------------|
| H | 16.448630000 | 19.651575000 | 4.874958000  |
| H | 15.514013000 | 18.814406000 | 3.626413000  |
| H | 15.834652000 | 18.015507000 | 5.170383000  |
| C | 17.279309000 | 16.726506000 | 3.212952000  |
| H | 16.917143000 | 16.039378000 | 3.981111000  |
| H | 16.531532000 | 16.794983000 | 2.415114000  |
| H | 18.200623000 | 16.315542000 | 2.785692000  |
| C | 18.127561000 | 19.052788000 | 2.791239000  |
| H | 19.058916000 | 18.649536000 | 2.379481000  |
| H | 17.424412000 | 19.210201000 | 1.966570000  |
| H | 18.345736000 | 20.022236000 | 3.249407000  |
| C | 21.003464000 | 16.742672000 | 6.465830000  |
| C | 21.916799000 | 16.324770000 | 7.616129000  |
| H | 21.429665000 | 15.562235000 | 8.232307000  |
| H | 22.860217000 | 15.913996000 | 7.240710000  |
| H | 22.142082000 | 17.185538000 | 8.253296000  |
| C | 20.646044000 | 15.527267000 | 5.611638000  |
| H | 19.969560000 | 15.813873000 | 4.802186000  |
| H | 21.549443000 | 15.090182000 | 5.172247000  |
| H | 20.151899000 | 14.762447000 | 6.217312000  |
| C | 21.678012000 | 17.817026000 | 5.612603000  |
| H | 21.918590000 | 18.690058000 | 6.228379000  |
| H | 22.605895000 | 17.442577000 | 5.165692000  |
| H | 21.002187000 | 18.134766000 | 4.814750000  |
| C | 13.572639000 | 22.934453000 | 5.062995000  |
| C | 12.146941000 | 22.515582000 | 5.407438000  |
| H | 11.597617000 | 23.356153000 | 5.845084000  |
| H | 11.612325000 | 22.181624000 | 4.512589000  |
| H | 12.166007000 | 21.690785000 | 6.125530000  |
| C | 14.330413000 | 21.743545000 | 4.484021000  |
| H | 14.305974000 | 20.906522000 | 5.187331000  |
| H | 13.865722000 | 21.427264000 | 3.544659000  |
| H | 15.372737000 | 22.001768000 | 4.276479000  |
| C | 13.582465000 | 24.110874000 | 4.088863000  |
| H | 14.611499000 | 24.427639000 | 3.897662000  |
| H | 13.111750000 | 23.837698000 | 3.137917000  |
| H | 13.033430000 | 24.959374000 | 4.511663000  |
| C | 17.968669000 | 24.137589000 | 5.256861000  |
| C | 18.789022000 | 24.146670000 | 6.546893000  |
| H | 18.578514000 | 25.048661000 | 7.128826000  |
| H | 18.544847000 | 23.274374000 | 7.158980000  |
| H | 19.861035000 | 24.121064000 | 6.322769000  |
| C | 18.296078000 | 25.366006000 | 4.412457000  |
| H | 17.682817000 | 25.379266000 | 3.505361000  |
| H | 18.092725000 | 26.282469000 | 4.976019000  |
| H | 19.350405000 | 25.368603000 | 4.116127000  |
| C | 18.236044000 | 22.856722000 | 4.465752000  |
| H | 17.960997000 | 21.988616000 | 5.069512000  |
| H | 17.642684000 | 22.847987000 | 3.545387000  |
| H | 19.294319000 | 22.778655000 | 4.193146000  |
| C | 15.036365000 | 25.226608000 | 8.672099000  |
| C | 13.670743000 | 24.695760000 | 9.105297000  |
| H | 13.059292000 | 25.492034000 | 9.544989000  |
| H | 13.146909000 | 24.275965000 | 8.244972000  |
| H | 13.796391000 | 23.902947000 | 9.848564000  |
| C | 15.784995000 | 25.800956000 | 9.872102000  |
| H | 15.902603000 | 25.036220000 | 10.645001000 |
| H | 16.780772000 | 26.145048000 | 9.574808000  |
| H | 15.239826000 | 26.647549000 | 10.303276000 |
| C | 14.884616000 | 26.289454000 | 7.585011000  |
| H | 14.318426000 | 27.148301000 | 7.962068000  |
| H | 15.865611000 | 26.639790000 | 7.250851000  |
| H | 14.355210000 | 25.876554000 | 6.722392000  |

|   |              |              |              |
|---|--------------|--------------|--------------|
| C | 15.397634000 | 20.437265000 | 12.976696000 |
| C | 14.586776000 | 19.452788000 | 12.137505000 |
| H | 14.758873000 | 19.612007000 | 11.070019000 |
| H | 14.874655000 | 18.426182000 | 12.379854000 |
| H | 13.515260000 | 19.567987000 | 12.323810000 |
| C | 15.078258000 | 21.877902000 | 12.581460000 |
| H | 15.324261000 | 22.039621000 | 11.529070000 |
| H | 14.013312000 | 22.089676000 | 12.725597000 |
| H | 15.656997000 | 22.580770000 | 13.190479000 |
| C | 15.115294000 | 20.216916000 | 14.460555000 |
| H | 15.348632000 | 19.185631000 | 14.745878000 |
| H | 15.729754000 | 20.887812000 | 15.070117000 |
| H | 14.061681000 | 20.407220000 | 14.689501000 |
| C | 19.144794000 | 18.082467000 | 11.984603000 |
| C | 18.072346000 | 17.088253000 | 12.424628000 |
| H | 18.490505000 | 16.306468000 | 13.068712000 |
| H | 17.286044000 | 17.614931000 | 12.971588000 |
| H | 17.624432000 | 16.614968000 | 11.547338000 |
| C | 19.754132000 | 18.783888000 | 13.197402000 |
| H | 20.258630000 | 18.057990000 | 13.844719000 |
| H | 20.484415000 | 19.534388000 | 12.882702000 |
| H | 18.976946000 | 19.284297000 | 13.782578000 |
| C | 20.231079000 | 17.380105000 | 11.173698000 |
| H | 21.008983000 | 18.093376000 | 10.883315000 |
| H | 20.696878000 | 16.572962000 | 11.749466000 |
| H | 19.801926000 | 16.960321000 | 10.260343000 |
| C | 19.543659000 | 22.421233000 | 10.964374000 |
| C | 20.675539000 | 23.020221000 | 11.795929000 |
| H | 21.313383000 | 22.228150000 | 12.202248000 |
| H | 21.297585000 | 23.689004000 | 11.191512000 |
| H | 20.266499000 | 23.592734000 | 12.635066000 |
| C | 20.119108000 | 21.576634000 | 9.827047000  |
| H | 19.320796000 | 21.138730000 | 9.221401000  |
| H | 20.741986000 | 22.193859000 | 9.170809000  |
| H | 20.730866000 | 20.759691000 | 10.220221000 |
| C | 18.642870000 | 23.522402000 | 10.409648000 |
| H | 18.232243000 | 24.115043000 | 11.233619000 |
| H | 19.200788000 | 24.194045000 | 9.748561000  |
| H | 17.811431000 | 23.089473000 | 9.849642000  |

$[\text{SiL}_3\text{USUSiL}_3]^{1-}$  E = -5635.25847439

|    |              |              |              |
|----|--------------|--------------|--------------|
| U  | 11.814864000 | 17.238274000 | 8.201527000  |
| Si | 9.442673000  | 19.505201000 | 9.959801000  |
| Si | 11.574950000 | 13.970502000 | 9.852863000  |
| Si | 10.023001000 | 16.898813000 | 5.151096000  |
| S  | 14.006031000 | 17.977581000 | 9.406689000  |
| O  | 10.577849000 | 18.573463000 | 9.234798000  |
| O  | 9.791595000  | 21.121037000 | 9.764027000  |
| O  | 9.279225000  | 19.247519000 | 11.592221000 |
| O  | 8.001695000  | 19.070154000 | 9.257874000  |
| O  | 11.457499000 | 15.533963000 | 9.379674000  |
| O  | 13.066742000 | 13.555022000 | 10.447905000 |
| O  | 10.458387000 | 13.625387000 | 11.041516000 |
| O  | 11.365166000 | 13.075297000 | 8.465519000  |
| O  | 10.296085000 | 16.787727000 | 6.762136000  |
| O  | 11.436695000 | 16.719675000 | 4.281105000  |
| O  | 9.483170000  | 18.445099000 | 4.882640000  |
| O  | 8.946848000  | 15.752476000 | 4.607781000  |
| C  | 10.260521000 | 21.749146000 | 8.557298000  |
| C  | 9.603554000  | 21.139631000 | 7.321709000  |
| H  | 9.892030000  | 20.095956000 | 7.174004000  |
| H  | 9.904557000  | 21.700855000 | 6.432723000  |
| H  | 8.513851000  | 21.179409000 | 7.401483000  |

|   |              |              |              |
|---|--------------|--------------|--------------|
| C | 11.777027000 | 21.612611000 | 8.482042000  |
| H | 12.175471000 | 22.123667000 | 7.602795000  |
| H | 12.068019000 | 20.558619000 | 8.436527000  |
| H | 12.245710000 | 22.047398000 | 9.369083000  |
| C | 9.864066000  | 23.216679000 | 8.684021000  |
| H | 8.774433000  | 23.316538000 | 8.725351000  |
| H | 10.232850000 | 23.791840000 | 7.829686000  |
| H | 10.282528000 | 23.646918000 | 9.598591000  |
| C | 10.267410000 | 19.399426000 | 12.627911000 |
| C | 11.513172000 | 18.590466000 | 12.285351000 |
| H | 11.246344000 | 17.551273000 | 12.083656000 |
| H | 12.222887000 | 18.606823000 | 13.117698000 |
| H | 12.018761000 | 18.979429000 | 11.398389000 |
| C | 10.608775000 | 20.876425000 | 12.804770000 |
| H | 11.065427000 | 21.277055000 | 11.897740000 |
| H | 11.304240000 | 21.008614000 | 13.639524000 |
| H | 9.703548000  | 21.456273000 | 13.012855000 |
| C | 9.604682000  | 18.854080000 | 13.889147000 |
| H | 8.685396000  | 19.407386000 | 14.107638000 |
| H | 10.275468000 | 18.945198000 | 14.749494000 |
| H | 9.348699000  | 17.798443000 | 13.760019000 |
| C | 6.671204000  | 19.344302000 | 9.713926000  |
| C | 5.788110000  | 19.256386000 | 8.472774000  |
| H | 6.093098000  | 20.004917000 | 7.734565000  |
| H | 4.736553000  | 19.426536000 | 8.726315000  |
| H | 5.880037000  | 18.268606000 | 8.011312000  |
| C | 6.574303000  | 20.735530000 | 10.337071000 |
| H | 7.209911000  | 20.806803000 | 11.224372000 |
| H | 5.542518000  | 20.946361000 | 10.637624000 |
| H | 6.889786000  | 21.501743000 | 9.623502000  |
| C | 6.283244000  | 18.272149000 | 10.730268000 |
| H | 6.379330000  | 17.278699000 | 10.281389000 |
| H | 5.248168000  | 18.402409000 | 11.064778000 |
| H | 6.945069000  | 18.326962000 | 11.598110000 |
| C | 13.664290000 | 13.932027000 | 11.702780000 |
| C | 15.168688000 | 13.889306000 | 11.460629000 |
| H | 15.472230000 | 12.896004000 | 11.113662000 |
| H | 15.719097000 | 14.116919000 | 12.378420000 |
| H | 15.446625000 | 14.623905000 | 10.699438000 |
| C | 13.234653000 | 15.334760000 | 12.118764000 |
| H | 13.489639000 | 16.068284000 | 11.348136000 |
| H | 13.737517000 | 15.623327000 | 13.047798000 |
| H | 12.155307000 | 15.369202000 | 12.293125000 |
| C | 13.246301000 | 12.902803000 | 12.749411000 |
| H | 12.158642000 | 12.907137000 | 12.863004000 |
| H | 13.701964000 | 13.126723000 | 13.719981000 |
| H | 13.560809000 | 11.898538000 | 12.446510000 |
| C | 9.109943000  | 14.128657000 | 11.112034000 |
| C | 8.460160000  | 14.130014000 | 9.731210000  |
| H | 8.506413000  | 13.133941000 | 9.283115000  |
| H | 8.966866000  | 14.835381000 | 9.068296000  |
| H | 7.410174000  | 14.431712000 | 9.802251000  |
| C | 8.375278000  | 13.176414000 | 12.049176000 |
| H | 8.870621000  | 13.146417000 | 13.024913000 |
| H | 8.369228000  | 12.161873000 | 11.638042000 |
| H | 7.339015000  | 13.497085000 | 12.196940000 |
| C | 9.135852000  | 15.541120000 | 11.688184000 |
| H | 9.664995000  | 16.219571000 | 11.016828000 |
| H | 9.639615000  | 15.543780000 | 12.659767000 |
| H | 8.119444000  | 15.921591000 | 11.826137000 |
| C | 11.727206000 | 11.703965000 | 8.243257000  |
| C | 13.217978000 | 11.638623000 | 7.915938000  |
| H | 13.519835000 | 10.614005000 | 7.673370000  |

|    |              |              |              |
|----|--------------|--------------|--------------|
| H  | 13.805016000 | 11.989561000 | 8.767842000  |
| H  | 13.443310000 | 12.276968000 | 7.055859000  |
| C  | 10.897442000 | 11.248696000 | 7.047065000  |
| H  | 11.103216000 | 11.882646000 | 6.179710000  |
| H  | 9.829235000  | 11.313207000 | 7.275112000  |
| H  | 11.132956000 | 10.212699000 | 6.782510000  |
| C  | 11.407638000 | 10.848866000 | 9.467478000  |
| H  | 11.658107000 | 9.800336000  | 9.275189000  |
| H  | 10.344044000 | 10.908290000 | 9.715390000  |
| H  | 11.984563000 | 11.185254000 | 10.333451000 |
| C  | 12.192854000 | 15.512458000 | 4.072985000  |
| C  | 12.388818000 | 14.752285000 | 5.383603000  |
| H  | 11.439344000 | 14.450454000 | 5.829785000  |
| H  | 12.942775000 | 15.356601000 | 6.112056000  |
| H  | 12.981350000 | 13.849676000 | 5.207042000  |
| C  | 11.474684000 | 14.636010000 | 3.050062000  |
| H  | 10.487191000 | 14.351346000 | 3.418523000  |
| H  | 12.055416000 | 13.730768000 | 2.844704000  |
| H  | 11.345975000 | 15.181362000 | 2.109704000  |
| C  | 13.539661000 | 15.973177000 | 3.529107000  |
| H  | 14.040234000 | 16.619083000 | 4.253921000  |
| H  | 13.400993000 | 16.539136000 | 2.603040000  |
| H  | 14.188907000 | 15.118095000 | 3.318638000  |
| C  | 9.498569000  | 19.195301000 | 3.657719000  |
| C  | 10.857846000 | 19.882570000 | 3.550697000  |
| H  | 10.901672000 | 20.540941000 | 2.677028000  |
| H  | 11.652722000 | 19.136373000 | 3.468847000  |
| H  | 11.039028000 | 20.482764000 | 4.446352000  |
| C  | 9.244145000  | 18.293776000 | 2.451917000  |
| H  | 9.206949000  | 18.888900000 | 1.533399000  |
| H  | 8.292110000  | 17.766278000 | 2.560276000  |
| H  | 10.041729000 | 17.553327000 | 2.347184000  |
| C  | 8.380712000  | 20.224410000 | 3.790307000  |
| H  | 7.413916000  | 19.723803000 | 3.904497000  |
| H  | 8.336470000  | 20.867102000 | 2.905123000  |
| H  | 8.544602000  | 20.854926000 | 4.668066000  |
| C  | 7.899807000  | 15.110640000 | 5.360372000  |
| C  | 6.904054000  | 14.605822000 | 4.321571000  |
| H  | 6.473767000  | 15.443473000 | 3.763695000  |
| H  | 6.088543000  | 14.054789000 | 4.801167000  |
| H  | 7.399886000  | 13.938155000 | 3.609784000  |
| C  | 7.225048000  | 16.097377000 | 6.309868000  |
| H  | 7.936537000  | 16.469555000 | 7.050250000  |
| H  | 6.399083000  | 15.610936000 | 6.838962000  |
| H  | 6.823308000  | 16.949592000 | 5.753125000  |
| C  | 8.516464000  | 13.944517000 | 6.125959000  |
| H  | 8.986642000  | 13.244921000 | 5.428200000  |
| H  | 7.752260000  | 13.401150000 | 6.691186000  |
| H  | 9.276654000  | 14.298341000 | 6.825860000  |
| U  | 15.554121000 | 20.000496000 | 8.392807000  |
| Si | 17.954922000 | 18.230610000 | 6.104901000  |
| Si | 14.812773000 | 23.174960000 | 6.819391000  |
| Si | 17.486332000 | 20.418416000 | 11.264731000 |
| O  | 16.733651000 | 18.865823000 | 6.961103000  |
| O  | 17.865821000 | 16.560636000 | 6.008476000  |
| O  | 18.049621000 | 18.747124000 | 4.517173000  |
| O  | 19.372114000 | 18.729469000 | 6.828483000  |
| O  | 14.867495000 | 21.564186000 | 7.000589000  |
| O  | 13.419260000 | 23.728733000 | 6.073152000  |
| O  | 16.050378000 | 23.787626000 | 5.873930000  |
| O  | 14.821006000 | 23.825998000 | 8.356324000  |
| O  | 17.043990000 | 20.874534000 | 9.767994000  |
| O  | 16.218504000 | 20.340835000 | 12.352456000 |

|   |              |              |              |
|---|--------------|--------------|--------------|
| O | 18.097648000 | 18.868356000 | 11.157263000 |
| O | 18.623081000 | 21.434964000 | 11.956802000 |
| C | 17.315414000 | 15.659365000 | 6.978260000  |
| C | 17.733855000 | 16.049635000 | 8.393109000  |
| H | 17.357505000 | 17.040653000 | 8.658866000  |
| H | 17.340010000 | 15.330826000 | 9.118308000  |
| H | 18.824747000 | 16.059228000 | 8.474447000  |
| C | 15.795356000 | 15.661015000 | 6.836453000  |
| H | 15.336151000 | 14.944718000 | 7.526047000  |
| H | 15.403848000 | 16.654954000 | 7.067319000  |
| H | 15.516469000 | 15.386835000 | 5.814780000  |
| C | 17.876832000 | 14.283648000 | 6.627635000  |
| H | 18.968663000 | 14.282542000 | 6.709146000  |
| H | 17.478428000 | 13.518543000 | 7.302158000  |
| H | 17.610657000 | 14.011735000 | 5.600879000  |
| C | 17.064033000 | 18.591059000 | 3.486137000  |
| C | 15.688910000 | 19.030762000 | 3.986731000  |
| H | 15.727484000 | 20.050866000 | 4.373638000  |
| H | 14.952249000 | 18.989099000 | 3.177921000  |
| H | 15.347265000 | 18.386323000 | 4.800578000  |
| C | 17.030670000 | 17.136854000 | 3.018845000  |
| H | 16.738517000 | 16.476505000 | 3.837450000  |
| H | 16.325829000 | 17.015058000 | 2.189615000  |
| H | 18.023140000 | 16.827203000 | 2.674703000  |
| C | 17.523865000 | 19.493615000 | 2.344516000  |
| H | 18.523167000 | 19.199459000 | 2.007533000  |
| H | 16.838439000 | 19.424963000 | 1.493384000  |
| H | 17.565662000 | 20.535553000 | 2.673124000  |
| C | 20.708161000 | 18.639551000 | 6.322648000  |
| C | 21.615150000 | 18.660117000 | 7.549368000  |
| H | 21.400205000 | 17.804213000 | 8.196571000  |
| H | 22.670404000 | 18.622077000 | 7.258894000  |
| H | 21.446540000 | 19.573030000 | 8.127461000  |
| C | 20.920344000 | 17.351050000 | 5.529973000  |
| H | 20.263106000 | 17.321762000 | 4.656440000  |
| H | 21.957171000 | 17.286089000 | 5.182751000  |
| H | 20.705286000 | 16.476645000 | 6.149634000  |
| C | 20.974185000 | 19.857958000 | 5.439790000  |
| H | 20.821951000 | 20.777898000 | 6.013290000  |
| H | 22.003472000 | 19.853306000 | 5.063994000  |
| H | 20.286843000 | 19.858294000 | 4.590120000  |
| C | 13.115235000 | 23.624138000 | 4.672798000  |
| C | 11.593184000 | 23.629172000 | 4.580123000  |
| H | 11.186922000 | 24.530788000 | 5.049435000  |
| H | 11.263004000 | 23.602799000 | 3.536656000  |
| H | 11.179919000 | 22.757188000 | 5.093463000  |
| C | 13.677466000 | 22.332040000 | 4.081970000  |
| H | 13.319413000 | 21.464912000 | 4.641611000  |
| H | 13.372465000 | 22.225239000 | 3.036003000  |
| H | 14.769890000 | 22.337419000 | 4.120135000  |
| C | 13.700704000 | 24.839708000 | 3.956992000  |
| H | 14.784095000 | 24.863658000 | 4.096073000  |
| H | 13.479017000 | 24.806068000 | 2.884554000  |
| H | 13.275726000 | 25.762779000 | 4.365149000  |
| C | 17.443207000 | 23.447003000 | 5.903431000  |
| C | 17.966776000 | 23.405409000 | 7.335158000  |
| H | 17.796776000 | 24.361507000 | 7.838063000  |
| H | 17.477441000 | 22.620392000 | 7.918093000  |
| H | 19.041660000 | 23.197745000 | 7.340166000  |
| C | 18.143795000 | 24.552381000 | 5.118008000  |
| H | 17.759597000 | 24.594147000 | 4.093563000  |
| H | 17.970325000 | 25.525304000 | 5.589065000  |
| H | 19.223414000 | 24.375717000 | 5.074221000  |

|   |              |              |              |
|---|--------------|--------------|--------------|
| C | 17.648721000 | 22.100363000 | 5.220384000  |
| H | 17.147390000 | 21.300271000 | 5.767035000  |
| H | 17.242842000 | 22.131361000 | 4.204899000  |
| H | 18.711319000 | 21.851028000 | 5.157161000  |
| C | 14.520724000 | 25.167166000 | 8.759234000  |
| C | 13.012043000 | 25.271109000 | 8.969040000  |
| H | 12.728584000 | 26.269724000 | 9.319672000  |
| H | 12.493132000 | 25.064911000 | 8.029913000  |
| H | 12.686332000 | 24.538765000 | 9.713353000  |
| C | 15.262403000 | 25.373515000 | 10.075680000 |
| H | 14.939902000 | 24.628461000 | 10.807934000 |
| H | 16.340744000 | 25.260671000 | 9.926904000  |
| H | 15.069084000 | 26.370436000 | 10.485495000 |
| C | 14.988241000 | 26.186371000 | 7.722126000  |
| H | 14.780536000 | 27.202966000 | 8.072758000  |
| H | 16.062777000 | 26.094484000 | 7.543947000  |
| H | 14.469193000 | 26.038058000 | 6.771550000  |
| C | 15.226102000 | 21.334276000 | 12.639454000 |
| C | 14.261218000 | 21.467182000 | 11.460199000 |
| H | 14.766048000 | 21.911381000 | 10.595936000 |
| H | 13.864131000 | 20.486792000 | 11.178199000 |
| H | 13.420421000 | 22.117380000 | 11.721481000 |
| C | 15.877655000 | 22.680895000 | 12.941101000 |
| H | 16.399841000 | 23.061953000 | 12.060843000 |
| H | 15.116781000 | 23.412654000 | 13.233191000 |
| H | 16.604030000 | 22.587691000 | 13.753203000 |
| C | 14.488392000 | 20.814370000 | 13.869311000 |
| H | 14.033528000 | 19.843569000 | 13.654592000 |
| H | 15.184677000 | 20.690608000 | 14.705173000 |
| H | 13.699481000 | 21.508369000 | 14.175711000 |
| C | 18.260852000 | 17.905955000 | 12.206782000 |
| C | 16.948505000 | 17.138690000 | 12.352087000 |
| H | 17.023151000 | 16.369364000 | 13.128335000 |
| H | 16.141693000 | 17.828869000 | 12.611671000 |
| H | 16.690324000 | 16.658178000 | 11.405001000 |
| C | 18.649030000 | 18.576467000 | 13.523504000 |
| H | 18.822171000 | 17.821432000 | 14.298037000 |
| H | 19.564122000 | 19.162502000 | 13.400393000 |
| H | 17.854424000 | 19.245168000 | 13.864900000 |
| C | 19.379211000 | 16.974698000 | 11.747766000 |
| H | 20.316011000 | 17.529603000 | 11.632533000 |
| H | 19.540280000 | 16.170045000 | 12.473114000 |
| H | 19.126497000 | 16.526084000 | 10.783611000 |
| C | 19.596444000 | 22.216080000 | 11.250392000 |
| C | 20.678742000 | 22.550122000 | 12.272665000 |
| H | 21.159071000 | 21.635203000 | 12.634461000 |
| H | 21.448663000 | 23.192163000 | 11.831587000 |
| H | 20.244061000 | 23.071625000 | 13.131483000 |
| C | 20.195671000 | 21.428538000 | 10.085194000 |
| H | 19.423041000 | 21.173681000 | 9.355449000  |
| H | 20.968004000 | 22.019708000 | 9.581337000  |
| H | 20.652053000 | 20.501884000 | 10.445841000 |
| C | 18.916849000 | 23.489707000 | 10.750162000 |
| H | 18.536281000 | 24.073161000 | 11.594546000 |
| H | 19.615905000 | 24.117053000 | 10.186781000 |
| H | 18.078806000 | 23.225425000 | 10.102269000 |

[<sup>Si</sup>L<sub>3</sub>USU<sup>Si</sup>L<sub>3</sub>] E = -5635.16781290

|    |              |              |              |
|----|--------------|--------------|--------------|
| U  | 11.819725000 | 17.252536000 | 8.123002000  |
| Si | 9.433808000  | 19.356175000 | 10.043312000 |
| Si | 11.727902000 | 13.937666000 | 9.747519000  |
| Si | 10.016213000 | 16.909494000 | 5.079506000  |
| S  | 14.011361000 | 18.180553000 | 9.369428000  |

|   |              |              |              |
|---|--------------|--------------|--------------|
| O | 10.553694000 | 18.403507000 | 9.292978000  |
| O | 9.780120000  | 20.961288000 | 9.780300000  |
| O | 9.350673000  | 19.143450000 | 11.683389000 |
| O | 7.978705000  | 18.875027000 | 9.415810000  |
| O | 11.716810000 | 15.510223000 | 9.249798000  |
| O | 13.187340000 | 13.477255000 | 10.383747000 |
| O | 10.572164000 | 13.675587000 | 10.911164000 |
| O | 11.498490000 | 13.069408000 | 8.352781000  |
| O | 10.316026000 | 16.817001000 | 6.697473000  |
| O | 11.423707000 | 16.711122000 | 4.205831000  |
| O | 9.501222000  | 18.462141000 | 4.813985000  |
| O | 8.929353000  | 15.767031000 | 4.571041000  |
| C | 10.183468000 | 21.566214000 | 8.539250000  |
| C | 9.483503000  | 20.916134000 | 7.349285000  |
| H | 9.772274000  | 19.870597000 | 7.215341000  |
| H | 9.741179000  | 21.451379000 | 6.431584000  |
| H | 8.397877000  | 20.950465000 | 7.471547000  |
| C | 11.697700000 | 21.447512000 | 8.408687000  |
| H | 12.055846000 | 21.938019000 | 7.501029000  |
| H | 11.999935000 | 20.395362000 | 8.388663000  |
| H | 12.192902000 | 21.915101000 | 9.264589000  |
| C | 9.776482000  | 23.032098000 | 8.645699000  |
| H | 8.688883000  | 23.121701000 | 8.730995000  |
| H | 10.101987000 | 23.588415000 | 7.761609000  |
| H | 10.228774000 | 23.489616000 | 9.530382000  |
| C | 10.373074000 | 19.356152000 | 12.675767000 |
| C | 11.655206000 | 18.642210000 | 12.264631000 |
| H | 11.455316000 | 17.589560000 | 12.055694000 |
| H | 12.398032000 | 18.696463000 | 13.065602000 |
| H | 12.093473000 | 19.079335000 | 11.364544000 |
| C | 10.612278000 | 20.853204000 | 12.848859000 |
| H | 10.975617000 | 21.292769000 | 11.917883000 |
| H | 11.348351000 | 21.033441000 | 13.638373000 |
| H | 9.681101000  | 21.359402000 | 13.123495000 |
| C | 9.812536000  | 18.752857000 | 13.958793000 |
| H | 8.869567000  | 19.239014000 | 14.228609000 |
| H | 10.517537000 | 18.881540000 | 14.786165000 |
| H | 9.623455000  | 17.683643000 | 13.826500000 |
| C | 6.658754000  | 19.206126000 | 9.876288000  |
| C | 5.754859000  | 19.065220000 | 8.656114000  |
| H | 6.056877000  | 19.768762000 | 7.873891000  |
| H | 4.710843000  | 19.264835000 | 8.918185000  |
| H | 5.824155000  | 18.052706000 | 8.247915000  |
| C | 6.602586000  | 20.632113000 | 10.418443000 |
| H | 7.251395000  | 20.741253000 | 11.292367000 |
| H | 5.579986000  | 20.880769000 | 10.720327000 |
| H | 6.922359000  | 21.350175000 | 9.658414000  |
| C | 6.269044000  | 18.204819000 | 10.960332000 |
| H | 6.324325000  | 17.184646000 | 10.568357000 |
| H | 5.247126000  | 18.385116000 | 11.310866000 |
| H | 6.953406000  | 18.290196000 | 11.808258000 |
| C | 13.739180000 | 13.836023000 | 11.667225000 |
| C | 15.248921000 | 13.703757000 | 11.506064000 |
| H | 15.512398000 | 12.688689000 | 11.191798000 |
| H | 15.761904000 | 13.917303000 | 12.448585000 |
| H | 15.609853000 | 14.405691000 | 10.749045000 |
| C | 13.365703000 | 15.267052000 | 12.042098000 |
| H | 13.711546000 | 15.977445000 | 11.286320000 |
| H | 13.820662000 | 15.535747000 | 13.000810000 |
| H | 12.281526000 | 15.367420000 | 12.143780000 |
| C | 13.211122000 | 12.848684000 | 12.704109000 |
| H | 12.121430000 | 12.912847000 | 12.760801000 |
| H | 13.629070000 | 13.063784000 | 13.693208000 |

|   |              |              |              |
|---|--------------|--------------|--------------|
| H | 13.485415000 | 11.824420000 | 12.431327000 |
| C | 9.244792000  | 14.237655000 | 10.965898000 |
| C | 8.620974000  | 14.285923000 | 9.575203000  |
| H | 8.615204000  | 13.291743000 | 9.121077000  |
| H | 9.176947000  | 14.963268000 | 8.922428000  |
| H | 7.590163000  | 14.649439000 | 9.630788000  |
| C | 8.451203000  | 13.306779000 | 11.875604000 |
| H | 8.923297000  | 13.242457000 | 12.861009000 |
| H | 8.408015000  | 12.299056000 | 11.450415000 |
| H | 7.427685000  | 13.672295000 | 12.006138000 |
| C | 9.331246000  | 15.636610000 | 11.565069000 |
| H | 9.893476000  | 16.304903000 | 10.911031000 |
| H | 9.827735000  | 15.599298000 | 12.539487000 |
| H | 8.333789000  | 16.061824000 | 11.703890000 |
| C | 11.772639000 | 11.676647000 | 8.124778000  |
| C | 13.251325000 | 11.533075000 | 7.773089000  |
| H | 13.495192000 | 10.494468000 | 7.525646000  |
| H | 13.870527000 | 11.849160000 | 8.616186000  |
| H | 13.495614000 | 12.160379000 | 6.910025000  |
| C | 10.895995000 | 11.272030000 | 6.944308000  |
| H | 11.120871000 | 11.892750000 | 6.072227000  |
| H | 9.837821000  | 11.396712000 | 7.192432000  |
| H | 11.067365000 | 10.224457000 | 6.676761000  |
| C | 11.425906000 | 10.842626000 | 9.355381000  |
| H | 11.604315000 | 9.780915000  | 9.156532000  |
| H | 10.374240000 | 10.970584000 | 9.626518000  |
| H | 12.043372000 | 11.137314000 | 10.208757000 |
| C | 12.144330000 | 15.482425000 | 3.982538000  |
| C | 12.318682000 | 14.717921000 | 5.291089000  |
| H | 11.362776000 | 14.431614000 | 5.733341000  |
| H | 12.873099000 | 15.323639000 | 6.017226000  |
| H | 12.900744000 | 13.807216000 | 5.123854000  |
| C | 11.402142000 | 14.633839000 | 2.954713000  |
| H | 10.408745000 | 14.370042000 | 3.322302000  |
| H | 11.960252000 | 13.716023000 | 2.743219000  |
| H | 11.287623000 | 15.188368000 | 2.018022000  |
| C | 13.503581000 | 15.907792000 | 3.442680000  |
| H | 14.020076000 | 16.536349000 | 4.171612000  |
| H | 13.384655000 | 16.480230000 | 2.518005000  |
| H | 14.129232000 | 15.035287000 | 3.232902000  |
| C | 9.436860000  | 19.175335000 | 3.565649000  |
| C | 10.771747000 | 19.891563000 | 3.379449000  |
| H | 10.765508000 | 20.510877000 | 2.476740000  |
| H | 11.582349000 | 19.162041000 | 3.298066000  |
| H | 10.968617000 | 20.537144000 | 4.239451000  |
| C | 9.155690000  | 18.234476000 | 2.397075000  |
| H | 9.069004000  | 18.805548000 | 1.466937000  |
| H | 8.221568000  | 17.688568000 | 2.554924000  |
| H | 9.965937000  | 17.509989000 | 2.277157000  |
| C | 8.299818000  | 20.179226000 | 3.719891000  |
| H | 7.351048000  | 19.658781000 | 3.884017000  |
| H | 8.204923000  | 20.798014000 | 2.821930000  |
| H | 8.481994000  | 20.835206000 | 4.575423000  |
| C | 7.859816000  | 15.147828000 | 5.313737000  |
| C | 6.831029000  | 14.727021000 | 4.270082000  |
| H | 6.427141000  | 15.603684000 | 3.754035000  |
| H | 6.000875000  | 14.189677000 | 4.739512000  |
| H | 7.289838000  | 14.070203000 | 3.524327000  |
| C | 7.241398000  | 16.127213000 | 6.307525000  |
| H | 7.970646000  | 16.428341000 | 7.062342000  |
| H | 6.391181000  | 15.661032000 | 6.815428000  |
| H | 6.883517000  | 17.022551000 | 5.790030000  |
| C | 8.438282000  | 13.929906000 | 6.026012000  |



|    |              |              |              |
|----|--------------|--------------|--------------|
| H  | 8.866324000  | 13.235440000 | 5.296897000  |
| H  | 7.661752000  | 13.401118000 | 6.587952000  |
| H  | 9.223910000  | 14.229738000 | 6.722885000  |
| U  | 15.548062000 | 20.081413000 | 8.451381000  |
| Si | 17.779976000 | 18.126499000 | 6.241468000  |
| Si | 14.738813000 | 23.138455000 | 6.844989000  |
| Si | 17.453008000 | 20.414920000 | 11.341740000 |
| O  | 16.580245000 | 18.899921000 | 7.082707000  |
| O  | 17.493400000 | 16.495342000 | 6.153362000  |
| O  | 17.931589000 | 18.656853000 | 4.677277000  |
| O  | 19.165974000 | 18.533305000 | 7.049545000  |
| O  | 14.768777000 | 21.503850000 | 7.089604000  |
| O  | 13.334902000 | 23.646540000 | 6.122275000  |
| O  | 15.974673000 | 23.661300000 | 5.870144000  |
| O  | 14.800337000 | 23.751821000 | 8.387117000  |
| O  | 16.999756000 | 20.836484000 | 9.806202000  |
| O  | 16.165536000 | 20.415313000 | 12.390035000 |
| O  | 17.975972000 | 18.845844000 | 11.216601000 |
| O  | 18.610384000 | 21.428609000 | 11.961842000 |
| C  | 17.044463000 | 15.588602000 | 7.176588000  |
| C  | 17.504003000 | 16.038825000 | 8.557883000  |
| H  | 17.037300000 | 16.983605000 | 8.847133000  |
| H  | 17.228847000 | 15.288790000 | 9.304940000  |
| H  | 18.589394000 | 16.165908000 | 8.574689000  |
| C  | 15.523819000 | 15.520916000 | 7.096914000  |
| H  | 15.122835000 | 14.796843000 | 7.813051000  |
| H  | 15.098864000 | 16.500857000 | 7.334992000  |
| H  | 15.217909000 | 15.219166000 | 6.091394000  |
| C  | 17.656774000 | 14.235847000 | 6.829269000  |
| H  | 18.749451000 | 14.285817000 | 6.869673000  |
| H  | 17.318165000 | 13.469511000 | 7.533674000  |
| H  | 17.364224000 | 13.931030000 | 5.819505000  |
| C  | 16.996220000 | 18.517756000 | 3.589790000  |
| C  | 15.612503000 | 18.985872000 | 4.033842000  |
| H  | 15.656625000 | 20.009451000 | 4.411827000  |
| H  | 14.905389000 | 18.951505000 | 3.199485000  |
| H  | 15.226805000 | 18.348735000 | 4.834872000  |
| C  | 16.964506000 | 17.066128000 | 3.119695000  |
| H  | 16.626904000 | 16.405662000 | 3.919832000  |
| H  | 16.295545000 | 16.960157000 | 2.259723000  |
| H  | 17.966031000 | 16.745909000 | 2.814982000  |
| C  | 17.532160000 | 19.410704000 | 2.476054000  |
| H  | 18.542204000 | 19.097407000 | 2.193849000  |
| H  | 16.891708000 | 19.347733000 | 1.590723000  |
| H  | 17.574070000 | 20.453233000 | 2.800331000  |
| C  | 20.525568000 | 18.367837000 | 6.607462000  |
| C  | 21.361191000 | 18.273035000 | 7.878710000  |
| H  | 21.064582000 | 17.400780000 | 8.469437000  |
| H  | 22.425506000 | 18.184444000 | 7.638397000  |
| H  | 21.216362000 | 19.165518000 | 8.492932000  |
| C  | 20.683840000 | 17.101227000 | 5.770458000  |
| H  | 20.079536000 | 17.157089000 | 4.860235000  |
| H  | 21.730437000 | 16.971731000 | 5.476653000  |
| H  | 20.374420000 | 16.219590000 | 6.338366000  |
| C  | 20.907210000 | 19.603519000 | 5.797342000  |
| H  | 20.775266000 | 20.504971000 | 6.403996000  |
| H  | 21.953084000 | 19.553437000 | 5.476507000  |
| H  | 20.270255000 | 19.681550000 | 4.912334000  |
| C  | 13.001736000 | 23.533881000 | 4.721874000  |
| C  | 11.479389000 | 23.555145000 | 4.666589000  |
| H  | 11.094834000 | 24.476487000 | 5.114597000  |
| H  | 11.126160000 | 23.498721000 | 3.632494000  |
| H  | 11.067974000 | 22.706192000 | 5.218455000  |

|   |              |              |              |
|---|--------------|--------------|--------------|
| C | 13.543195000 | 22.227909000 | 4.145467000  |
| H | 13.181471000 | 21.372925000 | 4.722084000  |
| H | 13.220692000 | 22.106051000 | 3.107073000  |
| H | 14.636388000 | 22.222903000 | 4.164779000  |
| C | 13.587561000 | 24.735243000 | 3.986592000  |
| H | 14.674747000 | 24.747178000 | 4.094078000  |
| H | 13.337651000 | 24.695148000 | 2.921113000  |
| H | 13.184832000 | 25.666541000 | 4.397464000  |
| C | 17.383540000 | 23.374975000 | 5.927367000  |
| C | 17.892827000 | 23.389956000 | 7.362923000  |
| H | 17.690640000 | 24.351312000 | 7.841249000  |
| H | 17.427020000 | 22.605941000 | 7.966049000  |
| H | 18.972726000 | 23.214184000 | 7.378550000  |
| C | 18.050588000 | 24.483056000 | 5.119514000  |
| H | 17.674377000 | 24.484945000 | 4.091751000  |
| H | 17.839917000 | 25.460184000 | 5.564958000  |
| H | 19.135363000 | 24.341148000 | 5.089977000  |
| C | 17.636005000 | 22.019399000 | 5.282316000  |
| H | 17.171845000 | 21.210584000 | 5.849497000  |
| H | 17.223192000 | 22.007614000 | 4.270507000  |
| H | 18.707299000 | 21.810616000 | 5.220162000  |
| C | 14.509261000 | 25.099467000 | 8.809490000  |
| C | 13.008740000 | 25.191427000 | 9.067939000  |
| H | 12.735722000 | 26.185762000 | 9.436746000  |
| H | 12.455752000 | 24.994675000 | 8.146183000  |
| H | 12.709957000 | 24.452612000 | 9.817324000  |
| C | 15.297445000 | 25.303596000 | 10.096852000 |
| H | 14.995642000 | 24.567579000 | 10.845784000 |
| H | 16.369536000 | 25.186797000 | 9.911693000  |
| H | 15.122850000 | 26.303980000 | 10.505276000 |
| C | 14.940827000 | 26.113041000 | 7.753657000  |
| H | 14.743165000 | 27.129537000 | 8.108444000  |
| H | 16.009682000 | 26.023937000 | 7.542193000  |
| H | 14.389387000 | 25.966122000 | 6.820725000  |
| C | 15.219664000 | 21.458158000 | 12.679233000 |
| C | 14.250931000 | 21.597734000 | 11.504384000 |
| H | 14.755002000 | 22.033937000 | 10.634469000 |
| H | 13.840213000 | 20.618594000 | 11.236559000 |
| H | 13.418406000 | 22.259356000 | 11.760667000 |
| C | 15.930385000 | 22.779043000 | 12.949940000 |
| H | 16.458530000 | 23.128283000 | 12.060297000 |
| H | 15.202284000 | 23.543941000 | 13.238859000 |
| H | 16.658876000 | 22.667974000 | 13.757474000 |
| C | 14.480281000 | 20.988763000 | 13.926650000 |
| H | 13.999067000 | 20.024942000 | 13.742598000 |
| H | 15.180819000 | 20.869970000 | 14.759095000 |
| H | 13.713575000 | 21.712153000 | 14.219781000 |
| C | 18.114660000 | 17.875240000 | 12.272453000 |
| C | 16.783642000 | 17.140519000 | 12.402578000 |
| H | 16.836540000 | 16.370735000 | 13.179372000 |
| H | 15.988761000 | 17.846060000 | 12.657436000 |
| H | 16.523342000 | 16.663200000 | 11.454710000 |
| C | 18.504103000 | 18.542414000 | 13.589193000 |
| H | 18.658771000 | 17.784753000 | 14.364273000 |
| H | 19.431796000 | 19.110084000 | 13.473476000 |
| H | 17.718659000 | 19.22889000  | 13.929248000 |
| C | 19.220281000 | 16.928115000 | 11.820019000 |
| H | 20.167233000 | 17.467671000 | 11.717697000 |
| H | 19.359025000 | 16.119640000 | 12.545100000 |
| H | 18.970944000 | 16.486339000 | 10.852379000 |
| C | 19.608815000 | 22.177316000 | 11.244417000 |
| C | 20.701433000 | 22.483501000 | 12.262398000 |
| H | 21.158889000 | 21.557472000 | 12.624632000 |

|   |              |              |              |
|---|--------------|--------------|--------------|
| H | 21.484996000 | 23.103301000 | 11.814793000 |
| H | 20.283407000 | 23.019360000 | 13.120185000 |
| C | 20.174203000 | 21.358817000 | 10.086490000 |
| H | 19.395174000 | 21.129401000 | 9.355246000  |
| H | 20.969643000 | 21.913645000 | 9.578345000  |
| H | 20.593369000 | 20.418299000 | 10.455361000 |
| C | 18.961813000 | 23.464879000 | 10.741209000 |
| H | 18.604604000 | 24.065539000 | 11.583070000 |
| H | 19.676362000 | 24.065611000 | 10.169278000 |
| H | 18.112209000 | 23.226473000 | 10.097986000 |

$[\text{ArL}_3\text{UO}(\text{ArL}_3)]^{2-}$  E = -4757.59421105

|   |              |              |              |
|---|--------------|--------------|--------------|
| U | 6.889053000  | 9.491593000  | 8.822621000  |
| O | 7.411566000  | 7.657233000  | 7.588705000  |
| O | 7.482750000  | 11.591713000 | 9.476111000  |
| O | 7.500085000  | 8.545337000  | 10.742803000 |
| O | 4.831868000  | 9.740485000  | 8.353382000  |
| C | 7.617749000  | 12.877950000 | 9.745035000  |
| C | 7.603490000  | 6.648155000  | 6.758252000  |
| C | 7.084289000  | 5.346746000  | 7.060556000  |
| C | 5.082598000  | 11.961793000 | 11.406231000 |
| H | 4.614179000  | 11.289707000 | 12.131749000 |
| H | 5.261761000  | 11.401920000 | 10.486807000 |
| H | 4.366835000  | 12.754911000 | 11.176765000 |
| C | 7.059356000  | 13.436121000 | 10.940840000 |
| C | 9.257017000  | 7.752311000  | 12.139510000 |
| C | 6.358952000  | 5.053659000  | 8.380729000  |
| C | 8.319059000  | 6.848492000  | 5.534206000  |
| C | 8.312936000  | 13.736206000 | 8.834009000  |
| C | 8.436976000  | 5.783917000  | 4.637654000  |
| H | 8.963266000  | 5.930166000  | 3.700786000  |
| C | 10.028477000 | 12.099335000 | 7.982543000  |
| H | 10.784537000 | 12.519141000 | 8.655678000  |
| H | 10.544645000 | 11.715724000 | 7.095173000  |
| H | 9.548200000  | 11.265991000 | 8.495955000  |
| C | 7.235574000  | 4.330705000  | 6.113472000  |
| H | 6.827735000  | 3.347413000  | 6.319376000  |
| C | 9.005776000  | 13.176558000 | 7.585142000  |
| C | 7.860323000  | 7.937942000  | 11.860824000 |
| C | 7.317962000  | 11.449898000 | 12.468109000 |
| H | 8.250325000  | 11.879460000 | 12.852723000 |
| H | 7.560840000  | 10.756559000 | 11.666616000 |
| H | 6.854711000  | 10.878278000 | 13.280001000 |
| C | 7.962085000  | 12.595946000 | 6.621635000  |
| H | 7.377819000  | 11.805054000 | 7.094719000  |
| H | 8.448961000  | 12.184853000 | 5.730377000  |
| H | 7.262108000  | 13.372151000 | 6.298797000  |
| C | 8.342200000  | 15.109118000 | 9.088342000  |
| H | 8.845097000  | 15.770902000 | 8.391587000  |
| C | 7.276903000  | 5.377761000  | 9.569187000  |
| H | 8.217250000  | 4.819593000  | 9.494850000  |
| H | 6.794956000  | 5.091990000  | 10.510806000 |
| H | 7.507140000  | 6.439059000  | 9.618906000  |
| C | 6.368196000  | 12.559179000 | 11.990844000 |
| C | 10.227691000 | 7.520562000  | 9.815475000  |
| H | 11.005669000 | 7.880311000  | 9.131769000  |
| H | 9.259308000  | 7.677380000  | 9.339660000  |
| H | 10.366954000 | 6.441218000  | 9.940586000  |
| C | 11.758904000 | 7.951636000  | 11.693038000 |
| H | 11.942706000 | 6.879385000  | 11.822200000 |
| H | 11.960437000 | 8.452245000  | 12.646533000 |
| H | 12.490267000 | 8.322731000  | 10.966509000 |
| C | 5.957917000  | 3.576895000  | 8.510147000  |

|   |              |              |              |
|---|--------------|--------------|--------------|
| H | 5.247898000  | 3.271954000  | 7.733587000  |
| H | 5.462192000  | 3.429164000  | 9.476122000  |
| H | 6.822104000  | 2.903229000  | 8.477941000  |
| C | 5.058146000  | 5.862784000  | 8.463516000  |
| H | 5.230874000  | 6.933210000  | 8.345232000  |
| H | 4.568921000  | 5.697420000  | 9.429027000  |
| H | 4.363758000  | 5.547408000  | 7.681167000  |
| C | 10.344200000 | 8.241235000  | 11.168310000 |
| C | 6.890558000  | 7.463110000  | 12.793270000 |
| C | 5.357901000  | 7.582740000  | 12.662417000 |
| C | 9.628141000  | 7.109983000  | 13.320701000 |
| H | 10.678789000 | 6.962786000  | 13.543444000 |
| C | 4.840800000  | 8.233533000  | 11.380334000 |
| H | 5.171101000  | 9.266118000  | 11.283161000 |
| H | 3.748108000  | 8.239738000  | 11.410581000 |
| H | 5.138348000  | 7.681017000  | 10.489822000 |
| C | 7.126582000  | 14.818411000 | 11.129953000 |
| H | 6.681731000  | 15.255750000 | 12.016665000 |
| C | 7.893815000  | 4.532903000  | 4.905135000  |
| H | 7.991709000  | 3.722479000  | 4.187382000  |
| C | 9.776103000  | 14.254518000 | 6.810936000  |
| H | 9.116924000  | 15.037417000 | 6.420876000  |
| H | 10.275191000 | 13.791316000 | 5.952361000  |
| H | 10.548587000 | 14.728857000 | 7.426198000  |
| C | 4.727607000  | 6.178694000  | 12.725375000 |
| H | 5.057737000  | 5.567411000  | 11.879670000 |
| H | 3.635018000  | 6.256648000  | 12.677382000 |
| H | 4.981398000  | 5.643207000  | 13.645295000 |
| C | 5.948477000  | 13.358510000 | 13.232797000 |
| H | 5.205902000  | 14.128239000 | 12.996890000 |
| H | 6.801221000  | 13.835403000 | 13.729822000 |
| H | 5.486616000  | 12.674633000 | 13.953642000 |
| C | 10.256493000 | 9.763050000  | 10.970201000 |
| H | 11.054509000 | 10.099389000 | 10.297802000 |
| H | 10.381247000 | 10.284889000 | 11.925415000 |
| H | 9.301647000  | 10.071061000 | 10.545297000 |
| C | 9.712538000  | 8.184210000  | 3.865077000  |
| H | 10.553062000 | 7.483085000  | 3.912026000  |
| H | 10.123081000 | 9.181711000  | 3.672208000  |
| H | 9.088993000  | 7.917775000  | 3.005132000  |
| C | 8.687534000  | 6.646957000  | 14.236396000 |
| H | 9.003349000  | 6.151980000  | 15.151086000 |
| C | 8.912693000  | 8.216623000  | 5.174913000  |
| C | 7.742147000  | 15.663628000 | 10.212828000 |
| H | 7.771346000  | 16.736736000 | 10.383078000 |
| C | 4.820296000  | 8.421439000  | 13.837325000 |
| H | 5.071957000  | 7.985840000  | 14.809395000 |
| H | 3.728190000  | 8.499122000  | 13.778969000 |
| H | 5.231640000  | 9.435394000  | 13.807527000 |
| C | 7.342448000  | 6.832012000  | 13.959806000 |
| H | 6.610141000  | 6.473530000  | 14.678382000 |
| C | 9.880073000  | 8.701337000  | 6.266607000  |
| H | 10.698717000 | 7.985567000  | 6.400550000  |
| H | 9.380436000  | 8.817524000  | 7.228972000  |
| H | 10.317191000 | 9.664686000  | 5.981755000  |
| C | 7.775888000  | 9.228918000  | 4.975520000  |
| H | 8.178960000  | 10.227512000 | 4.776516000  |
| H | 7.125423000  | 9.282475000  | 5.850461000  |
| H | 7.153753000  | 8.940353000  | 4.123244000  |
| U | 2.774692000  | 9.989177000  | 7.884156000  |
| O | 2.251728000  | 11.823146000 | 9.118472000  |
| O | 2.180439000  | 7.889176000  | 7.230776000  |
| O | 2.163445000  | 10.935578000 | 5.964091000  |

|   |              |              |              |
|---|--------------|--------------|--------------|
| C | 2.045605000  | 6.602879000  | 6.961956000  |
| C | 2.059861000  | 12.832347000 | 9.948805000  |
| C | 2.579103000  | 14.133722000 | 9.646410000  |
| C | 4.580912000  | 7.518979000  | 5.300886000  |
| H | 5.049289000  | 8.191076000  | 4.575355000  |
| H | 4.401701000  | 8.078871000  | 6.220289000  |
| H | 5.296727000  | 6.725911000  | 5.530391000  |
| C | 2.604165000  | 6.044629000  | 5.766270000  |
| C | 0.406477000  | 11.728915000 | 4.567600000  |
| C | 3.304419000  | 14.426773000 | 8.326218000  |
| C | 1.344360000  | 12.632151000 | 11.172920000 |
| C | 1.350432000  | 5.744647000  | 7.873009000  |
| C | 1.226597000  | 13.696778000 | 12.069430000 |
| H | 0.700375000  | 13.550601000 | 13.006344000 |
| C | -0.365140000 | 7.381550000  | 8.724338000  |
| H | -1.121272000 | 6.961730000  | 8.051284000  |
| H | -0.881238000 | 7.765262000  | 9.611703000  |
| H | 0.115167000  | 8.214832000  | 8.210845000  |
| C | 2.427974000  | 15.149820000 | 10.593464000 |
| H | 2.835892000  | 16.133058000 | 10.387471000 |
| C | 0.657509000  | 6.304323000  | 9.121802000  |
| C | 1.803179000  | 11.543266000 | 4.846240000  |
| C | 2.345614000  | 8.030736000  | 4.238851000  |
| H | 1.413161000  | 7.601151000  | 3.854482000  |
| H | 2.102896000  | 8.724281000  | 5.040215000  |
| H | 2.808779000  | 8.602132000  | 3.426755000  |
| C | 1.701162000  | 6.884923000  | 10.085357000 |
| H | 2.285472000  | 7.675806000  | 9.612305000  |
| H | 1.214248000  | 7.296041000  | 10.976579000 |
| H | 2.401120000  | 6.108714000  | 10.408227000 |
| C | 1.321228000  | 4.371719000  | 7.618762000  |
| H | 0.818307000  | 3.709960000  | 8.315521000  |
| C | 2.386527000  | 14.102473000 | 7.137773000  |
| H | 1.446174000  | 14.660646000 | 7.212010000  |
| H | 2.868490000  | 14.388112000 | 6.196124000  |
| H | 2.156303000  | 13.041173000 | 7.088196000  |
| C | 3.295368000  | 6.921505000  | 4.716244000  |
| C | -0.564439000 | 11.959763000 | 6.891675000  |
| H | -1.342482000 | 11.599687000 | 7.575133000  |
| H | 0.403894000  | 11.802841000 | 7.367550000  |
| H | -0.703795000 | 13.039137000 | 6.766945000  |
| C | -2.095410000 | 11.529172000 | 5.013800000  |
| H | -2.279262000 | 12.601437000 | 4.884827000  |
| H | -2.296858000 | 11.028735000 | 4.060196000  |
| H | -2.826797000 | 11.157900000 | 5.740212000  |
| C | 3.705255000  | 15.903584000 | 8.196651000  |
| H | 4.415251000  | 16.208720000 | 8.973156000  |
| H | 4.200927000  | 16.051291000 | 7.230647000  |
| H | 2.840959000  | 16.577112000 | 8.228818000  |
| C | 4.605334000  | 13.617811000 | 8.243570000  |
| H | 4.432736000  | 12.547363000 | 8.361881000  |
| H | 5.094620000  | 13.783198000 | 7.278091000  |
| H | 5.299607000  | 13.933336000 | 9.025964000  |
| C | -0.680726000 | 11.239555000 | 5.538573000  |
| C | 2.772919000  | 12.018295000 | 3.913869000  |
| C | 4.305571000  | 11.898412000 | 4.044541000  |
| C | 0.035328000  | 12.371595000 | 3.386606000  |
| H | -1.015328000 | 12.518829000 | 3.163928000  |
| C | 4.822676000  | 11.247324000 | 5.326466000  |
| H | 4.492203000  | 10.214775000 | 5.423515000  |
| H | 5.915366000  | 11.240913000 | 5.296118000  |
| H | 4.525349000  | 11.799775000 | 6.217093000  |
| C | 2.536988000  | 4.662323000  | 5.577228000  |

|   |              |              |              |
|---|--------------|--------------|--------------|
| H | 2.981902000  | 4.224955000  | 4.690564000  |
| C | 1.769821000  | 14.947742000 | 11.801862000 |
| H | 1.672070000  | 15.758195000 | 12.519601000 |
| C | -0.112888000 | 5.226401000  | 9.895994000  |
| H | 0.546256000  | 4.443560000  | 10.286230000 |
| H | -0.612111000 | 5.689679000  | 10.754452000 |
| H | -0.885265000 | 4.751990000  | 9.280657000  |
| C | 4.936143000  | 13.302340000 | 3.981743000  |
| H | 4.606230000  | 13.913559000 | 4.827578000  |
| H | 6.028721000  | 13.224129000 | 4.029633000  |
| H | 4.682408000  | 13.838037000 | 3.061933000  |
| C | 3.715206000  | 6.122106000  | 3.474374000  |
| H | 4.457743000  | 5.352374000  | 3.710387000  |
| H | 2.862502000  | 5.645211000  | 2.977283000  |
| H | 4.177157000  | 6.805942000  | 2.753549000  |
| C | -0.592858000 | 9.717681000  | 5.736175000  |
| H | -1.390992000 | 9.380995000  | 6.408258000  |
| H | -0.717331000 | 9.196169000  | 4.780744000  |
| H | 0.361936000  | 9.409658000  | 6.161181000  |
| C | -0.049214000 | 11.296733000 | 12.842229000 |
| H | -0.889630000 | 11.997987000 | 12.795213000 |
| H | -0.459912000 | 10.299305000 | 13.035147000 |
| H | 0.574342000  | 11.563117000 | 13.702178000 |
| C | 0.975914000  | 12.834895000 | 2.471028000  |
| H | 0.660090000  | 13.330146000 | 1.556491000  |
| C | 0.750624000  | 11.264111000 | 11.532386000 |
| C | 1.921360000  | 3.817149000  | 6.494346000  |
| H | 1.892203000  | 2.744029000  | 6.324175000  |
| C | 4.842880000  | 11.059792000 | 2.869436000  |
| H | 4.591160000  | 11.495593000 | 1.897470000  |
| H | 5.934983000  | 10.981901000 | 2.927633000  |
| H | 4.431355000  | 10.045909000 | 2.899135000  |
| C | 2.321004000  | 12.649716000 | 2.747520000  |
| H | 3.053293000  | 13.008350000 | 2.029001000  |
| C | -0.216821000 | 10.779414000 | 10.440742000 |
| H | -1.035216000 | 11.495420000 | 10.306549000 |
| H | 0.282883000  | 10.662825000 | 9.478463000  |
| H | -0.654292000 | 9.816290000  | 10.725801000 |
| C | 1.887354000  | 10.251759000 | 11.731865000 |
| H | 1.484215000  | 9.253213000  | 11.930998000 |
| H | 2.537793000  | 10.198043000 | 10.856919000 |
| H | 2.509527000  | 10.540389000 | 12.584095000 |

[<sup>Ar</sup>L<sub>3</sub>UO<sup>Ar</sup>L<sub>3</sub>]<sup>1-</sup> E = -4757.53528917

|   |             |              |              |
|---|-------------|--------------|--------------|
| U | 6.955528000 | 9.491259000  | 8.826826000  |
| O | 7.375709000 | 7.677985000  | 7.663096000  |
| O | 7.383823000 | 11.525273000 | 9.509688000  |
| O | 7.553468000 | 8.571354000  | 10.673479000 |
| O | 5.042411000 | 9.747720000  | 8.290058000  |
| C | 7.606507000 | 12.815441000 | 9.795663000  |
| C | 7.533125000 | 6.661245000  | 6.804389000  |
| C | 6.981349000 | 5.381146000  | 7.105389000  |
| C | 5.070402000 | 11.973089000 | 11.477754000 |
| H | 4.586595000 | 11.308327000 | 12.198563000 |
| H | 5.220706000 | 11.424842000 | 10.547423000 |
| H | 4.379023000 | 12.791633000 | 11.263919000 |
| C | 7.103448000 | 13.372371000 | 11.008420000 |
| C | 9.286601000 | 7.879432000  | 12.147967000 |
| C | 6.278539000 | 5.089572000  | 8.435006000  |
| C | 8.234002000 | 6.865300000  | 5.580359000  |
| C | 8.326994000 | 13.632780000 | 8.877848000  |
| C | 8.293477000 | 5.814123000  | 4.661866000  |
| H | 8.806627000 | 5.958417000  | 3.718444000  |

|   |              |              |              |
|---|--------------|--------------|--------------|
| C | 9.840961000  | 11.887286000 | 7.835567000  |
| H | 10.613663000 | 12.154159000 | 8.563247000  |
| H | 10.336583000 | 11.585965000 | 6.907639000  |
| H | 9.312591000  | 11.018134000 | 8.229434000  |
| C | 7.072726000  | 4.377273000  | 6.137622000  |
| H | 6.634685000  | 3.406580000  | 6.336744000  |
| C | 8.907440000  | 13.077357000 | 7.571307000  |
| C | 7.898119000  | 8.023480000  | 11.847206000 |
| C | 7.304247000  | 11.390151000 | 12.532382000 |
| H | 8.243207000  | 11.798801000 | 12.921957000 |
| H | 7.541688000  | 10.697203000 | 11.729647000 |
| H | 6.829581000  | 10.823944000 | 13.339913000 |
| C | 7.760656000  | 12.670158000 | 6.638159000  |
| H | 7.081709000  | 11.959651000 | 7.113087000  |
| H | 8.150388000  | 12.223406000 | 5.718288000  |
| H | 7.165067000  | 13.543972000 | 6.360866000  |
| C | 8.467411000  | 14.993016000 | 9.167793000  |
| H | 9.000782000  | 15.634450000 | 8.476482000  |
| C | 7.231105000  | 5.379964000  | 9.604943000  |
| H | 8.153492000  | 4.797832000  | 9.500381000  |
| H | 6.766316000  | 5.095119000  | 10.554307000 |
| H | 7.496221000  | 6.432149000  | 9.662776000  |
| C | 6.380423000  | 12.521928000 | 12.057967000 |
| C | 10.281119000 | 7.532223000  | 9.851535000  |
| H | 11.055494000 | 7.867216000  | 9.152547000  |
| H | 9.311814000  | 7.633917000  | 9.363629000  |
| H | 10.438336000 | 6.464364000  | 10.036491000 |
| C | 11.789781000 | 8.070301000  | 11.717886000 |
| H | 11.973469000 | 7.007157000  | 11.905033000 |
| H | 11.978100000 | 8.622324000  | 12.644720000 |
| H | 12.526861000 | 8.405398000  | 10.980192000 |
| C | 5.850701000  | 3.620016000  | 8.560481000  |
| H | 5.116988000  | 3.337238000  | 7.798329000  |
| H | 5.374061000  | 3.474978000  | 9.536145000  |
| H | 6.700481000  | 2.930406000  | 8.503641000  |
| C | 4.992291000  | 5.919456000  | 8.526363000  |
| H | 5.170880000  | 6.986377000  | 8.388945000  |
| H | 4.507678000  | 5.769813000  | 9.495891000  |
| H | 4.292550000  | 5.603926000  | 7.750410000  |
| C | 10.379935000 | 8.325784000  | 11.164952000 |
| C | 6.908850000  | 7.596687000  | 12.771103000 |
| C | 5.379349000  | 7.680126000  | 12.595836000 |
| C | 9.643201000  | 7.313793000  | 13.372235000 |
| H | 10.690244000 | 7.196730000  | 13.624772000 |
| C | 4.894580000  | 8.303095000  | 11.287611000 |
| H | 5.197668000  | 9.345995000  | 11.198538000 |
| H | 3.802925000  | 8.288765000  | 11.274090000 |
| H | 5.229466000  | 7.732381000  | 10.422627000 |
| C | 7.274517000  | 14.741550000 | 11.227992000 |
| H | 6.878442000  | 15.187951000 | 12.132338000 |
| C | 7.705956000  | 4.582524000  | 4.918209000  |
| H | 7.755498000  | 3.784687000  | 4.182197000  |
| C | 9.748226000  | 14.118412000 | 6.816765000  |
| H | 9.158326000  | 14.988902000 | 6.513344000  |
| H | 10.144079000 | 13.661837000 | 5.903211000  |
| H | 10.600482000 | 14.467085000 | 7.409871000  |
| C | 4.780825000  | 6.263039000  | 12.663232000 |
| H | 5.143197000  | 5.645245000  | 11.836782000 |
| H | 3.688510000  | 6.316497000  | 12.591278000 |
| H | 5.027598000  | 5.751813000  | 13.598302000 |
| C | 5.992672000  | 13.334919000 | 13.300766000 |
| H | 5.290346000  | 14.140910000 | 13.063547000 |
| H | 6.864100000  | 13.766241000 | 13.805944000 |

|   |              |              |              |
|---|--------------|--------------|--------------|
| H | 5.494339000  | 12.669778000 | 14.014209000 |
| C | 10.288832000 | 9.836879000  | 10.897699000 |
| H | 11.068773000 | 10.138867000 | 10.189856000 |
| H | 10.439570000 | 10.401496000 | 11.823539000 |
| H | 9.324403000  | 10.141875000 | 10.491570000 |
| C | 9.675215000  | 8.159480000  | 3.919740000  |
| H | 10.471126000 | 7.407560000  | 3.933038000  |
| H | 10.143185000 | 9.135038000  | 3.748538000  |
| H | 9.021391000  | 7.956739000  | 3.065445000  |
| C | 8.687199000  | 6.890713000  | 14.289988000 |
| H | 8.990049000  | 6.453375000  | 15.237417000 |
| C | 8.901641000  | 8.203131000  | 5.245132000  |
| C | 7.937551000  | 15.557223000 | 10.320033000 |
| H | 8.052278000  | 16.619799000 | 10.515990000 |
| C | 4.781353000  | 8.515711000  | 13.742698000 |
| H | 5.001719000  | 8.088879000  | 14.725383000 |
| H | 3.692044000  | 8.564926000  | 13.639083000 |
| H | 5.168489000  | 9.538399000  | 13.726173000 |
| C | 7.345688000  | 7.035764000  | 13.979429000 |
| H | 6.604948000  | 6.703609000  | 14.700780000 |
| C | 9.920922000  | 8.570930000  | 6.333309000  |
| H | 10.675318000 | 7.783363000  | 6.431496000  |
| H | 9.450908000  | 8.690322000  | 7.309572000  |
| H | 10.435882000 | 9.502310000  | 6.077663000  |
| C | 7.836302000  | 9.296171000  | 5.094011000  |
| H | 8.306944000  | 10.269782000 | 4.927161000  |
| H | 7.186907000  | 9.365594000  | 5.969182000  |
| H | 7.187918000  | 9.082033000  | 4.240043000  |
| U | 2.862468000  | 10.007246000 | 7.813821000  |
| O | 2.317921000  | 11.725694000 | 9.152480000  |
| O | 2.274439000  | 7.928011000  | 7.187551000  |
| O | 2.150492000  | 10.944894000 | 5.961085000  |
| C | 2.117408000  | 6.637397000  | 6.912972000  |
| C | 2.090067000  | 12.750979000 | 9.968380000  |
| C | 2.597426000  | 14.053671000 | 9.662284000  |
| C | 4.646198000  | 7.542090000  | 5.238662000  |
| H | 5.110562000  | 8.221119000  | 4.516975000  |
| H | 4.476103000  | 8.088078000  | 6.167856000  |
| H | 5.359432000  | 6.743956000  | 5.454680000  |
| C | 2.670116000  | 6.078878000  | 5.718091000  |
| C | 0.379100000  | 11.714392000 | 4.570347000  |
| C | 3.328835000  | 14.356439000 | 8.348738000  |
| C | 1.351829000  | 12.552778000 | 11.176285000 |
| C | 1.414904000  | 5.787890000  | 7.822661000  |
| C | 1.207863000  | 13.622408000 | 12.063381000 |
| H | 0.664529000  | 13.477541000 | 12.990165000 |
| C | -0.320292000 | 7.411803000  | 8.633436000  |
| H | -1.048015000 | 6.981556000  | 7.936748000  |
| H | -0.869029000 | 7.787098000  | 9.503878000  |
| H | 0.162048000  | 8.251772000  | 8.134733000  |
| C | 2.419946000  | 15.075423000 | 10.599306000 |
| H | 2.818345000  | 16.061650000 | 10.391311000 |
| C | 0.704274000  | 6.349143000  | 9.059751000  |
| C | 1.776906000  | 11.544065000 | 4.834799000  |
| C | 2.398317000  | 8.057129000  | 4.187482000  |
| H | 1.465289000  | 7.622223000  | 3.811944000  |
| H | 2.155258000  | 8.753033000  | 4.986630000  |
| H | 2.852586000  | 8.625973000  | 3.369084000  |
| C | 1.726788000  | 6.943294000  | 10.036719000 |
| H | 2.324805000  | 7.727017000  | 9.567503000  |
| H | 1.219824000  | 7.367672000  | 10.909372000 |
| H | 2.415787000  | 6.169663000  | 10.387916000 |
| C | 1.387159000  | 4.413644000  | 7.573845000  |



|   |              |              |              |
|---|--------------|--------------|--------------|
| H | 0.880968000  | 3.755314000  | 8.270732000  |
| C | 2.409140000  | 14.045117000 | 7.158833000  |
| H | 1.476869000  | 14.615717000 | 7.233780000  |
| H | 2.895086000  | 14.324403000 | 6.217730000  |
| H | 2.161837000  | 12.987911000 | 7.106037000  |
| C | 3.354282000  | 6.951741000  | 4.661224000  |
| C | -0.577005000 | 11.916727000 | 6.906580000  |
| H | -1.348458000 | 11.543082000 | 7.589692000  |
| H | 0.394459000  | 11.765390000 | 7.377078000  |
| H | -0.725338000 | 12.996014000 | 6.793872000  |
| C | -2.116042000 | 11.488454000 | 5.035305000  |
| H | -2.310572000 | 12.559722000 | 4.915043000  |
| H | -2.319257000 | 10.992351000 | 4.080106000  |
| H | -2.837940000 | 11.104674000 | 5.764445000  |
| C | 3.732952000  | 15.833424000 | 8.229120000  |
| H | 4.435174000  | 16.135080000 | 9.014022000  |
| H | 4.237878000  | 15.983195000 | 7.268318000  |
| H | 2.869648000  | 16.507787000 | 8.254188000  |
| C | 4.630909000  | 13.552133000 | 8.260402000  |
| H | 4.469849000  | 12.481065000 | 8.385852000  |
| H | 5.108588000  | 13.718048000 | 7.290434000  |
| H | 5.330846000  | 13.871776000 | 9.036041000  |
| C | -0.694657000 | 11.208984000 | 5.546915000  |
| C | 2.737829000  | 12.015671000 | 3.896158000  |
| C | 4.271813000  | 11.909616000 | 4.015800000  |
| C | -0.006244000 | 12.348953000 | 3.389486000  |
| H | -1.059426000 | 12.487039000 | 3.174547000  |
| C | 4.801602000  | 11.251366000 | 5.288528000  |
| H | 4.474578000  | 10.215682000 | 5.375986000  |
| H | 5.893360000  | 11.244753000 | 5.246638000  |
| H | 4.514282000  | 11.807426000 | 6.181672000  |
| C | 2.605860000  | 4.695560000  | 5.533803000  |
| H | 3.049594000  | 4.256164000  | 4.647918000  |
| C | 1.745700000  | 14.874981000 | 11.797731000 |
| H | 1.628005000  | 15.689357000 | 12.507688000 |
| C | -0.070182000 | 5.271469000  | 9.830387000  |
| H | 0.587324000  | 4.493247000  | 10.232221000 |
| H | -0.580566000 | 5.737925000  | 10.680263000 |
| H | -0.833850000 | 4.791731000  | 9.208820000  |
| C | 4.887148000  | 13.320509000 | 3.961970000  |
| H | 4.556662000  | 13.921634000 | 4.814696000  |
| H | 5.980644000  | 13.254399000 | 3.998572000  |
| H | 4.618723000  | 13.859436000 | 3.048762000  |
| C | 3.764103000  | 6.149609000  | 3.417968000  |
| H | 4.508066000  | 5.380088000  | 3.649398000  |
| H | 2.906893000  | 5.672341000  | 2.929810000  |
| H | 4.219710000  | 6.831894000  | 2.691810000  |
| C | -0.586425000 | 9.686318000  | 5.724457000  |
| H | -1.368279000 | 9.332420000  | 6.406149000  |
| H | -0.722366000 | 9.175932000  | 4.764834000  |
| H | 0.380071000  | 9.382063000  | 6.125233000  |
| C | -0.072990000 | 11.225420000 | 12.827483000 |
| H | -0.916884000 | 11.919611000 | 12.750826000 |
| H | -0.481698000 | 10.226849000 | 13.017903000 |
| H | 0.525014000  | 11.503927000 | 13.701455000 |
| C | 0.924743000  | 12.813733000 | 2.465409000  |
| H | 0.598417000  | 13.302751000 | 1.551443000  |
| C | 0.760275000  | 11.185781000 | 11.539199000 |
| C | 1.992413000  | 3.854712000  | 6.454990000  |
| H | 1.965231000  | 2.780870000  | 6.290369000  |
| C | 4.814935000  | 11.087250000 | 2.832092000  |
| H | 4.557531000  | 11.529919000 | 1.865276000  |
| H | 5.908167000  | 11.021933000 | 2.887749000  |

|   |              |              |              |
|---|--------------|--------------|--------------|
| H | 4.414832000  | 10.068821000 | 2.851519000  |
| C | 2.272907000  | 12.638396000 | 2.729745000  |
| H | 2.996585000  | 12.998207000 | 2.003709000  |
| C | -0.173164000 | 10.681447000 | 10.429029000 |
| H | -1.003033000 | 11.380279000 | 10.278321000 |
| H | 0.350983000  | 10.580789000 | 9.478786000  |
| H | -0.595916000 | 9.709440000  | 10.703581000 |
| C | 1.905924000  | 10.193670000 | 11.776022000 |
| H | 1.514850000  | 9.195069000  | 11.996769000 |
| H | 2.559227000  | 10.132412000 | 10.904177000 |
| H | 2.515581000  | 10.512561000 | 12.626220000 |

[<sup>Ar</sup>L<sub>3</sub>UOU<sup>Ar</sup>L<sub>3</sub>] E = -4757.44740174

|   |              |              |              |
|---|--------------|--------------|--------------|
| U | 6.962168000  | 9.439317000  | 8.906895000  |
| O | 7.441491000  | 7.704773000  | 7.715843000  |
| O | 7.378269000  | 11.471321000 | 9.496257000  |
| O | 7.674049000  | 8.573261000  | 10.703990000 |
| O | 4.933652000  | 9.702535000  | 8.387246000  |
| C | 7.692143000  | 12.751552000 | 9.791741000  |
| C | 7.587531000  | 6.677894000  | 6.850826000  |
| C | 7.015759000  | 5.409945000  | 7.152911000  |
| C | 5.155725000  | 12.019718000 | 11.513424000 |
| H | 4.668064000  | 11.361464000 | 12.237025000 |
| H | 5.265527000  | 11.480820000 | 10.572304000 |
| H | 4.487265000  | 12.863292000 | 11.326700000 |
| C | 7.243638000  | 13.326942000 | 11.013965000 |
| C | 9.406942000  | 7.901953000  | 12.190227000 |
| C | 6.341444000  | 5.110778000  | 8.494702000  |
| C | 8.286819000  | 6.879382000  | 5.628884000  |
| C | 8.449263000  | 13.522818000 | 8.867754000  |
| C | 8.299065000  | 5.839088000  | 4.695738000  |
| H | 8.806814000  | 5.978067000  | 3.749333000  |
| C | 9.836553000  | 11.707429000 | 7.784370000  |
| H | 10.679801000 | 11.950097000 | 8.438204000  |
| H | 10.237001000 | 11.340250000 | 6.835852000  |
| H | 9.292023000  | 10.890022000 | 8.262056000  |
| C | 7.061511000  | 4.416799000  | 6.170655000  |
| H | 6.603581000  | 3.455044000  | 6.366270000  |
| C | 8.961453000  | 12.944388000 | 7.545569000  |
| C | 8.019074000  | 8.032713000  | 11.890822000 |
| C | 7.381115000  | 11.356382000 | 12.546470000 |
| H | 8.329436000  | 11.736392000 | 12.941152000 |
| H | 7.606398000  | 10.660721000 | 11.742779000 |
| H | 6.889025000  | 10.799489000 | 13.349433000 |
| C | 7.763655000  | 12.613609000 | 6.648748000  |
| H | 7.067955000  | 11.925452000 | 7.133110000  |
| H | 8.096017000  | 12.172705000 | 5.705381000  |
| H | 7.205829000  | 13.524108000 | 6.417126000  |
| C | 8.690627000  | 14.866747000 | 9.167659000  |
| H | 9.256700000  | 15.474808000 | 8.472590000  |
| C | 7.319915000  | 5.391954000  | 9.644707000  |
| H | 8.236201000  | 4.806142000  | 9.514660000  |
| H | 6.876428000  | 5.102816000  | 10.602313000 |
| H | 7.596173000  | 6.440987000  | 9.705594000  |
| C | 6.493574000  | 12.517104000 | 12.074817000 |
| C | 10.407358000 | 7.530523000  | 9.903719000  |
| H | 11.181050000 | 7.859251000  | 9.201468000  |
| H | 9.438550000  | 7.624405000  | 9.414071000  |
| H | 10.567866000 | 6.465957000  | 10.103978000 |
| C | 11.910242000 | 8.099189000  | 11.766241000 |
| H | 12.098204000 | 7.039243000  | 11.965877000 |
| H | 12.093309000 | 8.663306000  | 12.686674000 |
| H | 12.647131000 | 8.429138000  | 11.026305000 |

|   |              |              |              |
|---|--------------|--------------|--------------|
| C | 5.919049000  | 3.639843000  | 8.622650000  |
| H | 5.166302000  | 3.358972000  | 7.879022000  |
| H | 5.469803000  | 3.488141000  | 9.610077000  |
| H | 6.769381000  | 2.954419000  | 8.538517000  |
| C | 5.054782000  | 5.935974000  | 8.609750000  |
| H | 5.220395000  | 7.002333000  | 8.448825000  |
| H | 4.594597000  | 5.798645000  | 9.592706000  |
| H | 4.339469000  | 5.606610000  | 7.853917000  |
| C | 10.501213000 | 8.342200000  | 11.205939000 |
| C | 7.029696000  | 7.610962000  | 12.813953000 |
| C | 5.500068000  | 7.682292000  | 12.640584000 |
| C | 9.764520000  | 7.348370000  | 13.419795000 |
| H | 10.811582000 | 7.239795000  | 13.674426000 |
| C | 5.012193000  | 8.307004000  | 11.335784000 |
| H | 5.307241000  | 9.354878000  | 11.256838000 |
| H | 3.921579000  | 8.286930000  | 11.320745000 |
| H | 5.342295000  | 7.729894000  | 10.472143000 |
| C | 7.513133000  | 14.678973000 | 11.243060000 |
| H | 7.164160000  | 15.141690000 | 12.158157000 |
| C | 7.674085000  | 4.624604000  | 4.942245000  |
| H | 7.686350000  | 3.837781000  | 4.193258000  |
| C | 9.835186000  | 13.939023000 | 6.767439000  |
| H | 9.283075000  | 14.839074000 | 6.479587000  |
| H | 10.180052000 | 13.460536000 | 5.844655000  |
| H | 10.721145000 | 14.241844000 | 7.335230000  |
| C | 4.913064000  | 6.260278000  | 12.701053000 |
| H | 5.284839000  | 5.646722000  | 11.876116000 |
| H | 3.820603000  | 6.304427000  | 12.625297000 |
| H | 5.160343000  | 5.751013000  | 13.636562000 |
| C | 6.153281000  | 13.351085000 | 13.317539000 |
| H | 5.492987000  | 14.192595000 | 13.083196000 |
| H | 7.047975000  | 13.736695000 | 13.817926000 |
| H | 5.625311000  | 12.712877000 | 14.034105000 |
| C | 10.404380000 | 9.849642000  | 10.921735000 |
| H | 11.188464000 | 10.146943000 | 10.216953000 |
| H | 10.544955000 | 10.424861000 | 11.842388000 |
| H | 9.442824000  | 10.142686000 | 10.501407000 |
| C | 9.783239000  | 8.114622000  | 3.976324000  |
| H | 10.527489000 | 7.311961000  | 3.961307000  |
| H | 10.313707000 | 9.059882000  | 3.820089000  |
| H | 9.105133000  | 7.975002000  | 3.128218000  |
| C | 8.809723000  | 6.926022000  | 14.338375000 |
| H | 9.114189000  | 6.497123000  | 15.288910000 |
| C | 9.034656000  | 8.180194000  | 5.315898000  |
| C | 8.219391000  | 15.453743000 | 10.333104000 |
| H | 8.412545000  | 16.503099000 | 10.537489000 |
| C | 4.890987000  | 8.508451000  | 13.788439000 |
| H | 5.117767000  | 8.083042000  | 14.769679000 |
| H | 3.801067000  | 8.540657000  | 13.685655000 |
| H | 5.262232000  | 9.536903000  | 13.774388000 |
| C | 7.468118000  | 7.059936000  | 14.026538000 |
| H | 6.728999000  | 6.727252000  | 14.748755000 |
| C | 10.091345000 | 8.433720000  | 6.400678000  |
| H | 10.763436000 | 7.573545000  | 6.482677000  |
| H | 9.642108000  | 8.590670000  | 7.380575000  |
| H | 10.696084000 | 9.311370000  | 6.152454000  |
| C | 8.058974000  | 9.358201000  | 5.204712000  |
| H | 8.602698000  | 10.278319000 | 4.973342000  |
| H | 7.488851000  | 9.521050000  | 6.123105000  |
| H | 7.334160000  | 9.183974000  | 4.404829000  |
| U | 2.921160000  | 10.007061000 | 7.810278000  |
| O | 2.464160000  | 11.683843000 | 9.090081000  |
| O | 2.405498000  | 8.013132000  | 7.172942000  |

|   |              |              |              |
|---|--------------|--------------|--------------|
| O | 2.152210000  | 10.894025000 | 6.044104000  |
| C | 2.243685000  | 6.700738000  | 6.892668000  |
| C | 2.212099000  | 12.710509000 | 9.933900000  |
| C | 2.695041000  | 14.014474000 | 9.628071000  |
| C | 4.807690000  | 7.578330000  | 5.234632000  |
| H | 5.287954000  | 8.254547000  | 4.521258000  |
| H | 4.656248000  | 8.113131000  | 6.173937000  |
| H | 5.500010000  | 6.761243000  | 5.441187000  |
| C | 2.814915000  | 6.151027000  | 5.710826000  |
| C | 0.415854000  | 11.729988000 | 4.651905000  |
| C | 3.410536000  | 14.337028000 | 8.314657000  |
| C | 1.487100000  | 12.478646000 | 11.135638000 |
| C | 1.524541000  | 5.869167000  | 7.795301000  |
| C | 1.323375000  | 13.542030000 | 12.028378000 |
| H | 0.786778000  | 13.380848000 | 12.955368000 |
| C | -0.237602000 | 7.485088000  | 8.542604000  |
| H | -0.927685000 | 7.046913000  | 7.814509000  |
| H | -0.828245000 | 7.852228000  | 9.387445000  |
| H | 0.244899000  | 8.336148000  | 8.062386000  |
| C | 2.500460000  | 15.028597000 | 10.569914000 |
| H | 2.877817000  | 16.022871000 | 10.364789000 |
| C | 0.778115000  | 6.431717000  | 9.008739000  |
| C | 1.804695000  | 11.547831000 | 4.915978000  |
| C | 2.556041000  | 8.117061000  | 4.168262000  |
| H | 1.632042000  | 7.677387000  | 3.777765000  |
| H | 2.288909000  | 8.812187000  | 4.959326000  |
| H | 3.019247000  | 8.687011000  | 3.357278000  |
| C | 1.772651000  | 7.016876000  | 10.017359000 |
| H | 2.399554000  | 7.793527000  | 9.574487000  |
| H | 1.242641000  | 7.445494000  | 10.872552000 |
| H | 2.444975000  | 6.238248000  | 10.388459000 |
| C | 1.501432000  | 4.493153000  | 7.552729000  |
| H | 0.981554000  | 3.839009000  | 8.241870000  |
| C | 2.466809000  | 14.036778000 | 7.141151000  |
| H | 1.551119000  | 14.631124000 | 7.229907000  |
| H | 2.939360000  | 14.296112000 | 6.189134000  |
| H | 2.183059000  | 12.988614000 | 7.101834000  |
| C | 3.507328000  | 7.013439000  | 4.652160000  |
| C | -0.583103000 | 11.764601000 | 6.979317000  |
| H | -1.336051000 | 11.308684000 | 7.631388000  |
| H | 0.393981000  | 11.631800000 | 7.442649000  |
| H | -0.778193000 | 12.841464000 | 6.943249000  |
| C | -2.083666000 | 11.458790000 | 5.054880000  |
| H | -2.282792000 | 12.534289000 | 5.001740000  |
| H | -2.266159000 | 11.023277000 | 4.066913000  |
| H | -2.814245000 | 11.024058000 | 5.745265000  |
| C | 3.803243000  | 15.817242000 | 8.203730000  |
| H | 4.508172000  | 16.117647000 | 8.986175000  |
| H | 4.299755000  | 15.976519000 | 7.240391000  |
| H | 2.935199000  | 16.484184000 | 8.238945000  |
| C | 4.719373000  | 13.544874000 | 8.218377000  |
| H | 4.579387000  | 12.472800000 | 8.358837000  |
| H | 5.186116000  | 13.708869000 | 7.244421000  |
| H | 5.422161000  | 13.878049000 | 8.985916000  |
| C | -0.669832000 | 11.153243000 | 5.571846000  |
| C | 2.788059000  | 12.046801000 | 4.025062000  |
| C | 4.317574000  | 11.900532000 | 4.145272000  |
| C | 0.051114000  | 12.437702000 | 3.506464000  |
| H | -0.997417000 | 12.595982000 | 3.286020000  |
| C | 4.806374000  | 11.160756000 | 5.387891000  |
| H | 4.419893000  | 10.142357000 | 5.402059000  |
| H | 5.894835000  | 11.087255000 | 5.358666000  |
| H | 4.553338000  | 11.704555000 | 6.301046000  |

|   |              |              |              |
|---|--------------|--------------|--------------|
| C | 2.755310000  | 4.765854000  | 5.533167000  |
| H | 3.211429000  | 4.323392000  | 4.656240000  |
| C | 1.833952000  | 14.804889000 | 11.766696000 |
| H | 1.701640000  | 15.611619000 | 12.482189000 |
| C | -0.020911000 | 5.355408000  | 9.757180000  |
| H | 0.622274000  | 4.577117000  | 10.180328000 |
| H | -0.554785000 | 5.826038000  | 10.589583000 |
| H | -0.766582000 | 4.878233000  | 9.113144000  |
| C | 4.976325000  | 13.291255000 | 4.151367000  |
| H | 4.655573000  | 13.877118000 | 5.016924000  |
| H | 6.065543000  | 13.185571000 | 4.197670000  |
| H | 4.738954000  | 13.864981000 | 3.251410000  |
| C | 3.911131000  | 6.203436000  | 3.411849000  |
| H | 4.652754000  | 5.432737000  | 3.644477000  |
| H | 3.050425000  | 5.729320000  | 2.927873000  |
| H | 4.367766000  | 6.882029000  | 2.683418000  |
| C | -0.549128000 | 9.621300000  | 5.628844000  |
| H | -1.346070000 | 9.206609000  | 6.255569000  |
| H | -0.653436000 | 9.193222000  | 4.626486000  |
| H | 0.408110000  | 9.289648000  | 6.030205000  |
| C | 0.090915000  | 11.125227000 | 12.789947000 |
| H | -0.768893000 | 11.797910000 | 12.705322000 |
| H | -0.293511000 | 10.117448000 | 12.979903000 |
| H | 0.677824000  | 11.419722000 | 13.665552000 |
| C | 1.000430000  | 12.948685000 | 2.627904000  |
| H | 0.691114000  | 13.497379000 | 1.742822000  |
| C | 0.930691000  | 11.100796000 | 11.506009000 |
| C | 2.129119000  | 3.932072000  | 6.449433000  |
| H | 2.107521000  | 2.857613000  | 6.290788000  |
| C | 4.847576000  | 11.120047000 | 2.927902000  |
| H | 4.611868000  | 11.620348000 | 1.984546000  |
| H | 5.937905000  | 11.024764000 | 2.990806000  |
| H | 4.422213000  | 10.113455000 | 2.888622000  |
| C | 2.343243000  | 12.742609000 | 2.891988000  |
| H | 3.078622000  | 13.134505000 | 2.196347000  |
| C | 0.020419000  | 10.563339000 | 10.397227000 |
| H | -0.822244000 | 11.239781000 | 10.223701000 |
| H | 0.556141000  | 10.465623000 | 9.452750000  |
| H | -0.378673000 | 9.584360000  | 10.676964000 |
| C | 2.103921000  | 10.148173000 | 11.753618000 |
| H | 1.744307000  | 9.145775000  | 12.003627000 |
| H | 2.753299000  | 10.080508000 | 10.878425000 |
| H | 2.714403000  | 10.504874000 | 12.586735000 |

$[\text{ArL}_3\text{UNUArL}_3]^{3-} E = -4737.09243300$

|   |              |             |              |
|---|--------------|-------------|--------------|
| U | 5.733496000  | 7.911611000 | 9.142322000  |
| O | 3.647474000  | 7.632235000 | 8.194266000  |
| O | 8.024342000  | 7.939309000 | 8.743364000  |
| O | 5.767344000  | 5.773294000 | 10.008866000 |
| N | 5.468970000  | 9.641469000 | 10.285624000 |
| C | 2.455382000  | 7.630807000 | 7.652790000  |
| C | 1.314470000  | 7.181119000 | 8.400417000  |
| C | 0.052968000  | 7.247498000 | 7.805556000  |
| H | -0.817368000 | 6.924855000 | 8.367081000  |
| C | -0.133537000 | 7.718652000 | 6.508665000  |
| H | -1.128668000 | 7.759069000 | 6.072505000  |
| C | 0.977482000  | 8.124026000 | 5.775605000  |
| H | 0.824694000  | 8.479450000 | 4.761584000  |
| C | 2.268355000  | 8.090644000 | 6.306284000  |
| C | 1.464669000  | 6.650305000 | 9.831687000  |
| C | 2.412772000  | 5.441023000 | 9.856352000  |
| H | 2.063496000  | 4.658366000 | 9.172208000  |
| H | 2.448577000  | 5.009971000 | 10.863558000 |

|   |              |              |              |
|---|--------------|--------------|--------------|
| H | 3.425574000  | 5.722075000  | 9.576979000  |
| C | 1.992446000  | 7.754557000  | 10.758232000 |
| H | 2.916864000  | 8.204524000  | 10.390604000 |
| H | 2.182409000  | 7.345408000  | 11.755616000 |
| H | 1.252544000  | 8.551230000  | 10.863790000 |
| C | 0.125136000  | 6.186796000  | 10.421646000 |
| H | -0.600780000 | 7.004300000  | 10.490601000 |
| H | 0.295068000  | 5.819521000  | 11.440339000 |
| H | -0.324157000 | 5.368373000  | 9.846528000  |
| C | 3.459838000  | 8.572547000  | 5.470294000  |
| C | 4.073755000  | 9.823688000  | 6.115882000  |
| H | 4.356018000  | 9.649105000  | 7.155959000  |
| H | 3.358063000  | 10.651018000 | 6.101362000  |
| H | 4.965210000  | 10.140157000 | 5.563764000  |
| C | 3.052081000  | 8.962305000  | 4.042765000  |
| H | 3.940706000  | 9.295574000  | 3.494212000  |
| H | 2.331976000  | 9.787604000  | 4.028321000  |
| H | 2.619297000  | 8.119789000  | 3.491072000  |
| C | 4.520398000  | 7.466698000  | 5.340434000  |
| H | 4.088258000  | 6.570143000  | 4.880646000  |
| H | 4.929159000  | 7.183786000  | 6.312980000  |
| H | 5.344893000  | 7.808833000  | 4.704888000  |
| C | 9.295450000  | 8.247600000  | 8.663938000  |
| C | 9.831419000  | 8.818306000  | 7.460227000  |
| C | 11.166029000 | 9.225372000  | 7.435753000  |
| H | 11.569563000 | 9.680855000  | 6.537416000  |
| C | 12.005338000 | 9.072133000  | 8.534869000  |
| H | 13.040067000 | 9.403249000  | 8.493127000  |
| C | 11.501333000 | 8.464987000  | 9.681491000  |
| H | 12.163974000 | 8.335178000  | 10.529996000 |
| C | 10.176973000 | 8.033784000  | 9.778102000  |
| C | 8.946703000  | 9.010186000  | 6.222417000  |
| C | 7.849566000  | 10.047143000 | 6.510581000  |
| H | 7.239626000  | 9.767272000  | 7.371478000  |
| H | 7.192049000  | 10.155574000 | 5.639801000  |
| H | 8.291266000  | 11.025597000 | 6.722987000  |
| C | 9.738571000  | 9.523909000  | 5.012243000  |
| H | 10.175209000 | 10.513046000 | 5.188476000  |
| H | 9.063460000  | 9.616121000  | 4.153656000  |
| H | 10.545365000 | 8.839178000  | 4.726265000  |
| C | 8.318939000  | 7.669414000  | 5.807515000  |
| H | 9.100556000  | 6.931725000  | 5.589744000  |
| H | 7.713426000  | 7.795245000  | 4.902060000  |
| H | 7.686796000  | 7.271626000  | 6.601920000  |
| C | 9.679068000  | 7.382358000  | 11.074047000 |
| C | 10.819558000 | 7.139644000  | 12.074172000 |
| H | 11.603286000 | 6.491141000  | 11.664384000 |
| H | 10.411751000 | 6.644326000  | 12.962562000 |
| H | 11.280607000 | 8.074732000  | 12.410234000 |
| C | 9.042969000  | 6.015318000  | 10.776216000 |
| H | 8.154011000  | 6.116778000  | 10.158535000 |
| H | 8.750933000  | 5.520275000  | 11.709547000 |
| H | 9.756146000  | 5.359982000  | 10.260990000 |
| C | 8.674664000  | 8.305831000  | 11.780516000 |
| H | 9.166090000  | 9.232602000  | 12.086540000 |
| H | 8.293207000  | 7.818054000  | 12.683851000 |
| H | 7.818767000  | 8.576874000  | 11.154481000 |
| C | 5.794150000  | 4.550207000  | 10.478248000 |
| C | 5.635564000  | 4.273794000  | 11.875498000 |
| C | 5.683062000  | 2.942912000  | 12.308059000 |
| H | 5.565259000  | 2.734037000  | 13.368570000 |
| C | 5.872918000  | 1.877294000  | 11.441178000 |
| H | 5.904260000  | 0.855771000  | 11.812006000 |

|   |              |              |              |
|---|--------------|--------------|--------------|
| C | 6.021509000  | 2.145600000  | 10.082415000 |
| H | 6.169128000  | 1.309431000  | 9.407411000  |
| C | 5.987197000  | 3.443238000  | 9.573605000  |
| C | 6.160164000  | 3.668739000  | 8.062476000  |
| C | 4.913106000  | 4.340196000  | 7.463165000  |
| H | 4.026185000  | 3.715323000  | 7.618040000  |
| H | 5.043273000  | 4.474348000  | 6.382626000  |
| H | 4.721024000  | 5.318072000  | 7.904737000  |
| C | 7.406135000  | 4.524496000  | 7.782586000  |
| H | 7.340138000  | 5.509486000  | 8.244619000  |
| H | 7.532317000  | 4.663295000  | 6.701670000  |
| H | 8.307222000  | 4.030260000  | 8.164393000  |
| C | 6.354415000  | 2.349643000  | 7.299772000  |
| H | 7.252772000  | 1.811169000  | 7.622039000  |
| H | 6.469826000  | 2.569541000  | 6.232539000  |
| H | 5.494733000  | 1.678104000  | 7.405373000  |
| C | 5.413760000  | 5.320349000  | 12.987998000 |
| C | 5.337458000  | 6.775568000  | 12.530138000 |
| H | 6.253401000  | 7.102183000  | 12.040915000 |
| H | 5.187314000  | 7.411305000  | 13.408357000 |
| H | 4.504729000  | 6.952126000  | 11.848507000 |
| C | 6.569881000  | 5.233899000  | 14.002222000 |
| H | 6.665664000  | 4.237778000  | 14.446670000 |
| H | 6.413379000  | 5.949641000  | 14.818671000 |
| H | 7.521985000  | 5.479951000  | 13.521706000 |
| C | 4.089617000  | 5.017766000  | 13.715381000 |
| H | 3.245529000  | 5.087696000  | 13.021470000 |
| H | 3.925037000  | 5.746875000  | 14.517741000 |
| H | 4.072814000  | 4.019546000  | 14.164802000 |
| U | 5.062347000  | 11.231253000 | 11.569084000 |
| O | 7.151122000  | 11.577555000 | 12.518367000 |
| O | 2.751826000  | 11.076530000 | 11.897414000 |
| O | 4.997782000  | 13.343131000 | 10.671563000 |
| C | 8.364055000  | 11.524037000 | 13.006887000 |
| C | 9.493363000  | 11.916092000 | 12.210991000 |
| C | 10.775277000 | 11.751862000 | 12.739108000 |
| H | 11.636510000 | 12.014562000 | 12.134217000 |
| C | 10.994565000 | 11.253186000 | 14.020583000 |
| H | 12.005966000 | 11.132735000 | 14.400904000 |
| C | 9.896181000  | 10.930167000 | 14.811815000 |
| H | 10.073612000 | 10.561543000 | 15.817158000 |
| C | 8.586240000  | 11.061152000 | 14.347297000 |
| C | 9.311137000  | 12.467957000 | 10.791547000 |
| C | 8.382509000  | 13.692962000 | 10.804112000 |
| H | 8.764203000  | 14.465124000 | 11.483142000 |
| H | 8.325054000  | 14.131849000 | 9.801292000  |
| H | 7.374314000  | 13.424057000 | 11.111085000 |
| C | 8.742595000  | 11.378637000 | 9.871123000  |
| H | 7.785483000  | 10.982064000 | 10.219917000 |
| H | 8.594408000  | 11.779916000 | 8.862789000  |
| H | 9.445683000  | 10.546878000 | 9.795095000  |
| C | 10.643156000 | 12.915885000 | 10.172213000 |
| H | 11.341309000 | 12.081445000 | 10.045803000 |
| H | 10.449901000 | 13.326178000 | 9.174300000  |
| H | 11.136070000 | 13.698387000 | 10.761735000 |
| C | 7.404645000  | 10.678124000 | 15.246531000 |
| C | 6.684678000  | 9.450743000  | 14.666545000 |
| H | 6.387622000  | 9.607236000  | 13.627838000 |
| H | 7.341713000  | 8.575850000  | 14.691558000 |
| H | 5.788954000  | 9.216538000  | 15.253023000 |
| C | 7.848491000  | 10.305049000 | 16.667758000 |
| H | 6.964576000  | 10.059975000 | 17.267955000 |
| H | 8.504597000  | 9.427965000  | 16.682037000 |

|   |              |              |              |
|---|--------------|--------------|--------------|
| H | 8.368474000  | 11.130350000 | 17.167867000 |
| C | 6.426110000  | 11.857088000 | 15.381614000 |
| H | 6.941048000  | 12.739061000 | 15.779965000 |
| H | 5.990164000  | 12.124536000 | 14.417188000 |
| H | 5.614743000  | 11.600678000 | 16.072762000 |
| C | 1.472858000  | 10.836110000 | 12.033915000 |
| C | 0.964243000  | 10.279180000 | 13.256848000 |
| C | -0.387425000 | 9.941845000  | 13.341426000 |
| H | -0.772083000 | 9.500559000  | 14.255164000 |
| C | -1.266937000 | 10.145715000 | 12.282835000 |
| H | -2.313585000 | 9.864446000  | 12.369366000 |
| C | -0.786441000 | 10.738719000 | 11.118730000 |
| H | -1.482120000 | 10.912487000 | 10.304797000 |
| C | 0.551351000  | 11.108130000 | 10.964580000 |
| C | 1.897489000  | 10.024445000 | 14.447119000 |
| C | 2.940210000  | 8.958125000  | 14.079159000 |
| H | 3.510952000  | 9.238287000  | 13.192268000 |
| H | 3.639156000  | 8.804840000  | 14.909500000 |
| H | 2.451588000  | 8.001494000  | 13.871192000 |
| C | 1.145847000  | 9.503754000  | 15.679746000 |
| H | 0.664479000  | 8.536987000  | 15.495398000 |
| H | 1.857463000  | 9.360798000  | 16.501150000 |
| H | 0.379990000  | 10.207492000 | 16.025913000 |
| C | 2.595253000  | 11.328362000 | 14.867647000 |
| H | 1.855456000  | 12.086100000 | 15.151798000 |
| H | 3.246554000  | 11.152106000 | 15.731860000 |
| H | 3.198635000  | 11.732368000 | 14.053105000 |
| C | 1.018822000  | 11.762903000 | 9.658642000  |
| C | -0.148822000 | 12.048277000 | 8.703080000  |
| H | -0.895610000 | 12.719673000 | 9.143805000  |
| H | 0.241964000  | 12.534868000 | 7.802306000  |
| H | -0.653367000 | 11.130608000 | 8.381043000  |
| C | 1.702544000  | 13.106821000 | 9.953376000  |
| H | 2.607094000  | 12.969190000 | 10.541149000 |
| H | 1.981464000  | 13.608134000 | 9.019096000  |
| H | 1.025549000  | 13.774644000 | 10.500015000 |
| C | 1.977608000  | 10.831165000 | 8.904234000  |
| H | 1.459646000  | 9.916579000  | 8.602335000  |
| H | 2.338781000  | 11.324424000 | 7.996014000  |
| H | 2.846226000  | 10.542159000 | 9.499605000  |
| C | 4.911883000  | 14.560309000 | 10.190908000 |
| C | 5.050695000  | 14.830244000 | 8.790355000  |
| C | 4.936444000  | 16.153364000 | 8.346138000  |
| H | 5.041482000  | 16.357197000 | 7.283245000  |
| C | 4.694619000  | 17.216296000 | 9.203219000  |
| H | 4.610050000  | 18.231232000 | 8.822785000  |
| C | 4.567353000  | 16.954423000 | 10.565191000 |
| H | 4.382407000  | 17.788788000 | 11.233157000 |
| C | 4.671513000  | 15.665143000 | 11.086324000 |
| C | 4.537442000  | 15.450564000 | 12.603185000 |
| C | 5.830195000  | 14.849606000 | 13.179169000 |
| H | 6.683215000  | 15.507868000 | 12.978059000 |
| H | 5.741198000  | 14.740584000 | 14.266893000 |
| H | 6.051190000  | 13.869100000 | 12.757620000 |
| C | 3.341297000  | 14.540383000 | 12.924470000 |
| H | 3.434489000  | 13.560102000 | 12.456824000 |
| H | 3.260496000  | 14.393511000 | 14.008422000 |
| H | 2.406007000  | 14.994745000 | 12.577470000 |
| C | 4.295747000  | 16.768540000 | 13.354792000 |
| H | 3.369348000  | 17.262370000 | 13.040718000 |
| H | 4.206109000  | 16.555599000 | 14.425888000 |
| H | 5.122998000  | 17.476482000 | 13.229321000 |
| C | 5.321724000  | 13.787292000 | 7.685191000  |



|   |             |              |             |
|---|-------------|--------------|-------------|
| C | 5.454328000 | 12.338190000 | 8.149305000 |
| H | 4.541676000 | 11.967265000 | 8.613258000 |
| H | 5.659297000 | 11.710467000 | 7.277056000 |
| H | 6.271919000 | 12.198123000 | 8.854163000 |
| C | 4.169866000 | 13.822080000 | 6.662959000 |
| H | 4.036246000 | 14.810468000 | 6.210835000 |
| H | 4.359856000 | 13.108101000 | 5.852477000 |
| H | 3.225760000 | 13.540305000 | 7.139848000 |
| C | 6.637254000 | 14.141391000 | 6.965294000 |
| H | 7.479262000 | 14.104776000 | 7.664101000 |
| H | 6.835486000 | 13.417337000 | 6.165615000 |
| H | 6.617293000 | 15.139240000 | 6.514966000 |

$[\text{ArL}_3\text{UNUArL}_3]^{2-}$  E = -4737.08007234

|   |              |              |              |
|---|--------------|--------------|--------------|
| U | 6.843095000  | 9.442996000  | 8.865274000  |
| O | 7.403039000  | 7.577961000  | 7.710205000  |
| O | 7.412716000  | 11.524297000 | 9.533146000  |
| O | 7.568511000  | 8.533448000  | 10.773758000 |
| N | 5.010645000  | 9.776052000  | 8.249184000  |
| C | 7.612161000  | 12.810721000 | 9.765926000  |
| C | 7.531431000  | 6.576182000  | 6.855120000  |
| C | 6.945377000  | 5.303051000  | 7.143299000  |
| C | 5.102501000  | 12.014786000 | 11.466464000 |
| H | 4.626547000  | 11.350194000 | 12.193187000 |
| H | 5.250565000  | 11.461738000 | 10.536749000 |
| H | 4.404560000  | 12.829259000 | 11.254793000 |
| C | 7.132513000  | 13.404737000 | 10.975840000 |
| C | 9.321252000  | 7.910330000  | 12.249941000 |
| C | 6.232598000  | 5.035934000  | 8.472891000  |
| C | 8.246230000  | 6.756509000  | 5.629642000  |
| C | 8.296695000  | 13.621627000 | 8.808370000  |
| C | 8.272208000  | 5.710401000  | 4.704790000  |
| H | 8.792937000  | 5.843664000  | 3.762985000  |
| C | 9.765969000  | 11.853895000 | 7.743769000  |
| H | 10.617428000 | 12.171430000 | 8.355549000  |
| H | 10.155702000 | 11.475357000 | 6.792974000  |
| H | 9.273876000  | 11.034845000 | 8.268105000  |
| C | 7.004782000  | 4.302872000  | 6.170590000  |
| H | 6.535690000  | 3.344811000  | 6.364190000  |
| C | 8.810951000  | 13.030354000 | 7.491723000  |
| C | 7.924415000  | 8.028780000  | 11.946572000 |
| C | 7.326215000  | 11.431970000 | 12.524596000 |
| H | 8.277966000  | 11.830853000 | 12.894083000 |
| H | 7.537040000  | 10.720471000 | 11.730121000 |
| H | 6.852328000  | 10.889526000 | 13.349834000 |
| C | 7.614238000  | 12.581641000 | 6.641887000  |
| H | 6.963229000  | 11.887312000 | 7.178207000  |
| H | 7.955184000  | 12.103175000 | 5.718904000  |
| H | 7.004147000  | 13.445417000 | 6.364546000  |
| C | 8.445354000  | 14.986716000 | 9.064967000  |
| H | 8.953088000  | 15.613873000 | 8.340419000  |
| C | 7.177171000  | 5.328197000  | 9.649997000  |
| H | 8.096096000  | 4.736993000  | 9.561018000  |
| H | 6.698825000  | 5.055657000  | 10.596936000 |
| H | 7.449884000  | 6.379547000  | 9.700640000  |
| C | 6.413796000  | 12.569945000 | 12.039821000 |
| C | 10.269603000 | 7.494752000  | 9.950173000  |
| H | 11.034161000 | 7.801300000  | 9.227106000  |
| H | 9.291176000  | 7.594131000  | 9.480520000  |
| H | 10.424756000 | 6.432470000  | 10.169116000 |
| C | 11.816584000 | 8.097994000  | 11.767825000 |
| H | 12.008835000 | 7.042308000  | 11.988074000 |
| H | 12.022063000 | 8.682038000  | 12.671573000 |

|   |              |              |              |
|---|--------------|--------------|--------------|
| H | 12.538438000 | 8.410186000  | 11.004856000 |
| C | 5.783553000  | 3.573733000  | 8.610583000  |
| H | 5.045048000  | 3.296677000  | 7.850678000  |
| H | 5.304975000  | 3.441689000  | 9.587502000  |
| H | 6.623305000  | 2.870923000  | 8.556868000  |
| C | 4.959227000  | 5.887517000  | 8.549032000  |
| H | 5.155488000  | 6.951914000  | 8.408156000  |
| H | 4.463266000  | 5.751169000  | 9.515823000  |
| H | 4.261645000  | 5.578436000  | 7.768436000  |
| C | 10.395046000 | 8.330556000  | 11.235227000 |
| C | 6.956405000  | 7.608198000  | 12.904898000 |
| C | 5.422846000  | 7.649465000  | 12.743547000 |
| C | 9.700350000  | 7.395618000  | 13.489052000 |
| H | 10.752651000 | 7.304783000  | 13.733461000 |
| C | 4.905645000  | 8.212479000  | 11.420967000 |
| H | 5.182320000  | 9.259393000  | 11.287233000 |
| H | 3.814062000  | 8.167908000  | 11.421336000 |
| H | 5.246285000  | 7.625897000  | 10.568225000 |
| C | 7.311492000  | 14.776769000 | 11.164428000 |
| H | 6.935865000  | 15.242558000 | 12.068839000 |
| C | 7.643937000  | 4.495009000  | 4.950295000  |
| H | 7.668663000  | 3.700785000  | 4.208624000  |
| C | 9.594884000  | 14.052119000 | 6.655524000  |
| H | 8.979269000  | 14.908067000 | 6.360092000  |
| H | 9.942064000  | 13.569730000 | 5.734902000  |
| H | 10.477074000 | 14.428212000 | 7.185565000  |
| C | 4.860019000  | 6.220601000  | 12.865913000 |
| H | 5.243127000  | 5.580576000  | 12.065296000 |
| H | 3.766414000  | 6.239131000  | 12.786538000 |
| H | 5.116061000  | 5.752309000  | 13.821062000 |
| C | 6.033489000  | 13.400243000 | 13.273110000 |
| H | 5.338805000  | 14.210382000 | 13.026347000 |
| H | 6.909064000  | 13.830607000 | 13.772884000 |
| H | 5.528825000  | 12.749350000 | 13.995744000 |
| C | 10.289976000 | 9.832509000  | 10.920886000 |
| H | 11.049960000 | 10.115400000 | 10.182870000 |
| H | 10.464953000 | 10.426468000 | 11.824540000 |
| H | 9.312579000  | 10.113624000 | 10.530723000 |
| C | 9.767172000  | 8.005706000  | 4.007904000  |
| H | 10.531311000 | 7.220909000  | 4.029704000  |
| H | 10.279117000 | 8.962003000  | 3.851974000  |
| H | 9.122590000  | 7.835639000  | 3.139099000  |
| C | 8.762415000  | 6.989300000  | 14.433990000 |
| H | 9.081358000  | 6.592138000  | 15.394114000 |
| C | 8.970038000  | 8.071242000  | 5.318313000  |
| C | 7.954269000  | 15.575327000 | 10.224223000 |
| H | 8.076632000  | 16.641457000 | 10.396935000 |
| C | 4.816538000  | 8.513805000  | 13.864865000 |
| H | 5.065390000  | 8.137429000  | 14.861678000 |
| H | 3.724281000  | 8.530114000  | 13.778712000 |
| H | 5.175242000  | 9.545276000  | 13.797038000 |
| C | 7.415793000  | 7.098735000  | 14.127081000 |
| H | 6.687500000  | 6.777979000  | 14.867123000 |
| C | 9.978041000  | 8.390036000  | 6.433554000  |
| H | 10.690938000 | 7.566464000  | 6.551184000  |
| H | 9.480269000  | 8.533044000  | 7.392024000  |
| H | 10.545353000 | 9.295594000  | 6.192476000  |
| C | 7.956182000  | 9.213366000  | 5.163084000  |
| H | 8.474743000  | 10.168032000 | 5.028217000  |
| H | 7.290281000  | 9.292620000  | 6.024772000  |
| H | 7.323829000  | 9.047715000  | 4.285721000  |
| U | 2.889468000  | 10.020194000 | 7.764070000  |
| O | 2.277873000  | 11.749749000 | 9.121168000  |

|   |              |              |              |
|---|--------------|--------------|--------------|
| O | 2.269481000  | 7.926771000  | 7.100601000  |
| O | 2.173243000  | 10.974138000 | 5.850352000  |
| C | 2.138651000  | 6.639625000  | 6.844024000  |
| C | 2.059698000  | 12.744930000 | 9.959424000  |
| C | 2.533086000  | 14.065760000 | 9.663606000  |
| C | 4.718147000  | 7.510592000  | 5.207750000  |
| H | 5.219699000  | 8.149108000  | 4.472930000  |
| H | 4.536708000  | 8.103746000  | 6.105798000  |
| H | 5.404648000  | 6.704689000  | 5.474832000  |
| C | 2.722447000  | 6.065976000  | 5.667518000  |
| C | 0.359185000  | 11.871673000 | 4.600204000  |
| C | 3.244617000  | 14.387450000 | 8.343933000  |
| C | 1.358022000  | 12.514697000 | 11.187115000 |
| C | 1.423261000  | 5.791387000  | 7.750150000  |
| C | 1.200993000  | 13.572502000 | 12.085958000 |
| H | 0.682580000  | 13.404271000 | 13.023682000 |
| C | -0.330105000 | 7.428378000  | 8.498507000  |
| H | -1.040585000 | 6.988464000  | 7.789522000  |
| H | -0.900992000 | 7.813937000  | 9.350460000  |
| H | 0.166576000  | 8.262543000  | 8.003517000  |
| C | 2.345773000  | 15.073158000 | 10.613237000 |
| H | 2.717023000  | 16.071494000 | 10.409742000 |
| C | 0.683471000  | 6.369354000  | 8.962338000  |
| C | 1.767609000  | 11.668458000 | 4.804429000  |
| C | 2.498274000  | 8.050404000  | 4.124545000  |
| H | 1.559580000  | 7.633224000  | 3.741416000  |
| H | 2.263051000  | 8.760109000  | 4.914724000  |
| H | 2.974279000  | 8.602960000  | 3.306079000  |
| C | 1.682227000  | 6.974644000  | 9.959169000  |
| H | 2.312970000  | 7.733795000  | 9.492499000  |
| H | 1.150945000  | 7.431027000  | 10.801012000 |
| H | 2.343545000  | 6.198648000  | 10.357638000 |
| C | 1.418459000  | 4.413550000  | 7.524290000  |
| H | 0.905519000  | 3.759620000  | 8.221190000  |
| C | 2.328015000  | 14.050704000 | 7.158290000  |
| H | 1.386640000  | 14.608195000 | 7.226090000  |
| H | 2.808918000  | 14.323673000 | 6.212538000  |
| H | 2.098234000  | 12.989207000 | 7.120021000  |
| C | 3.428127000  | 6.930136000  | 4.615823000  |
| C | -0.567502000 | 11.794072000 | 6.957477000  |
| H | -1.312584000 | 11.320944000 | 7.608016000  |
| H | 0.418267000  | 11.623311000 | 7.390544000  |
| H | -0.752308000 | 12.873807000 | 6.966861000  |
| C | -2.122764000 | 11.522777000 | 5.066715000  |
| H | -2.359103000 | 12.592668000 | 5.074614000  |
| H | -2.319223000 | 11.133931000 | 4.061320000  |
| H | -2.821718000 | 11.030112000 | 5.751758000  |
| C | 3.606685000  | 15.874878000 | 8.222886000  |
| H | 4.309662000  | 16.194028000 | 9.000353000  |
| H | 4.095438000  | 16.042199000 | 7.256480000  |
| H | 2.724980000  | 16.525045000 | 8.261127000  |
| C | 4.565694000  | 13.612863000 | 8.242003000  |
| H | 4.434763000  | 12.536309000 | 8.364654000  |
| H | 5.025297000  | 13.790103000 | 7.264829000  |
| H | 5.269272000  | 13.951683000 | 9.007666000  |
| C | -0.685894000 | 11.235576000 | 5.530228000  |
| C | 2.693863000  | 12.232627000 | 3.874366000  |
| C | 4.227727000  | 12.064180000 | 3.892207000  |
| C | -0.063062000 | 12.652379000 | 3.524769000  |
| H | -1.122704000 | 12.820482000 | 3.368879000  |
| C | 4.801561000  | 11.252975000 | 5.052130000  |
| H | 4.398728000  | 10.242211000 | 5.084958000  |
| H | 5.885269000  | 11.173953000 | 4.923037000  |

|   |              |              |              |
|---|--------------|--------------|--------------|
| H | 4.624148000  | 11.731113000 | 6.016667000  |
| C | 2.679675000  | 4.679177000  | 5.506830000  |
| H | 3.150581000  | 4.229919000  | 4.639759000  |
| C | 1.694942000  | 14.844204000 | 11.820835000 |
| H | 1.566422000  | 15.648963000 | 12.540197000 |
| C | -0.112222000 | 5.301334000  | 9.725418000  |
| H | 0.533364000  | 4.525784000  | 10.151405000 |
| H | -0.642472000 | 5.776836000  | 10.558256000 |
| H | -0.861267000 | 4.815755000  | 9.090121000  |
| C | 4.899604000  | 13.449160000 | 3.941605000  |
| H | 4.623137000  | 13.982191000 | 4.856722000  |
| H | 5.990238000  | 13.337869000 | 3.934335000  |
| H | 4.626328000  | 14.080357000 | 3.090359000  |
| C | 3.842112000  | 6.116398000  | 3.380999000  |
| H | 4.584563000  | 5.348623000  | 3.622864000  |
| H | 2.986734000  | 5.635089000  | 2.892549000  |
| H | 4.303263000  | 6.791132000  | 2.651093000  |
| C | -0.529236000 | 9.705744000  | 5.539091000  |
| H | -1.305404000 | 9.252738000  | 6.167045000  |
| H | -0.642289000 | 9.304354000  | 4.525785000  |
| H | 0.443217000  | 9.394602000  | 5.919157000  |
| C | 0.037107000  | 11.118662000 | 12.865631000 |
| H | -0.839110000 | 11.775028000 | 12.818422000 |
| H | -0.321527000 | 10.102325000 | 13.063598000 |
| H | 0.647582000  | 11.420092000 | 13.723435000 |
| C | 0.836843000  | 13.229137000 | 2.632816000  |
| H | 0.482781000  | 13.836445000 | 1.803754000  |
| C | 0.833890000  | 11.120854000 | 11.553975000 |
| C | 2.056295000  | 3.843763000  | 6.428021000  |
| H | 2.047785000  | 2.766843000  | 6.280952000  |
| C | 4.659513000  | 11.351168000 | 2.596227000  |
| H | 4.357500000  | 11.900460000 | 1.698944000  |
| H | 5.750578000  | 11.240734000 | 2.569450000  |
| H | 4.219830000  | 10.349933000 | 2.540761000  |
| C | 2.191564000  | 13.001687000 | 2.816581000  |
| H | 2.891357000  | 13.439068000 | 2.109326000  |
| C | -0.105468000 | 10.576331000 | 10.467568000 |
| H | -0.961704000 | 11.245483000 | 10.326499000 |
| H | 0.405039000  | 10.479649000 | 9.509567000  |
| H | -0.490302000 | 9.593713000  | 10.761020000 |
| C | 2.025435000  | 10.173831000 | 11.754046000 |
| H | 1.679558000  | 9.160537000  | 11.983776000 |
| H | 2.660180000  | 10.133737000 | 10.866983000 |
| H | 2.642996000  | 10.513961000 | 12.590083000 |

[ArL<sub>3</sub>UNUArL<sub>3</sub>]<sup>1-</sup> E = -4737.03020664

|   |             |              |              |
|---|-------------|--------------|--------------|
| U | 6.843095000 | 9.442996000  | 8.865274000  |
| O | 7.403039000 | 7.577961000  | 7.710205000  |
| O | 7.412716000 | 11.524297000 | 9.533146000  |
| O | 7.568511000 | 8.533448000  | 10.773758000 |
| N | 5.010645000 | 9.776052000  | 8.249184000  |
| C | 7.612161000 | 12.810721000 | 9.765926000  |
| C | 7.531431000 | 6.576182000  | 6.855120000  |
| C | 6.945377000 | 5.303051000  | 7.143299000  |
| C | 5.102501000 | 12.014786000 | 11.466464000 |
| H | 4.626547000 | 11.350194000 | 12.193187000 |
| H | 5.250565000 | 11.461738000 | 10.536749000 |
| H | 4.404560000 | 12.829259000 | 11.254793000 |
| C | 7.132513000 | 13.404737000 | 10.975840000 |
| C | 9.321252000 | 7.910330000  | 12.249941000 |
| C | 6.232598000 | 5.035934000  | 8.472891000  |
| C | 8.246230000 | 6.756509000  | 5.629642000  |
| C | 8.296695000 | 13.621627000 | 8.808370000  |

|   |              |              |              |
|---|--------------|--------------|--------------|
| C | 8.272208000  | 5.710401000  | 4.704790000  |
| H | 8.792937000  | 5.843664000  | 3.762985000  |
| C | 9.765969000  | 11.853895000 | 7.743769000  |
| H | 10.617428000 | 12.171430000 | 8.355549000  |
| H | 10.155702000 | 11.475357000 | 6.792974000  |
| H | 9.273876000  | 11.034845000 | 8.268105000  |
| C | 7.004782000  | 4.302872000  | 6.170590000  |
| H | 6.535690000  | 3.344811000  | 6.364190000  |
| C | 8.810951000  | 13.030354000 | 7.491723000  |
| C | 7.924415000  | 8.028780000  | 11.946572000 |
| C | 7.326215000  | 11.431970000 | 12.524596000 |
| H | 8.277966000  | 11.830853000 | 12.894083000 |
| H | 7.537040000  | 10.720471000 | 11.730121000 |
| H | 6.852328000  | 10.889526000 | 13.349834000 |
| C | 7.614238000  | 12.581641000 | 6.641887000  |
| H | 6.963229000  | 11.887312000 | 7.178207000  |
| H | 7.955184000  | 12.103175000 | 5.718904000  |
| H | 7.004147000  | 13.445417000 | 6.364546000  |
| C | 8.445354000  | 14.986716000 | 9.064967000  |
| H | 8.953088000  | 15.613873000 | 8.340419000  |
| C | 7.177171000  | 5.328197000  | 9.649997000  |
| H | 8.096096000  | 4.736993000  | 9.561018000  |
| H | 6.698825000  | 5.055657000  | 10.596936000 |
| H | 7.449884000  | 6.379547000  | 9.700640000  |
| C | 6.413796000  | 12.569945000 | 12.039821000 |
| C | 10.269603000 | 7.494752000  | 9.950173000  |
| H | 11.034161000 | 7.801300000  | 9.227106000  |
| H | 9.291176000  | 7.594131000  | 9.480520000  |
| H | 10.424756000 | 6.432470000  | 10.169116000 |
| C | 11.816584000 | 8.097994000  | 11.767825000 |
| H | 12.008835000 | 7.042308000  | 11.988074000 |
| H | 12.022063000 | 8.682038000  | 12.671573000 |
| H | 12.538438000 | 8.410186000  | 11.004856000 |
| C | 5.783553000  | 3.573733000  | 8.610583000  |
| H | 5.045048000  | 3.296677000  | 7.850678000  |
| H | 5.304975000  | 3.441689000  | 9.587502000  |
| H | 6.623305000  | 2.870923000  | 8.556868000  |
| C | 4.959227000  | 5.887517000  | 8.549032000  |
| H | 5.155488000  | 6.951914000  | 8.408156000  |
| H | 4.463266000  | 5.751169000  | 9.515823000  |
| H | 4.261645000  | 5.578436000  | 7.768436000  |
| C | 10.395046000 | 8.330556000  | 11.235227000 |
| C | 6.956405000  | 7.608198000  | 12.904898000 |
| C | 5.422846000  | 7.649465000  | 12.743547000 |
| C | 9.700350000  | 7.395618000  | 13.489052000 |
| H | 10.752651000 | 7.304783000  | 13.733461000 |
| C | 4.905645000  | 8.212479000  | 11.420967000 |
| H | 5.182320000  | 9.259393000  | 11.287233000 |
| H | 3.814062000  | 8.167908000  | 11.421336000 |
| H | 5.246285000  | 7.625897000  | 10.568225000 |
| C | 7.311492000  | 14.776769000 | 11.164428000 |
| H | 6.935865000  | 15.242558000 | 12.068839000 |
| C | 7.643937000  | 4.495009000  | 4.950295000  |
| H | 7.668663000  | 3.700785000  | 4.208624000  |
| C | 9.594884000  | 14.052119000 | 6.655524000  |
| H | 8.979269000  | 14.908067000 | 6.360092000  |
| H | 9.942064000  | 13.569730000 | 5.734902000  |
| H | 10.477074000 | 14.428212000 | 7.185565000  |
| C | 4.860019000  | 6.220601000  | 12.865913000 |
| H | 5.243127000  | 5.580576000  | 12.065296000 |
| H | 3.766414000  | 6.239131000  | 12.786538000 |
| H | 5.116061000  | 5.752309000  | 13.821062000 |
| C | 6.033489000  | 13.400243000 | 13.273110000 |

|   |              |              |              |
|---|--------------|--------------|--------------|
| H | 5.338805000  | 14.210382000 | 13.026347000 |
| H | 6.909064000  | 13.830607000 | 13.772884000 |
| H | 5.528825000  | 12.749350000 | 13.995744000 |
| C | 10.289976000 | 9.832509000  | 10.920886000 |
| H | 11.049960000 | 10.115400000 | 10.182870000 |
| H | 10.464953000 | 10.426468000 | 11.824540000 |
| H | 9.312579000  | 10.113624000 | 10.530723000 |
| C | 9.767172000  | 8.005706000  | 4.007904000  |
| H | 10.531311000 | 7.220909000  | 4.029704000  |
| H | 10.279117000 | 8.962003000  | 3.851974000  |
| H | 9.122590000  | 7.835639000  | 3.139099000  |
| C | 8.762415000  | 6.989300000  | 14.433990000 |
| H | 9.081358000  | 6.592138000  | 15.394114000 |
| C | 8.970038000  | 8.071242000  | 5.318313000  |
| C | 7.954269000  | 15.575327000 | 10.224223000 |
| H | 8.076632000  | 16.641457000 | 10.396935000 |
| C | 4.816538000  | 8.513805000  | 13.864865000 |
| H | 5.065390000  | 8.137429000  | 14.861678000 |
| H | 3.724281000  | 8.530114000  | 13.778712000 |
| H | 5.175242000  | 9.545276000  | 13.797038000 |
| C | 7.415793000  | 7.098735000  | 14.127081000 |
| H | 6.687500000  | 6.777979000  | 14.867123000 |
| C | 9.978041000  | 8.390036000  | 6.433554000  |
| H | 10.690938000 | 7.566464000  | 6.551184000  |
| H | 9.480269000  | 8.533044000  | 7.392024000  |
| H | 10.545353000 | 9.295594000  | 6.192476000  |
| C | 7.956182000  | 9.213366000  | 5.163084000  |
| H | 8.474743000  | 10.168032000 | 5.028217000  |
| H | 7.290281000  | 9.292620000  | 6.024772000  |
| H | 7.323829000  | 9.047715000  | 4.285721000  |
| U | 3.054153000  | 10.001239000 | 7.801733000  |
| O | 2.442558000  | 11.730794000 | 9.158831000  |
| O | 2.434166000  | 7.907816000  | 7.138264000  |
| O | 2.337928000  | 10.955183000 | 5.888015000  |
| C | 2.303336000  | 6.620670000  | 6.881687000  |
| C | 2.224383000  | 12.725975000 | 9.997087000  |
| C | 2.697771000  | 14.046805000 | 9.701269000  |
| C | 4.882832000  | 7.491637000  | 5.245413000  |
| H | 5.384384000  | 8.130153000  | 4.510593000  |
| H | 4.701393000  | 8.084791000  | 6.143461000  |
| H | 5.569333000  | 6.685734000  | 5.512495000  |
| C | 2.887132000  | 6.047021000  | 5.705181000  |
| C | 0.523870000  | 11.852718000 | 4.637867000  |
| C | 3.409302000  | 14.368495000 | 8.381596000  |
| C | 1.522707000  | 12.495742000 | 11.224778000 |
| C | 1.587946000  | 5.772432000  | 7.787813000  |
| C | 1.365678000  | 13.553547000 | 12.123621000 |
| H | 0.847265000  | 13.385316000 | 13.061345000 |
| C | -0.165420000 | 7.409423000  | 8.536170000  |
| H | -0.875900000 | 6.969509000  | 7.827185000  |
| H | -0.736307000 | 7.794982000  | 9.388123000  |
| H | 0.331261000  | 8.243588000  | 8.041180000  |
| C | 2.510458000  | 15.054203000 | 10.650900000 |
| H | 2.881708000  | 16.052539000 | 10.447405000 |
| C | 0.848156000  | 6.350399000  | 9.000001000  |
| C | 1.932294000  | 11.649503000 | 4.842092000  |
| C | 2.662959000  | 8.031449000  | 4.162208000  |
| H | 1.724265000  | 7.614269000  | 3.779079000  |
| H | 2.427736000  | 8.741154000  | 4.952387000  |
| H | 3.138964000  | 8.584005000  | 3.343742000  |
| C | 1.846912000  | 6.955689000  | 9.996832000  |
| H | 2.477655000  | 7.714840000  | 9.530162000  |
| H | 1.315630000  | 7.412072000  | 10.838675000 |

|   |              |              |              |
|---|--------------|--------------|--------------|
| H | 2.508230000  | 6.179693000  | 10.395301000 |
| C | 1.583144000  | 4.394595000  | 7.561953000  |
| H | 1.070204000  | 3.740665000  | 8.258853000  |
| C | 2.492700000  | 14.031749000 | 7.195953000  |
| H | 1.551325000  | 14.589240000 | 7.263753000  |
| H | 2.973603000  | 14.304718000 | 6.250201000  |
| H | 2.262919000  | 12.970252000 | 7.157684000  |
| C | 3.592812000  | 6.911181000  | 4.653486000  |
| C | -0.402817000 | 11.775117000 | 6.995140000  |
| H | -1.147899000 | 11.301989000 | 7.645679000  |
| H | 0.582952000  | 11.604356000 | 7.428207000  |
| H | -0.587623000 | 12.854852000 | 7.004524000  |
| C | -1.958079000 | 11.503822000 | 5.104378000  |
| H | -2.194418000 | 12.573713000 | 5.112277000  |
| H | -2.154538000 | 11.114976000 | 4.098983000  |
| H | -2.657033000 | 11.011157000 | 5.789421000  |
| C | 3.771370000  | 15.855923000 | 8.260549000  |
| H | 4.474347000  | 16.175073000 | 9.038016000  |
| H | 4.260123000  | 16.023244000 | 7.294143000  |
| H | 2.889665000  | 16.506090000 | 8.298790000  |
| C | 4.730379000  | 13.593908000 | 8.279666000  |
| H | 4.599448000  | 12.517354000 | 8.402317000  |
| H | 5.189982000  | 13.771148000 | 7.302492000  |
| H | 5.433957000  | 13.932728000 | 9.045329000  |
| C | -0.521209000 | 11.216621000 | 5.567891000  |
| C | 2.858548000  | 12.213672000 | 3.912029000  |
| C | 4.392412000  | 12.045225000 | 3.929870000  |
| C | 0.101623000  | 12.633424000 | 3.562432000  |
| H | -0.958019000 | 12.801527000 | 3.406542000  |
| C | 4.966246000  | 11.234020000 | 5.089793000  |
| H | 4.563413000  | 10.223256000 | 5.122621000  |
| H | 6.049954000  | 11.154998000 | 4.960700000  |
| H | 4.788833000  | 11.712158000 | 6.054330000  |
| C | 2.844360000  | 4.660222000  | 5.544493000  |
| H | 3.315266000  | 4.210964000  | 4.677422000  |
| C | 1.859627000  | 14.825249000 | 11.858498000 |
| H | 1.731107000  | 15.630008000 | 12.577860000 |
| C | 0.052463000  | 5.282379000  | 9.763081000  |
| H | 0.698049000  | 4.506829000  | 10.189068000 |
| H | -0.477787000 | 5.757881000  | 10.595919000 |
| H | -0.696582000 | 4.796800000  | 9.127784000  |
| C | 5.064289000  | 13.430205000 | 3.979268000  |
| H | 4.787822000  | 13.963236000 | 4.894385000  |
| H | 6.154923000  | 13.318914000 | 3.971998000  |
| H | 4.791013000  | 14.061402000 | 3.128022000  |
| C | 4.006797000  | 6.097443000  | 3.418662000  |
| H | 4.749248000  | 5.329668000  | 3.660527000  |
| H | 3.151419000  | 5.616134000  | 2.930212000  |
| H | 4.467948000  | 6.772177000  | 2.688756000  |
| C | -0.364551000 | 9.686789000  | 5.576754000  |
| H | -1.140719000 | 9.233783000  | 6.204708000  |
| H | -0.477604000 | 9.285399000  | 4.563448000  |
| H | 0.607902000  | 9.375647000  | 5.956820000  |
| C | 0.201792000  | 11.099707000 | 12.903294000 |
| H | -0.674425000 | 11.756073000 | 12.856085000 |
| H | -0.156842000 | 10.083370000 | 13.101261000 |
| H | 0.812267000  | 11.401137000 | 13.761098000 |
| C | 1.001528000  | 13.210182000 | 2.670479000  |
| H | 0.647466000  | 13.817490000 | 1.841417000  |
| C | 0.998575000  | 11.101899000 | 11.591638000 |
| C | 2.220980000  | 3.824808000  | 6.465684000  |
| H | 2.212470000  | 2.747888000  | 6.318615000  |
| C | 4.824198000  | 11.332213000 | 2.633890000  |

|   |              |              |              |
|---|--------------|--------------|--------------|
| H | 4.522185000  | 11.881505000 | 1.736607000  |
| H | 5.915263000  | 11.221779000 | 2.607113000  |
| H | 4.384515000  | 10.330978000 | 2.578424000  |
| C | 2.356249000  | 12.982732000 | 2.854244000  |
| H | 3.056042000  | 13.420113000 | 2.146989000  |
| C | 0.059217000  | 10.557376000 | 10.505231000 |
| H | -0.797019000 | 11.226528000 | 10.364162000 |
| H | 0.569724000  | 10.460694000 | 9.547230000  |
| H | -0.325617000 | 9.574758000  | 10.798683000 |
| C | 2.190120000  | 10.154876000 | 11.791709000 |
| H | 1.844243000  | 9.141582000  | 12.021439000 |
| H | 2.824865000  | 10.114782000 | 10.904646000 |
| H | 2.807681000  | 10.495006000 | 12.627746000 |

[<sup>Ar</sup>L<sub>3</sub>USU<sup>Ar</sup>L<sub>3</sub>]<sup>2-</sup> E = -4692.61324984

|   |              |              |              |
|---|--------------|--------------|--------------|
| U | 7.279922000  | 9.436830000  | 9.014524000  |
| O | 7.595327000  | 7.643495000  | 7.690769000  |
| O | 7.733362000  | 11.567661000 | 9.643744000  |
| O | 7.721050000  | 8.440202000  | 10.928677000 |
| S | 4.790702000  | 9.737330000  | 8.269279000  |
| C | 7.774647000  | 12.869573000 | 9.874098000  |
| C | 7.690309000  | 6.701922000  | 6.769159000  |
| C | 7.140531000  | 5.400802000  | 7.003460000  |
| C | 5.173489000  | 11.908211000 | 11.415433000 |
| H | 4.705747000  | 11.207364000 | 12.114352000 |
| H | 5.393815000  | 11.370685000 | 10.490278000 |
| H | 4.436399000  | 12.679222000 | 11.174597000 |
| C | 7.128064000  | 13.427825000 | 11.023834000 |
| C | 9.412061000  | 7.648878000  | 12.395704000 |
| C | 6.393138000  | 5.064908000  | 8.300811000  |
| C | 8.336286000  | 6.982609000  | 5.524214000  |
| C | 8.464130000  | 13.736990000 | 8.968836000  |
| C | 8.430757000  | 5.966036000  | 4.570872000  |
| H | 8.919051000  | 6.164185000  | 3.623028000  |
| C | 10.282989000 | 12.161905000 | 8.211602000  |
| H | 11.007463000 | 12.638481000 | 8.881856000  |
| H | 10.832319000 | 11.768096000 | 7.348673000  |
| H | 9.832224000  | 11.328033000 | 8.750254000  |
| C | 7.266085000  | 4.435777000  | 6.000987000  |
| H | 6.851015000  | 3.446821000  | 6.159686000  |
| C | 9.223615000  | 13.181041000 | 7.757683000  |
| C | 8.029184000  | 7.839840000  | 12.068113000 |
| C | 7.370067000  | 11.471790000 | 12.601400000 |
| H | 8.260266000  | 11.937276000 | 13.041024000 |
| H | 7.693245000  | 10.780994000 | 11.826443000 |
| H | 6.875695000  | 10.889923000 | 13.387267000 |
| C | 8.236517000  | 12.537170000 | 6.773115000  |
| H | 7.659920000  | 11.737926000 | 7.241916000  |
| H | 8.772791000  | 12.123437000 | 5.912295000  |
| H | 7.522620000  | 13.279697000 | 6.402755000  |
| C | 8.422005000  | 15.115419000 | 9.190438000  |
| H | 8.924575000  | 15.783455000 | 8.499623000  |
| C | 7.292785000  | 5.306282000  | 9.523871000  |
| H | 8.225277000  | 4.735995000  | 9.437211000  |
| H | 6.785680000  | 4.976395000  | 10.437371000 |
| H | 7.545790000  | 6.357471000  | 9.641508000  |
| C | 6.414443000  | 12.545304000 | 12.055006000 |
| C | 10.449013000 | 7.412935000  | 10.098240000 |
| H | 11.234289000 | 7.782127000  | 9.427279000  |
| H | 9.486762000  | 7.554423000  | 9.605332000  |
| H | 10.596584000 | 6.334839000  | 10.224081000 |
| C | 11.926239000 | 7.830653000  | 12.021246000 |
| H | 12.094551000 | 6.757079000  | 12.158601000 |



|   |              |              |              |
|---|--------------|--------------|--------------|
| H | 12.103955000 | 8.332061000  | 12.978890000 |
| H | 12.682336000 | 8.192721000  | 11.315892000 |
| C | 5.952431000  | 3.594423000  | 8.351763000  |
| H | 5.250654000  | 3.346664000  | 7.548147000  |
| H | 5.432135000  | 3.414640000  | 9.299160000  |
| H | 6.799044000  | 2.899238000  | 8.303896000  |
| C | 5.111918000  | 5.907843000  | 8.392003000  |
| H | 5.305150000  | 6.978992000  | 8.311662000  |
| H | 4.605465000  | 5.723825000  | 9.345858000  |
| H | 4.419047000  | 5.631768000  | 7.591626000  |
| C | 10.530056000 | 8.131368000  | 11.456283000 |
| C | 7.017359000  | 7.386861000  | 12.963866000 |
| C | 5.491194000  | 7.526356000  | 12.772720000 |
| C | 9.735629000  | 7.015159000  | 13.595254000 |
| H | 10.775942000 | 6.861855000  | 13.859105000 |
| C | 5.035742000  | 8.163037000  | 11.460869000 |
| H | 5.384968000  | 9.189145000  | 11.359229000 |
| H | 3.942253000  | 8.194437000  | 11.436547000 |
| H | 5.360282000  | 7.595206000  | 10.589524000 |
| C | 7.124067000  | 14.815861000 | 11.180078000 |
| H | 6.615906000  | 15.252791000 | 12.032148000 |
| C | 7.906709000  | 4.698150000  | 4.794400000  |
| H | 7.990652000  | 3.924455000  | 4.035494000  |
| C | 9.970966000  | 14.275209000 | 6.983617000  |
| H | 9.290674000  | 15.021243000 | 6.559484000  |
| H | 10.512629000 | 13.816754000 | 6.148633000  |
| H | 10.705145000 | 14.793922000 | 7.609840000  |
| C | 4.836163000  | 6.133905000  | 12.836420000 |
| H | 5.187543000  | 5.500174000  | 12.016110000 |
| H | 3.748138000  | 6.230165000  | 12.741778000 |
| H | 5.041609000  | 5.611647000  | 13.776153000 |
| C | 5.915911000  | 13.349859000 | 13.264506000 |
| H | 5.162182000  | 14.092837000 | 12.984049000 |
| H | 6.730715000  | 13.859021000 | 13.792640000 |
| H | 5.440374000  | 12.663180000 | 13.973871000 |
| C | 10.458031000 | 9.655798000  | 11.263608000 |
| H | 11.267378000 | 9.992556000  | 10.604987000 |
| H | 10.569694000 | 10.171512000 | 12.223663000 |
| H | 9.510876000  | 9.977099000  | 10.830061000 |
| C | 9.542626000  | 8.461515000  | 3.831874000  |
| H | 10.420547000 | 7.807384000  | 3.782697000  |
| H | 9.885172000  | 9.487400000  | 3.655427000  |
| H | 8.870114000  | 8.198321000  | 3.008817000  |
| C | 8.755483000  | 6.570134000  | 14.478371000 |
| H | 9.032188000  | 6.081433000  | 15.408930000 |
| C | 8.841619000  | 8.393409000  | 5.196747000  |
| C | 7.748399000  | 15.666575000 | 10.274082000 |
| H | 7.722874000  | 16.743410000 | 10.419579000 |
| C | 4.924656000  | 8.394555000  | 13.912050000 |
| H | 5.124535000  | 7.968905000  | 14.900645000 |
| H | 3.838075000  | 8.495639000  | 13.804052000 |
| H | 5.359144000  | 9.398736000  | 13.884158000 |
| C | 7.422176000  | 6.763456000  | 14.151952000 |
| H | 6.661842000  | 6.419116000  | 14.848096000 |
| C | 9.870921000  | 8.889680000  | 6.226935000  |
| H | 10.756200000 | 8.243253000  | 6.228760000  |
| H | 9.479849000  | 8.893894000  | 7.245168000  |
| H | 10.196263000 | 9.904734000  | 5.975273000  |
| C | 7.632634000  | 9.340534000  | 5.116460000  |
| H | 7.958719000  | 10.368718000 | 4.932753000  |
| H | 7.023292000  | 9.324455000  | 6.023690000  |
| H | 6.982492000  | 9.043145000  | 4.288343000  |
| U | 2.254728000  | 10.050817000 | 7.733347000  |

|   |              |              |              |
|---|--------------|--------------|--------------|
| O | 2.056551000  | 11.914039000 | 9.011021000  |
| O | 1.961655000  | 7.902546000  | 7.052621000  |
| O | 1.879906000  | 11.010006000 | 5.786623000  |
| C | 1.909780000  | 6.597878000  | 6.857721000  |
| C | 2.039805000  | 12.885920000 | 9.905051000  |
| C | 2.662307000  | 14.146095000 | 9.626147000  |
| C | 4.432063000  | 7.498498000  | 5.186496000  |
| H | 4.886341000  | 8.176537000  | 4.456412000  |
| H | 4.242704000  | 8.060993000  | 6.103769000  |
| H | 5.164821000  | 6.719150000  | 5.418500000  |
| C | 2.475317000  | 6.014855000  | 5.677878000  |
| C | 0.121642000  | 11.664976000 | 4.328858000  |
| C | 3.372901000  | 14.416917000 | 8.293963000  |
| C | 1.406759000  | 12.682101000 | 11.172874000 |
| C | 1.297134000  | 5.748934000  | 7.833722000  |
| C | 1.426502000  | 13.713980000 | 12.113395000 |
| H | 0.956054000  | 13.566159000 | 13.079455000 |
| C | -0.370775000 | 7.379086000  | 8.825802000  |
| H | -1.200826000 | 6.927398000  | 8.270768000  |
| H | -0.773151000 | 7.788374000  | 9.759305000  |
| H | 0.013764000  | 8.200324000  | 8.219490000  |
| C | 2.652348000  | 15.128820000 | 10.618736000 |
| H | 3.135780000  | 16.080306000 | 10.428173000 |
| C | 0.712542000  | 6.329133000  | 9.126641000  |
| C | 1.519487000  | 11.530491000 | 4.621913000  |
| C | 2.198654000  | 7.966223000  | 4.096680000  |
| H | 1.257332000  | 7.524822000  | 3.748391000  |
| H | 1.969752000  | 8.695787000  | 4.869781000  |
| H | 2.648338000  | 8.498815000  | 3.251368000  |
| C | 1.849009000  | 6.935657000  | 9.963800000  |
| H | 2.423020000  | 7.682798000  | 9.410254000  |
| H | 1.450339000  | 7.399574000  | 10.872005000 |
| H | 2.553179000  | 6.155252000  | 10.267168000 |
| C | 1.292980000  | 4.368477000  | 7.623300000  |
| H | 0.841249000  | 3.716194000  | 8.362869000  |
| C | 2.418200000  | 14.182257000 | 7.111426000  |
| H | 1.509689000  | 14.786177000 | 7.223304000  |
| H | 2.900753000  | 14.478823000 | 6.173612000  |
| H | 2.124826000  | 13.138632000 | 7.023198000  |
| C | 3.154617000  | 6.874471000  | 4.605452000  |
| C | -0.821470000 | 12.039013000 | 6.644245000  |
| H | -1.556325000 | 11.693600000 | 7.381436000  |
| H | 0.171441000  | 11.968150000 | 7.088907000  |
| H | -1.013625000 | 13.100721000 | 6.454075000  |
| C | -2.374023000 | 11.480900000 | 4.821672000  |
| H | -2.560234000 | 12.541800000 | 4.622879000  |
| H | -2.588073000 | 10.915907000 | 3.908062000  |
| H | -3.093616000 | 11.158429000 | 5.582571000  |
| C | 3.869206000  | 15.866404000 | 8.184281000  |
| H | 4.617518000  | 16.104959000 | 8.947581000  |
| H | 4.351194000  | 16.000429000 | 7.209371000  |
| H | 3.053404000  | 16.596095000 | 8.252296000  |
| C | 4.614873000  | 13.519324000 | 8.186874000  |
| H | 4.375840000  | 12.459125000 | 8.285081000  |
| H | 5.111414000  | 13.668989000 | 7.221078000  |
| H | 5.333053000  | 13.774834000 | 8.971076000  |
| C | -0.950402000 | 11.230186000 | 5.340969000  |
| C | 2.487844000  | 11.949779000 | 3.663409000  |
| C | 4.023468000  | 11.890032000 | 3.815406000  |
| C | -0.260405000 | 12.196615000 | 3.097700000  |
| H | -1.313221000 | 12.300959000 | 2.860675000  |
| C | 4.541375000  | 11.334932000 | 5.140540000  |
| H | 4.257366000  | 10.295242000 | 5.292540000  |

|   |              |              |              |
|---|--------------|--------------|--------------|
| H | 5.635668000  | 11.376367000 | 5.145792000  |
| H | 4.191864000  | 11.910286000 | 5.995701000  |
| C | 2.441958000  | 4.625705000  | 5.537390000  |
| H | 2.882459000  | 4.170101000  | 4.657534000  |
| C | 2.045316000  | 14.931545000 | 11.854870000 |
| H | 2.052700000  | 15.717899000 | 12.605377000 |
| C | 0.047437000  | 5.258459000  | 10.002461000 |
| H | 0.760455000  | 4.495239000  | 10.331010000 |
| H | -0.359778000 | 5.732513000  | 10.902741000 |
| H | -0.780881000 | 4.757749000  | 9.488613000  |
| C | 4.597755000  | 13.312462000 | 3.673149000  |
| H | 4.221827000  | 13.962858000 | 4.469163000  |
| H | 5.691223000  | 13.285286000 | 3.751831000  |
| H | 4.345075000  | 13.775119000 | 2.714126000  |
| C | 3.582704000  | 6.048375000  | 3.384035000  |
| H | 4.330697000  | 5.290766000  | 3.640726000  |
| H | 2.735336000  | 5.552026000  | 2.896380000  |
| H | 4.042121000  | 6.717336000  | 2.647841000  |
| C | -0.853378000 | 9.718427000  | 5.612149000  |
| H | -1.587975000 | 9.419921000  | 6.369730000  |
| H | -1.067445000 | 9.153691000  | 4.698207000  |
| H | 0.135047000  | 9.407867000  | 5.952396000  |
| C | 0.094155000  | 11.345647000 | 12.906219000 |
| H | -0.713045000 | 12.084758000 | 12.957623000 |
| H | -0.346419000 | 10.360569000 | 13.097647000 |
| H | 0.800126000  | 11.549088000 | 13.717994000 |
| C | 0.676993000  | 12.600351000 | 2.151130000  |
| H | 0.356693000  | 13.009234000 | 1.196344000  |
| C | 0.777284000  | 11.330989000 | 11.531469000 |
| C | 1.862903000  | 3.795740000  | 6.492109000  |
| H | 1.853157000  | 2.717679000  | 6.353799000  |
| C | 4.607072000  | 11.003548000 | 2.698898000  |
| H | 4.368330000  | 11.377497000 | 1.698117000  |
| H | 5.699010000  | 10.959075000 | 2.787244000  |
| H | 4.222324000  | 9.981972000  | 2.776417000  |
| C | 2.024655000  | 12.471922000 | 2.447798000  |
| H | 2.751408000  | 12.789046000 | 1.704632000  |
| C | -0.309932000 | 10.937331000 | 10.517382000 |
| H | -1.131425000 | 11.662375000 | 10.538604000 |
| H | 0.072874000  | 10.915581000 | 9.496602000  |
| H | -0.723757000 | 9.953042000  | 10.763275000 |
| C | 1.886274000  | 10.268595000 | 11.603510000 |
| H | 1.459158000  | 9.278311000  | 11.793162000 |
| H | 2.486897000  | 10.224656000 | 10.690948000 |
| H | 2.571552000  | 10.500162000 | 12.424337000 |

$[\text{ArL}_3\text{USUArL}_3]^{1-} \text{E} = -4692.54157845$

|   |             |              |              |
|---|-------------|--------------|--------------|
| U | 7.467130000 | 9.449123000  | 8.875977000  |
| O | 7.621249000 | 7.635720000  | 7.711735000  |
| O | 7.671224000 | 11.455865000 | 9.649388000  |
| O | 7.744066000 | 8.428583000  | 10.728271000 |
| S | 5.049816000 | 9.801294000  | 8.317567000  |
| C | 7.722408000 | 12.777157000 | 9.898152000  |
| C | 7.750871000 | 6.642777000  | 6.815062000  |
| C | 7.179880000 | 5.363013000  | 7.070784000  |
| C | 5.271088000 | 11.776283000 | 11.579977000 |
| H | 4.811891000 | 11.090468000 | 12.297749000 |
| H | 5.453940000 | 11.232840000 | 10.651357000 |
| H | 4.545985000 | 12.566132000 | 11.360960000 |
| C | 7.200345000 | 13.287337000 | 11.120753000 |
| C | 9.521875000 | 7.732751000  | 12.155764000 |
| C | 6.425108000 | 5.040094000  | 8.364688000  |
| C | 8.454075000 | 6.889224000  | 5.602208000  |

|   |              |              |              |
|---|--------------|--------------|--------------|
| C | 8.295002000  | 13.656672000 | 8.935418000  |
| C | 8.542458000  | 5.859817000  | 4.661498000  |
| H | 9.067164000  | 6.029891000  | 3.729002000  |
| C | 9.943960000  | 12.117586000 | 7.777524000  |
| H | 10.793536000 | 12.557303000 | 8.310907000  |
| H | 10.301910000 | 11.764849000 | 6.804973000  |
| H | 9.626381000  | 11.252931000 | 8.362581000  |
| C | 7.300297000  | 4.383256000  | 6.080641000  |
| H | 6.859914000  | 3.407360000  | 6.244524000  |
| C | 8.831437000  | 13.160333000 | 7.587423000  |
| C | 8.124002000  | 7.873757000  | 11.892058000 |
| C | 7.530469000  | 11.292365000 | 12.632877000 |
| H | 8.467582000  | 11.739480000 | 12.983502000 |
| H | 7.764152000  | 10.589510000 | 11.838332000 |
| H | 7.100390000  | 10.726410000 | 13.465182000 |
| C | 7.666195000  | 12.608116000 | 6.752240000  |
| H | 7.106308000  | 11.814284000 | 7.253476000  |
| H | 8.029391000  | 12.229882000 | 5.791983000  |
| H | 6.946732000  | 13.404937000 | 6.546306000  |
| C | 8.314539000  | 15.025522000 | 9.218524000  |
| H | 8.738895000  | 15.714314000 | 8.498265000  |
| C | 7.330899000  | 5.287507000  | 9.580502000  |
| H | 8.263395000  | 4.718725000  | 9.490467000  |
| H | 6.830355000  | 4.958846000  | 10.496891000 |
| H | 7.579930000  | 6.339118000  | 9.694551000  |
| C | 6.550182000  | 12.383657000 | 12.172292000 |
| C | 10.471190000 | 7.365832000  | 9.843635000  |
| H | 11.221621000 | 7.700094000  | 9.119024000  |
| H | 9.487775000  | 7.434699000  | 9.376854000  |
| H | 10.649509000 | 6.303839000  | 10.041838000 |
| C | 12.017506000 | 7.929535000  | 11.664622000 |
| H | 12.212337000 | 6.867456000  | 11.844989000 |
| H | 12.224375000 | 8.481823000  | 12.587072000 |
| H | 12.733890000 | 8.270720000  | 10.909393000 |
| C | 5.978979000  | 3.571937000  | 8.427225000  |
| H | 5.271948000  | 3.321594000  | 7.629318000  |
| H | 5.461758000  | 3.404924000  | 9.378234000  |
| H | 6.822042000  | 2.872877000  | 8.383586000  |
| C | 5.146930000  | 5.885698000  | 8.434011000  |
| H | 5.346567000  | 6.955605000  | 8.366139000  |
| H | 4.616843000  | 5.693230000  | 9.372273000  |
| H | 4.478155000  | 5.617340000  | 7.613351000  |
| C | 10.592557000 | 8.175746000  | 11.145882000 |
| C | 7.161480000  | 7.428895000  | 12.837101000 |
| C | 5.624774000  | 7.491527000  | 12.711777000 |
| C | 9.915229000  | 7.164914000  | 13.367520000 |
| H | 10.969319000 | 7.052030000  | 13.590171000 |
| C | 5.088375000  | 8.092470000  | 11.415731000 |
| H | 5.387392000  | 9.129563000  | 11.286509000 |
| H | 3.995104000  | 8.071147000  | 11.445460000 |
| H | 5.400489000  | 7.530029000  | 10.538091000 |
| C | 7.249391000  | 14.667844000 | 11.333030000 |
| H | 6.846444000  | 15.078893000 | 12.250566000 |
| C | 7.966158000  | 4.616817000  | 4.884387000  |
| H | 8.040225000  | 3.833583000  | 4.134894000  |
| C | 9.453864000  | 14.290263000 | 6.752943000  |
| H | 8.722032000  | 15.062741000 | 6.497328000  |
| H | 9.827947000  | 13.872578000 | 5.811795000  |
| H | 10.298384000 | 14.766685000 | 7.262235000  |
| C | 5.047920000  | 6.066924000  | 12.815284000 |
| H | 5.389002000  | 5.446246000  | 11.981373000 |
| H | 3.953041000  | 6.107189000  | 12.776948000 |
| H | 5.328577000  | 5.564190000  | 13.745455000 |

|   |              |              |              |
|---|--------------|--------------|--------------|
| C | 6.129240000  | 13.161446000 | 13.427469000 |
| H | 5.375148000  | 13.924219000 | 13.207485000 |
| H | 6.978595000  | 13.641913000 | 13.926452000 |
| H | 5.681595000  | 12.460781000 | 14.140384000 |
| C | 10.498043000 | 9.686460000  | 10.880096000 |
| H | 11.210307000 | 9.983763000  | 10.102102000 |
| H | 10.738956000 | 10.250320000 | 11.787072000 |
| H | 9.501683000  | 10.018410000 | 10.581652000 |
| C | 9.823357000  | 8.271339000  | 3.953349000  |
| H | 10.655582000 | 7.559789000  | 3.937131000  |
| H | 10.238882000 | 9.271506000  | 3.789911000  |
| H | 9.162438000  | 8.051035000  | 3.109366000  |
| C | 8.986988000  | 6.734148000  | 14.308913000 |
| H | 9.317110000  | 6.297015000  | 15.247284000 |
| C | 9.074039000  | 8.256004000  | 5.293932000  |
| C | 7.796672000  | 15.538079000 | 10.399592000 |
| H | 7.820323000  | 16.607161000 | 10.592226000 |
| C | 5.062220000  | 8.335311000  | 13.871224000 |
| H | 5.316689000  | 7.922128000  | 14.851967000 |
| H | 3.969434000  | 8.381034000  | 13.802995000 |
| H | 5.444619000  | 9.359205000  | 13.828353000 |
| C | 7.637676000  | 6.869149000  | 14.031734000 |
| H | 6.919021000  | 6.528407000  | 14.770921000 |
| C | 10.116181000 | 8.640474000  | 6.357743000  |
| H | 10.897917000 | 7.876602000  | 6.418149000  |
| H | 9.699341000  | 8.734213000  | 7.362494000  |
| H | 10.591855000 | 9.591822000  | 6.099136000  |
| C | 7.959953000  | 9.306488000  | 5.176472000  |
| H | 8.387493000  | 10.306201000 | 5.054537000  |
| H | 7.274872000  | 9.314739000  | 6.028862000  |
| H | 7.342371000  | 9.098381000  | 4.298218000  |
| U | 2.414382000  | 10.005882000 | 7.787271000  |
| O | 2.140806000  | 11.739849000 | 9.206843000  |
| O | 2.227206000  | 7.890974000  | 7.041436000  |
| O | 1.967330000  | 11.005560000 | 5.908527000  |
| C | 2.164396000  | 6.587692000  | 6.797739000  |
| C | 1.953024000  | 12.702396000 | 10.102481000 |
| C | 2.435162000  | 14.024439000 | 9.845781000  |
| C | 4.695702000  | 7.581845000  | 5.198883000  |
| H | 5.159100000  | 8.275459000  | 4.489030000  |
| H | 4.472442000  | 8.128416000  | 6.116667000  |
| H | 5.430487000  | 6.809143000  | 5.440830000  |
| C | 2.761823000  | 6.048073000  | 5.616885000  |
| C | 0.179273000  | 11.885277000 | 4.611461000  |
| C | 3.153591000  | 14.378912000 | 8.538630000  |
| C | 1.281307000  | 12.424361000 | 11.332730000 |
| C | 1.520391000  | 5.714532000  | 7.726491000  |
| C | 1.120437000  | 13.456348000 | 12.261190000 |
| H | 0.614135000  | 13.258448000 | 13.199260000 |
| C | -0.267555000 | 7.271675000  | 8.569351000  |
| H | -1.023179000 | 6.779092000  | 7.947494000  |
| H | -0.771139000 | 7.674400000  | 9.454684000  |
| H | 0.137254000  | 8.099284000  | 7.985663000  |
| C | 2.247942000  | 15.004832000 | 10.823790000 |
| H | 2.616305000  | 16.009135000 | 10.648231000 |
| C | 0.823196000  | 6.265105000  | 8.974836000  |
| C | 1.580056000  | 11.708128000 | 4.845499000  |
| C | 2.473438000  | 8.025836000  | 4.072010000  |
| H | 1.571152000  | 7.566936000  | 3.651110000  |
| H | 2.171608000  | 8.707559000  | 4.863956000  |
| H | 2.947626000  | 8.616182000  | 3.279846000  |
| C | 1.859237000  | 6.906092000  | 9.912023000  |
| H | 2.504956000  | 7.624144000  | 9.401966000  |

|   |              |              |              |
|---|--------------|--------------|--------------|
| H | 1.360977000  | 7.407713000  | 10.747521000 |
| H | 2.518405000  | 6.137760000  | 10.327737000 |
| C | 1.551153000  | 4.338676000  | 7.489462000  |
| H | 1.081636000  | 3.663387000  | 8.196242000  |
| C | 2.229777000  | 14.109163000 | 7.339998000  |
| H | 1.295911000  | 14.674569000 | 7.437564000  |
| H | 2.712876000  | 14.421956000 | 6.408224000  |
| H | 1.982605000  | 13.053981000 | 7.250776000  |
| C | 3.444032000  | 6.945945000  | 4.578091000  |
| C | -0.803040000 | 11.781790000 | 6.944703000  |
| H | -1.532806000 | 11.275681000 | 7.587593000  |
| H | 0.185242000  | 11.669793000 | 7.394073000  |
| H | -1.032764000 | 12.852297000 | 6.954961000  |
| C | -2.307527000 | 11.498581000 | 5.020021000  |
| H | -2.554811000 | 12.565479000 | 5.029304000  |
| H | -2.475716000 | 11.113538000 | 4.008561000  |
| H | -3.015484000 | 10.993370000 | 5.686001000  |
| C | 3.550473000  | 15.860840000 | 8.473797000  |
| H | 4.252037000  | 16.134526000 | 9.269442000  |
| H | 4.053696000  | 16.050075000 | 7.519061000  |
| H | 2.684784000  | 16.530947000 | 8.526260000  |
| C | 4.456194000  | 13.574540000 | 8.419140000  |
| H | 4.296288000  | 12.499776000 | 8.502128000  |
| H | 4.934039000  | 13.776608000 | 7.454900000  |
| H | 5.158047000  | 13.867696000 | 9.206298000  |
| C | -0.877751000 | 11.226559000 | 5.512628000  |
| C | 2.531757000  | 12.283080000 | 3.958130000  |
| C | 4.066590000  | 12.132198000 | 4.026651000  |
| C | -0.223395000 | 12.664626000 | 3.527165000  |
| H | -1.279739000 | 12.817689000 | 3.339301000  |
| C | 4.608418000  | 11.320992000 | 5.202398000  |
| H | 4.225613000  | 10.301791000 | 5.207125000  |
| H | 5.698666000  | 11.260096000 | 5.119188000  |
| H | 4.384465000  | 11.784003000 | 6.163272000  |
| C | 2.754296000  | 4.661876000  | 5.442181000  |
| H | 3.220794000  | 4.233826000  | 4.562348000  |
| C | 1.598062000  | 14.738921000 | 12.023521000 |
| H | 1.464728000  | 15.523416000 | 12.763853000 |
| C | 0.119729000  | 5.169937000  | 9.787041000  |
| H | 0.823527000  | 4.423755000  | 10.169963000 |
| H | -0.374686000 | 5.626532000  | 10.651846000 |
| H | -0.648114000 | 4.652441000  | 9.201888000  |
| C | 4.718755000  | 13.524702000 | 4.106497000  |
| H | 4.412566000  | 14.044782000 | 5.019301000  |
| H | 5.810241000  | 13.424785000 | 4.126293000  |
| H | 4.460717000  | 14.160843000 | 3.254410000  |
| C | 3.914197000  | 6.156290000  | 3.348265000  |
| H | 4.675181000  | 5.411170000  | 3.603189000  |
| H | 3.087745000  | 5.650145000  | 2.836109000  |
| H | 4.369236000  | 6.851170000  | 2.633717000  |
| C | -0.703645000 | 9.698116000  | 5.508581000  |
| H | -1.462525000 | 9.228785000  | 6.145302000  |
| H | -0.824874000 | 9.302606000  | 4.494502000  |
| H | 0.280848000  | 9.387726000  | 5.860155000  |
| C | 0.065599000  | 10.948428000 | 13.022460000 |
| H | -0.830166000 | 11.579190000 | 13.032975000 |
| H | -0.254938000 | 9.917363000  | 13.208427000 |
| H | 0.706135000  | 11.245567000 | 13.859201000 |
| C | 0.697429000  | 13.256844000 | 2.668011000  |
| H | 0.360158000  | 13.862978000 | 1.831483000  |
| C | 0.803923000  | 11.009193000 | 11.677925000 |
| C | 2.170533000  | 3.802188000  | 6.366786000  |
| H | 2.185933000  | 2.727503000  | 6.205911000  |

|   |              |              |              |
|---|--------------|--------------|--------------|
| C | 4.547707000  | 11.432413000 | 2.741145000  |
| H | 4.276864000  | 11.988054000 | 1.838028000  |
| H | 5.639463000  | 11.328973000 | 2.754686000  |
| H | 4.116373000  | 10.429480000 | 2.660158000  |
| C | 2.049607000  | 13.051037000 | 2.889242000  |
| H | 2.762910000  | 13.502640000 | 2.205676000  |
| C | -0.176880000 | 10.473436000 | 10.623572000 |
| H | -1.063543000 | 11.113498000 | 10.558921000 |
| H | 0.269568000  | 10.441310000 | 9.629234000  |
| H | -0.507737000 | 9.464375000  | 10.891910000 |
| C | 2.031340000  | 10.094539000 | 11.804840000 |
| H | 1.727035000  | 9.065980000  | 12.024615000 |
| H | 2.640359000  | 10.097416000 | 10.898078000 |
| H | 2.668350000  | 10.437064000 | 12.625332000 |

[<sup>Ar</sup>L<sub>3</sub>USU<sup>Ar</sup>L<sub>3</sub>] E = -4692.46060697

|   |              |              |              |
|---|--------------|--------------|--------------|
| U | 7.545629000  | 9.462903000  | 8.906604000  |
| O | 7.649900000  | 7.668541000  | 7.752173000  |
| O | 7.667182000  | 11.446462000 | 9.683158000  |
| O | 7.780005000  | 8.444763000  | 10.742764000 |
| S | 5.031269000  | 9.744768000  | 8.389537000  |
| C | 7.733680000  | 12.773250000 | 9.942767000  |
| C | 7.806621000  | 6.663110000  | 6.861258000  |
| C | 7.243386000  | 5.382413000  | 7.119702000  |
| C | 5.282739000  | 11.763414000 | 11.649485000 |
| H | 4.839922000  | 11.081601000 | 12.380551000 |
| H | 5.455721000  | 11.211319000 | 10.724590000 |
| H | 4.550281000  | 12.546860000 | 11.432854000 |
| C | 7.203238000  | 13.279976000 | 11.160659000 |
| C | 9.581034000  | 7.757996000  | 12.151961000 |
| C | 6.479245000  | 5.054588000  | 8.405987000  |
| C | 8.522778000  | 6.910703000  | 5.657969000  |
| C | 8.322172000  | 13.646186000 | 8.986298000  |
| C | 8.631620000  | 5.875969000  | 4.725048000  |
| H | 9.166591000  | 6.044719000  | 3.798618000  |
| C | 10.031176000 | 12.133137000 | 7.884983000  |
| H | 10.843151000 | 12.590852000 | 8.459416000  |
| H | 10.441128000 | 11.803025000 | 6.925173000  |
| H | 9.722818000  | 11.247630000 | 8.443419000  |
| C | 7.384964000  | 4.397632000  | 6.136926000  |
| H | 6.953087000  | 3.418456000  | 6.301735000  |
| C | 8.900070000  | 13.147834000 | 7.656237000  |
| C | 8.180157000  | 7.888712000  | 11.907673000 |
| C | 7.557331000  | 11.295502000 | 12.676325000 |
| H | 8.496115000  | 11.749620000 | 13.012161000 |
| H | 7.785496000  | 10.587858000 | 11.884149000 |
| H | 7.140680000  | 10.732799000 | 13.517298000 |
| C | 7.770998000  | 12.569039000 | 6.792273000  |
| H | 7.191313000  | 11.785805000 | 7.289208000  |
| H | 8.171282000  | 12.171387000 | 5.856011000  |
| H | 7.056734000  | 13.356108000 | 6.540742000  |
| C | 8.329963000  | 15.016385000 | 9.263491000  |
| H | 8.763471000  | 15.703997000 | 8.548199000  |
| C | 7.375423000  | 5.307296000  | 9.627071000  |
| H | 8.310521000  | 4.742621000  | 9.542680000  |
| H | 6.870390000  | 4.976006000  | 10.539470000 |
| H | 7.619652000  | 6.359501000  | 9.743158000  |
| C | 6.566048000  | 12.379068000 | 12.221550000 |
| C | 10.506465000 | 7.394180000  | 9.829246000  |
| H | 11.251618000 | 7.727220000  | 9.099588000  |
| H | 9.520002000  | 7.459573000  | 9.367858000  |
| H | 10.684393000 | 6.332157000  | 10.026452000 |
| C | 12.070823000 | 7.960707000  | 11.631173000 |

|   |              |              |              |
|---|--------------|--------------|--------------|
| H | 12.269666000 | 6.899290000  | 11.809702000 |
| H | 12.288542000 | 8.514670000  | 12.549890000 |
| H | 12.775892000 | 8.302907000  | 10.866049000 |
| C | 6.044054000  | 3.583150000  | 8.466267000  |
| H | 5.348235000  | 3.324155000  | 7.661371000  |
| H | 5.519471000  | 3.414064000  | 9.412703000  |
| H | 6.893191000  | 2.891507000  | 8.432690000  |
| C | 5.194183000  | 5.890136000  | 8.463863000  |
| H | 5.384174000  | 6.961909000  | 8.404698000  |
| H | 4.655412000  | 5.686918000  | 9.394827000  |
| H | 4.537500000  | 5.621283000  | 7.632816000  |
| C | 10.638750000 | 8.203106000  | 11.130428000 |
| C | 7.231998000  | 7.436779000  | 12.861738000 |
| C | 5.694045000  | 7.470670000  | 12.752441000 |
| C | 9.993282000  | 7.198942000  | 13.361429000 |
| H | 11.050613000 | 7.093366000  | 13.570202000 |
| C | 5.138463000  | 8.042964000  | 11.452846000 |
| H | 5.399566000  | 9.090605000  | 11.320365000 |
| H | 4.047149000  | 7.980010000  | 11.482834000 |
| H | 5.474840000  | 7.487118000  | 10.580291000 |
| C | 7.240425000  | 14.662140000 | 11.366044000 |
| H | 6.829113000  | 15.074432000 | 12.278894000 |
| C | 8.063226000  | 4.630199000  | 4.948424000  |
| H | 8.154080000  | 3.843263000  | 4.204930000  |
| C | 9.521613000  | 14.283044000 | 6.827802000  |
| H | 8.782916000  | 15.042003000 | 6.552902000  |
| H | 9.921688000  | 13.865472000 | 5.897636000  |
| H | 10.347711000 | 14.774869000 | 7.351789000  |
| C | 5.145845000  | 6.036326000  | 12.879864000 |
| H | 5.496817000  | 5.409249000  | 12.055194000 |
| H | 4.050264000  | 6.054167000  | 12.845934000 |
| H | 5.439610000  | 5.554189000  | 13.816316000 |
| C | 6.155304000  | 13.160595000 | 13.477854000 |
| H | 5.390584000  | 13.914511000 | 13.264337000 |
| H | 7.006931000  | 13.651485000 | 13.961800000 |
| H | 5.724995000  | 12.459225000 | 14.200545000 |
| C | 10.537132000 | 9.713475000  | 10.872276000 |
| H | 11.234599000 | 10.016665000 | 10.083822000 |
| H | 10.790656000 | 10.274309000 | 11.777464000 |
| H | 9.533917000  | 10.048703000 | 10.596966000 |
| C | 9.887644000  | 8.289353000  | 4.002244000  |
| H | 10.725351000 | 7.584606000  | 3.994056000  |
| H | 10.295942000 | 9.291388000  | 3.833651000  |
| H | 9.230575000  | 8.058059000  | 3.158365000  |
| C | 9.080068000  | 6.768628000  | 14.316787000 |
| H | 9.424885000  | 6.340399000  | 15.253770000 |
| C | 9.134581000  | 8.278569000  | 5.340988000  |
| C | 7.789681000  | 15.530665000 | 10.433242000 |
| H | 7.803293000  | 16.600699000 | 10.620490000 |
| C | 5.125606000  | 8.317912000  | 13.905961000 |
| H | 5.397241000  | 7.921283000  | 14.888681000 |
| H | 4.031338000  | 8.339844000  | 13.848068000 |
| H | 5.487504000  | 9.348395000  | 13.848031000 |
| C | 7.727137000  | 6.889796000  | 14.054876000 |
| H | 7.020260000  | 6.546826000  | 14.803811000 |
| C | 10.171404000 | 8.678310000  | 6.402477000  |
| H | 10.961025000 | 7.923573000  | 6.467764000  |
| H | 9.758213000  | 8.772837000  | 7.409394000  |
| H | 10.635994000 | 9.634066000  | 6.140537000  |
| C | 8.014804000  | 9.319251000  | 5.208379000  |
| H | 8.438521000  | 10.316142000 | 5.059892000  |
| H | 7.334632000  | 9.347035000  | 6.065155000  |
| H | 7.393209000  | 9.088508000  | 4.339372000  |



|   |              |              |              |
|---|--------------|--------------|--------------|
| U | 2.505196000  | 9.960376000  | 7.880981000  |
| O | 2.287751000  | 11.698767000 | 9.098305000  |
| O | 2.357080000  | 7.983100000  | 7.091466000  |
| O | 2.157030000  | 10.892220000 | 6.020553000  |
| C | 2.236771000  | 6.670960000  | 6.789729000  |
| C | 2.155612000  | 12.676145000 | 10.025853000 |
| C | 2.651949000  | 13.980826000 | 9.756466000  |
| C | 4.809322000  | 7.638448000  | 5.216160000  |
| H | 5.297845000  | 8.319013000  | 4.512631000  |
| H | 4.609249000  | 8.183315000  | 6.139777000  |
| H | 5.514824000  | 6.837364000  | 5.452050000  |
| C | 2.827277000  | 6.160211000  | 5.600524000  |
| C | 0.344681000  | 11.731659000 | 4.714562000  |
| C | 3.316636000  | 14.354826000 | 8.429206000  |
| C | 1.529627000  | 12.378214000 | 11.266779000 |
| C | 1.537790000  | 5.812258000  | 7.681643000  |
| C | 1.440019000  | 13.393964000 | 12.222531000 |
| H | 0.970288000  | 13.190751000 | 13.176842000 |
| C | -0.215028000 | 7.395415000  | 8.594157000  |
| H | -0.910405000 | 7.020098000  | 7.837280000  |
| H | -0.794449000 | 7.663826000  | 9.483246000  |
| H | 0.215220000  | 8.315937000  | 8.196418000  |
| C | 2.537195000  | 14.943976000 | 10.763643000 |
| H | 2.919911000  | 15.941902000 | 10.590012000 |
| C | 0.831418000  | 6.324927000  | 8.944151000  |
| C | 1.747018000  | 11.592758000 | 4.939770000  |
| C | 2.596062000  | 8.157603000  | 4.088056000  |
| H | 1.681247000  | 7.722582000  | 3.670847000  |
| H | 2.317354000  | 8.846194000  | 4.881060000  |
| H | 3.078987000  | 8.737254000  | 3.294993000  |
| C | 1.862086000  | 6.855011000  | 9.948229000  |
| H | 2.501835000  | 7.641887000  | 9.542013000  |
| H | 1.358043000  | 7.242902000  | 10.838338000 |
| H | 2.532063000  | 6.051335000  | 10.265297000 |
| C | 1.514887000  | 4.444236000  | 7.394188000  |
| H | 1.003779000  | 3.764846000  | 8.064613000  |
| C | 2.356326000  | 14.083024000 | 7.261144000  |
| H | 1.419804000  | 14.634705000 | 7.398973000  |
| H | 2.801223000  | 14.414968000 | 6.318301000  |
| H | 2.117172000  | 13.028116000 | 7.162614000  |
| C | 3.542214000  | 7.052559000  | 4.581348000  |
| C | -0.617878000 | 11.646224000 | 7.048356000  |
| H | -1.316358000 | 11.126895000 | 7.713210000  |
| H | 0.381708000  | 11.585816000 | 7.482959000  |
| H | -0.877086000 | 12.709675000 | 7.052579000  |
| C | -2.139189000 | 11.346712000 | 5.147995000  |
| H | -2.380839000 | 12.414459000 | 5.143478000  |
| H | -2.323301000 | 10.944186000 | 4.146696000  |
| H | -2.838149000 | 10.855807000 | 5.833339000  |
| C | 3.685071000  | 15.844065000 | 8.362467000  |
| H | 4.420301000  | 16.122709000 | 9.124459000  |
| H | 4.136808000  | 16.049657000 | 7.386126000  |
| H | 2.810252000  | 16.495620000 | 8.464251000  |
| C | 4.629746000  | 13.574310000 | 8.279198000  |
| H | 4.494808000  | 12.493733000 | 8.341917000  |
| H | 5.091031000  | 13.807278000 | 7.315467000  |
| H | 5.332377000  | 13.862217000 | 9.066774000  |
| C | -0.703800000 | 11.075324000 | 5.625607000  |
| C | 2.686938000  | 12.174195000 | 4.049698000  |
| C | 4.225140000  | 12.074078000 | 4.107269000  |
| C | -0.077676000 | 12.484817000 | 3.619080000  |
| H | -1.136781000 | 12.609447000 | 3.431167000  |
| C | 4.787842000  | 11.288268000 | 5.286163000  |

|   |              |              |              |
|---|--------------|--------------|--------------|
| H | 4.430996000  | 10.260994000 | 5.296582000  |
| H | 5.877945000  | 11.255889000 | 5.201450000  |
| H | 4.551624000  | 11.752952000 | 6.241981000  |
| C | 2.765984000  | 4.781213000  | 5.380788000  |
| H | 3.226049000  | 4.364062000  | 4.493816000  |
| C | 1.944118000  | 14.664882000 | 11.987026000 |
| H | 1.869332000  | 15.435365000 | 12.749340000 |
| C | 0.060433000  | 5.209321000  | 9.667471000  |
| H | 0.720590000  | 4.411730000  | 10.021643000 |
| H | -0.437978000 | 5.633163000  | 10.545602000 |
| H | -0.711000000 | 4.765415000  | 9.029952000  |
| C | 4.831997000  | 13.487605000 | 4.171417000  |
| H | 4.507554000  | 14.011101000 | 5.074896000  |
| H | 5.925577000  | 13.419631000 | 4.195111000  |
| H | 4.558557000  | 14.102909000 | 3.309357000  |
| C | 3.996917000  | 6.269937000  | 3.341062000  |
| H | 4.734641000  | 5.498883000  | 3.586116000  |
| H | 3.159731000  | 5.799624000  | 2.813316000  |
| H | 4.475884000  | 6.966641000  | 2.644868000  |
| C | -0.537837000 | 9.546583000  | 5.622734000  |
| H | -1.309712000 | 9.084151000  | 6.246993000  |
| H | -0.649496000 | 9.156266000  | 4.606256000  |
| H | 0.435392000  | 9.214013000  | 5.985003000  |
| C | 0.325157000  | 10.921731000 | 12.979145000 |
| H | -0.546853000 | 11.581508000 | 13.038233000 |
| H | -0.021519000 | 9.898739000  | 13.160178000 |
| H | 1.012687000  | 11.180661000 | 13.790108000 |
| C | 0.827107000  | 13.084971000 | 2.751155000  |
| H | 0.474122000  | 13.670563000 | 1.906953000  |
| C | 1.004371000  | 10.979078000 | 11.602739000 |
| C | 2.132993000  | 3.921323000  | 6.267569000  |
| H | 2.107099000  | 2.852853000  | 6.072921000  |
| C | 4.725952000  | 11.383966000 | 2.824094000  |
| H | 4.434055000  | 11.923903000 | 1.918567000  |
| H | 5.820564000  | 11.324517000 | 2.837412000  |
| H | 4.334433000  | 10.365203000 | 2.748368000  |
| C | 2.182545000  | 12.916980000 | 2.972186000  |
| H | 2.883054000  | 13.376800000 | 2.282245000  |
| C | -0.058118000 | 10.523022000 | 10.591551000 |
| H | -0.882054000 | 11.241926000 | 10.545843000 |
| H | 0.326787000  | 10.424960000 | 9.575318000  |
| H | -0.468343000 | 9.552695000  | 10.888160000 |
| C | 2.187519000  | 10.005108000 | 11.661945000 |
| H | 1.836799000  | 8.983252000  | 11.826649000 |
| H | 2.804292000  | 10.024397000 | 10.758313000 |
| H | 2.846640000  | 10.269427000 | 12.491736000 |

## S8. References

- 1 G. A. Bain and J. F. Berry, *J. Chem. Educ.*, 2008, **85**, 532.
- 2 D. E. Bergbreiter, *J. Am. Chem. Soc.*, 1978, **100**, 2126–2134.
- 3 A. G. Tskhovrebov, B. Vuichoud, E. Solari, R. Scopelliti and K. Severin, *J. Am. Chem. Soc.*, 2013, **135**, 9486–9492.
- 4 M. J. Monreal, R. K. Thomson, T. Cantat, N. E. Travia, B. L. Scott and J. L. Kiplinger, *Organometallics*, 2011, **30**, 2031–2038.
- 5 S. M. Mansell, N. Kaltsoyannis and P. L. Arnold, *J. Am. Chem. Soc.*, 2011, **133**, 9036–9051.
- 6 L. R. Avens, D. M. Barnhart, C. J. Burns, S. D. McKee and W. H. Smith, *Inorg. Chem.*, 1994, **33**, 4245–4254.
- 7 CrysAlisPro (Rigaku, V1.171.42.72a, 2022).
- 8 G. M. Sheldrick, *Acta Crystallogr A Found Adv*, 2015, **71**, 3–8.
- 9 O. V. Dolomanov, L. J. Bourhis, R. J. Gildea, J. A. K. Howard and H. Puschmann, *J Appl Crystallogr*, 2009, **42**, 339–341.
- 10 G. M. Sheldrick, *Acta Crystallogr C Struct Chem*, 2015, **71**, 3–8.
- 11 (a) A. D. Becke, *J. Chem. Phys.* 1993, **98**, 5648–5652; (b) K. Burke, J. P. Perdew, W. Yang, in *Electronic Density Functional Theory: Recent Progress and New Directions*, Eds: J. F. Dobson, G. Vignale, M. P. Das, Plenum, New York, 1998
- 12 (a) A. Moritz, X. Cao and M. Dolg, *Theor. Chem. Acc.*, 2007, **118**, 845–854; (b) A. Hollwarth, M. Bohme, S. Dapprich, A.W. Ehlers, A. Gobbi, V. Jonas, K.F. Kohler, R. Stegmann, A. Veldkamp, G. Frenking *J. Chem. Phys.*, 1993, **208**, 237–240.
- 13 (a) P. C. Hariharan and J. A. Pople, *Theor. Chim. Acta*, 1973, **28**, 213–222; (b) W. J. Hehre, R. Ditchfield and J. A. Pople, *J. Chem. Phys.*, 1972, **56**, 2257–2261.
- 14 S. Grimme, S. Ehrlich, L. Goerigk, *J. Comp. Chem.*, 2011, **32**, 1456–1465.
- 15 A. V. Marenich, C. J. Cramer, and D. G. Truhlar *J. Phys. Chem. B*, 2009, **113**, 6378–6396.
- 16 Gaussian 09, Revision D.01: M. J. Frisch, G. W. Trucks, H. B. Schlegel, G. E. Scuseria, M. A. Robb, J. R. Cheesman, G. Scalmani, V. Barone, B. Mennucci, G. A. Petersson, H. Nakatsuji, M. Caricato, X. Li, H. P. Hratchian, A. F. Izmaylov, J. Bloino, G. Zheng, J. L. Sonnenberg, M. Hada, M. Ehara, K. Toyota, R. Fukuda, J. Hasegawa, M. Ishida, T. Nakajima, Y. Honda, O. Kitao, H. Nakai, T. Vreven, J. A., Jr. Montgomery, J. E. Peralta, F. Ogliaro, M. Bearpark, J. J. Heyd, E. Brothers, K. N. Kudin, V. N. Staroverov, R. Kobayashi, J. Normand, K. Raghavachari, J. C. Burant, S. S. Iyengar, J. Tomasi, M. Cossi, N. Rega, M. J. Millam, M. Klene, J. E. Knox, J. B. Cross, V. Bakken, C. Adamo, J. Jaramillo, R. Gomperts, R. E. Stratmann, O. Yazyev, A. J. Austin, R. Cammi, C. Pomelli, J. W. Ochterski, R. L. Martin, K. Morokuma, V. G. Zakrzewski, G. A. Voth, P. Salvador, J. J. Dannenberg, S. Dapprich, A. D. Daniels, O. Farkas, J. B. Foresman, J. V. Ortiz, J. Cioslowski and D. J. Fox, Gaussian Inc., 2009, Wallingford CT.
